# Supplementary material for: Aspartyl Protease Inhibitors as Anti-Filarial Drugs
Source: MDPI journal article supplement (doi:10.3390/pathogens11060707), 2022-06-18
Supplement: s1 [file s1]

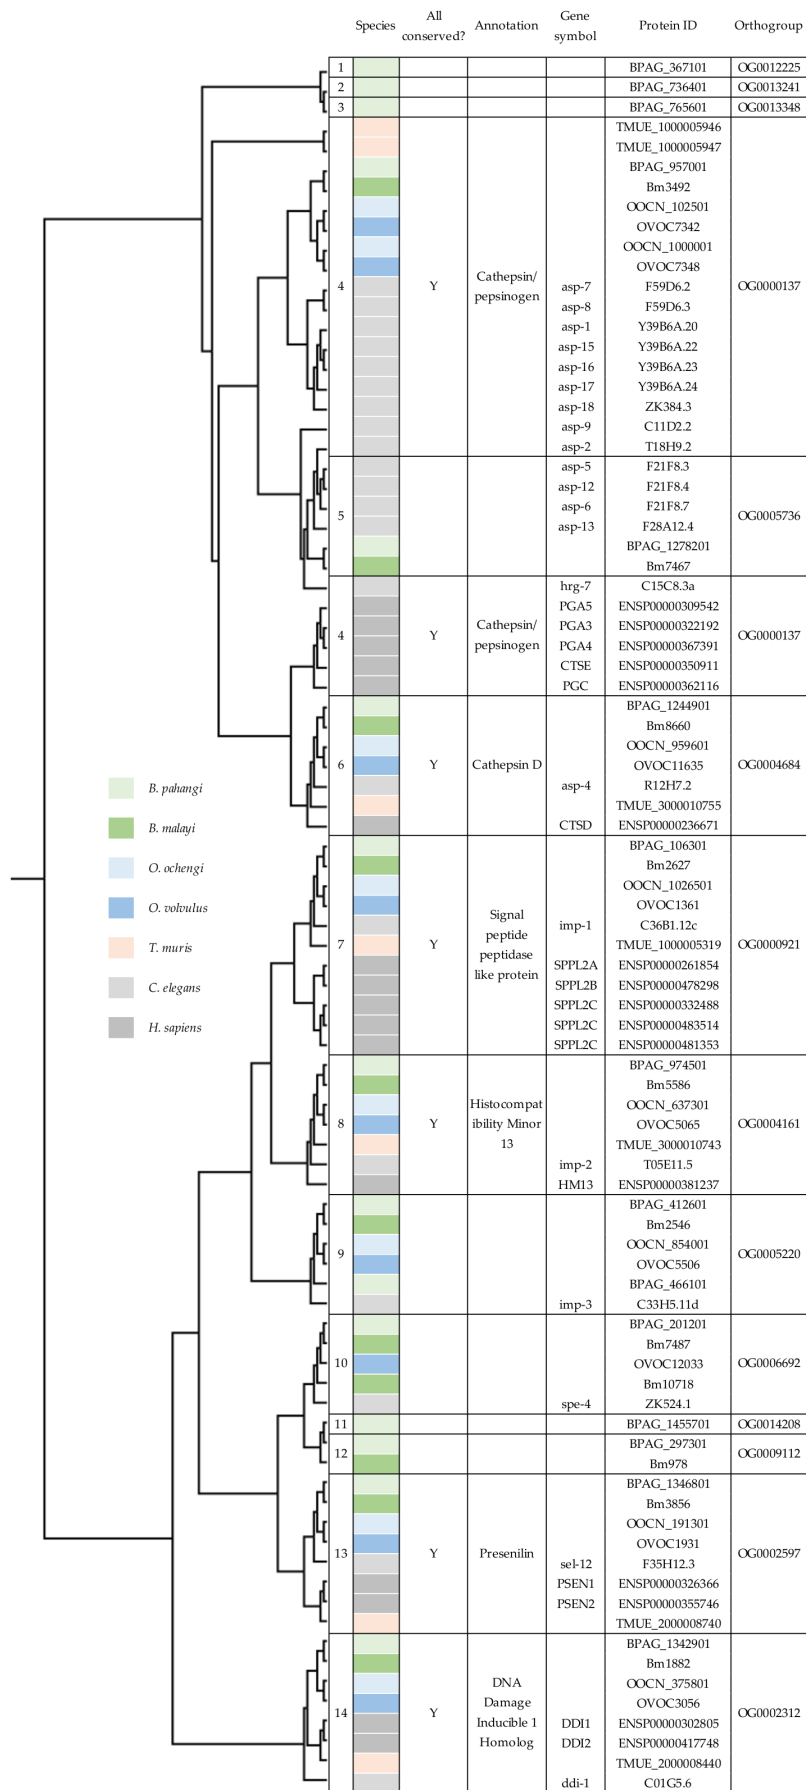

**Supplementary Figure S1:** Sequence based-clustering of proteins from 14 aspartic protease orthologous protein families (OPFs) identified in *B. pahangi*
