# Supplementary material for: Aspartyl Protease Inhibitors as Anti-Filarial Drugs
Source: Pathogens. 2022 Jun 18;11(6):707. doi: 10.3390/pathogens11060707 (PMC9227574; doi:10.3390/pathogens11060707)
Supplement: Supplementary file 1 [file pathogens-11-00707-s001.zip › Supplementary_Tables.xlsx]

## Sheet: Supplementary table S1
	Supplementary Table S1: Motility inhibition (%) of adult Brugia species treated in vitro with aspartyl protease inhibitors
	Compound		Inhibition of Motility (%)
		Concen-tration (µM)	B. malayi					B. pahangi
			Day 0	Day 1	Day 2	Day 3	Day 6	Day 6
	Amprenavir	50	36	32	26	26	45	-
		30	44	28	21	13	18	24
	Atazanavir	50	21	0	0	2	0	-
		30	54	21	15	6	11	11
	Darunavir	50	14	5	1	0	2	0*
	Pepstatin A	50	14	5	1	0	2	0*
	Ritonavir	50	70	76	81	98	96	-
		30	50	45	25	19	82	52**
	Lopinavir	30	34	79	99	99	98	98
		10	26	8	10	0	21	-
	Nelfinavir	30	24	85	99	99	99	99
		10	25	5	21	33	80	-
	* measurement at 30µM, ** measurement at 10µM, - not tested

## Sheet: Supplementary table S2
	Supplementary Table S2: RNA-seq sample metadata including read mapping statistics and raw data accession identifiers.
	Meta data						Treatment			RNA-seq Statistics
	Sample Name	Accession number (Bioproject PRJNA840851)	Species	Stage	Sex	Age	Compound	Concentration	Time	Input READS	Cleaned READS	Percent Clean READS	Cleaned Paired READS	Mapped READS	Percent Mapped READS	Fragments Spanning SJ	RATIO (fragSpanningSJ/ mappedFrag)	Average Fragment Length
	bp_f_dmso_2	SRR19331755	B. pahangi	Adult	Female	118 dpi	DMSO	0.01	1 hour	33061344	31409381	0.950033	30410210	28241164	0.928674	17533713	1.242	268.74
	bp_f_dmso_3	SRR19331754	B. pahangi	Adult	Female	118 dpi	DMSO	0.01	1 hour	38421256	36432125	0.948228	35274366	32727244	0.927791	20302188	1.241	268.76
	bp_f_dmso_4	SRR19331753	B. pahangi	Adult	Female	118 dpi	DMSO	0.01	1 hour	37288462	35325538	0.947358	34136076	31606668	0.925902	19480158	1.233	266.4
	bp_f_lop_1	SRR19331752	B. pahangi	Adult	Female	118 dpi	Lopinavir	100 µM	1 hour	35422866	33439110	0.943998	32239574	29745056	0.922626	18247052	1.227	268.42
	bp_f_lop_2	SRR19331751	B. pahangi	Adult	Female	118 dpi	Lopinavir	100 µM	1 hour	27705018	26209007	0.946002	25365154	23500212	0.926476	14105612	1.2	268.8
	bp_f_lop_3	SRR19331750	B. pahangi	Adult	Female	118 dpi	Lopinavir	100 µM	1 hour	32228432	30538566	0.947566	29590184	27408408	0.926267	17004372	1.241	266.71
	bp_f_nel_2	SRR19331749	B. pahangi	Adult	Female	118 dpi	Nelfinavir	100 µM	1 hour	45360484	43064595	0.949386	41753692	38603566	0.924555	23912482	1.239	266.39
	bp_f_nel_3	SRR19331764	B. pahangi	Adult	Female	118 dpi	Nelfinavir	100 µM	1 hour	38670528	36813337	0.951974	35692264	33059228	0.92623	20489750	1.24	267.09
	bp_f_nel_4	SRR19331763	B. pahangi	Adult	Female	118 dpi	Nelfinavir	100 µM	1 hour	39236748	37154342	0.946927	35963770	33387782	0.928373	20164958	1.208	265.56
	bp_f_rit_2	SRR19331762	B. pahangi	Adult	Female	118 dpi	Ritonavir	100 µM	1 hour	42256788	40014580	0.946939	38672532	35794070	0.925568	21184205	1.184	266.07
	bp_f_rit_3	SRR19331761	B. pahangi	Adult	Female	118 dpi	Ritonavir	100 µM	1 hour	36434582	34385089	0.943749	33258004	30836028	0.927176	18421990	1.195	265.48
	bp_f_rit_4	SRR19331760	B. pahangi	Adult	Female	118 dpi	Ritonavir	100 µM	1 hour	34468022	32680833	0.948149	31645940	29309314	0.926163	17921729	1.223	266.96

## Sheet: Supplementary table S3
	Supplementary Table S3: B. pahangi gene annotations, BLAST matches to B. malayi, raw read counts, and normalized gene expression levels (RNA-seq) for all genes.
			Functional annotation						Reciprocal Blast (B. pahangi vs B. malayi)									RAW READ COUNTS (FEATURECOUNTS)												NORMALIZED READ COUNTS												FPKM
	Gene Name	Length (bp)	IPR	GO	KEGG Pathway	KEGG	MEROPS		Gene ID	Reciprocal	Top Hit (Gene Name)	Top Hit (Symbol)	Top Hit (Description)	Evalue	Percent Identity	Alignment Length		DMSO 1	DMSO 2	DMSO 3	LOP 1	LOP 3	NEL 1	NEL 2	NEL 3	RIT 1	RIT 2	RIT 3		DMSO 1	DMSO 2	DMSO 3	LOP 1	LOP 3	NEL 1	NEL 2	NEL 3	RIT 1	RIT 2	RIT 3		DMSO 1	DMSO 2	DMSO 3	LOP 1	LOP 3	NEL 1	NEL 2	NEL 3
	BPAG_0000000001	2508	IPR007248: Mpv17/PMP22	GO:0016021 - CC - integral component of membrane	-	-	-		Bm9496	Y	WBGene00229757	Bm9496	-	0	94.7	685		1193	1477	1543	1414	1529	2203	1788	1746	1957	1656	1679		1351.87	1441.6	1530.5	1524.19	1747.94	1775.13	1690.23	1649.54	1749.38	1692.52	1796.6		39.4309	42.0918	45.5379	44.8187	52.0882	53.2826	50.564	49.7218
	BPAG_0000000101	2844	IPR001452: SH3 domain; IPR001478: PDZ domain; IPR004172: L27 domain; IPR008144: Guanylate kinase-like domain; IPR008145: Guanylate kinase/L-type calcium channel beta subunit; IPR015143: L27-1; IPR020590: Guanylate kinase, conserved site; IPR027417: P-loop containing nucleoside triphosphate hydrolase; IPR036028: SH3-like domain superfamily; IPR036034: PDZ superfamily; IPR036892: L27 domain superfa…	GO:0005515 - MF - protein binding	03036: Chromosome and associated proteins; 04390: Hippo signaling pathway; 04391: Hippo signaling pathway - fly; 04530: Tight junction; 04660: T cell receptor signaling pathway; 05165: Human papillomavirus infection; 05166: Human T-cell leukemia virus 1 infection; 05203: Viral carcinogenesis	K12076: disks large protein 1	-		Bm2372	Y	WBGene00222633	Bma-dlg-1	BMA-DLG-1 [Source:UniProtKB/TrEMBL;Acc:A0A0I9N4K6]	0	95.2	947		1794	2098	2270	2180	2304	3154	2656	2553	2944	2451	2446		2032.9	2047.72	2251.62	2349.88	2633.91	2541.42	2510.76	2411.96	2631.67	2505.05	2617.33		52.2898	52.7255	59.0786	60.9347	69.217	67.2714	66.2369	64.1137
	BPAG_0000000201	636	-	-	-	-	-		Bm9497	Y	WBGene00229758	Bm9497	-	8.2e-59	76.4	123		4	4	6	5	1	1	3	4	5	2	2		4.53267	3.90413	5.95141	5.38963	1.14319	0.805777	2.83595	3.77901	4.46955	2.04411	2.14009		0.521347	0.449519	0.698278	0.624957	0.134339	0.0953764	0.334554	0.449193
	BPAG_0000000301	861	IPR017452: GPCR, rhodopsin-like, 7TM; IPR019430: 7TM GPCR, serpentine receptor class x (Srx)	GO:0016021 - CC - integral component of membrane	-	-	-		Bm4872	Y	WBGene00225133	Bm4872	G_PROTEIN_RECEP_F1_2 domain-containing protein [Source:UniProtKB/TrEMBL;Acc:A0A4E9EXT2]	5.1e-154	79.9	294		8	18	9	13	10	18	9	16	15	16	8		9.06535	17.5686	8.92711	14.013	11.4319	14.504	8.50785	15.1161	13.4087	16.3529	8.56035		0.770213	1.49422	0.773702	1.20027	0.992331	1.26814	0.74138	1.32723
	BPAG_0000000401	795	-	-	-	-	-		Bm9498	Y	WBGene00229759	Bm9498	Bm9498 [Source:UniProtKB/TrEMBL;Acc:A0A0J9XRJ6]	7.6e-191	97	264		35	40	33	47	21	51	32	51	30	45	29		39.6609	39.0413	32.7328	50.6626	24.007	41.0946	30.2501	48.1824	26.8173	45.9924	31.0313		3.64943	3.59615	3.07242	4.69968	2.2569	3.89136	2.85486	4.58176
	BPAG_0000000501	270	-	-	-	-	-		Bm9499	Y	WBGene00229760	Bm9499	Bm9499 [Source:UniProtKB/TrEMBL;Acc:A0A0J9XRX4]	5.1e-61	97.8	89		2	6	2	1	3	9	2	3	3	3	5		2.26634	5.8562	1.9838	1.07793	3.42957	7.25199	1.89063	2.83426	2.68173	3.06616	5.35022		0.614031	1.5883	0.548278	0.294424	0.94933	2.02198	0.525373	0.793574
	BPAG_0000000601	240	IPR004171: cAMP-dependent protein kinase inhibitor	GO:0004862 - MF - cAMP-dependent protein kinase inhibitor activity; GO:0006469 - BP - negative regulation of protein kinase activity	-	-	-		Bm4960	Y	WBGene00225221	Bm4960	Bm4960 [Source:UniProtKB/TrEMBL;Acc:A0A0I9R2W3]	4.2e-51	98.7	79		264	316	297	280	306	438	345	313	402	324	304		299.157	308.426	294.595	301.819	349.816	352.93	326.134	295.708	359.352	331.145	325.293		91.1836	94.1067	91.5966	92.7437	108.936	110.703	101.955	93.1457
	BPAG_0000000701	459	IPR000608: Ubiquitin-conjugating enzyme E2; IPR016135: Ubiquitin-conjugating enzyme/RWD-like; IPR023313: Ubiquitin-conjugating enzyme, active site	-	03400: DNA repair and recombination proteins; 04120: Ubiquitin mediated proteolysis; 04121: Ubiquitin system; 04624: Toll and Imd signaling pathway; 05131: Shigellosis	K10580: ubiquitin-conjugating enzyme E2 N	-		Bm6825a	Y	WBGene00227086	Bma-ubc-13.1	UBIQUITIN_CONJUGAT_2 domain-containing protein [Source:UniProtKB/TrEMBL;Acc:A0A4E9F2I4]	7.3e-111	99.3	152		613	731	640	586	499	719	638	672	788	540	526		694.632	713.48	634.817	631.665	570.451	579.354	603.112	634.874	704.402	551.909	562.843		110.706	113.828	103.205	101.49	92.8854	95.0198	98.5848	104.565
	BPAG_0000000801	452	IPR001806: Small GTPase superfamily; IPR027417: P-loop containing nucleoside triphosphate hydrolase	GO:0003924 - MF - GTPase activity; GO:0005525 - MF - GTP binding	04031: GTP-binding proteins; 04131: Membrane trafficking; 04147: Exosome	K07893: Ras-related protein Rab-6A	-		Bm13660	Y	WBGene00233921	Bm13660	-	1.2e-70	99.1	109		956	1021	1085	1014	827	1268	1033	1069	1267	1030	883		1083.31	996.529	1076.21	1093.02	945.417	1021.73	976.513	1009.94	1132.59	1052.71	944.848		175.325	161.448	177.675	178.335	156.324	170.168	162.093	168.915
	BPAG_0000000901	1077	-	-	-	-	-		Bm9500	Y	WBGene00229761	Bm9500	Bm9500 [Source:UniProtKB/TrEMBL;Acc:A0A0K0JZI2]	1.1e-233	95.5	355		40	61	51	39	45	68	44	77	51	40	42		45.3267	59.538	50.587	42.0391	51.4435	54.7928	41.594	72.746	45.5895	40.8821	44.9418		3.07871	4.04817	3.50501	2.87863	3.5699	3.82993	2.8976	5.10628
	BPAG_0000001001	441	IPR001806: Small GTPase superfamily; IPR005225: Small GTP-binding protein domain; IPR027417: P-loop containing nucleoside triphosphate hydrolase	GO:0003924 - MF - GTPase activity; GO:0005525 - MF - GTP binding	-	-	-		Bm13660	N	WBGene00233921	Bm13660	-	1.7e-62	98.9	95		355	388	426	352	342	500	449	420	459	429	367		402.275	378.701	422.55	379.43	390.971	402.889	424.447	396.796	410.305	438.461	392.706		66.7289	62.8837	71.4999	63.4514	66.2594	68.7748	72.212	68.0206
	BPAG_0000001101	414	-	-	99982: Energy metabolism	K23490: -	-		Bm2497a	Y	WBGene00222758	Bma-cytb-5.1	BMA-CYTB-5.1, isoform c [Source:UniProtKB/TrEMBL;Acc:A0A1I9G1D8]	5.8e-84	93.5	139		131	151	150	125	131	145	148	171	174	124	114		148.445	147.381	148.785	134.741	149.758	116.838	139.907	161.553	155.541	126.735	121.985		26.2298	26.0688	26.8179	24.002	27.0353	21.2454	25.355	29.5002
	BPAG_0000001201	936	-	-	-	-	-		Bm384	Y	WBGene00220645	Bm384	-	1.5e-77	87.1	140		1303	1585	1429	1345	1270	1758	1428	1572	1408	1386	1360		1476.52	1547.01	1417.43	1449.81	1451.85	1416.56	1349.91	1485.15	1258.63	1416.57	1455.26		115.397	121.031	113.003	114.231	115.928	113.931	108.207	119.952
	BPAG_0000001301	855	IPR006214: Bax inhibitor 1-related	-	99997: Function unknown	K06890: NO DESCRIPTION	-		Bm1852	Y	WBGene00222113	Bma-tmbi-4	BMA-TMBI-4 [Source:UniProtKB/TrEMBL;Acc:A0A0I9N4X6]	9.6e-93	62.5	280		164	179	208	163	186	275	220	231	270	198	193		185.84	174.71	206.316	175.702	212.633	221.589	207.97	218.238	241.356	202.367	206.518		15.9002	14.9635	18.0066	15.1551	18.5869	19.5103	18.2498	19.2964
	BPAG_0000001401	1095	IPR002602: Domain of unknown function DB	-	-	-	-		Bm6916	Y	WBGene00227177	Bm6916	DB domain-containing protein [Source:UniProtKB/TrEMBL;Acc:A0A4E9EWN2]	1.4e-248	93.1	364		163	187	205	169	134	225	187	162	229	162	161		184.706	182.518	203.34	182.17	153.187	181.3	176.774	153.05	204.706	165.573	172.277		12.3395	12.206	13.8572	12.269	10.4556	12.4643	12.1124	10.5665
	BPAG_0000001501	123	-	-	-	-	-		Bm8414a	N	WBGene00228675	Bm8414	Bm8414, isoform a; Bm8414, isoform b [Source:UniProtKB/TrEMBL;Acc:A0A0R3RF53]	2.2e-09	42.5	80		4	1	3	2	0	2	1	2	2	0	1		4.53267	0.976033	2.9757	2.15585	0	1.61155	0.945317	1.88951	1.78782	0	1.07004		2.69575	0.581085	1.8053	1.29259	0	0.986332	0.576629	1.16133
	BPAG_0000001601	618	-	-	-	-	-		Bm9501	Y	WBGene00229762	Bm9501	-	2.3e-80	66.8	205		17	23	19	17	14	17	10	21	21	24	19		19.2639	22.4487	18.8461	18.3248	16.0046	13.6982	9.45317	19.8398	18.7721	24.5293	20.3308		2.28026	2.66002	2.27562	2.18674	1.93553	1.66862	1.14766	2.42695
	BPAG_0000001701	1497	IPR003316: E2F/DP family, winged-helix DNA-binding domain; IPR014889: Transcription factor DP, C-terminal; IPR015648: Transcription factor DP; IPR036388: Winged helix-like DNA-binding domain superfamily; IPR036390: Winged helix DNA-binding domain superfamily; IPR037241: E2F-DP heterodimerization region; IPR038168: Transcription factor DP, C-terminal domain superfamily	GO:0003700 - MF - transcription factor activity, sequence-specific DNA binding; GO:0005667 - CC - transcription factor complex; GO:0006355 - BP - regulation of transcription, DNA-templated; GO:0007049 - BP - cell cycle	03000: Transcription factors; 04110: Cell cycle; 04350: TGF-beta signaling pathway	K04683: transcription factor Dp-1	-		Bm5962a	Y	WBGene00226223	Bma-dpl-1	DP domain-containing protein [Source:UniProtKB/TrEMBL;Acc:A0A4E9EYZ2]	9.2e-314	92	498		3514	4078	3968	3951	3448	4927	4359	4254	4513	4085	3695		3981.95	3980.26	3935.87	4258.89	3941.72	3970.06	4120.64	4018.98	4034.22	4175.09	3953.81		194.583	194.702	196.193	209.808	196.791	199.645	206.522	202.958
	BPAG_0000001801	267	-	-	-	-	-		Bm9502a	N	WBGene00229763	Bma-hsp-43	BMA-HSP-43, isoform b; Bm9502 [Source:UniProtKB/TrEMBL;Acc:A0A1P6CG28]	5e-31	100	47		162	147	166	148	150	178	200	170	142	148	157		183.573	143.477	164.656	159.533	171.478	143.428	189.063	160.608	126.935	151.264	167.997		50.2954	39.3506	46.0183	44.0644	47.9998	40.4396	53.1276	45.4744
	BPAG_0000001901	951	-	-	-	-	-		Bm9502a	Y	WBGene00229763	Bma-hsp-43	BMA-HSP-43, isoform b; Bm9502 [Source:UniProtKB/TrEMBL;Acc:A0A1P6CG28]	3.4e-207	94.2	310		2493	2836	3019	2329	2133	2872	2733	2436	2425	2001	2305		2824.99	2768.03	2994.55	2510.49	2438.42	2314.19	2583.55	2301.42	2167.73	2045.13	2466.45		217.303	213.143	234.972	194.682	191.633	183.19	203.827	182.948
	BPAG_0000002001	1413	IPR022226: Protein of unknown function DUF3752	-	-	-	-		Bm9503	Y	WBGene00229764	Bm9503	Bm9503 [Source:UniProtKB/TrEMBL;Acc:A0A1U7F4B7]	0	98.5	470		2503	2868	2744	2621	2386	3441	2884	2852	3171	2757	2552		2836.32	2799.26	2721.78	2825.25	2727.65	2772.68	2726.29	2694.44	2834.59	2817.8	2730.75		146.84	145.071	143.74	147.456	144.274	147.72	144.762	144.157
	BPAG_0000002101	1680	IPR000719: Protein kinase domain; IPR011009: Protein kinase-like domain superfamily; IPR011524: SARAH domain; IPR017441: Protein kinase, ATP binding site; IPR024205: Mst1 SARAH domain	GO:0004672 - MF - protein kinase activity; GO:0004674 - MF - protein serine/threonine kinase activity; GO:0005524 - MF - ATP binding; GO:0006468 - BP - protein phosphorylation; GO:0007165 - BP - signal transduction	01001: Protein kinases; 04010: MAPK signaling pathway; 04214: Apoptosis - fly; 04390: Hippo signaling pathway; 04391: Hippo signaling pathway - fly; 04392: Hippo signaling pathway - multiple species	K04412: serine/threonine kinase 3	-		Bm3378a	Y	WBGene00223639	Bm3378	Bm3378, isoform a; Bm3378, isoform b [Source:UniProtKB/TrEMBL;Acc:A0A0K0JA06]	0	96.4	559		1730	1875	2009	1992	2182	2914	2524	2583	2785	2454	2428		1960.38	1830.06	1992.73	2147.23	2494.44	2348.03	2385.98	2440.3	2489.54	2508.12	2598.06		85.3613	79.7695	88.5126	94.2578	110.97	105.215	106.557	109.811
	BPAG_0000002201	777	-	-	-	-	-		Bm9504	Y	WBGene00229765	Bm9504	BMA-DPY-8 [Source:UniProtKB/TrEMBL;Acc:A0A0K0JZI6]	5.7e-26	94.2	240		25	38	29	36	16	26	20	24	20	34	17		28.3292	37.0892	28.7651	38.8054	18.291	20.9502	18.9063	22.6741	17.8782	34.7498	18.1907		2.66712	3.49548	2.76256	3.68315	1.75938	2.02979	1.82562	2.20607
	BPAG_0000002301	288	-	-	-	-	-		-	-	-	-	-	-	-	-		0	6	7	4	11	6	4	2	4	2	5		0	5.8562	6.94331	4.31171	12.5751	4.83466	3.78127	1.88951	3.57564	2.04411	5.35022		0	1.48903	1.79904	1.10409	3.26332	1.26374	0.985075	0.495984
	BPAG_0000002401	1461	IPR000536: Nuclear hormone receptor, ligand-binding domain; IPR001628: Zinc finger, nuclear hormone receptor-type; IPR001723: Nuclear hormone receptor; IPR013088: Zinc finger, NHR/GATA-type; IPR035500: Nuclear hormone receptor-like domain superfamily	GO:0003677 - MF - DNA binding; GO:0003700 - MF - transcription factor activity, sequence-specific DNA binding; GO:0003707 - MF - steroid hormone receptor activity; GO:0005634 - CC - nucleus; GO:0006355 - BP - regulation of transcription, DNA-templated; GO:0008270 - MF - zinc ion binding; GO:0043401 - BP - steroid hormone mediated signaling pathway; GO:0043565 - MF - sequence-specific DNA binding	03000: Transcription factors; 03310: Nuclear receptors	K08546: nuclear receptor subfamily 2 group E member 3	-		Bm4485a	Y	WBGene00224746	Bma-fax-1	Bm4485 [Source:UniProtKB/TrEMBL;Acc:A0A0J9XSH8]	0	98.4	490		78	90	118	71	90	122	119	87	84	91	64		88.3871	87.8429	117.044	76.5328	102.887	98.3048	112.493	82.1935	75.0885	93.0069	68.4828		4.42556	4.40288	5.97814	3.86319	5.26323	5.06533	5.77695	4.25303
	BPAG_0000002501	9528	-	GO:0005515 - MF - protein binding	04131: Membrane trafficking	K22937: -	-		Bm9505	Y	WBGene00229766	Bma-lyst-1	Bm9505 [Source:UniProtKB/TrEMBL;Acc:A0A0K0JZI7]	0	92.4	3091		1799	2317	2236	2051	2104	2863	2514	2454	2442	2146	2247		2038.57	2261.47	2217.89	2210.83	2405.27	2306.94	2376.53	2318.42	2182.93	2193.33	2404.39		15.6514	17.3808	17.3702	17.112	18.867	18.2271	18.7139	18.3951
	BPAG_0000002601	237	-	-	-	-	-		-	-	-	-	-	-	-	-		43	23	38	23	21	45	29	25	34	29	33		48.7262	22.4487	37.6923	24.7923	24.007	36.26	27.4142	23.6188	30.393	29.6395	35.3114		15.0399	6.93624	11.8678	7.71466	7.57061	11.5176	8.67863	7.53393
	BPAG_0000002701	1479	-	GO:0046872 - MF - metal ion binding	03041: Spliceosome	K14943: muscleblind	-		Bm4775a	Y	WBGene00225036	Bma-mbl-1	-	3.5e-122	81.6	446		829	957	1005	904	898	1193	1014	1007	1215	938	860		939.397	934.063	996.861	974.446	1026.58	961.292	958.552	951.367	1086.1	958.686	920.237		46.4634	46.2475	50.2958	48.589	51.8762	48.9294	48.6263	48.6285
	BPAG_0000002801	753	-	-	-	-	-		Bm4403	Y	WBGene00224664	Bm4403	-	6.5e-185	97.6	250		475	505	547	545	497	714	556	659	738	593	623		538.255	492.896	542.57	587.47	568.165	575.325	525.596	622.592	659.706	606.078	666.637		52.2905	47.9337	53.7683	57.5359	56.3925	57.5177	52.3699	62.5058
	BPAG_0000002901	1452	-	-	-	-	-		Bm4603a	Y	WBGene00224864	Bm4603	Bm4603, isoform b [Source:UniProtKB/TrEMBL;Acc:A0A0J9XRL2]	1.1e-272	95	441		373	416	495	445	435	618	507	536	486	442	500		422.672	406.03	490.991	479.677	497.287	497.97	479.276	506.388	434.441	451.748	535.022		21.2945	20.4772	25.2332	24.363	25.5966	25.8178	24.7653	26.365
	BPAG_0000003001	384	-	-	-	-	-		Bm7214	Y	WBGene00227475	Bm7214	Bm7214 [Source:UniProtKB/TrEMBL;Acc:A0A0J9XRZ5]	5.1e-90	97.6	127		65	83	83	74	76	85	58	62	62	53	69		73.656	81.0107	82.3278	79.7666	86.8824	68.4911	54.8284	58.5747	55.4225	54.1688	73.833		14.0316	15.4487	15.9986	15.3193	16.9099	13.4272	10.7127	11.5316
	BPAG_0000003101	1554	IPR018790: Protein of unknown function DUF2358	-	-	-	-		Bm2426	Y	WBGene00222687	Bm2426	-	2.1e-319	86.4	515		1191	1448	1331	1224	1087	1579	1333	1411	1528	1262	1228		1349.6	1413.3	1320.22	1319.38	1242.65	1272.32	1260.11	1333.05	1365.9	1289.83	1314.01		63.5309	66.5982	63.3959	62.6135	59.7638	61.6353	60.8388	64.8494
	BPAG_0000003201	1461	IPR038459: tRNA methyltransferase TRM10-type domain superfamily	-	-	-	-		Bm9506	Y	WBGene00229767	Bm9506	-	0	96.3	463		966	1009	1073	926	875	1173	1042	944	986	823	853		1094.64	984.817	1064.31	998.16	1000.29	945.177	985.02	891.847	881.396	841.15	912.747		54.8089	49.3612	54.3605	50.3846	51.1703	48.7019	50.5847	46.1479
	BPAG_0000003301	999	IPR004843: Calcineurin-like phosphoesterase domain, ApaH type; IPR006186: Serine/threonine-specific protein phosphatase/bis(5-nucleosyl)-tetraphosphatase; IPR029052: Metallo-dependent phosphatase-like; IPR031675: Serine-threonine protein phosphatase, N-terminal	GO:0016787 - MF - hydrolase activity	01009: Protein phosphatases and associated proteins; 03015: mRNA surveillance pathway; 03019: Messenger RNA biogenesis; 03021: Transcription machinery; 03041: Spliceosome; 04022: cGMP-PKG signaling pathway; 04024: cAMP signaling pathway; 04113: Meiosis - yeast; 04114: Oocyte meiosis; 04218: Cellular senescence; 04261: Adrenergic signaling in cardiomyocytes; 04270: Vascular smooth muscle contracti…	K06269: serine/threonine-protein phosphatase PP1 catalytic subunit	-		Bm2117a	Y	WBGene00222378	Bm2117	Serine/threonine-protein phosphatase [Source:UniProtKB/TrEMBL;Acc:A0A4E9EZ12]	1.6e-232	97.5	315		44	51	51	35	66	56	49	54	57	53	62		49.8594	49.7777	50.587	37.7274	75.4505	45.1235	46.3205	51.0167	50.9529	54.1688	66.3427		3.651	3.6488	3.77867	2.78509	5.64467	3.40033	3.47882	3.86063
	BPAG_0000003401	885	-	-	99980: Enzymes with EC numbers	K19176: -	-		Bm6759	Y	WBGene00227020	Bm6759	Amidase domain-containing protein [Source:UniProtKB/TrEMBL;Acc:A0A4E9FU82]	3.6e-184	88.1	294		957	1052	1073	912	849	1298	1066	1134	1189	1001	936		1084.44	1026.79	1064.31	983.069	970.567	1045.9	1007.71	1071.35	1062.86	1023.08	1001.56		89.6382	84.9606	89.7409	81.9198	81.9642	88.9671	85.431	91.5165
	BPAG_0000003501	3642	-	GO:0005515 - MF - protein binding; GO:0046872 - MF - metal ion binding	04131: Membrane trafficking	K20129: -	-		Bm3530	Y	WBGene00223791	Bm3530	-	0	96.8	1099		2343	2643	2671	2338	2436	3357	2841	2923	2326	2509	2482		2655.01	2579.65	2649.37	2520.19	2784.81	2704.99	2685.65	2761.51	2079.24	2564.33	2655.85		53.3282	51.8683	54.2835	51.0319	57.1475	55.9126	55.3265	57.3216
	BPAG_0000003601	1260	-	GO:0005921 - CC - gap junction	02000: Transporters	K22037: -	-		Bm1025	Y	WBGene00221286	Bm1025	Innexin [Source:UniProtKB/TrEMBL;Acc:A0A5K1U718]	5.1e-292	93.9	423		276	331	305	270	251	360	306	296	304	319	299		312.755	323.067	302.53	291.04	286.94	290.08	289.267	279.647	271.749	326.035	319.943		18.1578	18.776	17.9169	17.0346	17.0201	17.3313	17.2247	16.7784
	BPAG_0000003701	6663	-	GO:0005524 - MF - ATP binding; GO:0016887 - MF - ATPase activity	02000: Transporters; 02010: ABC transporters; 04975: Fat digestion and absorption; 04979: Cholesterol metabolism	K05641: ATP-binding cassette, subfamily A (ABC1), member 1	-		Bm3319	Y	WBGene00223580	Bma-abt-2	BMA-ABT-2 [Source:UniProtKB/TrEMBL;Acc:A0A0I9R397]	0	97.4	2232		1120	1236	1234	1024	1374	1897	1377	1422	1260	1367	1344		1269.15	1206.38	1224.01	1103.8	1570.74	1528.56	1301.7	1343.44	1126.33	1397.15	1438.14		13.9339	13.2585	13.7082	12.2171	17.6188	17.2701	14.6577	15.2426
	BPAG_0000003801	363	-	-	-	-	-		-	-	-	-	-	-	-	-		37	57	54	54	48	67	62	72	85	65	38		41.9272	55.6339	53.5627	58.208	54.8731	53.9871	58.6097	68.0222	75.9824	66.4335	40.6616		8.44927	11.2231	11.0109	11.8256	11.2978	11.1961	12.114	14.1663
	BPAG_0000003901	456	-	GO:0003723 - MF - RNA binding; GO:0003735 - MF - structural constituent of ribosome; GO:0005840 - CC - ribosome; GO:0006412 - BP - translation; GO:0015935 - CC - small ribosomal subunit	03010: Ribosome; 03011: Ribosome	K02958: small subunit ribosomal protein S15e	-		Bm13783	Y	WBGene00234044	Bma-rps-15	BMA-RPS-15 [Source:UniProtKB/TrEMBL;Acc:A0A0J9Y5J8]	8.6e-105	100	151		5463	6356	6136	5473	4331	6045	5544	5467	5940	4653	4381		6190.5	6203.66	6086.31	5899.49	4951.15	4870.92	5240.84	5164.97	5309.83	4755.61	4687.86		993.095	996.24	995.989	954.109	811.49	804.136	862.304	856.276
	BPAG_0000004001	1014	IPR002843: ATPase, V0 complex, c/d subunit; IPR016727: ATPase, V0 complex, subunit d; IPR035067: V-type ATPase subunit c; IPR036079: V-type ATP synthase subunit C-like	GO:0015078 - MF - hydrogen ion transmembrane transporter activity; GO:0015991 - BP - ATP hydrolysis coupled proton transport; GO:0033179 - CC - proton-transporting V-type ATPase, V0 domain	00190: Oxidative phosphorylation; 04142: Lysosome; 04145: Phagosome; 04721: Synaptic vesicle cycle; 04966: Collecting duct acid secretion; 05110: Vibrio cholerae infection; 05120: Epithelial cell signaling in Helicobacter pylori infection; 05152: Tuberculosis; 05165: Human papillomavirus infection; 05203: Viral carcinogenesis; 05323: Rheumatoid arthritis	K02146: V-type H+-transporting ATPase subunit d	-		Bm14003a	Y	WBGene00234264	Bma-vha-16	V-type proton ATPase subunit [Source:UniProtKB/TrEMBL;Acc:A0A5S6PB49]	3.7e-210	85.9	348		3266	3653	3546	3455	3102	4340	3633	3595	4370	3524	3274		3700.93	3565.45	3517.28	3724.24	3546.17	3497.07	3434.34	3396.39	3906.39	3601.72	3503.32		266.995	257.488	258.842	270.862	261.375	259.627	254.114	253.216
	BPAG_0000004101	2682	IPR000299: FERM domain; IPR000719: Protein kinase domain; IPR001245: Serine-threonine/tyrosine-protein kinase, catalytic domain; IPR005189: Focal adhesion kinase, targeting (FAT) domain; IPR008266: Tyrosine-protein kinase, active site; IPR011009: Protein kinase-like domain superfamily; IPR011993: PH-like domain superfamily; IPR014352: FERM/acyl-CoA-binding protein superfamily; IPR017441: Protein …	GO:0004672 - MF - protein kinase activity; GO:0004713 - MF - protein tyrosine kinase activity; GO:0004871 - MF - signal transducer activity; GO:0005524 - MF - ATP binding; GO:0005856 - CC - cytoskeleton; GO:0005925 - CC - focal adhesion; GO:0006468 - BP - protein phosphorylation; GO:0007172 - BP - signal complex assembly	01001: Protein kinases; 01009: Protein phosphatases and associated proteins; 01522: Endocrine resistance; 04012: ErbB signaling pathway; 04062: Chemokine signaling pathway; 04151: PI3K-Akt signaling pathway; 04360: Axon guidance; 04370: VEGF signaling pathway; 04510: Focal adhesion; 04670: Leukocyte transendothelial migration; 04810: Regulation of actin cytoskeleton; 04935: Growth hormone synthes…	K05725: focal adhesion kinase 1	-		Bm2486b	Y	WBGene00222747	Bma-kin-32	BMA-KIN-32, isoform i [Source:UniProtKB/TrEMBL;Acc:A0A5S6PHK9]	0	98.2	893		1210	1348	1372	1257	1254	1779	1371	1447	1433	1331	1272		1371.13	1315.69	1360.89	1354.95	1433.56	1433.48	1296.03	1367.06	1280.97	1360.35	1361.09		37.3982	35.9233	37.8643	37.2575	39.9483	40.236	36.256	38.5336
	BPAG_0000004201	2115	-	GO:0008152 - BP - metabolic process; GO:0016491 - MF - oxidoreductase activity	-	-	-		Bm3483	Y	WBGene00223744	Bm3483	Bm3483 [Source:UniProtKB/TrEMBL;Acc:A0A0I9N9E9]	0	99	704		640	593	520	512	578	712	704	542	499	405	449		725.228	578.787	515.789	551.898	660.763	573.713	665.503	512.056	446.062	413.932	480.449		25.0838	20.0396	18.1981	19.2441	23.3495	20.4206	23.6083	18.3028
	BPAG_0000004301	2232	-	GO:0008152 - BP - metabolic process; GO:0016491 - MF - oxidoreductase activity	-	-	-		Bm12856	Y	WBGene00233117	Bm12856	Bm12856, isoform c [Source:UniProtKB/TrEMBL;Acc:A0A5S6P9F5]	0	93.4	757		198	210	209	149	169	263	254	214	212	198	191		224.367	204.967	207.307	160.611	193.199	211.919	240.111	202.177	189.509	202.367	204.378		7.35352	6.72465	6.93085	5.30676	6.46923	7.14759	8.07126	6.84777
	BPAG_0000004401	216	-	-	-	-	-		-	-	-	-	-	-	-	-		38	27	33	19	14	41	26	27	26	28	20		43.0604	26.3529	32.7328	20.4806	16.0046	33.0369	24.5782	25.5083	23.2417	28.6175	21.4009		14.5832	8.93418	11.3082	6.99258	5.53776	11.5141	8.53732	8.9277
	BPAG_0000004501	1971	IPR001627: Sema domain; IPR015943: WD40/YVTN repeat-like-containing domain superfamily; IPR036352: Sema domain superfamily	GO:0005515 - MF - protein binding	-	-	-		Bm7060	Y	WBGene00227321	Bma-mab-20	Sema domain-containing protein [Source:UniProtKB/TrEMBL;Acc:A0A4E9FU99]	0	97	626		3941	4745	4308	4170	3758	5461	4609	4266	5178	4491	3722		4465.82	4631.27	4273.11	4494.95	4296.1	4400.35	4356.97	4030.32	4628.67	4590.04	3982.7		165.746	172.066	161.779	168.185	162.903	168.067	165.852	154.584
	BPAG_0000004601	684	-	-	-	-	-		Bm12857	Y	WBGene00233118	Bm12857	Bm12857 [Source:UniProtKB/TrEMBL;Acc:A0A0J9Y4I4]	2.3e-150	97.8	227		1580	1834	1932	1751	1623	2341	2030	1873	1906	1696	1578		1790.41	1790.04	1916.35	1887.45	1855.4	1886.32	1918.99	1769.52	1703.79	1733.4	1688.53		191.481	191.641	209.067	203.501	202.732	207.608	210.495	195.574
	BPAG_0000004701	2487	IPR001375: Peptidase S9, prolyl oligopeptidase, catalytic domain; IPR002469: Dipeptidylpeptidase IV, N-terminal domain; IPR029058: Alpha/Beta hydrolase fold; IPR038554: Dipeptidylpeptidase IV, N-terminal domain superfamily	GO:0006508 - BP - proteolysis; GO:0008236 - MF - serine-type peptidase activity	-	-	S09B		Bm5952a	Y	WBGene00226213	Bm5952	BMA-DPF-1 [Source:UniProtKB/TrEMBL;Acc:A0A5S6PR92]	0	88.8	834		801	899	919	736	744	1101	950	914	859	788	763		907.668	877.453	911.558	793.354	850.532	887.161	898.051	863.505	767.869	805.378	816.443		26.6981	25.8362	27.351	23.5255	25.5598	26.854	27.0925	26.2482
	BPAG_0000004801	5022	-	GO:0003676 - MF - nucleic acid binding; GO:0007165 - BP - signal transduction; GO:0046856 - BP - phosphatidylinositol dephosphorylation	00562: Inositol phosphate metabolism; 04070: Phosphatidylinositol signaling system; 04131: Membrane trafficking	K01099: phosphatidylinositol-bisphosphatase	-		Bm2243	Y	WBGene00222504	Bma-ocrl-1.1	IPPc domain-containing protein [Source:UniProtKB/TrEMBL;Acc:A0A4E9FIY4]	0	96.2	716		4768	6094	5584	5098	4747	6641	5937	5916	6749	5241	5025		5402.95	5947.94	5538.78	5495.27	5426.72	5351.17	5612.35	5589.16	6033	5356.58	5376.97		78.7016	86.7302	82.3006	80.6976	80.7611	80.2149	83.8479	84.1359
	BPAG_0000004901	1161	IPR005607: BSD domain; IPR035925: BSD domain superfamily	-	-	-	-		Bm2244	Y	WBGene00222505	Bm2244	BSD domain-containing protein [Source:UniProtKB/TrEMBL;Acc:A0A4E9FMU9]	3.7e-253	98.7	379		1044	1280	1232	1100	999	1332	1280	1350	1374	1055	1100		1183.03	1249.32	1222.02	1185.72	1142.05	1073.3	1210.01	1275.42	1228.23	1078.27	1177.05		74.5405	78.7993	78.5439	75.3179	73.5179	69.5937	78.1951	83.0484
	BPAG_0000005001	723	IPR031947: Headcase, middle domain	-	99994: Others	K23049: -	-		Bm4848	Y	WBGene00225109	Bma-cri-1	BMA-CRI-1 [Source:UniProtKB/TrEMBL;Acc:A0A0I9R3B3]	4e-163	98.2	221		347	469	437	397	337	521	421	472	547	537	463		393.209	457.759	433.461	427.937	385.255	419.81	397.979	445.924	488.969	548.843	495.43		39.7846	46.3638	44.7381	43.6505	39.8246	43.7117	41.2996	46.6266
	BPAG_0000005101	225	-	-	-	-	-		-	-	-	-	-	-	-	-		0	0	3	1	4	0	1	1	0	0	0		0	0	2.9757	1.07793	4.57276	0	0.945317	0.944753	0	0	0		0	0	0.9869	0.353309	1.51893	0	0.315224	0.317429
	BPAG_0000005201	627	-	-	-	-	-		Bm12860a	N	WBGene00233121	Bma-lim-7	BMA-LIM-7, isoform z [Source:UniProtKB/TrEMBL;Acc:A0A1P6BKA7]	1.8e-17	95.3	43		188	196	177	168	158	215	205	188	206	158	189		213.036	191.302	175.567	181.092	180.624	173.242	193.79	177.614	184.146	161.484	202.238		24.855	22.3426	20.8949	21.3	21.5303	20.8003	23.1893	21.4151
	BPAG_0000005301	594	IPR001356: Homeobox domain; IPR001781: Zinc finger, LIM-type; IPR009057: Homeobox-like domain superfamily; IPR017970: Homeobox, conserved site	GO:0003677 - MF - DNA binding; GO:0006355 - BP - regulation of transcription, DNA-templated; GO:0043565 - MF - sequence-specific DNA binding	03000: Transcription factors; 04550: Signaling pathways regulating pluripotency of stem cells	K09370: insulin gene enhancer protein ISL-1	-		Bm12860a	Y	WBGene00233121	Bma-lim-7	BMA-LIM-7, isoform z [Source:UniProtKB/TrEMBL;Acc:A0A1P6BKA7]	6.6e-128	89.9	208		236	288	281	282	229	338	295	252	247	241	221		267.428	281.097	278.724	303.975	261.79	272.353	278.869	238.078	220.796	246.315	236.48		32.9344	34.6538	35.015	37.7398	32.9389	34.5166	35.2239	30.3001
	BPAG_0000005401	426	-	-	-	-	-		Bm12860a	N	WBGene00233121	Bma-lim-7	BMA-LIM-7, isoform z [Source:UniProtKB/TrEMBL;Acc:A0A1P6BKA7]	5.8e-94	98.6	140		301	370	309	276	232	366	284	274	256	213	212		341.084	361.132	306.498	297.508	265.22	294.914	268.47	258.862	228.841	217.697	226.849		58.5708	62.0779	53.6887	51.5035	46.5305	52.1158	47.2836	45.9379
	BPAG_0000005501	984	IPR001680: WD40 repeat; IPR015943: WD40/YVTN repeat-like-containing domain superfamily; IPR017986: WD40-repeat-containing domain; IPR027525: Eukaryotic translation initiation factor 3 subunit I; IPR036322: WD40-repeat-containing domain superfamily	GO:0003743 - MF - translation initiation factor activity; GO:0005515 - MF - protein binding; GO:0005737 - CC - cytoplasm; GO:0005852 - CC - eukaryotic translation initiation factor 3 complex	03012: Translation factors; 03013: RNA transport	K03246: translation initiation factor 3 subunit I	-		Bm7127	Y	WBGene00227388	Bma-eif-3.I	Eukaryotic translation initiation factor 3 subunit I [Source:UniProtKB/Swiss-Prot;Acc:A8QBF3]	4.3e-249	99.7	327		2000	2251	2146	1957	1824	2486	2124	2024	2233	1862	1878		2266.34	2197.05	2128.62	2109.5	2085.18	2003.16	2007.85	1912.18	1996.1	1903.06	2009.54		168.484	163.503	161.424	158.1	158.376	153.251	153.095	146.908
	BPAG_0000005601	1362	-	-	03041: Spliceosome	K13169: splicing factor, arginine/serine-rich 17	-		Bm2060a	Y	WBGene00222321	Bma-cux-7	BMA-CUX-7, isoform b [Source:UniProtKB/TrEMBL;Acc:A0A5S6PGB3]	1.3e-299	96.5	453		2490	2973	2755	2535	2235	3114	2837	2717	2821	2483	2373		2821.59	2901.74	2732.69	2732.54	2555.03	2509.19	2681.86	2566.89	2521.72	2537.76	2539.21		151.547	156.014	149.72	147.958	140.204	138.688	147.735	142.476
	BPAG_0000005701	1404	IPR009060: UBA-like superfamily; IPR009816: Protein of unknown function DUF1387	GO:0005515 - MF - protein binding	-	-	-		Bm7032	Y	WBGene00227293	Bm7032	Bm7032 [Source:UniProtKB/TrEMBL;Acc:A0A0I9R3E0]	8.2e-314	97.2	467		1893	1996	2208	2234	2157	3085	2592	2591	2745	2497	2368		2145.09	1948.16	2190.12	2408.09	2465.86	2485.82	2450.26	2447.86	2453.79	2552.07	2533.86		111.765	101.61	116.404	126.489	131.263	133.286	130.939	131.804
	BPAG_0000005801	1278	-	GO:0003676 - MF - nucleic acid binding; GO:0003723 - MF - RNA binding	03040: Spliceosome; 03041: Spliceosome; 05203: Viral carcinogenesis; 05206: MicroRNAs in cancer	K12886: heterogeneous nuclear ribonucleoprotein K	-		Bm12863	Y	WBGene00233124	Bma-hrpk-1.1	Bm12863 [Source:UniProtKB/TrEMBL;Acc:A0A0I9R3F8]	2.2e-242	98.8	339		3245	3734	3531	3046	2734	4152	3374	3058	3775	3092	2795		3677.13	3644.51	3502.4	3283.36	3125.48	3345.59	3189.5	2889.06	3374.51	3160.19	2990.77		210.479	208.828	204.504	189.468	182.779	197.072	187.247	170.898
	BPAG_0000005901	1248	-	GO:0006629 - BP - lipid metabolic process; GO:0008374 - MF - O-acyltransferase activity	00564: Glycerophospholipid metabolism; 04142: Lysosome	K06129: lysophospholipase III	-		Bm5102	Y	WBGene00225363	Bm5102	Bm5102 [Source:UniProtKB/TrEMBL;Acc:A0A0I9N793]	0	98.7	398		699	709	701	607	578	788	632	635	681	583	549		792.085	692.007	695.323	654.301	660.763	634.952	597.44	599.918	608.753	595.857	587.454		46.4287	40.6047	41.5755	38.6644	39.5706	38.301	35.9173	36.3403
	BPAG_0000006001	741	IPR016024: Armadillo-type fold	GO:0005488 - MF - binding	-	-	-		Bm7186	N	WBGene00227447	Bm7186	DUF2428 domain-containing protein [Source:UniProtKB/TrEMBL;Acc:A0A4E9FUB7]	2.7e-144	96.4	225		879	1068	1001	934	776	1186	1015	991	1087	981	981		996.055	1042.4	992.894	1006.78	887.115	955.652	959.497	936.251	971.681	1002.63	1049.71		98.332	103.014	99.9885	100.2	89.4753	97.0878	97.1515	95.518
	BPAG_0000006101	1881	-	-	04131: Membrane trafficking; 04514: Cell adhesion molecules (CAMs)	K07378: neuroligin	S09X		Bm5445	Y	WBGene00225706	Bma-cest-19	COesterase domain-containing protein [Source:UniProtKB/TrEMBL;Acc:A0A4E9EXR2]	0	92.4	633		643	815	835	721	821	1011	916	839	818	748	749		728.627	795.467	828.238	777.185	938.558	814.641	865.91	792.648	731.219	764.496	801.462		28.3365	30.968	32.8573	30.4708	37.2919	32.6032	34.5389	31.8569
	BPAG_0000006201	651	-	-	-	-	-		Bm9923	Y	WBGene00230184	Bm9923	Bm9923 [Source:UniProtKB/TrEMBL;Acc:A0A0K0K0Z2]	1e-155	97.2	216		242	280	280	199	229	270	266	301	267	192	249		274.227	273.289	277.732	214.507	261.79	217.56	251.454	284.371	238.674	196.234	266.441		30.8147	30.7413	31.8355	24.3002	30.0548	25.1583	28.9803	33.0229
	BPAG_0000006301	1581	-	-	-	-	-		Bm9924	Y	WBGene00230185	Bm9924	Bm9924 [Source:UniProtKB/TrEMBL;Acc:A0A0J9XUI9]	0	94.9	526		356	457	452	345	352	552	428	431	487	481	426		403.408	446.047	448.34	371.885	402.402	444.789	404.596	407.189	435.335	491.608	455.838		18.6656	20.6599	21.1612	17.347	19.0226	21.179	19.2006	19.4704
	BPAG_0000006401	480	IPR001628: Zinc finger, nuclear hormone receptor-type; IPR013088: Zinc finger, NHR/GATA-type	GO:0003700 - MF - transcription factor activity, sequence-specific DNA binding; GO:0005634 - CC - nucleus; GO:0006355 - BP - regulation of transcription, DNA-templated; GO:0008270 - MF - zinc ion binding; GO:0043565 - MF - sequence-specific DNA binding	-	-	-		Bm3303	N	WBGene00223564	Bma-nhr-25.2	Bm3303 [Source:UniProtKB/TrEMBL;Acc:A0A0J9XUC5]	1.2e-63	97.9	94		163	152	152	169	155	204	164	150	192	151	121		184.706	148.357	150.769	182.17	177.194	164.379	155.032	141.713	171.631	154.33	129.475		28.1495	22.6333	23.4389	27.9887	27.5899	25.7802	24.2328	22.3193
	BPAG_0000006501	1383	IPR000536: Nuclear hormone receptor, ligand-binding domain; IPR001723: Nuclear hormone receptor; IPR035500: Nuclear hormone receptor-like domain superfamily	GO:0003677 - MF - DNA binding; GO:0003707 - MF - steroid hormone receptor activity; GO:0005634 - CC - nucleus; GO:0006355 - BP - regulation of transcription, DNA-templated; GO:0043401 - BP - steroid hormone mediated signaling pathway	03000: Transcription factors; 03310: Nuclear receptors; 04950: Maturity onset diabetes of the young	K08027: nuclear receptor subfamily 5 group A member 2	-		Bm3303	Y	WBGene00223564	Bma-nhr-25.2	Bm3303 [Source:UniProtKB/TrEMBL;Acc:A0A0J9XUC5]	0	99.8	460		845	1036	901	940	909	1194	1018	897	1039	951	788		957.527	1011.17	893.703	1013.25	1039.16	962.098	962.333	847.444	928.773	971.973	843.194		50.6476	53.5405	48.2211	54.031	56.1567	52.3697	52.2068	46.3234
	BPAG_0000006601	1047	IPR000276: G protein-coupled receptor, rhodopsin-like; IPR000611: Neuropeptide Y receptor family; IPR017452: GPCR, rhodopsin-like, 7TM	GO:0004930 - MF - G-protein coupled receptor activity; GO:0004983 - MF - neuropeptide Y receptor activity; GO:0007186 - BP - G-protein coupled receptor signaling pathway; GO:0016021 - CC - integral component of membrane	04030: G protein-coupled receptors	K04209: neuropeptide Y receptor, invertebrate	-		Bm2909	Y	WBGene00223170	Bma-npr-10	G_PROTEIN_RECEP_F1_2 domain-containing protein [Source:UniProtKB/TrEMBL;Acc:A0A4E9F405]	1.2e-135	96.6	208		9	25	17	22	23	26	12	35	41	41	29		10.1985	24.4008	16.8623	23.7144	26.2933	20.9502	11.3438	33.0664	36.6503	41.9042	31.0313		0.712558	1.70663	1.20181	1.67037	1.8769	1.50635	0.812899	2.38754
	BPAG_0000006701	333	IPR027843: Domain of unknown function DUF4440; IPR032710: NTF2-like domain superfamily	-	-	-	-		Bm3232	Y	WBGene00223493	Bm3232	Bm3232 [Source:UniProtKB/TrEMBL;Acc:A0A0K0J9E5]	7.5e-84	100	110		322	416	405	338	309	402	330	411	354	311	330		364.88	406.03	401.72	364.339	353.245	323.922	311.955	388.294	316.444	317.859	353.114		80.156	89.2882	90.0212	80.6882	79.2819	73.2285	70.2864	88.151
	BPAG_0000006801	492	-	-	-	-	-		Bm9925	Y	WBGene00230186	Bm9925	Bm9925 [Source:UniProtKB/TrEMBL;Acc:A0A0K0K0Z4]	2.2e-69	99	102		316	400	377	372	307	506	376	371	399	303	306		358.081	390.413	373.947	400.989	350.959	407.723	355.439	350.503	356.67	309.682	327.433		53.241	58.1085	56.7166	60.1056	53.313	62.3855	54.2031	53.8566
	BPAG_0000006901	462	-	-	-	-	-		Bm9926	Y	WBGene00230187	Bm9926	Bm9926 [Source:UniProtKB/TrEMBL;Acc:A0A0H5S779]	4.6e-20	84.6	52		139	153	161	125	135	217	178	228	128	175	155		157.51	149.333	159.696	134.741	154.33	174.854	168.266	215.404	114.421	178.859	165.857		24.94	23.6698	25.794	21.5083	24.9662	28.4915	27.3262	35.247
	BPAG_0000007001	309	-	-	-	-	-		-	-	-	-	-	-	-	-		34	47	62	54	62	65	57	54	57	48	45		38.5277	45.8735	61.4979	58.208	70.8777	52.3755	53.8831	51.0167	50.9529	49.0586	48.1519		9.12105	10.8714	14.8514	13.8923	17.1432	12.7601	13.0833	12.4814
	BPAG_0000007101	4131	IPR018630: RZZ complex, subunit Zwilch	GO:0007093 - BP - mitotic cell cycle checkpoint; GO:1990423 - CC - RZZ complex	-	-	-		Bm7582	Y	WBGene00227843	Bm7582	BMA-ZWL-1 [Source:UniProtKB/TrEMBL;Acc:A0A0H5S6V1]	0	95.9	663		3781	4298	4047	3976	3504	5056	4323	4435	4737	4096	3921		4284.51	4194.99	4014.23	4285.84	4005.73	4074.01	4086.61	4189.98	4234.46	4186.33	4195.64		75.871	74.3629	72.5124	76.5118	72.4717	74.242	74.2219	76.6775
	BPAG_0000007201	2574	-	GO:0005515 - MF - protein binding	01522: Endocrine resistance; 04320: Dorso-ventral axis formation; 04330: Notch signaling pathway; 04361: Axon regeneration; 04658: Th1 and Th2 cell differentiation; 04919: Thyroid hormone signaling pathway; 05020: Prion diseases; 05165: Human papillomavirus infection; 05200: Pathways in cancer; 05206: MicroRNAs in cancer; 05224: Breast cancer	K02599: Notch	-		Bm14719a	Y	WBGene00235054	Bm14719	-	0	97	865		462	515	519	421	463	596	514	563	500	506	485		523.524	502.657	514.797	453.807	529.296	480.243	485.893	531.896	446.955	517.159	518.971		14.8784	14.3002	14.9243	13.002	15.3685	14.0455	14.163	15.6217
	BPAG_0000007301	255	-	-	-	-	-		Bm8236	N	WBGene00228497	Bm8236	Bm8236 [Source:UniProtKB/TrEMBL;Acc:A0A0K0JV77]	1.9e-30	70	80		7	2	5	5	4	3	3	4	2	1	3		7.93218	1.95207	4.95951	5.38963	4.57276	2.41733	2.83595	3.77901	1.78782	1.02205	3.21013		2.27553	0.560576	1.45132	1.55872	1.34023	0.71364	0.834416	1.12034
	BPAG_0000007401	482	-	-	-	-	-		Bm8236	N	WBGene00228497	Bm8236	Bm8236 [Source:UniProtKB/TrEMBL;Acc:A0A0K0JV77]	4.4e-27	39.4	198		5	9	4	7	10	19	13	17	3	8	12		5.66584	8.78429	3.96761	7.54549	11.4319	15.3098	12.2891	16.0608	2.68173	8.17643	12.8405		0.859898	1.33457	0.614253	1.15449	1.77261	2.39114	1.91293	2.51902
	BPAG_0000007501	1101	IPR000276: G protein-coupled receptor, rhodopsin-like; IPR017452: GPCR, rhodopsin-like, 7TM	GO:0004930 - MF - G-protein coupled receptor activity; GO:0007186 - BP - G-protein coupled receptor signaling pathway; GO:0016021 - CC - integral component of membrane	-	-	-		Bm1673a	Y	WBGene00221934	Bm1673	G_PROTEIN_RECEP_F1_2 domain-containing protein [Source:UniProtKB/TrEMBL;Acc:A0A4E9EXL0]	2.1e-249	100	348		155	218	172	157	172	191	205	192	199	138	164		175.641	212.775	170.607	169.234	196.628	153.903	193.79	181.393	177.888	141.043	175.487		11.6699	14.1519	11.5631	11.3357	13.3475	10.5231	13.2059	12.455
	BPAG_0000007601	258	-	-	-	-	-		Bm1673a	N	WBGene00221934	Bm1673	G_PROTEIN_RECEP_F1_2 domain-containing protein [Source:UniProtKB/TrEMBL;Acc:A0A4E9EXL0]	3.5e-08	95.7	23		1	1	3	1	3	2	3	0	0	3	5		1.13317	0.976033	2.9757	1.07793	3.42957	1.61155	2.83595	0	0	3.06616	5.35022		0.321295	0.277029	0.860668	0.308118	0.993485	0.470228	0.824714	0
	BPAG_0000007701	1401	-	GO:0005634 - CC - nucleus; GO:0006357 - BP - regulation of transcription from RNA polymerase II promoter; GO:0070449 - CC - elongin complex	03400: DNA repair and recombination proteins	K15076: transcription elongation factor B, polypeptide 3	-		Bm9930	Y	WBGene00230191	Bma-tceb-3	Bm9930 [Source:UniProtKB/TrEMBL;Acc:A0A0J9XUD4]	2.7e-319	98.7	445		3826	4582	4516	4291	4042	5638	4727	4626	4819	4641	4256		4335.5	4472.18	4479.43	4625.38	4620.77	4542.97	4468.51	4370.43	4307.76	4743.35	4554.1		226.376	233.755	238.589	243.477	246.501	244.11	239.304	235.829
	BPAG_0000007801	1842	IPR000504: RNA recognition motif domain; IPR012677: Nucleotide-binding alpha-beta plait domain superfamily; IPR035979: RNA-binding domain superfamily	GO:0003676 - MF - nucleic acid binding	-	-	-		Bm6905a	N	WBGene00227166	Bm6905	RRM domain-containing protein [Source:UniProtKB/TrEMBL;Acc:A0A4E9EZ34]	0	92.7	605		2988	3313	3427	2983	2822	3883	3445	3283	3529	3033	3147		3385.91	3233.6	3399.25	3215.46	3226.08	3128.83	3256.62	3101.63	3154.61	3099.89	3367.43		134.467	128.551	137.708	128.736	130.896	127.872	132.648	127.295
	BPAG_0000007901	1548	-	-	03021: Transcription machinery	K15212: TATA box-binding protein-associated factor RNA polymerase I subunit A	-		Bm6905a	Y	WBGene00227166	Bm6905	RRM domain-containing protein [Source:UniProtKB/TrEMBL;Acc:A0A4E9EZ34]	0	94.6	515		766	896	940	854	828	1303	1126	1125	1164	1091	1042		868.007	874.525	932.388	920.549	946.56	1049.93	1064.43	1062.85	1040.51	1115.06	1114.99		41.0187	41.3697	44.946	43.8555	45.7003	51.0589	51.5904	51.9053
	BPAG_0000008001	483	-	-	-	-	-		-	-	-	-	-	-	-	-		6	4	10	1	4	4	7	8	10	4	2		6.79901	3.90413	9.91902	1.07793	4.57276	3.22311	6.61722	7.55803	8.93911	4.08821	2.14009		1.02974	0.591913	1.53245	0.164585	0.707575	0.502355	1.0279	1.18297
	BPAG_0000008101	264	-	-	-	-	-		-	-	-	-	-	-	-	-		8	4	4	0	7	5	3	8	4	5	4		9.06535	3.90413	3.96761	0	8.00232	4.02889	2.83595	7.55803	3.57564	5.11027	4.28017		2.51195	1.08293	1.12148	0	2.26545	1.14885	0.80597	2.16429
	BPAG_0000008201	534	-	-	-	-	-		Bm9931	Y	WBGene00230192	Bm9931	Bm9931 [Source:UniProtKB/TrEMBL;Acc:A0A0J9XUL1]	1.9e-125	99.4	176		329	362	339	291	289	453	350	382	472	343	307		372.812	353.324	336.255	313.677	330.382	365.017	330.861	360.896	421.926	350.564	328.503		51.0715	48.4521	46.9886	43.3201	46.2398	51.4582	46.4867	51.0919
	BPAG_0000008301	396	IPR037212: Mediator complex, subunit Med7/Med21-like	GO:0016592 - CC - mediator complex	03021: Transcription machinery	K15152: mediator of RNA polymerase II transcription subunit 21	-		Bm18585	Y	WBGene00304246	Bma-mdt-21	Mediator of RNA polymerase II transcription subunit 21 [Source:UniProtKB/TrEMBL;Acc:A0A5S6PFN9]	7.8e-87	98.5	131		747	837	805	801	675	968	833	786	1013	720	708		846.477	816.939	798.481	863.419	771.652	779.992	787.449	742.576	905.532	735.878	757.591		156.369	151.069	150.465	160.796	145.636	148.279	149.194	141.761
	BPAG_0000008401	456	IPR004123: Dim1 family; IPR036249: Thioredoxin-like superfamily	GO:0000398 - BP - mRNA splicing, via spliceosome; GO:0046540 - CC - U4/U6 x U5 tri-snRNP complex	03040: Spliceosome; 03041: Spliceosome	K12859: U5 snRNP protein, DIM1 family	-		Bm2352	Y	WBGene00222613	Bm2352	Thioredoxin-like protein [Source:UniProtKB/TrEMBL;Acc:A0A4E9EZI5]	9e-105	94	151		746	833	743	727	637	945	823	858	929	698	652		845.344	813.035	736.983	783.653	728.211	761.459	777.996	810.598	830.443	713.393	697.668		135.612	130.564	120.603	126.738	119.353	125.709	128.008	134.385
	BPAG_0000008501	1020	IPR024445: ISXO2-like transposase domain	-	-	-	-		Bm9932	Y	WBGene00230193	Bm9932	DDE_Tnp_IS1595 domain-containing protein [Source:UniProtKB/TrEMBL;Acc:A0A4E9EX63]	1.8e-254	99.4	339		983	1174	1089	1030	925	1349	1151	1230	1179	1012	1051		1113.9	1145.86	1080.18	1110.26	1057.45	1086.99	1088.06	1162.05	1053.92	1034.32	1124.62		79.8873	82.2646	79.0245	80.2739	77.4821	80.225	80.0344	86.1261
	BPAG_0000008601	1404	-	GO:0016853 - MF - isomerase activity; GO:0045454 - BP - cell redox homeostasis	03110: Chaperones and folding catalysts; 04131: Membrane trafficking; 04141: Protein processing in endoplasmic reticulum	K09584: protein disulfide-isomerase A6	-		Bm1792	Y	WBGene00222053	Bma-pdi-6	BMA-TAG-320 [Source:UniProtKB/TrEMBL;Acc:A0A0H5S7C9]	0	95.4	438		4979	5422	5149	4898	4636	6356	5472	5448	5492	4594	4458		5642.05	5292.05	5107.3	5279.68	5299.82	5121.52	5172.78	5147.02	4909.36	4695.31	4770.25		293.967	276.018	271.45	277.325	282.121	274.609	276.427	277.14
	BPAG_0000008701	1131	-	-	-	-	-		Bm9933a	Y	WBGene00230194	Bm9933	-	1.8e-180	94.3	280		1183	1276	1289	1346	1068	1478	1285	1345	1241	1220	1102		1340.54	1245.42	1278.56	1450.89	1220.93	1190.94	1214.73	1270.69	1109.34	1246.91	1179.19		86.7054	80.6367	84.3577	94.6063	80.6805	79.2702	80.5828	84.9355
	BPAG_0000008801	3417	-	GO:0005515 - MF - protein binding; GO:0006486 - BP - protein glycosylation; GO:0008378 - MF - galactosyltransferase activity; GO:0016020 - CC - membrane	04121: Ubiquitin system	K15046: influenza virus NS1A-binding protein	-		Bm5309a	Y	WBGene00225570	Bma-ivns-1	BTB domain-containing protein [Source:UniProtKB/TrEMBL;Acc:A0A4E9EZ83]	0	91.5	733		3726	4203	4077	3712	3385	5037	4196	4275	4277	3871	3786		4222.19	4102.26	4043.98	4001.26	3869.69	4058.7	3966.55	4038.82	3823.26	3956.37	4051.18		90.3904	87.9142	88.3141	86.3576	84.6396	89.418	87.0948	89.3554
	BPAG_0000008901	1413	-	-	-	-	-		Bm9934	Y	WBGene00230195	Bm9934	Bm9934, isoform a [Source:UniProtKB/TrEMBL;Acc:A0A1P6CI43]	9.3e-249	99.1	340		840	930	927	719	767	959	871	963	868	814	753		951.862	907.71	919.493	775.029	876.826	772.74	823.371	909.797	775.915	831.951	805.743		49.2789	47.042	48.5592	40.4505	46.3781	41.1694	43.7198	48.6759
	BPAG_0000009001	366	-	-	-	-	-		Bm9935	Y	WBGene00230196	Bm9935	Bm9935 [Source:UniProtKB/TrEMBL;Acc:A0A0J9XUG0]	2.2e-58	93.3	90		19	13	14	8	9	19	19	14	14	11	12		21.5302	12.6884	13.8866	8.62341	10.2887	15.3098	17.961	13.2265	12.5148	11.2426	12.8405		4.30325	2.53868	2.83127	1.73759	2.10098	3.14898	3.68192	2.73197
	BPAG_0000009101	960	-	GO:0004799 - MF - thymidylate synthase activity; GO:0006231 - BP - dTMP biosynthetic process	00240: Pyrimidine metabolism; 00670: One carbon pool by folate; 01523: Antifolate resistance	K00560: thymidylate synthase	-		Bm7277a	Y	WBGene00227538	Bma-tyms-1.1	Thymidylat_synt domain-containing protein [Source:UniProtKB/TrEMBL;Acc:A0A4E9EZW9]	1.7e-227	95	317		2534	2877	2652	2299	1958	2882	2442	2665	2597	2132	2052		2871.45	2808.05	2630.52	2478.15	2238.36	2322.25	2308.46	2517.77	2321.49	2179.02	2195.73		218.806	214.197	204.473	190.373	174.261	182.105	180.416	198.269
	BPAG_0000009201	237	-	-	-	-	-		-	-	-	-	-	-	-	-		35	32	43	25	19	44	35	37	42	39	36		39.6609	31.233	42.6518	26.9482	21.7206	35.4542	33.0861	34.9559	37.5443	39.8601	38.5216		12.2418	9.65043	13.4293	8.3855	6.8496	11.2617	10.4742	11.1502
	BPAG_0000009301	177	-	-	-	-	-		-	-	-	-	-	-	-	-		83	90	109	71	72	91	91	80	151	114	86		94.053	87.8429	108.117	76.5328	82.3096	73.3257	86.0239	75.5803	134.981	116.514	92.0237		38.8713	36.3424	45.5814	31.8877	34.7551	31.1865	36.4645	32.281
	BPAG_0000009401	2127	-	GO:0005524 - MF - ATP binding; GO:0016021 - CC - integral component of membrane; GO:0016887 - MF - ATPase activity; GO:0042626 - MF - ATPase activity, coupled to transmembrane movement of substances; GO:0055085 - BP - transmembrane transport	02000: Transporters; 02010: ABC transporters; 04090: CD molecules; 04147: Exosome; 04976: Bile secretion; 05206: MicroRNAs in cancer; 05226: Gastric cancer	K05658: ATP-binding cassette, subfamily B (MDR/TAP), member 1	-		Bm11309	Y	WBGene00231570	Bm11309	p-glycoprotein-like protein, putative [Source:UniProtKB/TrEMBL;Acc:A0A4E9F9F7]	0	94.4	733		13	17	12	20	16	36	9	15	11	10	19		14.7312	16.5926	11.9028	21.5585	18.291	29.008	8.50785	14.1713	9.83302	10.2205	20.3308		0.506641	0.57125	0.417588	0.747481	0.642706	1.02668	0.300107	0.503679
	BPAG_0000009501	348	-	-	-	-	-		Bm14708a	N	WBGene00235043	Bm14708	Bm14708 [Source:UniProtKB/TrEMBL;Acc:A0A5S6PBN1]	1.9e-77	99.1	115		17	29	20	14	13	15	19	15	28	18	10		19.2639	28.3049	19.838	15.091	14.8615	12.0867	17.961	14.1713	25.0295	18.397	10.7004		4.04943	5.95612	4.25388	3.19806	3.19171	2.61463	3.87236	3.07852
	BPAG_0000009601	468	-	GO:0005515 - MF - protein binding	-	-	-		Bm14708a	Y	WBGene00235043	Bm14708	Bm14708 [Source:UniProtKB/TrEMBL;Acc:A0A5S6PBN1]	1e-101	98	150		5	9	11	10	13	7	14	4	18	10	9		5.66584	8.78429	10.9109	10.7793	14.8615	5.64044	13.2344	3.77901	16.0904	10.2205	9.63039		0.885622	1.37449	1.73973	1.6986	2.37333	0.907299	2.1217	0.610441
	BPAG_0000009701	4770	IPR001680: WD40 repeat; IPR012901: N2227-like; IPR015943: WD40/YVTN repeat-like-containing domain superfamily; IPR017986: WD40-repeat-containing domain; IPR029063: S-adenosyl-L-methionine-dependent methyltransferase; IPR036322: WD40-repeat-containing domain superfamily	GO:0005515 - MF - protein binding	00340: Histidine metabolism	K19787: -	-		Bm12153	Y	WBGene00232414	Bm12153	WD_REPEATS_REGION domain-containing protein [Source:UniProtKB/TrEMBL;Acc:A0A4E9FBF6]	0	93.5	1193		2305	2833	2775	2363	2404	3567	2903	3080	2844	2810	2576		2611.95	2765.1	2752.53	2547.14	2748.23	2874.21	2744.26	2909.84	2542.28	2871.97	2756.43		40.0568	42.4495	43.0605	39.3806	43.0602	45.361	43.1649	46.1171
	BPAG_0000009801	510	IPR036249: Thioredoxin-like superfamily	-	-	-	-		Bm5685	Y	WBGene00225946	Bm5685	Hypothetical 19.4 kDa protein T09A5.5 in chromosome III, putative [Source:UniProtKB/TrEMBL;Acc:A0A4E9FAQ3]	1.4e-132	100	169		923	999	1028	942	873	1275	1095	974	987	869	897		1045.91	975.057	1019.67	1015.41	998.004	1027.37	1035.12	920.19	882.29	888.164	959.829		150.022	140.004	149.196	146.831	146.253	151.648	152.281	136.401
	BPAG_0000009901	738	IPR007918: Mitochondrial distribution/morphology family 35/apoptosis; IPR019145: Mediator complex, subunit Med10	GO:0001104 - MF - RNA polymerase II transcription cofactor activity; GO:0006357 - BP - regulation of transcription from RNA polymerase II promoter; GO:0016592 - CC - mediator complex	03021: Transcription machinery	K15151: mediator of RNA polymerase II transcription subunit 10	-		Bm5686	Y	WBGene00225947	Bma-mdt-10	Mediator of RNA polymerase II transcription subunit 10 [Source:UniProtKB/TrEMBL;Acc:A0A4E9F9E9]	9.2e-116	98.8	165		1022	1086	1149	1066	860	1287	1073	1120	1129	1032	1066		1158.1	1059.97	1139.69	1149.07	983.142	1037.04	1014.33	1058.12	1009.23	1054.76	1140.67		114.794	105.176	115.239	114.825	99.5639	105.784	103.121	108.391
	BPAG_0000010001	708	IPR010729: Ribosomal protein L47, mitochondrial; IPR038340: MRP-L47 superfamily, mitochondrial	GO:0003735 - MF - structural constituent of ribosome; GO:0005761 - CC - mitochondrial ribosome; GO:0006412 - BP - translation	03011: Ribosome	K17428: large subunit ribosomal protein L47, mitochondrial	-		Bm1728	Y	WBGene00221989	Bma-mrpl-47	39S ribosomal protein L47, mitochondrial, putative [Source:UniProtKB/TrEMBL;Acc:A0A4E9FB65]	2.5e-170	100	235		1340	1572	1314	1212	975	1449	1292	1250	1357	1069	1032		1518.45	1534.32	1303.36	1306.45	1114.61	1167.57	1221.35	1180.94	1213.04	1092.58	1104.28		156.89	158.695	137.371	136.084	117.661	124.146	129.429	126.098
	BPAG_0000010101	3249	IPR008380: HAD-superfamily hydrolase, subfamily IG, 5'-nucleotidase; IPR011990: Tetratricopeptide-like helical domain superfamily; IPR013026: Tetratricopeptide repeat-containing domain; IPR023214: HAD superfamily; IPR036412: HAD-like superfamily	GO:0005515 - MF - protein binding	03036: Chromosome and associated proteins	K19685: -	-		Bm16934a	Y	WBGene00255552	Bm16934	Bm16934, isoform a; Bm16934, isoform b [Source:UniProtKB/TrEMBL;Acc:A0A0H5SF44]	0	98.7	546		101	136	138	118	123	147	135	144	157	156	137		114.45	132.74	136.882	127.195	140.612	118.449	127.618	136.044	140.344	159.44	146.596		2.57689	2.99181	3.14386	2.88715	3.23456	2.74452	2.94704	3.1655
	BPAG_0000010201	656	-	-	-	-	-		Bm8651a	Y	WBGene00228912	Bm8651	Bm8651, isoform b [Source:UniProtKB/TrEMBL;Acc:A0A0K0JWK0]	2.4e-55	98.6	145		35	33	25	40	23	45	34	31	30	23	22		39.6609	32.2091	24.7975	43.1171	26.2933	36.26	32.1408	29.2874	26.8173	23.5072	23.541		4.42271	3.59546	2.82079	4.84723	2.9956	4.16109	3.67601	3.37511
	BPAG_0000010301	1398	IPR020103: Pseudouridine synthase, catalytic domain superfamily	GO:0001522 - BP - pseudouridine synthesis; GO:0003723 - MF - RNA binding; GO:0009451 - BP - RNA modification; GO:0009982 - MF - pseudouridine synthase activity	03016: Transfer RNA biogenesis	K07583: tRNA pseudouridine synthase 10	-		Bm6653	Y	WBGene00226914	Bm6653	Bm6653 [Source:UniProtKB/TrEMBL;Acc:A0A0K0JP33]	0	97.4	465		548	688	580	563	537	727	652	631	778	610	562		620.976	671.51	575.303	606.873	613.892	585.8	616.347	596.139	695.463	623.453	601.364		32.4936	35.1744	30.7082	32.0139	32.8191	31.5446	33.0782	32.2368
	BPAG_0000010401	2577	IPR003601: DNA topoisomerase, type IA, domain 2; IPR003602: DNA topoisomerase, type IA, DNA-binding domain; IPR006171: TOPRIM domain; IPR013497: DNA topoisomerase, type IA, central; IPR013824: DNA topoisomerase, type IA, central region, subdomain 1; IPR013825: DNA topoisomerase, type IA, central region, subdomain 2; IPR013826: DNA topoisomerase, type IA, central region, subdomain 3; IPR023405: DN…	GO:0003677 - MF - DNA binding; GO:0003916 - MF - DNA topoisomerase activity; GO:0003917 - MF - DNA topoisomerase type I activity; GO:0006265 - BP - DNA topological change	03032: DNA replication proteins; 03400: DNA repair and recombination proteins; 03440: Homologous recombination; 03460: Fanconi anemia pathway	K03165: DNA topoisomerase III	-		Bm6649	Y	WBGene00226910	Bm6649	DNA topoisomerase [Source:UniProtKB/TrEMBL;Acc:A0A4E9FAP4]	0	99.9	858		645	843	814	717	742	971	933	894	1033	847	785		730.894	822.795	807.408	772.873	848.246	782.41	881.981	844.609	923.41	865.679	839.984		20.7477	23.3807	23.38	22.1178	24.6008	22.8561	25.6785	24.7772
	BPAG_0000010501	2445	IPR000014: PAS domain; IPR035965: PAS domain superfamily	-	03400: DNA repair and recombination proteins; 04710: Circadian rhythm; 04711: Circadian rhythm - fly; 04713: Circadian entrainment; 05202: Transcriptional misregulation in cancer; 05221: Acute myeloid leukemia	K02633: period circadian protein	-		Bm4185	Y	WBGene00224446	Bma-lin-42	BMA-LIN-42, isoform d [Source:UniProtKB/TrEMBL;Acc:A0A1P6C0C9]	0	99.3	815		1452	1909	1851	1443	1440	2038	1899	1489	1469	1585	1648		1645.36	1863.25	1836.01	1555.45	1646.19	1642.17	1795.16	1406.74	1313.16	1619.95	1763.43		49.228	55.8048	56.0353	46.9164	50.3203	50.5619	55.0868	43.4956
	BPAG_0000010601	2094	IPR003593: AAA+ ATPase domain; IPR003959: ATPase, AAA-type, core; IPR004942: Roadblock/LAMTOR2 domain; IPR021911: ATPase family AAA domain-containing protein 3, domain of unknown function DUF3523; IPR027417: P-loop containing nucleoside triphosphate hydrolase	GO:0005524 - MF - ATP binding	03029: Mitochondrial biogenesis	K17681: ATPase family AAA domain-containing protein 3A/B	-		Bm4337a	Y	WBGene00224598	Bma-atad-3	MGC68616 protein, putative [Source:UniProtKB/TrEMBL;Acc:A0A4E9FF54]	0	99.5	605		3121	3500	3488	3179	2860	3919	3435	3336	3370	3145	2974		3536.62	3416.11	3459.75	3426.73	3269.52	3157.84	3247.16	3151.7	3012.48	3214.36	3182.31		123.55	119.464	123.292	120.684	116.694	113.526	116.346	113.783
	BPAG_0000010701	312	-	-	-	-	-		-	-	-	-	-	-	-	-		2	3	4	3	2	4	3	1	0	4	4		2.26634	2.9281	3.96761	3.23378	2.28638	3.22311	2.83595	0.944753	0	4.08821	4.28017		0.531373	0.687245	0.948942	0.764371	0.54769	0.777685	0.681975	0.228915
	BPAG_0000010801	231	-	-	-	-	-		Bm8652	Y	WBGene00228913	Bm8652	Formin I2I isoform, putative [Source:UniProtKB/TrEMBL;Acc:A0A4E9FBL4]	1e-10	95.7	23		6	3	7	2	6	9	5	3	3	4	2		6.79901	2.9281	6.94331	2.15585	6.85913	7.25199	4.72659	2.83426	2.68173	4.08821	2.14009		2.1531	0.928227	2.24295	0.688265	2.21921	2.36335	1.53518	0.927554
	BPAG_0000010901	843	-	GO:0030246 - MF - carbohydrate binding	04091: Lectins	K10093: galectin-9	-		Bm4277	Y	WBGene00224538	Bma-lec-2	Galectin [Source:UniProtKB/TrEMBL;Acc:A0A4E9F9D5]	1e-212	100	280		8244	8789	9368	7889	7337	10949	8486	9947	10300	8609	7848		9341.84	8578.35	9292.13	8503.76	8387.58	8822.45	8021.96	9397.46	9207.28	8798.86	8397.7		810.652	745.172	822.533	743.93	743.619	787.853	713.965	842.741
	BPAG_0000011001	2187	-	GO:0005509 - MF - calcium ion binding; GO:0005515 - MF - protein binding	04131: Membrane trafficking; 04144: Endocytosis	K12472: epidermal growth factor receptor substrate 15	-		Bm7644	Y	WBGene00227905	Bma-ehs-1	EF hand family protein [Source:UniProtKB/TrEMBL;Acc:A0A4E9F9C7]	0	99.5	728		3182	3778	3482	3084	2949	4075	3652	3616	3859	3187	3139		3605.74	3687.45	3453.8	3324.33	3371.26	3283.54	3452.3	3416.23	3449.6	3257.28	3358.87		120.608	123.469	117.846	112.099	115.209	113.026	118.436	118.089
	BPAG_0000011101	1140	IPR001466: Beta-lactamase-related; IPR012338: Beta-lactamase/transpeptidase-like	-	-	-	S12		Bm2538	Y	WBGene00222799	Bm2538	Beta-lactamase family protein [Source:UniProtKB/TrEMBL;Acc:A0A4E9FBD5]	1e-273	95.6	385		1091	896	904	989	706	1253	1078	1088	1219	894	1001		1236.29	874.525	896.679	1066.07	807.091	1009.64	1019.05	1027.89	1089.68	913.716	1071.11		79.3312	56.1756	58.6946	68.965	52.9127	66.6721	67.0681	68.1638
	BPAG_0000011201	1035	IPR000719: Protein kinase domain; IPR011009: Protein kinase-like domain superfamily	GO:0004672 - MF - protein kinase activity; GO:0005524 - MF - ATP binding; GO:0006468 - BP - protein phosphorylation	-	-	-		Bm8653	Y	WBGene00228914	Bm8653	Bm8653 [Source:UniProtKB/TrEMBL;Acc:A0A0K0JWK2]	7.8e-254	98	345		18	27	20	24	30	24	16	32	15	27	12		20.397	26.3529	19.838	25.8702	34.2957	19.3387	15.1251	30.2321	13.4087	27.5954	12.8405		1.44164	1.86453	1.43029	1.84335	2.47651	1.40659	1.09643	2.2082
	BPAG_0000011301	975	IPR018301: Aromatic amino acid hydroxylase, iron/copper binding site; IPR019774: Aromatic amino acid hydroxylase, C-terminal; IPR036329: Aromatic amino acid monoxygenase, C-terminal domain superfamily; IPR036951: Aromatic amino acid hydroxylase superfamily	GO:0004497 - MF - monooxygenase activity; GO:0005506 - MF - iron ion binding; GO:0009072 - BP - aromatic amino acid family metabolic process; GO:0016714 - MF - oxidoreductase activity, acting on paired donors, with incorporation or reduction of molecular oxygen, reduced pteridine as one donor, and incorporation of one atom of oxygen; GO:0055114 - BP - oxidation-reduction process	00380: Tryptophan metabolism; 00790: Folate biosynthesis; 04361: Axon regeneration; 04726: Serotonergic synapse	K00502: tryptophan 5-monooxygenase	-		Bm7656a	Y	WBGene00227917	Bma-tph-1	BH4_AAA_HYDROXYL_2 domain-containing protein [Source:UniProtKB/TrEMBL;Acc:A0A4E9FAN6]	6.7e-215	96.3	295		114	140	121	125	115	123	121	157	166	152	133		129.181	136.645	120.02	134.741	131.467	99.1106	114.383	148.326	148.389	155.352	142.316		9.69225	10.2629	9.18576	10.1916	10.0775	7.65242	8.80202	11.5007
	BPAG_0000011401	285	-	-	-	-	-		-	-	-	-	-	-	-	-		25	33	47	49	69	75	56	72	94	81	105		28.3292	32.2091	46.6194	52.8184	78.88	60.4333	52.9378	68.0222	84.0276	82.7863	112.355		7.27142	8.27588	12.2064	13.6675	20.6854	15.963	13.9362	18.0434
	BPAG_0000011501	2487	IPR000719: Protein kinase domain; IPR008271: Serine/threonine-protein kinase, active site; IPR011009: Protein kinase-like domain superfamily; IPR017441: Protein kinase, ATP binding site	GO:0004672 - MF - protein kinase activity; GO:0005524 - MF - ATP binding; GO:0006468 - BP - protein phosphorylation	01001: Protein kinases; 04010: MAPK signaling pathway; 04066: HIF-1 signaling pathway; 04910: Insulin signaling pathway	K04372: MAP kinase interacting serine/threonine kinase	-		Bm5443a	Y	WBGene00225704	Bma-mnk-1	Protein kinase domain containing protein [Source:UniProtKB/TrEMBL;Acc:A0A4E9FB47]	0	95.1	804		762	1057	1038	1153	1166	1405	1243	1311	1729	1517	1624		863.474	1031.67	1029.59	1242.85	1332.96	1132.12	1175.03	1238.57	1545.57	1550.46	1737.75		25.3982	30.3769	30.8927	36.8545	40.0574	34.2688	35.4484	37.6493
	BPAG_0000011601	3198	IPR000253: Forkhead-associated (FHA) domain; IPR008984: SMAD/FHA domain superfamily; IPR011011: Zinc finger, FYVE/PHD-type; IPR013083: Zinc finger, RING/FYVE/PHD-type	GO:0005515 - MF - protein binding	-	-	-		Bm11290	Y	WBGene00231551	Bm11290	FHA domain-containing protein [Source:UniProtKB/TrEMBL;Acc:A0A4E9FBK1]	0	96.6	1067		1374	1679	1785	1610	1586	2316	1947	1928	1786	1530	1772		1556.97	1638.76	1770.54	1735.46	1813.1	1866.18	1840.53	1821.48	1596.52	1563.74	1896.12		35.615	37.5247	41.3137	40.0207	42.3725	43.9297	43.1807	43.0584
	BPAG_0000011701	1713	-	-	03400: DNA repair and recombination proteins; 04111: Cell cycle - yeast; 04113: Meiosis - yeast	K06662: cell cycle checkpoint protein	-		Bm3749a	Y	WBGene00224010	Bma-hpr-17	Bm3749 [Source:UniProtKB/TrEMBL;Acc:A0A5S6PL98]	0	92.3	570		2005	2609	2497	2355	1937	2949	2518	2324	2262	2238	2242		2272	2546.47	2476.78	2538.52	2214.36	2376.24	2380.31	2195.61	2022.03	2287.36	2399.04		97.0245	108.858	107.894	109.288	96.6122	104.428	104.256	96.8966
	BPAG_0000011801	1182	IPR000326: Phosphatidic acid phosphatase type 2/haloperoxidase; IPR036938: Phosphatidic acid phosphatase type 2/haloperoxidase superfamily	-	99983: Lipid metabolism	K19581: -	-		Bm5612	Y	WBGene00225873	Bma-plpr-1	PAP2 superfamily protein [Source:UniProtKB/TrEMBL;Acc:A0A4E9F9B8]	2.7e-287	97.5	393		286	347	352	299	277	339	333	289	292	246	217		324.086	338.683	349.149	322.3	316.663	273.158	314.791	273.034	261.022	251.425	232.199		20.0573	20.9825	22.0424	20.109	20.0227	17.3972	19.9815	17.4626
	BPAG_0000011901	882	IPR017452: GPCR, rhodopsin-like, 7TM; IPR019427: 7TM GPCR, serpentine receptor class w (Srw)	GO:0008528 - MF - G-protein coupled peptide receptor activity; GO:0016021 - CC - integral component of membrane	-	-	-		Bm2792	Y	WBGene00223053	Bm2792	Bm2792 [Source:UniProtKB/TrEMBL;Acc:A0A0J9YAE1]	8.5e-43	96.2	78		12	9	7	7	16	8	19	11	17	15	9		13.598	8.78429	6.94331	7.54549	18.291	6.44622	17.961	10.3923	15.1965	15.3308	9.63039		1.12781	0.729321	0.58744	0.630909	1.54993	0.550199	1.52787	0.890746
	BPAG_0000012001	1728	IPR000679: Zinc finger, GATA-type; IPR013088: Zinc finger, NHR/GATA-type	GO:0003700 - MF - transcription factor activity, sequence-specific DNA binding; GO:0006355 - BP - regulation of transcription, DNA-templated; GO:0008270 - MF - zinc ion binding; GO:0043565 - MF - sequence-specific DNA binding	-	-	-		Bm2533	Y	WBGene00222794	Bm2533	Bm2533 [Source:UniProtKB/TrEMBL;Acc:A0A0K0J6E4]	0	94.4	575		125	165	147	108	148	178	140	174	142	118	109		141.646	161.045	145.81	116.416	169.192	143.428	132.344	164.387	126.935	120.602	116.635		5.9964	6.82472	6.29662	4.96841	7.31775	6.24848	5.74627	7.19176
	BPAG_0000012101	1107	-	-	-	-	-		Bm10310	Y	WBGene00230571	Bm10310	Bm10310 [Source:UniProtKB/TrEMBL;Acc:A0A0K0IMT6]	5.2e-210	97.3	300		675	605	662	538	461	621	647	611	651	552	508		764.889	590.5	656.639	579.925	527.01	500.388	611.62	577.244	581.936	564.173	543.582		50.5453	39.0618	44.2634	38.6342	35.5806	34.0284	41.4532	39.4206
	BPAG_0000012201	273	-	-	-	-	-		Bm10308	Y	WBGene00230569	Bm10308	-	1.4e-22	100	36		7	4	3	7	4	9	4	9	5	1	1		7.93218	3.90413	2.9757	7.54549	4.57276	7.25199	3.78127	8.50278	4.46955	1.02205	1.07004		2.12549	1.04723	0.813379	2.03832	1.25186	1.99976	1.0392	2.35456
	BPAG_0000012301	984	-	-	-	-	-		Bm3439	Y	WBGene00223700	Bm3439	Bm3439 [Source:UniProtKB/TrEMBL;Acc:A0A0H5SM18]	1.2e-214	99.1	327		117	146	174	146	115	131	142	107	130	147	123		132.581	142.501	172.591	157.377	131.467	105.557	134.235	101.089	116.208	150.242	131.615		9.85632	10.6048	13.0885	11.7949	9.98533	8.07559	10.2352	7.76638
	BPAG_0000012401	1122	IPR000953: Chromo/chromo shadow domain; IPR016197: Chromo-like domain superfamily; IPR023779: Chromo domain, conserved site; IPR023780: Chromo domain	-	03036: Chromosome and associated proteins	K21871: -	-		Bm5688	Y	WBGene00225949	Bm5688	Chromo domain-containing protein [Source:UniProtKB/TrEMBL;Acc:A0A4E9EY63]	2.6e-255	96.2	373		3040	3489	3558	3444	3183	4445	3646	3475	2893	3249	3223		3444.83	3405.38	3529.19	3712.38	3638.77	3581.68	3446.63	3283.02	2586.08	3320.65	3448.75		224.598	222.256	234.718	244.01	242.384	240.313	230.476	221.203
	BPAG_0000012501	873	-	GO:0005515 - MF - protein binding	-	-	-		Bm5346a	Y	WBGene00225607	Bma-mpz-5.1	Bm5346 [Source:UniProtKB/TrEMBL;Acc:A0A5S6PPS3]	1.9e-204	97.9	290		644	757	803	692	586	790	686	747	725	623	645		729.761	738.857	796.497	745.925	669.909	636.564	648.488	705.731	648.085	636.739	690.178		61.1499	61.9764	68.0825	63.0129	57.3513	54.8922	55.7329	61.1134
	BPAG_0000012601	645	-	GO:0003735 - MF - structural constituent of ribosome; GO:0005622 - CC - intracellular; GO:0005840 - CC - ribosome; GO:0006412 - BP - translation	03010: Ribosome; 03011: Ribosome	K02866: large subunit ribosomal protein L10e	-		Bm13774a	Y	WBGene00234035	Bma-rpl-10.2	Ribosomal_L16 domain-containing protein [Source:UniProtKB/TrEMBL;Acc:A0A4E9EZ61]	7.1e-162	98.6	214		6143	6935	6477	6231	4950	7009	6188	5912	6397	4961	4926		6961.05	6768.79	6424.55	6716.56	5658.78	5647.69	5849.62	5585.38	5718.35	5070.41	5271.03		789.487	768.478	743.273	767.954	655.7	659.165	680.444	654.643
	BPAG_0000012701	1551	IPR000719: Protein kinase domain; IPR011009: Protein kinase-like domain superfamily	GO:0004672 - MF - protein kinase activity; GO:0005524 - MF - ATP binding; GO:0006468 - BP - protein phosphorylation	01001: Protein kinases	K08814: tribbles	-		Bm10307	Y	WBGene00230568	Bma-nipi-3	BMA-NIPI-3 [Source:UniProtKB/TrEMBL;Acc:A0A0H5S874]	0	97.9	516		2692	2894	3030	3035	2824	3996	3367	3330	3375	2897	3002		3050.49	2824.64	3005.46	3271.51	3228.37	3219.89	3182.88	3146.03	3016.95	2960.89	3212.27		143.876	133.362	144.599	155.555	155.565	156.283	153.969	153.342
	BPAG_0000012801	855	-	-	-	-	-		Bm6980a	Y	WBGene00227241	Bm6980	Bm6980 [Source:UniProtKB/TrEMBL;Acc:A0A0H5SM34]	2.1e-153	80.3	284		1375	1507	1711	1480	1374	2010	1550	1584	1951	1597	1566		1558.11	1470.88	1697.14	1595.33	1570.74	1619.61	1465.24	1496.49	1744.02	1632.22	1675.69		133.309	125.977	148.121	137.605	137.303	142.603	128.578	132.318
	BPAG_0000012901	1779	-	-	-	-	-		Bm10306a	Y	WBGene00230567	Bm10306	Bm10306 [Source:UniProtKB/TrEMBL;Acc:A0A0H5S9G7]	0	97.1	592		2689	3125	2989	2861	2568	3694	3138	3095	3293	3005	2746		3047.09	3050.1	2964.79	3083.95	2935.71	2976.54	2966.41	2924.01	2943.65	3071.27	2938.34		125.297	125.551	124.361	127.844	123.333	125.956	125.106	124.255
	BPAG_0000013001	1098	IPR000358: Ribonucleotide reductase small subunit family; IPR009078: Ferritin-like superfamily; IPR012348: Ribonucleotide reductase-like; IPR030475: Ribonucleotide reductase small subunit, acitve site; IPR033909: Ribonucleotide reductase small subunit	GO:0009263 - BP - deoxyribonucleotide biosynthetic process; GO:0016491 - MF - oxidoreductase activity; GO:0055114 - BP - oxidation-reduction process	00230: Purine metabolism; 00240: Pyrimidine metabolism; 00480: Glutathione metabolism; 00983: Drug metabolism - other enzymes; 03400: DNA repair and recombination proteins; 04115: p53 signaling pathway	K10808: ribonucleoside-diphosphate reductase subunit M2	-		Bm13873	Y	WBGene00234134	Bma-rnr-2	BMA-RNR-2 [Source:UniProtKB/TrEMBL;Acc:A0A0H5S7V6]	5e-274	99.7	365		1514	1637	1607	1538	1347	1952	1609	1808	1687	1381	1417		1715.62	1597.77	1593.99	1657.85	1539.88	1572.88	1521.02	1708.11	1508.03	1411.46	1516.25		114.3	106.559	108.33	111.35	104.815	107.839	103.933	117.605
	BPAG_0000013101	624	-	-	-	-	-		Bm10305	Y	WBGene00230566	Bm10305	Bm10305 [Source:UniProtKB/TrEMBL;Acc:A0A0J9XXN8]	7e-135	92.8	207		458	529	566	571	465	679	605	571	697	580	581		518.991	516.321	561.416	615.496	531.583	547.123	571.917	539.454	623.056	592.791	621.695		60.8422	60.5921	67.1376	72.7426	63.669	66.006	68.7658	65.3554
	BPAG_0000013201	285	-	-	-	-	-		-	-	-	-	-	-	-	-		5	3	1	3	5	8	5	5	3	6	3		5.66584	2.9281	0.991902	3.23378	5.71594	6.44622	4.72659	4.72377	2.68173	6.13232	3.21013		1.45428	0.752352	0.25971	0.836785	1.49894	1.70272	1.24431	1.25301
	BPAG_0000013301	927	-	-	-	-	-		Bm10304a	Y	WBGene00230565	Bm10304	Bm10304, isoform c; Bm10304, isoform d [Source:UniProtKB/TrEMBL;Acc:A0A1P6BGE4]	7.5e-198	89	310		1360	1593	1530	1471	1509	2043	1668	1718	1863	1484	1641		1541.11	1554.82	1517.61	1585.63	1725.07	1646.2	1576.79	1623.09	1665.36	1516.73	1755.94		121.614	122.823	122.165	126.145	139.081	133.686	127.62	132.365
	BPAG_0000013401	4329	-	GO:0004386 - MF - helicase activity	03041: Spliceosome	K13184: ATP-dependent RNA helicase A	-		Bm5650a	Y	WBGene00225911	Bma-rha-1	BMA-RHA-1, isoform f [Source:UniProtKB/TrEMBL;Acc:A0A5S6PQI8]	0	93.4	1444		2868	3437	3498	3296	3191	4441	3880	3723	4025	3510	3480		3249.93	3354.62	3469.67	3552.85	3647.92	3578.46	3667.83	3517.32	3597.99	3587.41	3723.75		54.9181	56.7462	59.809	60.5253	62.9795	62.2288	63.5691	61.4236
	BPAG_0000013501	465	-	-	-	-	-		-	-	-	-	-	-	-	-		10	8	26	17	14	12	22	15	14	14	12		11.3317	7.80826	25.7894	18.3248	16.0046	9.66933	20.797	14.1713	12.5148	14.3087	12.8405		1.78267	1.22965	4.13861	2.90625	2.57238	1.5654	3.35561	2.30392
	BPAG_0000013601	198	-	-	-	-	-		Bm545	Y	WBGene00220806	Bm545	Bm545 [Source:UniProtKB/TrEMBL;Acc:A0A0H5S9D3]	1.7e-27	73.8	65		399	430	388	343	324	514	442	414	395	341	326		452.134	419.694	384.858	369.729	370.393	414.169	417.83	391.128	353.095	348.52	348.834		167.044	155.22	145.044	137.71	139.81	157.469	158.328	149.336
	BPAG_0000013701	234	-	-	-	-	-		-	-	-	-	-	-	-	-		0	0	0	0	2	0	2	0	0	0	0		0	0	0	0	2.28638	0	1.89063	0	0	0	0		0	0	0	0	0.730254	0	0.6062	0
	BPAG_0000013801	1584	-	GO:0005515 - MF - protein binding	04010: MAPK signaling pathway; 04147: Exosome; 04510: Focal adhesion; 04812: Cytoskeleton proteins; 05132: Salmonella infection; 05205: Proteoglycans in cancer	K04437: filamin	-		Bm2319a	N	WBGene00222580	Bma-fln-2	BMA-FLN-2, isoform a; BMA-FLN-2, isoform c [Source:UniProtKB/TrEMBL;Acc:A0A0H5S7S3]	0	97.3	513		136	152	158	130	109	200	140	162	210	182	155		154.111	148.357	156.72	140.13	124.608	161.155	132.344	153.05	187.721	186.014	165.857		7.11718	6.85857	7.38306	6.52418	5.87937	7.65901	6.26866	7.30448
	BPAG_0000013901	7668	-	GO:0005515 - MF - protein binding	04010: MAPK signaling pathway; 04147: Exosome; 04510: Focal adhesion; 04812: Cytoskeleton proteins; 05132: Salmonella infection; 05205: Proteoglycans in cancer	K04437: filamin	-		Bm2319a	Y	WBGene00222580	Bma-fln-2	BMA-FLN-2, isoform a; BMA-FLN-2, isoform c [Source:UniProtKB/TrEMBL;Acc:A0A0H5S7S3]	0	96.6	2539		9276	11738	11236	10672	10729	14600	12827	12188	13582	11758	11541		10511.3	11456.7	11145	11503.6	12265.3	11764.3	12125.6	11514.7	12141.1	12017.3	12349.4		100.277	109.41	108.459	110.637	119.547	115.496	118.644	113.522
	BPAG_0000014001	831	IPR000301: Tetraspanin; IPR008952: Tetraspanin, EC2 domain superfamily; IPR018499: Tetraspanin/Peripherin; IPR018503: Tetraspanin, conserved site	GO:0016021 - CC - integral component of membrane	99992: Structural proteins	K17353: tetraspanin-18	-		Bm1851	Y	WBGene00222112	Bma-tsp-11	Tetraspanin [Source:UniProtKB/TrEMBL;Acc:A0A4E9F4L3]	7.3e-204	99.6	276		273	322	269	255	230	316	295	320	493	485	323		309.355	314.282	266.822	274.871	262.933	254.626	278.869	302.321	440.698	495.696	345.624		27.2324	27.6949	23.9599	24.3936	23.6476	23.0666	25.1781	27.5029
	BPAG_0000014101	558	-	-	-	-	-		Bm10302	Y	WBGene00230563	Bm10302	Bm10302 [Source:UniProtKB/TrEMBL;Acc:A0A0H5S8U6]	2.1e-45	74	96		889	982	934	952	817	1107	931	917	926	749	679		1007.39	958.464	926.436	1026.19	933.985	891.995	880.09	866.339	827.762	765.518	726.559		132.066	125.783	123.893	135.625	125.097	120.34	118.336	117.372
	BPAG_0000014201	1068	-	GO:0003924 - MF - GTPase activity; GO:0004871 - MF - signal transducer activity; GO:0005525 - MF - GTP binding; GO:0007165 - BP - signal transduction; GO:0007186 - BP - G-protein coupled receptor signaling pathway; GO:0007188 - BP - adenylate cyclase-modulating G-protein coupled receptor signaling pathway; GO:0019001 - MF - guanyl nucleotide binding; GO:0031683 - MF - G-protein beta/gamma-subunit…	04015: Rap1 signaling pathway; 04031: GTP-binding proteins; 04147: Exosome; 04361: Axon regeneration; 04713: Circadian entrainment; 04723: Retrograde endocannabinoid signaling; 04724: Glutamatergic synapse; 04725: Cholinergic synapse; 04726: Serotonergic synapse; 04727: GABAergic synapse; 04728: Dopaminergic synapse; 04730: Long-term depression; 04915: Estrogen signaling pathway; 04916: Melanogen…	K04534: guanine nucleotide-binding protein G(o) subunit alpha	-		Bm3092a	Y	WBGene00223353	Bma-gpa-3	BMA-GPA-3 [Source:UniProtKB/TrEMBL;Acc:A0A5S6PJ51]	2.4e-260	100	355		104	103	112	102	116	154	143	115	109	137	98		117.85	100.531	111.093	109.949	132.61	124.09	135.18	108.647	97.4363	140.021	104.864		8.0721	6.89304	7.76213	7.59218	9.27997	8.74677	9.49657	7.69053
	BPAG_0000014301	2010	IPR000717: Proteasome component (PCI) domain; IPR019585: 26S proteasome regulatory subunit Rpn7/COP9 signalosome complex subunit 1; IPR036390: Winged helix DNA-binding domain superfamily	GO:0005515 - MF - protein binding	04121: Ubiquitin system	K12175: COP9 signalosome complex subunit 1	-		Bm6923a	Y	WBGene00227184	Bma-csn-1	G protein pathway suppressor 1, putative [Source:UniProtKB/TrEMBL;Acc:A0A4E9FQH4]	0	98.2	669		2692	3068	3062	2855	2810	4016	3293	3242	3658	2840	2871		3050.49	2994.47	3037.2	3077.48	3212.36	3236	3112.93	3062.89	3269.93	2902.63	3072.09		111.021	109.095	112.757	112.914	119.446	121.198	116.198	115.198
	BPAG_0000014401	2046	IPR001214: SET domain; IPR026489: CXC domain; IPR033467: Tesmin/TSO1-like CXC domain	GO:0005515 - MF - protein binding	00310: Lysine degradation; 03036: Chromosome and associated proteins; 05206: MicroRNAs in cancer	K11430: histone-lysine N-methyltransferase EZH2	-		Bm5240a	Y	WBGene00225501	Bma-mes-2	SET domain containing protein [Source:UniProtKB/TrEMBL;Acc:A0A4E9FNT5]	0	99.7	676		2130	2525	2577	2320	2344	3271	2838	2630	2903	2680	2551		2413.65	2464.48	2556.13	2500.79	2679.63	2635.7	2682.81	2484.7	2595.02	2739.1	2729.68		86.2975	88.2065	93.2273	90.1405	97.884	96.9779	98.3804	91.8079
	BPAG_0000014501	1293	-	-	-	-	-		Bm2898	Y	WBGene00223159	Bma-cyl-1.2	Cyclin N-terminal domain-containing protein [Source:UniProtKB/TrEMBL;Acc:A0A4E9FPD2]	2.4e-127	98.9	189		6221	7021	6885	6513	5786	8368	6911	6567	7008	6183	5734		7049.44	6852.72	6829.24	7020.54	6614.49	6742.74	6533.09	6204.19	6264.53	6319.36	6135.63		398.828	388.101	394.13	400.424	382.331	392.574	379.092	362.742
	BPAG_0000014601	3852	-	-	03036: Chromosome and associated proteins	K16478: nephrocystin-4	-		Bm5387	Y	WBGene00225648	Bma-nphp-4	BMA-NPHP-4 [Source:UniProtKB/TrEMBL;Acc:A0A0H5S6M1]	0	95	1283		332	414	423	372	384	498	446	424	370	453	404		376.212	404.077	419.574	400.989	438.985	401.277	421.611	400.575	330.747	462.99	432.297		7.14457	7.68173	8.12809	7.67705	8.51735	7.84226	8.21203	7.86157
	BPAG_0000014701	1230	IPR000863: Sulfotransferase domain; IPR027417: P-loop containing nucleoside triphosphate hydrolase	GO:0008146 - MF - sulfotransferase activity	-	-	-		Bm7300a	Y	WBGene00227561	Bma-ssu-1	BMA-SSU-1, isoform c [Source:UniProtKB/TrEMBL;Acc:A0A5S6PUZ6]	3.5e-302	92.8	432		791	1066	920	619	673	962	778	1076	849	881	566		896.336	1040.45	912.55	667.237	769.366	775.158	735.457	1016.55	758.93	900.429	605.644		53.3084	61.9437	55.3627	40.0058	46.7487	47.4425	44.8618	62.4794
	BPAG_0000014801	201	-	-	-	-	-		-	-	-	-	-	-	-	-		2	6	7	4	5	8	3	7	6	5	3		2.26634	5.8562	6.94331	4.31171	5.71594	6.44622	2.83595	6.61327	5.36347	5.11027	3.21013		0.824818	2.13354	2.57772	1.58198	2.12537	2.4143	1.05859	2.48732
	BPAG_0000014901	1071	-	GO:0003924 - MF - GTPase activity; GO:0004871 - MF - signal transducer activity; GO:0005525 - MF - GTP binding; GO:0007165 - BP - signal transduction; GO:0007186 - BP - G-protein coupled receptor signaling pathway; GO:0007188 - BP - adenylate cyclase-modulating G-protein coupled receptor signaling pathway; GO:0019001 - MF - guanyl nucleotide binding; GO:0031683 - MF - G-protein beta/gamma-subunit…	04015: Rap1 signaling pathway; 04031: GTP-binding proteins; 04147: Exosome; 04361: Axon regeneration; 04713: Circadian entrainment; 04723: Retrograde endocannabinoid signaling; 04724: Glutamatergic synapse; 04725: Cholinergic synapse; 04726: Serotonergic synapse; 04727: GABAergic synapse; 04728: Dopaminergic synapse; 04730: Long-term depression; 04915: Estrogen signaling pathway; 04916: Melanogen…	K04534: guanine nucleotide-binding protein G(o) subunit alpha	-		Bm2569a	Y	WBGene00222830	Bma-odr-3	BMA-ODR-3 [Source:UniProtKB/TrEMBL;Acc:A0A0H5S6D9]	4e-255	100	356		511	659	636	424	446	594	587	576	547	470	495		579.049	643.205	630.849	457.041	509.862	478.632	554.901	544.178	488.969	480.365	529.671		39.5508	43.9785	43.9543	31.4712	35.5799	33.643	38.8732	38.4116
	BPAG_0000015001	1380	IPR016095: Ribosomal protein L1, 3-layer alpha/beta-sandwich; IPR023674: Ribosomal protein L1-like; IPR028364: Ribosomal protein L1/ribosomal biogenesis protein	-	03009: Ribosome biogenesis	K14775: ribosome biogenesis protein UTP30	-		Bm4311	Y	WBGene00224572	Bm4311	Bm4311 [Source:UniProtKB/TrEMBL;Acc:A0A0K0JE32]	2.6e-310	98.3	459		1905	2202	2012	1942	1742	2358	2046	2033	1975	1878	1789		2158.69	2149.22	1995.71	2093.33	1991.43	1900.02	1934.12	1920.68	1765.47	1919.42	1914.31		114.43	114.047	107.915	111.868	107.852	103.648	105.155	105.218
	BPAG_0000015101	1020	IPR024974: Sde2 N-terminal domain	-	-	-	-		Bm4312	Y	WBGene00224573	Bm4312	Sde2_N_Ubi domain-containing protein [Source:UniProtKB/TrEMBL;Acc:A0A4E9FNS5]	6e-204	91	333		2054	2390	2145	2129	1895	2596	2284	2191	2382	2090	1892		2327.53	2332.72	2127.63	2294.91	2166.34	2091.8	2159.1	2069.95	2129.3	2136.09	2024.52		166.926	167.472	155.654	165.925	158.734	154.384	158.817	153.416
	BPAG_0000015201	2472	IPR000571: Zinc finger, CCCH-type; IPR003593: AAA+ ATPase domain; IPR003959: ATPase, AAA-type, core; IPR003960: ATPase, AAA-type, conserved site; IPR027417: P-loop containing nucleoside triphosphate hydrolase; IPR036855: Zinc finger, CCCH-type superfamily	GO:0005524 - MF - ATP binding; GO:0046872 - MF - metal ion binding	99980: Enzymes with EC numbers	K22530: -	-		Bm4799	Y	WBGene00225060	Bma-mspn-1	AAA domain-containing protein [Source:UniProtKB/TrEMBL;Acc:A0A4E9FQ85]	1.5e-246	99.4	353		13522	15366	13503	13378	11399	16261	14149	14237	15638	12891	13061		15322.7	14997.7	13393.6	14420.5	13031.2	13102.7	13375.3	13450.5	13979	13175.3	13975.8		453.437	444.28	404.311	430.21	393.984	399.022	405.956	411.339
	BPAG_0000015301	1554	-	GO:0003896 - MF - DNA primase activity; GO:0006269 - BP - DNA replication, synthesis of RNA primer; GO:0016779 - MF - nucleotidyltransferase activity	03030: DNA replication; 03032: DNA replication proteins	K02685: DNA primase large subunit	-		Bm6140	Y	WBGene00226401	Bma-pri-2	DNA primase large subunit [Source:UniProtKB/TrEMBL;Acc:A0A4E9FSA9]	0	98.5	517		1035	1113	1008	1052	916	1132	1065	1015	1051	1067	879		1172.83	1086.32	999.837	1133.98	1047.16	912.14	1006.76	958.925	939.5	1090.53	940.568		55.2095	51.1905	48.0113	53.8149	50.3621	44.1869	48.6072	46.6493
	BPAG_0000015401	1380	IPR002483: PWI domain; IPR036483: PWI domain superfamily	GO:0006397 - BP - mRNA processing	03040: Spliceosome; 03041: Spliceosome	K12822: RNA-binding protein 25	-		Bm6182	Y	WBGene00226443	Bma-rbm-25	Bm6182 [Source:UniProtKB/TrEMBL;Acc:A0A0H5S6R6]	5.3e-234	92.8	414		2553	3237	2977	2797	2734	3765	3204	3006	2862	2890	2674		2892.98	3159.42	2952.89	3014.96	3125.48	3033.75	3028.8	2839.93	2558.37	2953.73	2861.3		153.354	167.652	159.674	161.121	169.27	165.495	164.67	155.575
	BPAG_0000015501	723	IPR000504: RNA recognition motif domain; IPR012677: Nucleotide-binding alpha-beta plait domain superfamily; IPR034268: RBM25, RNA recognition motif; IPR035979: RNA-binding domain superfamily	GO:0003676 - MF - nucleic acid binding	03040: Spliceosome; 03041: Spliceosome	K12822: RNA-binding protein 25	-		Bm6182	N	WBGene00226443	Bma-rbm-25	Bm6182 [Source:UniProtKB/TrEMBL;Acc:A0A0H5S6R6]	1.3e-138	90.7	237		529	615	684	567	665	852	786	721	713	670	685		599.446	600.26	678.461	611.184	760.221	686.522	743.019	681.167	637.359	684.776	732.98		60.6515	60.7969	70.0248	62.3422	78.5856	71.4824	77.1056	71.2241
	BPAG_0000015601	1053	-	GO:0003676 - MF - nucleic acid binding; GO:0003723 - MF - RNA binding	03009: Ribosome biogenesis	K06961: ribosomal RNA assembly protein	-		Bm13994	Y	WBGene00234255	Bma-krr-1	KRR1 small subunit processome component [Source:UniProtKB/TrEMBL;Acc:A0A0H5S8P5]	6.5e-242	99.7	350		1022	1342	1157	1177	892	1433	1187	1282	1223	1098	1034		1158.1	1309.84	1147.63	1268.72	1019.72	1154.68	1122.09	1211.17	1093.25	1122.21	1106.42		80.4538	91.0896	81.3278	88.8558	72.3763	82.5498	79.951	86.954
	BPAG_0000015701	402	-	-	-	-	-		Bm14205	Y	WBGene00234466	Bm14205	Bm14205 [Source:UniProtKB/TrEMBL;Acc:A0A0H5S800]	1.7e-48	92	88		23	29	26	12	14	29	19	17	28	22	17		26.0629	28.3049	25.7894	12.9351	16.0046	23.3675	17.961	16.0608	25.0295	22.4852	18.1907		4.7427	5.15605	4.7872	2.37297	2.97551	4.37593	3.3522	3.02032
	BPAG_0000015801	857	-	GO:0005515 - MF - protein binding	04147: Exosome	K17254: syntenin-1	-		Bm9936	Y	WBGene00230197	Bm9936	Bm9936 [Source:UniProtKB/TrEMBL;Acc:A0A0J9XVG1]	9.1e-173	93.3	267		331	347	372	342	264	431	319	320	356	309	309		375.079	338.683	368.987	368.651	301.802	347.29	301.556	302.321	318.232	315.814	330.643		32.0163	28.9397	32.1289	31.7236	26.3198	30.5066	26.4005	26.6685
	BPAG_0000015901	225	-	-	00260: Glycine, serine and threonine metabolism; 00620: Pyruvate metabolism; 00630: Glyoxylate and dicarboxylate metabolism	K00049: glyoxylate/hydroxypyruvate reductase	-		-	-	-	-	-	-	-	-		23	48	35	46	33	48	42	30	42	49	38		26.0629	46.8496	34.7166	49.5846	37.7252	38.6773	39.7033	28.3426	37.5443	50.0806	40.6616		8.47363	15.2477	11.5138	16.2522	12.5312	12.9407	13.2394	9.52288
	BPAG_0000016001	3261	IPR022188: Protein of unknown function DUF3715	-	-	-	-		Bm9937a	Y	WBGene00230198	Bm9937	Bm9937, isoform a [Source:UniProtKB/TrEMBL;Acc:A0A0H5S7V2]	0	92.5	1092		2352	2758	2797	2713	2688	3974	3516	3254	3788	3361	3107		2665.21	2691.9	2774.35	2924.41	3072.89	3202.16	3323.74	3074.23	3386.13	3435.12	3324.62		59.7875	60.4489	63.4857	66.1358	70.4268	73.9222	76.4715	71.2683
	BPAG_0000016101	2829	IPR002934: Polymerase, nucleotidyl transferase domain; IPR007010: Poly(A) polymerase, RNA-binding domain; IPR007012: Poly(A) polymerase, central domain; IPR011068: Nucleotidyltransferase, class I-like, C-terminal	GO:0003723 - MF - RNA binding; GO:0004652 - MF - polynucleotide adenylyltransferase activity; GO:0016779 - MF - nucleotidyltransferase activity; GO:0031123 - BP - RNA 3'-end processing; GO:0043631 - BP - RNA polyadenylation	03015: mRNA surveillance pathway; 03019: Messenger RNA biogenesis	K14376: poly(A) polymerase	-		Bm6348a	Y	WBGene00226609	Bm6348	Poly(A) polymerase [Source:UniProtKB/TrEMBL;Acc:A0A5S6PS30]	0	89.4	817		2072	2197	2367	2387	2201	3105	2623	2591	2688	2477	2479		2347.93	2144.34	2347.83	2573.01	2516.16	2501.94	2479.57	2447.86	2402.83	2531.63	2652.64		60.7129	55.5063	61.9298	67.0744	66.4732	66.5774	65.7608	65.413
	BPAG_0000016201	5484	IPR011989: Armadillo-like helical; IPR016024: Armadillo-type fold; IPR024372: Proteasome component Ecm29; IPR032878: Vacuole morphology and inheritance protein 14, Fab1-binding region	GO:0005488 - MF - binding; GO:0032947 - MF - protein complex scaffold; GO:0043248 - BP - proteasome assembly	03051: Proteasome	K11886: proteasome component ECM29	-		Bm3047	Y	WBGene00223308	Bm3047	Bm3047 [Source:UniProtKB/TrEMBL;Acc:A0A0K0J8L7]	0	97	1827		3378	4047	4045	3828	3909	5504	4697	4591	4130	4298	4216		3827.84	3950	4012.24	4126.3	4468.73	4435	4440.15	4337.36	3691.85	4392.79	4511.3		51.0607	52.7449	54.5953	55.4896	60.9015	60.8806	60.747	59.7915
	BPAG_0000016301	1572	-	-	03400: DNA repair and recombination proteins	K15341: DNA cross-link repair 1B protein	-		Bm3945	Y	WBGene00224206	Bm3945	Bm3945 [Source:UniProtKB/TrEMBL;Acc:A0A0K0JCI3]	0	90.6	554		1641	1950	1945	1787	1782	2617	2097	2201	2058	1718	1801		1859.53	1903.26	1929.25	1926.25	2037.16	2108.72	1982.33	2079.4	1839.67	1755.89	1927.15		86.5327	88.6598	91.5801	90.3669	96.8534	100.983	94.6123	99.9994
	BPAG_0000016401	2028	IPR000322: Glycoside hydrolase family 31; IPR011013: Galactose mutarotase-like domain superfamily; IPR017853: Glycoside hydrolase superfamily; IPR025887: Glycoside hydrolase family 31, N-terminal domain	GO:0003824 - MF - catalytic activity; GO:0004553 - MF - hydrolase activity, hydrolyzing O-glycosyl compounds; GO:0005975 - BP - carbohydrate metabolic process; GO:0030246 - MF - carbohydrate binding	00510: N-Glycan biosynthesis; 04141: Protein processing in endoplasmic reticulum	K05546: alpha 1,3-glucosidase	-		Bm4256	Y	WBGene00224517	Bma-aagr-4	Gal_mutarotas_2 domain-containing protein [Source:UniProtKB/TrEMBL;Acc:A0A4E9FQZ3]	0	99	675		1889	2335	2270	2039	2166	3131	2652	2573	2574	2177	2290		2140.56	2279.04	2251.62	2197.89	2476.15	2522.89	2506.98	2430.85	2300.93	2225.01	2450.4		77.2126	82.2932	82.8499	79.9258	91.2537	93.6512	92.7486	90.6153
	BPAG_0000016501	384	IPR003609: PAN/Apple domain	-	-	-	-		Bm6373a	Y	WBGene00226634	Bm6373	Bm6373 [Source:UniProtKB/TrEMBL;Acc:A0A5S6PSM5]	3.2e-93	97.6	127		799	820	924	811	705	1167	932	945	1100	975	863		905.402	800.347	916.517	874.199	805.948	940.342	881.036	892.792	983.302	996.502	923.447		172.48	152.626	178.105	167.891	156.862	184.348	172.142	175.764
	BPAG_0000016601	768	IPR001612: Caveolin	GO:0070836 - BP - caveola assembly	-	-	-		Bm5771	Y	WBGene00226032	Bma-cav-1	BMA-CAV-1 [Source:UniProtKB/TrEMBL;Acc:A0A0K0JKA3]	3.5e-155	92.2	255		2000	2277	1959	2088	1703	2285	1928	1935	2051	1783	1459		2266.34	2222.43	1943.14	2250.71	1946.85	1841.2	1822.57	1828.1	1833.41	1822.32	1561.19		215.87	211.908	188.802	216.126	189.458	180.477	178.052	179.949
	BPAG_0000016701	921	-	GO:0005743 - CC - mitochondrial inner membrane; GO:0022857 - MF - transmembrane transporter activity; GO:0055085 - BP - transmembrane transport	02000: Transporters; 04714: Thermogenesis	K15109: solute carrier family 25 (mitochondrial carnitine/acylcarnitine transporter), member 20/29	-		Bm13761	Y	WBGene00234022	Bma-dif-1	BMA-DIF-1 [Source:UniProtKB/TrEMBL;Acc:A0A0H5SHY6]	3.7e-228	99.3	306		501	548	600	530	537	748	685	690	714	611	518		567.717	534.866	595.141	571.301	613.892	602.721	647.542	651.88	638.252	624.475	554.282		45.0923	42.5271	48.2198	45.7461	49.8166	49.2652	52.7512	53.5081
	BPAG_0000016801	1527	-	GO:0004605 - MF - phosphatidate cytidylyltransferase activity	00564: Glycerophospholipid metabolism; 04070: Phosphatidylinositol signaling system	K00981: phosphatidate cytidylyltransferase	-		Bm12416a	Y	WBGene00232677	Bma-cdgs-1	Phosphatidate cytidylyltransferase [Source:UniProtKB/TrEMBL;Acc:A0A4E9EUM1]	0	92.3	493		1301	1690	1703	1509	1474	2189	1886	1890	1915	1712	1624		1474.25	1649.5	1689.21	1626.59	1685.06	1763.85	1782.87	1785.58	1711.84	1749.76	1737.75		70.6257	79.1029	82.5486	78.5575	82.4742	86.957	87.6001	88.4001
	BPAG_0000016901	897	IPR032763: Resistance to inhibitors of cholinesterase protein 3, N-terminal	-	-	-	-		Bm5782	Y	WBGene00226043	Bma-ric-3	RIC3 domain-containing protein [Source:UniProtKB/TrEMBL;Acc:A0A4E9ETG8]	3.7e-130	93.9	213		1543	1709	1620	1449	1283	1608	1441	1422	1644	1342	1260		1748.48	1668.04	1606.88	1561.92	1466.71	1295.69	1362.2	1343.44	1469.59	1371.6	1348.25		142.593	136.174	133.677	128.414	122.206	108.741	113.939	113.224
	BPAG_0000017001	4563	-	GO:0005515 - MF - protein binding	-	-	-		Bm2376a	Y	WBGene00222637	Bm2376	Bm2376 [Source:UniProtKB/TrEMBL;Acc:A0A5S6PHJ9]	0	96.4	1520		6302	7340	6843	6491	6530	9219	7683	8142	7962	7137	7183		7141.23	7164.08	6787.58	6996.82	7465.02	7428.46	7262.87	7692.18	7117.32	7294.4	7686.12		114.486	114.972	111.002	113.083	122.271	122.555	119.421	127.441
	BPAG_0000017101	1473	IPR000953: Chromo/chromo shadow domain; IPR002717: Histone acetyltransferase domain, MYST-type; IPR016181: Acyl-CoA N-acyltransferase; IPR016197: Chromo-like domain superfamily; IPR025995: RNA binding activity-knot of a chromodomain; IPR036388: Winged helix-like DNA-binding domain superfamily	GO:0004402 - MF - histone acetyltransferase activity; GO:0006355 - BP - regulation of transcription, DNA-templated; GO:0016573 - BP - histone acetylation	03036: Chromosome and associated proteins	K11308: histone acetyltransferase MYST1	-		Bm5266a	Y	WBGene00225527	Bma-mys-2.1	Histone acetyltransferase [Source:UniProtKB/TrEMBL;Acc:A0A5S6PPT9]	4.5e-308	89.2	474		2021	2253	2322	2274	2121	3076	2408	2506	2894	2492	2205		2290.13	2199	2303.2	2451.21	2424.7	2478.57	2276.32	2367.55	2586.98	2546.96	2359.45		113.733	109.321	116.679	122.723	123.026	126.672	115.946	121.509
	BPAG_0000017201	2193	IPR035979: RNA-binding domain superfamily	GO:0003676 - MF - nucleic acid binding	-	-	-		Bm5770	Y	WBGene00226031	Bma-sna-2	BMA-SNA-2 [Source:UniProtKB/TrEMBL;Acc:A0A0K0JKA2]	0	96.4	730		2320	2564	2470	2537	2355	3421	2824	2911	3062	2602	2600		2628.95	2502.55	2450	2734.7	2692.21	2756.56	2669.58	2750.18	2737.16	2659.38	2782.11		87.6947	83.565	83.3667	91.9643	91.7513	94.6264	91.333	94.8055
	BPAG_0000017301	1446	IPR001841: Zinc finger, RING-type; IPR002867: IBR domain; IPR013083: Zinc finger, RING/FYVE/PHD-type	-	04121: Ubiquitin system	K11969: ariadne-2	-		Bm956	Y	WBGene00221217	Bma-ari-2	RBR-type E3 ubiquitin transferase [Source:UniProtKB/TrEMBL;Acc:A0A4E9ETF7]	0	99	481		1037	1135	1182	1271	1119	1634	1367	1405	1545	1351	1238		1175.1	1107.8	1172.43	1370.04	1279.23	1316.64	1292.25	1327.38	1381.09	1380.79	1324.71		59.4476	56.1012	60.5039	69.8739	66.1183	68.546	67.0505	69.3965
	BPAG_0000017401	513	-	-	-	-	-		-	-	-	-	-	-	-	-		14	20	29	31	24	27	28	23	24	18	19		15.8644	19.5207	28.7651	33.4157	27.4365	21.756	26.4689	21.7293	21.4539	18.397	20.3308		2.26222	2.78649	4.18422	4.80377	3.99718	3.1926	3.87117	3.20214
	BPAG_0000017501	243	-	-	-	-	-		Bm17955	Y	WBGene00269097	Bm17955	-	9.9e-44	96.2	78		2	2	2	0	2	5	4	6	1	0	4		2.26634	1.95207	1.9838	0	2.28638	4.02889	3.78127	5.66852	0.893911	0	4.28017		0.682257	0.588259	0.609197	0	0.703208	1.24814	1.1675	1.7635
	BPAG_0000017601	1668	IPR001781: Zinc finger, LIM-type; IPR010442: PET domain; IPR033724: PET testin	GO:0008270 - MF - zinc ion binding	-	-	-		Bm1834	Y	WBGene00222095	Bma-tes-1	BMA-TES-1 [Source:UniProtKB/TrEMBL;Acc:A0A0H5S3R6]	0	90.5	493		1223	1462	1367	1402	1209	1871	1569	1460	1707	1525	1431		1385.87	1426.96	1355.93	1511.25	1382.12	1507.61	1483.2	1379.34	1525.91	1558.63	1531.23		60.7792	62.6464	60.6606	66.8174	61.9284	68.0418	66.7158	62.5153
	BPAG_0000017701	1176	-	GO:0000139 - CC - Golgi membrane; GO:0015165 - MF - pyrimidine nucleotide-sugar transmembrane transporter activity; GO:0016021 - CC - integral component of membrane; GO:0090481 - BP - pyrimidine nucleotide-sugar transmembrane transport	02000: Transporters	K15272: solute carrier family 35 (UDP-sugar transporter), member A1/2/3	-		Bm5062a	Y	WBGene00225323	Bma-srf-3	BMA-SRF-3, isoform d; BMA-SRF-3, isoform e [Source:UniProtKB/TrEMBL;Acc:A0A1P6C3B9]	1.7e-244	91.8	391		140	171	169	166	173	216	186	199	228	202	153		158.644	166.902	167.631	178.936	197.772	174.048	175.829	188.006	203.812	206.455	163.717		9.86836	10.3928	10.6369	11.2212	12.5689	11.1415	11.2178	12.0858
	BPAG_0000017801	183	-	-	-	-	-		Bm4218	N	WBGene00224479	Bm4218	Bm4218 [Source:UniProtKB/TrEMBL;Acc:A0A0J9XQJ8]	6e-09	95.5	22		48	61	64	60	53	86	74	65	98	72	49		54.3921	59.538	63.4817	64.6756	60.589	69.2968	69.9535	61.409	87.6033	73.5878	52.4321		21.7427	23.8245	25.8859	26.0638	24.7448	28.5066	28.6802	25.3683
	BPAG_0000017901	195	IPR015157: Translation machinery associated TMA7	-	-	-	-		Bm4218	Y	WBGene00224479	Bm4218	Bm4218 [Source:UniProtKB/TrEMBL;Acc:A0A0J9XQJ8]	3.7e-36	100	64		1784	2092	2094	1771	1449	1934	1755	1728	1953	1595	1483		2021.57	2041.86	2077.04	1909.01	1656.48	1558.37	1659.03	1632.53	1745.81	1630.18	1586.87		758.376	766.782	794.834	721.974	634.883	601.617	638.329	632.906
	BPAG_0000018001	1230	IPR006368: GDP-mannose 4,6-dehydratase; IPR016040: NAD(P)-binding domain; IPR036291: NAD(P)-binding domain superfamily	GO:0008446 - MF - GDP-mannose 4,6-dehydratase activity; GO:0019673 - BP - GDP-mannose metabolic process	00051: Fructose and mannose metabolism; 00520: Amino sugar and nucleotide sugar metabolism	K01711: GDPmannose 4,6-dehydratase	-		Bm2907a	Y	WBGene00223168	Bm2907	Bm2907, isoform a [Source:UniProtKB/TrEMBL;Acc:A0A0J9XQ37]	1.5e-276	94.1	409		1550	1724	1662	1424	1196	1722	1568	1424	1629	1407	1316		1756.41	1682.68	1648.54	1534.97	1367.25	1387.55	1482.26	1345.33	1456.18	1438.03	1408.18		104.46	100.179	100.014	92.0327	83.078	84.9232	90.4155	82.6865
	BPAG_0000018101	654	IPR013657: UAA transporter	GO:0055085 - BP - transmembrane transport	-	-	-		Bm312a	Y	WBGene00220573	Bm312	-	2.8e-47	83.7	86		665	900	886	730	818	1085	1010	1011	876	907	839		753.557	878.429	878.825	786.886	935.128	874.268	954.77	955.146	783.066	927.002	897.766		84.2885	98.358	100.274	88.7325	106.865	100.635	109.533	110.409
	BPAG_0000018201	2286	IPR001680: WD40 repeat; IPR001810: F-box domain; IPR007177: Ribosome biogenesis protein, C-terminal; IPR007209: RNase L inhibitor RLI, possible metal-binding domain; IPR015943: WD40/YVTN repeat-like-containing domain superfamily; IPR017986: WD40-repeat-containing domain; IPR019775: WD40 repeat, conserved site; IPR020472: G-protein beta WD-40 repeat; IPR022968: Ribosome biogenesis protein; IPR0360…	GO:0005515 - MF - protein binding	04120: Ubiquitin mediated proteolysis; 04121: Ubiquitin system; 04131: Membrane trafficking	K10260: F-box and WD-40 domain protein 7	-		Bm18118	Y	WBGene00269258	Bm18118	-	2.8e-195	96.9	487		3136	3447	3334	3174	2850	4119	3645	3511	3621	3163	2843		3553.62	3364.38	3307	3421.34	3258.09	3319	3445.68	3317.03	3236.85	3232.75	3042.13		113.717	107.773	107.95	110.374	106.519	109.298	113.09	109.694
	BPAG_0000018301	824	IPR013216: Methyltransferase type 11; IPR029063: S-adenosyl-L-methionine-dependent methyltransferase	GO:0008152 - BP - metabolic process; GO:0008168 - MF - methyltransferase activity	-	-	-		Bm4217a	Y	WBGene00224478	Bm4217	Methyltransf_11 domain-containing protein [Source:UniProtKB/TrEMBL;Acc:A0A4E9ETE6]	1e-204	98.2	273		102	101	112	89	80	129	97	100	135	88	89		115.583	98.5793	111.093	95.9355	91.4551	103.945	91.6958	94.4753	120.678	89.9407	95.2338		10.2612	8.7607	10.0606	8.58619	8.29512	9.49643	8.34923	8.66767
	BPAG_0000018401	1437	IPR000008: C2 domain; IPR002035: von Willebrand factor, type A; IPR010734: Copine; IPR035892: C2 domain superfamily; IPR036465: von Willebrand factor A-like domain superfamily; IPR037768: Copine, C2B domain	-	-	-	-		Bm1879	Y	WBGene00222140	Bma-cpna-3	BMA-CPNA-3 [Source:UniProtKB/TrEMBL;Acc:A0A0H5S579]	0	98.7	473		2145	2664	2482	2180	2065	2848	2520	2440	2582	2248	2222		2430.65	2600.15	2461.9	2349.88	2360.68	2294.85	2382.2	2305.2	2308.08	2297.58	2377.64		123.736	132.502	127.844	120.597	122.779	120.221	124.379	121.273
	BPAG_0000018501	1782	-	GO:0005515 - MF - protein binding	-	-	-		Bm7532	Y	WBGene00227793	Bma-lron-2	BMA-LRON-2 [Source:UniProtKB/TrEMBL;Acc:A0A0H5S401]	1.5e-289	96.3	590		406	458	419	382	381	477	432	379	472	387	365		460.066	447.023	415.607	411.768	435.555	384.356	408.377	358.062	421.926	395.535	390.566		18.8861	18.3697	17.4037	17.0409	18.2674	16.2371	17.194	15.1901
	BPAG_0000018601	1008	-	-	03400: DNA repair and recombination proteins	K19619: -	-		Bm6959	Y	WBGene00227220	Bma-tdpt-1	BMA-TDPT-1 [Source:UniProtKB/TrEMBL;Acc:A0A0H5S5F6]	4.2e-241	96.5	341		1015	1174	1251	1118	1111	1525	1264	1354	1210	1021	1098		1150.17	1145.86	1240.87	1205.12	1270.08	1228.81	1194.88	1279.2	1081.63	1043.52	1174.91		83.4699	83.2439	91.861	88.1696	94.1702	91.7714	88.9382	95.9374
	BPAG_0000018701	2103	IPR001412: Aminoacyl-tRNA synthetase, class I, conserved site; IPR002305: Aminoacyl-tRNA synthetase, class Ic; IPR002307: Tyrosine-tRNA ligase; IPR014729: Rossmann-like alpha/beta/alpha sandwich fold; IPR023128: Protein N-terminal glutamine amidohydrolase, alpha beta roll; IPR037132: Protein N-terminal glutamine amidohydrolase, alpha beta roll superfamily	GO:0000166 - MF - nucleotide binding; GO:0004812 - MF - aminoacyl-tRNA ligase activity; GO:0004831 - MF - tyrosine-tRNA ligase activity; GO:0005524 - MF - ATP binding; GO:0005737 - CC - cytoplasm; GO:0006418 - BP - tRNA aminoacylation for protein translation; GO:0006437 - BP - tyrosyl-tRNA aminoacylation; GO:0016811 - MF - hydrolase activity, acting on carbon-nitrogen (but not peptide) bonds, in …	00970: Aminoacyl-tRNA biosynthesis; 01007: Amino acid related enzymes; 03016: Transfer RNA biogenesis; 03029: Mitochondrial biogenesis	K01866: tyrosyl-tRNA synthetase	-		Bm13961a	Y	WBGene00234222	Bma-yars-2	Tyrosine--tRNA ligase [Source:UniProtKB/TrEMBL;Acc:A0A4E9EVN9]	1.8e-299	86.1	495		2484	3022	2857	2661	2503	3424	2957	2891	2893	2322	2358		2814.79	2949.57	2833.86	2868.36	2861.4	2758.98	2795.3	2731.28	2586.08	2373.21	2523.16		97.9121	102.707	100.555	100.587	101.691	98.7626	99.7272	98.1835
	BPAG_0000018801	1572	-	GO:0005515 - MF - protein binding	03036: Chromosome and associated proteins	K10751: chromatin assembly factor 1 subunit B	-		Bm7051	Y	WBGene00227312	Bma-chaf-2	WD_REPEATS_REGION domain-containing protein [Source:UniProtKB/TrEMBL;Acc:A0A4E9EY06]	0	97.7	523		1472	1969	1863	1828	1681	2519	2020	2039	2324	1914	1834		1668.02	1921.81	1847.91	1970.45	1921.7	2029.75	1909.54	1926.35	2077.45	1956.21	1962.46		77.621	89.5237	87.7192	92.4402	91.364	97.2017	91.1382	92.6391
	BPAG_0000018901	834	-	-	-	-	-		Bm5230a	Y	WBGene00225491	Bm5230	Bm5230 [Source:UniProtKB/TrEMBL;Acc:A0A0H5SHP7]	2.4e-94	100	145		106	150	110	145	109	208	160	145	226	171	174		120.116	146.405	109.109	156.299	124.608	167.602	151.251	136.989	202.024	174.771	186.188		10.5357	12.8549	9.7625	13.821	11.1666	15.1285	13.6068	12.4174
	BPAG_0000019001	1308	IPR000651: Ras-like guanine nucleotide exchange factor, N-terminal; IPR001895: Ras guanine-nucleotide exchange factors catalytic domain; IPR023578: Ras guanine nucleotide exchange factor domain superfamily; IPR036964: Ras guanine-nucleotide exchange factor catalytic domain superfamily	GO:0005085 - MF - guanyl-nucleotide exchange factor activity; GO:0007264 - BP - small GTPase mediated signal transduction	-	-	-		Bm5234a	Y	WBGene00225495	Bm5234	Bm5234 [Source:UniProtKB/TrEMBL;Acc:A0A5S6PPX0]	0	97.5	435		100	120	116	103	94	125	106	116	86	107	99		113.317	117.124	115.061	111.026	107.46	100.722	100.204	109.591	76.8763	109.36	105.934		6.33748	6.5572	6.56424	6.25989	6.14016	5.79696	5.74778	6.33403
	BPAG_0000019101	2169	IPR010734: Copine	-	-	-	-		Bm7119	Y	WBGene00227380	Bma-cpna-4	Copine domain-containing protein [Source:UniProtKB/TrEMBL;Acc:A0A4E9EU88]	0	83.7	674		76	80	99	92	74	103	105	77	114	93	79		86.1208	78.0826	98.1983	99.1693	84.596	82.995	99.2583	72.746	101.906	95.051	84.5334		2.90455	2.63618	3.37839	3.37183	2.91496	2.88055	3.43346	2.53548
	BPAG_0000019201	1683	-	-	-	-	-		Bm9539a	Y	WBGene00229800	Bm9539	Bm9539 [Source:UniProtKB/TrEMBL;Acc:A0A5S6PXP8]	1.6e-290	83.1	520		2084	2282	2205	2031	1791	2490	2245	2155	2396	2090	1777		2361.52	2227.31	2187.14	2189.27	2047.45	2006.39	2122.24	2035.94	2141.81	2136.09	1901.47		102.645	96.9117	96.9748	95.9319	90.9225	89.7456	94.6093	91.4519
	BPAG_0000019301	201	-	-	-	-	-		-	-	-	-	-	-	-	-		21	27	30	27	28	36	37	37	33	34	29		23.7965	26.3529	29.757	29.104	32.0093	29.008	34.9767	34.9559	29.4991	34.7498	31.0313		8.66059	9.60091	11.0474	10.6784	11.902	10.8644	13.0559	13.1473
	BPAG_0000019401	3372	-	GO:0001522 - BP - pseudouridine synthesis; GO:0003676 - MF - nucleic acid binding; GO:0003723 - MF - RNA binding; GO:0009451 - BP - RNA modification; GO:0009982 - MF - pseudouridine synthase activity	03016: Transfer RNA biogenesis	K06173: tRNA pseudouridine38-40 synthase	-		Bm6217	Y	WBGene00226478	Bma-pus-1	PseudoU_synth_1 domain-containing protein [Source:UniProtKB/TrEMBL;Acc:A0A4E9EYK0]	2.2e-290	92.3	453		6323	7233	6766	6409	5629	8096	6760	6675	7390	6119	5750		7165.02	7059.64	6711.21	6908.43	6435.01	6523.57	6390.34	6306.23	6606	6253.94	6152.75		155.439	153.312	148.518	151.092	142.628	145.64	142.187	141.382
	BPAG_0000019501	1038	IPR007213: Methyltransferase Ppm1/Ppm2/Tcmp; IPR016651: Leucine carboxyl methyltransferase 1, LCMT1; IPR029063: S-adenosyl-L-methionine-dependent methyltransferase	GO:0008168 - MF - methyltransferase activity; GO:0032259 - BP - methylation	01009: Protein phosphatases and associated proteins	K18203: [phosphatase 2A protein]-leucine-carboxy methyltransferase	-		Bm1736	Y	WBGene00221997	Bma-lcmt-1	Leucine carboxyl methyltransferase 1 [Source:UniProtKB/TrEMBL;Acc:A0A4E9EYE8]	2e-248	96.8	345		1503	1517	1607	1399	1386	2060	1668	1605	1702	1477	1397		1703.15	1480.64	1593.99	1508.02	1584.46	1659.9	1576.79	1516.33	1521.44	1509.57	1494.85		120.029	104.456	114.592	107.142	114.084	120.384	113.973	110.435
	BPAG_0000019601	1074	IPR029063: S-adenosyl-L-methionine-dependent methyltransferase	-	-	-	-		Bm1950a	Y	WBGene00222211	Bm1950	Bm1950 [Source:UniProtKB/TrEMBL;Acc:A0A5S6PG03]	2.2e-205	91.7	314		255	310	281	249	233	294	269	282	403	355	297		288.958	302.57	278.724	268.404	266.363	236.898	254.29	266.42	360.246	362.829	317.803		19.6816	20.6301	19.3658	18.4303	18.5358	16.6051	17.7644	18.7532
	BPAG_0000019701	4266	-	GO:0004866 - MF - endopeptidase inhibitor activity	-	-	I39		Bm3335a	Y	WBGene00223596	Bm3335	Bm3335 [Source:UniProtKB/TrEMBL;Acc:A0A5S6PJU7]	0	97.2	1421		1381	1578	1521	1423	1333	2088	1719	1706	1652	1461	1553		1564.91	1540.18	1508.68	1533.89	1523.87	1682.46	1625	1611.75	1476.74	1493.22	1661.78		26.8347	26.4381	26.3902	26.5168	26.6974	29.6898	28.5796	28.562
	BPAG_0000019801	1473	IPR035979: RNA-binding domain superfamily	GO:0003676 - MF - nucleic acid binding	-	-	-		Bm7569	Y	WBGene00227830	Bm7569	RRM domain-containing protein [Source:UniProtKB/TrEMBL;Acc:A0A4E9EZC4]	0	95.9	490		22	29	11	12	10	16	15	32	13	7	3		24.9297	28.3049	10.9109	12.9351	11.4319	12.8924	14.1798	30.2321	11.6208	7.15437	3.21013		1.23807	1.40715	0.552744	0.647614	0.580039	0.658894	0.722255	1.55159
	BPAG_0000019901	891	IPR002890: Alpha-2-macroglobulin, N-terminal	GO:0004866 - MF - endopeptidase inhibitor activity	01002: Peptidases and inhibitors; 04080: Neuroactive ligand-receptor interaction; 04131: Membrane trafficking; 04145: Phagosome; 04147: Exosome; 04610: Complement and coagulation cascades; 05131: Shigellosis; 05133: Pertussis; 05134: Legionellosis; 05140: Leishmaniasis; 05142: Chagas disease (American trypanosomiasis); 05150: Staphylococcus aureus infection; 05152: Tuberculosis; 05167: Kaposi sar…	K03990: complement component 3	I39		Bm9538	Y	WBGene00229799	Bm9538	Bm9538, isoform b [Source:UniProtKB/TrEMBL;Acc:A0A1P6CH08]	8.6e-213	98.3	296		88	87	66	63	74	108	94	79	85	87	76		99.7188	84.9148	65.4655	67.9094	84.596	87.0239	88.8598	74.6355	75.9824	88.9186	81.3233		8.18708	6.97889	5.48278	5.62083	7.096	7.35265	7.48259	6.33256
	BPAG_0000020001	4074	IPR001680: WD40 repeat; IPR015943: WD40/YVTN repeat-like-containing domain superfamily; IPR024977: Anaphase-promoting complex subunit 4, WD40 domain	GO:0005515 - MF - protein binding	03013: RNA transport; 03019: Messenger RNA biogenesis	K14317: nuclear pore complex protein Nup214	-		Bm9537	Y	WBGene00229798	Bma-npp-14	ANAPC4_WD40 domain-containing protein [Source:UniProtKB/TrEMBL;Acc:A0A4E9EY44]	0	93.9	1334		9446	10883	10424	10222	9306	12938	11180	10904	11045	10060	9914		10703.9	10622.2	10339.6	11018.6	10638.5	10425.1	10568.6	10301.6	9873.25	10281.9	10608.4		192.199	190.929	189.386	199.458	195.165	192.639	194.636	191.159
	BPAG_0000020101	282	-	-	-	-	-		Bm1107	N	WBGene00221368	Bm1107	Bm1107 [Source:UniProtKB/TrEMBL;Acc:A0A0K0IQI6]	5.6e-25	81.1	53		6	1	4	3	2	9	4	4	5	3	3		6.79901	0.976033	3.96761	3.23378	2.28638	7.25199	3.78127	3.77901	4.46955	3.06616	3.21013		1.76371	0.253452	1.04989	0.845687	0.605955	1.93594	1.00603	1.01307
	BPAG_0000020201	2106	IPR007871: Methyltransferase TRM13; IPR008831: Mediator complex, subunit Med31; IPR021721: Zinc finger, CCCH-type, TRM13; IPR021852: Domain of unknown function DUF3456; IPR022776: TRM13/UPF0224 family, U11-48K-like CHHC zinc finger domain; IPR029063: S-adenosyl-L-methionine-dependent methyltransferase; IPR038089: Mediator complex, subunit Med31 domain superfamily	GO:0001104 - MF - RNA polymerase II transcription cofactor activity; GO:0006355 - BP - regulation of transcription, DNA-templated; GO:0008033 - BP - tRNA processing; GO:0008168 - MF - methyltransferase activity; GO:0016592 - CC - mediator complex	03016: Transfer RNA biogenesis	K15446: tRNA:m4X modification enzyme	-		Bm3776	Y	WBGene00224037	Bm3776	CHHC U11-48K-type domain-containing protein [Source:UniProtKB/TrEMBL;Acc:A0A4E9EX06]	0	83.6	731		3540	4044	4060	3868	3733	5352	4364	4317	4542	4137	3708		4011.42	3947.08	4027.12	4169.42	4267.52	4312.52	4125.36	4078.5	4060.14	4228.23	3967.72		139.338	137.245	142.693	146.004	151.447	154.154	146.97	146.404
	BPAG_0000020301	984	-	-	-	-	-		Bm4819	Y	WBGene00225080	Bma-sel-7	BMA-SEL-7 [Source:UniProtKB/TrEMBL;Acc:A0A0I9N8V9]	7.8e-227	98.5	327		369	421	410	307	348	456	373	357	386	374	371		418.139	410.91	406.68	330.923	397.83	367.434	352.603	337.277	345.05	382.248	396.986		31.0853	30.5796	30.8406	24.8017	30.2165	28.1105	26.8853	25.9121
	BPAG_0000020401	531	IPR001876: Zinc finger, RanBP2-type; IPR033774: Yaf2/RYBP C-terminal binding motif; IPR036443: Zinc finger, RanBP2-type superfamily	-	03036: Chromosome and associated proteins	K11468: YY1-associated factor 2	-		Bm9536	Y	WBGene00229797	Bm9536	RanBP2-type domain-containing protein [Source:UniProtKB/TrEMBL;Acc:A0A4E9EYJ2]	5.8e-122	100	176		737	908	856	873	814	1145	942	883	1038	868	900		835.145	886.238	849.068	941.03	930.556	922.615	890.489	834.217	927.88	887.142	963.039		115.053	122.218	119.32	130.694	130.975	130.8	125.822	118.767
	BPAG_0000020501	567	IPR000888: dTDP-4-dehydrorhamnose 3,5-epimerase-related; IPR011051: RmlC-like cupin domain superfamily; IPR014710: RmlC-like jelly roll fold	GO:0008830 - MF - dTDP-4-dehydrorhamnose 3,5-epimerase activity	00521: Streptomycin biosynthesis; 00523: Polyketide sugar unit biosynthesis	K01790: dTDP-4-dehydrorhamnose 3,5-epimerase	-		Bm2207a	Y	WBGene00222468	Bm2207	Bm2207 [Source:UniProtKB/TrEMBL;Acc:A0A0I9N4Y7]	1.8e-140	98.9	188		635	652	721	651	599	780	690	714	716	606	606		719.562	636.373	715.161	701.73	684.77	628.506	652.269	674.554	640.04	619.364	648.446		92.8357	82.1882	94.121	91.2715	90.2617	83.4468	86.3113	89.9383
	BPAG_0000020601	989	-	-	-	-	-		Bm9535a	Y	WBGene00229796	Bm9535	Bm9535 [Source:UniProtKB/TrEMBL;Acc:A0A5S6PYE1]	3e-137	94.1	220		65	43	56	31	34	39	50	34	51	54	46		73.656	41.9694	55.5465	33.4157	38.8684	31.4253	47.2659	32.1216	45.5895	55.1909	49.222		5.44805	3.10754	4.19108	2.49174	2.93726	2.39203	3.58571	2.45534
	BPAG_0000020701	1362	IPR001810: F-box domain; IPR036047: F-box-like domain superfamily	GO:0005515 - MF - protein binding	04121: Ubiquitin system	K10314: F-box protein 39	-		Bm4741a	Y	WBGene00225002	Bm4741	Bm4741, isoform d [Source:UniProtKB/TrEMBL;Acc:A0A1P6C323]	0	95.7	467		82	106	103	80	71	117	65	70	88	126	65		92.9198	103.459	102.166	86.2341	81.1664	94.2759	61.4456	66.1327	78.6642	128.779	69.5528		4.99069	5.56255	5.5975	4.66928	4.45391	5.21083	3.38484	3.67072
	BPAG_0000020801	480	-	-	-	-	-		Bm5121	Y	WBGene00225382	Bm5121	-	8.1e-89	87.4	159		917	1007	904	792	650	1007	802	861	935	760	807		1039.12	982.865	896.679	853.718	743.073	811.418	758.144	813.433	835.807	776.761	863.525		158.362	149.945	139.4	131.166	115.7	127.258	118.505	128.113
	BPAG_0000020901	2859	-	GO:0003824 - MF - catalytic activity; GO:0004559 - MF - alpha-mannosidase activity; GO:0005975 - BP - carbohydrate metabolic process; GO:0006013 - BP - mannose metabolic process; GO:0030246 - MF - carbohydrate binding	00511: Other glycan degradation; 04142: Lysosome	K12311: lysosomal alpha-mannosidase	-		Bm4424	Y	WBGene00224685	Bma-aman-1	Alpha-mann_mid domain-containing protein [Source:UniProtKB/TrEMBL;Acc:A0A4E9EWZ4]	0	92.4	956		2427	3013	2647	2338	2215	3074	2623	2566	2391	2363	2338		2750.2	2940.79	2625.56	2520.19	2532.16	2476.96	2479.57	2424.24	2137.34	2415.11	2501.76		70.3688	75.3234	68.5289	65.0081	66.1941	65.221	65.0708	64.1021
	BPAG_0000021001	594	IPR001806: Small GTPase superfamily; IPR003578: Small GTPase superfamily, Rho type; IPR005225: Small GTP-binding protein domain; IPR027417: P-loop containing nucleoside triphosphate hydrolase	GO:0003924 - MF - GTPase activity; GO:0005525 - MF - GTP binding; GO:0005622 - CC - intracellular; GO:0007264 - BP - small GTPase mediated signal transduction	04011: MAPK signaling pathway - yeast; 04014: Ras signaling pathway; 04015: Rap1 signaling pathway; 04022: cGMP-PKG signaling pathway; 04024: cAMP signaling pathway; 04031: GTP-binding proteins; 04062: Chemokine signaling pathway; 04071: Sphingolipid signaling pathway; 04072: Phospholipase D signaling pathway; 04131: Membrane trafficking; 04144: Endocytosis; 04147: Exosome; 04150: mTOR signaling …	K04513: Ras homolog gene family, member A	-		Bm9534	N	WBGene00229795	Bma-rho-1.2	Bm9534 [Source:UniProtKB/TrEMBL;Acc:A0A0K0JZL9]	1.7e-121	96	175		3315	3660	3767	3379	3040	4416	3688	3498	4005	3310	3149		3756.45	3572.28	3736.49	3642.31	3475.29	3558.31	3486.33	3304.75	3580.11	3383	3369.57		462.617	440.392	469.4	452.209	437.267	450.963	440.358	420.594
	BPAG_0000021101	3692	-	GO:0003950 - MF - NAD+ ADP-ribosyltransferase activity; GO:0005515 - MF - protein binding	03032: DNA replication proteins; 03036: Chromosome and associated proteins	K10799: tankyrase	-		Bm2732	Y	WBGene00222993	Bm2732	Poly [ADP-ribose] polymerase [Source:UniProtKB/TrEMBL;Acc:A0A4E9EYI0]	0	96.5	1222		911	1229	1218	1141	1458	1993	1694	1676	1632	1544	1664		1032.32	1199.54	1208.14	1229.91	1666.77	1605.91	1601.37	1583.41	1458.86	1578.05	1780.55		20.4541	23.7922	24.4185	24.5675	33.7408	32.7449	32.5427	32.4222
	BPAG_0000021201	330	-	-	-	-	-		-	-	-	-	-	-	-	-		28	37	14	24	38	56	33	36	59	46	31		31.7287	36.1132	13.8866	25.8702	43.4412	45.1235	31.1955	34.0111	52.7407	47.0145	33.1713		7.03345	8.01369	3.14013	5.78142	9.83851	10.2937	7.09254	7.79145
	BPAG_0000021301	1044	IPR004821: Cytidyltransferase-like domain; IPR014729: Rossmann-like alpha/beta/alpha sandwich fold	GO:0003824 - MF - catalytic activity; GO:0009058 - BP - biosynthetic process	00440: Phosphonate and phosphinate metabolism; 00564: Glycerophospholipid metabolism; 05231: Choline metabolism in cancer	K00968: choline-phosphate cytidylyltransferase	-		Bm3191	Y	WBGene00223452	Bma-pcyt-1	CTP_transf_like domain-containing protein [Source:UniProtKB/TrEMBL;Acc:A0A4E9EYB7]	2.5e-258	100	347		2425	3016	3112	2972	2887	4325	3527	3440	3907	3084	3116		2747.93	2943.71	3086.8	3203.6	3300.39	3484.99	3334.13	3249.95	3492.51	3152.01	3334.25		192.546	206.479	220.634	226.301	236.269	251.295	239.611	235.336
	BPAG_0000021401	1707	IPR005120: UPF3 domain; IPR012677: Nucleotide-binding alpha-beta plait domain superfamily; IPR035979: RNA-binding domain superfamily	GO:0003676 - MF - nucleic acid binding	03013: RNA transport; 03015: mRNA surveillance pathway; 03019: Messenger RNA biogenesis	K14328: regulator of nonsense transcripts 3	-		Bm9533	Y	WBGene00229794	Bma-smg-4	BMA-SMG-4 [Source:UniProtKB/TrEMBL;Acc:A0A1U7F4B4]	5.8e-274	92.1	471		3954	4559	4296	3989	3666	4938	4276	4236	4227	4216	4028		4480.55	4449.73	4261.21	4299.85	4190.93	3978.93	4042.18	4001.97	3778.56	4308.98	4310.13		192.012	190.889	186.279	185.767	183.493	175.475	177.667	177.236
	BPAG_0000021501	435	-	-	-	-	-		-	-	-	-	-	-	-	-		17	35	27	32	22	28	31	22	24	20	17		19.2639	34.1611	26.7813	34.4937	25.1502	22.5618	29.3048	20.7846	21.4539	20.4411	18.1907		3.23954	5.75074	4.59419	5.84788	4.32109	3.90451	5.05445	3.61213
	BPAG_0000021601	915	IPR001666: Phosphatidylinositol transfer protein; IPR023393: START-like domain superfamily	GO:0005548 - MF - phospholipid transporter activity; GO:0005622 - CC - intracellular; GO:0015914 - BP - phospholipid transport	-	-	-		Bm6815a	Y	WBGene00227076	Bm6815	Bm6815, isoform c; Bm6815, isoform d [Source:UniProtKB/TrEMBL;Acc:A0A1P6CA09]	8.4e-209	99.6	270		1428	1672	1716	1615	1533	2216	1842	1784	1968	1622	1627		1618.16	1631.93	1702.1	1740.85	1752.51	1785.6	1741.27	1685.44	1759.22	1657.77	1740.96		129.369	130.605	138.813	140.31	143.147	146.908	142.781	139.253
	BPAG_0000021701	903	-	-	-	-	-		Bm10810	Y	WBGene00231071	Bm10810	Bm10810 [Source:UniProtKB/TrEMBL;Acc:A0A0K0IPL0]	4.1e-220	98	301		1305	1422	1406	1280	1084	1508	1420	1374	1596	1260	1278		1478.78	1387.92	1394.61	1379.75	1239.22	1215.11	1342.35	1298.09	1426.68	1287.79	1367.52		119.797	112.553	115.248	112.683	102.566	101.301	111.533	108.675
	BPAG_0000021801	879	IPR033464: CSN8/PSMD8/EIF3K	-	03050: Proteasome; 03051: Proteasome; 05169: Epstein-Barr virus infection	K03031: 26S proteasome regulatory subunit N12	-		Bm7418	Y	WBGene00227679	Bma-rpn-12.2	Bm7418 [Source:UniProtKB/TrEMBL;Acc:A0A0H5SPS5]	3.4e-208	97.9	292		977	1137	1050	917	801	1184	965	1093	944	845	797		1107.11	1109.75	1041.5	988.459	915.694	954.04	912.231	1032.62	843.852	863.635	852.824		92.1361	92.452	88.4168	82.9312	77.858	81.7073	77.8646	88.8098
	BPAG_0000021901	1098	-	-	03036: Chromosome and associated proteins	K16452: coiled-coil domain-containing protein 92	-		Bm4714	Y	WBGene00224975	Bm4714	CCDC92 domain-containing protein [Source:UniProtKB/TrEMBL;Acc:A0A4E9FE02]	8.1e-216	98.1	365		1696	2299	2133	1626	1525	2279	1957	1871	1474	1702	1544		1921.85	2243.9	2115.73	1752.71	1743.36	1836.37	1849.99	1767.63	1317.62	1739.53	1652.15		128.041	149.652	143.788	117.721	118.666	125.904	126.413	121.703
	BPAG_0000022001	2742	-	GO:0007165 - BP - signal transduction	04015: Rap1 signaling pathway; 04024: cAMP signaling pathway; 04131: Membrane trafficking; 04144: Endocytosis	K12490: Arf-GAP with Rho-GAP domain, ANK repeat and PH domain-containing protein 3	-		Bm3548	Y	WBGene00223809	Bm3548	Bm3548 [Source:UniProtKB/TrEMBL;Acc:A0A0H5SA20]	0	97.4	917		2043	2244	2211	2119	2212	2965	2658	2581	2682	2518	2333		2315.06	2190.22	2193.09	2284.13	2528.73	2389.13	2512.65	2438.41	2397.47	2573.53	2496.41		61.7625	58.4925	59.6837	61.4329	68.9251	65.5927	68.7526	67.228
	BPAG_0000022101	2319	-	GO:0003676 - MF - nucleic acid binding; GO:0003677 - MF - DNA binding; GO:0004003 - MF - ATP-dependent DNA helicase activity; GO:0005524 - MF - ATP binding; GO:0005634 - CC - nucleus; GO:0006139 - BP - nucleobase-containing compound metabolic process; GO:0006289 - BP - nucleotide-excision repair; GO:0008026 - MF - ATP-dependent helicase activity; GO:0016818 - MF - hydrolase activity, acting on ac…	03021: Transcription machinery; 03022: Basal transcription factors; 03400: DNA repair and recombination proteins; 03420: Nucleotide excision repair	K10844: DNA excision repair protein ERCC-2	-		Bm7712	Y	WBGene00227973	Bma-xpd-1	Helicase ATP-binding domain-containing protein [Source:UniProtKB/TrEMBL;Acc:A0A4E9F6H5]	0	98.6	767		932	1070	1061	986	973	1363	1256	1177	1467	1329	1179		1056.11	1044.35	1052.41	1062.84	1112.32	1098.27	1187.32	1111.97	1311.37	1358.31	1261.58		33.315	32.9783	33.8648	33.7998	35.8486	35.6528	38.4141	36.2498
	BPAG_0000022201	2073	IPR000048: IQ motif, EF-hand binding site; IPR003124: WH2 domain; IPR026140: 28S ribosomal protein S26	GO:0003779 - MF - actin binding; GO:0005515 - MF - protein binding; GO:0005763 - CC - mitochondrial small ribosomal subunit	-	-	-		Bm7711a	Y	WBGene00227972	Bma-wip-1	WH2 domain-containing protein [Source:UniProtKB/TrEMBL;Acc:A0A4E9F4Q6]	1.5e-231	96.1	363		2914	3367	3284	2971	2738	3849	3378	3208	3658	3108	2866		3302.05	3286.3	3257.41	3202.52	3130.05	3101.44	3193.28	3030.77	3269.93	3176.54	3066.74		116.524	116.088	117.257	113.931	112.848	112.628	115.575	110.526
	BPAG_0000022301	1012	IPR019404: Mediator complex, subunit Med11	GO:0001104 - MF - RNA polymerase II transcription cofactor activity; GO:0006357 - BP - regulation of transcription from RNA polymerase II promoter; GO:0016592 - CC - mediator complex	-	-	-		Bm5424	Y	WBGene00225685	Bma-mdt-11	Mediator of RNA polymerase II transcription subunit 11 [Source:UniProtKB/TrEMBL;Acc:A0A4E9F6Y0]	8.7e-76	97.6	125		846	913	880	875	703	981	857	894	924	721	744		958.661	891.118	872.873	943.186	803.662	790.467	810.137	844.609	825.974	736.9	796.112		69.2969	64.4815	64.363	68.733	59.3519	58.8012	60.0623	63.0938
	BPAG_0000022401	714	-	-	-	-	-		-	-	-	-	-	-	-	-		1	1	0	0	0	4	2	2	3	3	0		1.13317	0.976033	0	0	0	3.22311	1.89063	1.88951	2.68173	3.06616	0		0.116098	0.100103	0	0	0	0.339829	0.198671	0.200061
	BPAG_0000022501	2499	IPR000731: Sterol-sensing domain; IPR003392: Protein patched/dispatched	GO:0016021 - CC - integral component of membrane	-	-	-		Bm10811a	Y	WBGene00231072	Bma-ptr-9	-	0	83.8	888		183	213	211	187	169	237	231	264	221	235	204		207.37	207.895	209.291	201.572	193.199	190.969	218.368	249.415	197.554	240.183	218.289		6.07028	6.09198	6.24957	5.94857	5.77804	5.75281	6.55613	7.54514
	BPAG_0000022601	7520	IPR000742: EGF-like domain; IPR011042: Six-bladed beta-propeller, TolB-like; IPR013032: EGF-like, conserved site; IPR028916: Tox-GHH domain	-	-	-	-		Bm5381a	Y	WBGene00225642	Bm5381	BMA-TEN-1 [Source:UniProtKB/TrEMBL;Acc:A0A5S6PPZ8]	0	98.3	2454		2903	3442	3336	3026	3050	4427	3822	3495	3975	3395	3356		3289.59	3359.5	3308.98	3261.81	3486.73	3567.18	3613	3301.91	3553.3	3469.87	3591.07		32.0003	32.7143	32.8354	31.9881	34.6531	35.71	36.0475	33.194
	BPAG_0000022701	1086	-	-	-	-	-		Bm5381a	N	WBGene00225642	Bm5381	BMA-TEN-1 [Source:UniProtKB/TrEMBL;Acc:A0A5S6PPZ8]	3.8e-117	63.4	339		81	78	98	69	81	86	80	64	95	76	52		91.7867	76.1305	97.2064	74.3769	92.5983	69.2968	75.6254	60.4642	84.9215	77.6761	55.6422		6.18272	5.13345	6.67929	5.05076	6.37258	4.8036	5.22471	4.20901
	BPAG_0000022801	252	-	-	-	-	-		Bm5381a	N	WBGene00225642	Bm5381	BMA-TEN-1 [Source:UniProtKB/TrEMBL;Acc:A0A5S6PPZ8]	8.1e-33	94.6	56		22	24	22	16	21	32	32	17	14	19	11		24.9297	23.4248	21.8218	17.2468	24.007	25.7849	30.2501	16.0608	12.5148	19.419	11.7705		7.2368	6.807	6.46184	5.04727	7.11998	7.70278	9.0064	4.81813
	BPAG_0000022901	327	-	-	-	-	-		-	-	-	-	-	-	-	-		2	2	1	3	1	0	0	0	3	0	0		2.26634	1.95207	0.991902	3.23378	1.14319	0	0	0	2.68173	0	0		0.506998	0.437147	0.226353	0.729308	0.261284	0	0	0
	BPAG_0000023001	4584	IPR002048: EF-hand domain; IPR010255: Haem peroxidase; IPR011992: EF-hand domain pair; IPR013112: FAD-binding 8; IPR013121: Ferric reductase, NAD binding domain; IPR013130: Ferric reductase transmembrane component-like domain; IPR017927: Ferredoxin reductase-type FAD-binding domain; IPR017938: Riboflavin synthase-like beta-barrel; IPR019791: Haem peroxidase, animal type; IPR034821: Dual oxidase, …	GO:0004601 - MF - peroxidase activity; GO:0005509 - MF - calcium ion binding; GO:0006979 - BP - response to oxidative stress; GO:0016491 - MF - oxidoreductase activity; GO:0020037 - MF - heme binding; GO:0055114 - BP - oxidation-reduction process	04013: MAPK signaling pathway - fly; 04131: Membrane trafficking; 04624: Toll and Imd signaling pathway	K13411: dual oxidase	-		Bm4466	Y	WBGene00224727	Bm4466	Bm4466 [Source:UniProtKB/TrEMBL;Acc:A0A0K0JES4]	0	96.6	1523		1790	2145	2080	1949	2034	2586	2283	2206	2399	2155	2146		2028.37	2093.59	2063.16	2100.88	2325.25	2083.74	2158.16	2084.13	2144.49	2202.53	2296.31		32.3693	33.4447	33.5856	33.7991	37.9111	34.2202	35.3234	34.3709
	BPAG_0000023101	498	-	-	-	-	-		Bm2195a	Y	WBGene00222456	Bm2195	SHSP domain-containing protein [Source:UniProtKB/TrEMBL;Acc:A0A4E9F4P6]	6.2e-102	90.3	165		354	339	297	293	216	340	234	298	337	267	240		401.142	330.875	294.595	315.833	246.929	273.964	221.204	281.536	301.248	272.888	256.81		58.9248	48.6536	44.1429	46.7709	37.0582	41.414	33.3264	42.7382
	BPAG_0000023201	1839	-	GO:0005783 - CC - endoplasmic reticulum; GO:0016853 - MF - isomerase activity; GO:0045454 - BP - cell redox homeostasis	03110: Chaperones and folding catalysts; 04131: Membrane trafficking; 04141: Protein processing in endoplasmic reticulum; 04918: Thyroid hormone synthesis; 05110: Vibrio cholerae infection	K09582: protein disulfide-isomerase A4	-		Bm2197	Y	WBGene00222458	Bm2197	-	0	97.7	612		1237	1362	1252	1254	1439	1798	1584	1483	1572	1185	1222		1401.73	1329.36	1241.86	1351.72	1645.05	1448.79	1497.38	1401.07	1405.23	1211.13	1307.59		55.7586	52.9347	50.3914	54.2067	66.8558	59.307	61.0907	57.5956
	BPAG_0000023301	828	IPR001254: Serine proteases, trypsin domain; IPR001314: Peptidase S1A, chymotrypsin family; IPR009003: Peptidase S1, PA clan; IPR018114: Serine proteases, trypsin family, histidine active site	GO:0004252 - MF - serine-type endopeptidase activity; GO:0006508 - BP - proteolysis	-	-	S01A		Bm10813	Y	WBGene00231074	Bm10813	Bm10813 [Source:UniProtKB/TrEMBL;Acc:A0A0J9Y0M3]	8.6e-208	100	275		3872	4621	3853	3738	2952	4712	3337	4108	4031	3441	3473		4387.63	4510.25	3821.8	4029.29	3374.69	3796.82	3154.52	3881.05	3603.35	3516.89	3716.26		387.641	398.888	344.432	358.878	304.611	345.202	285.843	354.348
	BPAG_0000023401	1626	IPR001313: Pumilio RNA-binding repeat; IPR011989: Armadillo-like helical; IPR016024: Armadillo-type fold; IPR033133: Pumilio homology domain	GO:0003723 - MF - RNA binding; GO:0005488 - MF - binding	05017: Spinocerebellar ataxia	K17943: pumilio RNA-binding family	-		Bm4352a	Y	WBGene00224613	Bm4352	PUM-HD domain-containing protein [Source:UniProtKB/TrEMBL;Acc:A0A4E9F4L2]	0	91.4	513		1714	2101	1811	1800	1540	2267	1815	2037	1926	1791	1734		1942.25	2050.64	1796.33	1940.27	1760.51	1826.7	1715.75	1924.46	1721.67	1830.5	1855.45		87.3805	92.3529	82.4389	88.0014	80.9208	84.5725	79.1695	89.4747
	BPAG_0000023501	1776	-	-	-	-	-		Bm10815a	Y	WBGene00231076	Bm10815	Bm10815, isoform a [Source:UniProtKB/TrEMBL;Acc:A0A0K0IPL5]	0	84	617		171	211	174	193	180	285	207	244	190	198	233		193.772	205.943	172.591	208.04	205.774	229.646	195.681	230.52	169.843	202.367	249.32		7.98137	8.4915	7.25171	8.63877	8.65943	9.73419	8.26664	9.81243
	BPAG_0000023601	1257	IPR036034: PDZ superfamily	GO:0005515 - MF - protein binding	-	-	-		Bm10816a	Y	WBGene00231077	Bm10816	-	1.6e-290	97.9	420		211	228	236	210	158	277	205	227	211	158	170		239.099	222.535	234.089	226.365	180.624	223.2	193.79	214.459	188.615	161.484	181.907		13.9146	12.9642	13.8967	13.2807	10.7394	13.3673	11.567	12.8979
	BPAG_0000023701	549	-	-	00190: Oxidative phosphorylation; 04714: Thermogenesis; 04723: Retrograde endocannabinoid signaling; 04932: Non-alcoholic fatty liver disease (NAFLD); 05010: Alzheimer disease; 05012: Parkinson disease; 05016: Huntington disease	K03952: NADH dehydrogenase (ubiquinone) 1 alpha subcomplex subunit 8	-		Bm6811	Y	WBGene00227072	Bm6811	Bm6811 [Source:UniProtKB/TrEMBL;Acc:A0A0J9Y0U2]	1.7e-135	99.5	182		1847	1942	1803	1743	1468	2055	1750	1733	1810	1563	1445		2092.96	1895.46	1788.4	1878.83	1678.2	1655.87	1654.3	1637.26	1617.98	1597.47	1546.21		278.881	252.826	243.085	252.384	228.462	227.058	226.083	225.453
	BPAG_0000023801	3922	IPR001356: Homeobox domain; IPR003350: CUT domain; IPR009057: Homeobox-like domain superfamily; IPR010982: Lambda repressor-like, DNA-binding domain superfamily; IPR017970: Homeobox, conserved site	GO:0003677 - MF - DNA binding; GO:0006355 - BP - regulation of transcription, DNA-templated; GO:0043565 - MF - sequence-specific DNA binding	03000: Transcription factors	K09313: homeobox protein cut-like	-		Bm6810a	Y	WBGene00227071	Bma-ceh-44	Homeobox protein cut-like [Source:UniProtKB/TrEMBL;Acc:A0A4E9FDW5]	0	92.9	1303		3250	3842	3812	3575	3664	5109	4397	4036	4253	3747	3818		3682.8	3749.92	3781.13	3853.59	4188.64	4116.72	4156.56	3813.02	3801.8	3829.63	4085.43		68.691	70.0156	71.9415	72.4613	79.8193	79.0181	79.5153	73.4976
	BPAG_0000023901	762	IPR001347: Sugar isomerase (SIS); IPR035466: GlmS/AgaS, SIS domain 1; IPR035490: GlmS/FrlB, SIS domain 2	GO:0097367 - MF - carbohydrate derivative binding; GO:1901135 - BP - carbohydrate derivative metabolic process	00250: Alanine, aspartate and glutamate metabolism; 00520: Amino sugar and nucleotide sugar metabolism; 01002: Peptidases and inhibitors; 04931: Insulin resistance	K00820: glucosamine--fructose-6-phosphate aminotransferase (isomerizing)	-		Bm13825a	N	WBGene00234086	Bm13825	Bm13825, isoform f [Source:UniProtKB/TrEMBL;Acc:A0A158PUC7]	3.8e-45	37.6	255		18	26	23	23	18	19	18	18	21	17	23		20.397	25.3768	22.8137	24.7923	20.5774	15.3098	17.0157	17.0056	18.7721	17.3749	24.611		1.95813	2.43873	2.23412	2.39944	2.01826	1.5125	1.6754	1.68713
	BPAG_0000024001	3171	-	-	03110: Chaperones and folding catalysts; 04141: Protein processing in endoplasmic reticulum	K09486: hypoxia up-regulated 1	-		Bm5992	Y	WBGene00226253	Bm5992	Bm5992 [Source:UniProtKB/TrEMBL;Acc:A0A0H5SB56]	0	94.7	1031		4137	4858	4668	4312	4226	6041	4888	4935	4826	4286	4263		4687.92	4741.57	4630.2	4648.02	4831.12	4867.7	4620.71	4662.36	4314.01	4380.52	4561.59		108.147	109.498	108.96	108.099	113.866	115.561	109.329	111.153
	BPAG_0000024101	834	IPR005324: Ribosomal protein S5, C-terminal; IPR005711: Ribosomal protein S5, eukaryotic/archaeal; IPR013810: Ribosomal protein S5, N-terminal; IPR014721: Ribosomal protein S5 domain 2-type fold, subgroup; IPR018192: Ribosomal protein S5, N-terminal, conserved site; IPR020568: Ribosomal protein S5 domain 2-type fold	GO:0003723 - MF - RNA binding; GO:0003735 - MF - structural constituent of ribosome; GO:0005840 - CC - ribosome; GO:0006412 - BP - translation; GO:0015935 - CC - small ribosomal subunit	03010: Ribosome; 03011: Ribosome	K02981: small subunit ribosomal protein S2e	-		Bm2853a	Y	WBGene00223114	Bma-rps-2.1	S5 DRBM domain-containing protein [Source:UniProtKB/TrEMBL;Acc:A0A4E9ER26]	2.1e-170	94.6	277		9628	11020	10162	9550	7697	10646	9595	9677	11369	8408	8016		10910.1	10755.9	10079.7	10294.2	8799.12	8578.3	9070.32	9142.38	10162.9	8593.42	8577.47		956.961	944.41	901.877	910.28	788.525	774.316	815.982	828.714
	BPAG_0000024201	1287	IPR019378: GDP-fucose protein O-fucosyltransferase	-	00514: Other types of O-glycan biosynthesis; 01003: Glycosyltransferases	K03691: peptide-O-fucosyltransferase	-		Bm4993	Y	WBGene00225254	Bma-pad-2	-	4.8e-288	92.5	416		1283	1398	1458	1148	1070	1461	1298	1280	1214	1058	1012		1453.86	1364.49	1446.19	1237.46	1223.21	1177.24	1227.02	1209.28	1085.21	1081.33	1082.88		82.6366	77.6378	83.852	70.9089	71.0338	68.8604	71.5316	71.0332
	BPAG_0000024301	1344	-	GO:0005086 - MF - ARF guanyl-nucleotide exchange factor activity; GO:0032012 - BP - regulation of ARF protein signal transduction	04072: Phospholipase D signaling pathway; 04131: Membrane trafficking; 04144: Endocytosis; 05130: Pathogenic Escherichia coli infection; 05132: Salmonella infection	K18441: cytohesin	-		Bm4843	Y	WBGene00225104	Bma-grp-1	Bm4843 [Source:UniProtKB/TrEMBL;Acc:A0A0K0JGE9]	2.9e-288	88.1	447		1181	1386	1392	1253	1338	1798	1684	1586	1680	1529	1339		1338.27	1352.78	1380.73	1350.64	1529.59	1448.79	1591.91	1498.38	1501.77	1562.72	1432.79		72.8408	73.707	76.6609	74.1121	85.0583	81.15	88.8678	84.2818
	BPAG_0000024401	321	-	-	-	-	-		-	-	-	-	-	-	-	-		0	0	0	0	0	0	3	1	0	0	0		0	0	0	0	0	0	2.83595	0.944753	0	0	0		0	0	0	0	0	0	0.662854	0.222497
	BPAG_0000024501	408	-	-	-	-	-		-	-	-	-	-	-	-	-		9	13	21	12	5	14	17	17	11	10	14		10.1985	12.6884	20.8299	12.9351	5.71594	11.2809	16.0704	16.0608	9.83302	10.2205	14.9806		1.82855	2.27734	3.80972	2.33808	1.04706	2.08145	2.95522	2.9759
	BPAG_0000024601	324	-	GO:0016021 - CC - integral component of membrane; GO:0016192 - BP - vesicle-mediated transport	04130: SNARE interactions in vesicular transport; 04131: Membrane trafficking; 04147: Exosome	K08515: vesicle-associated membrane protein 7	-		Bm7013	Y	WBGene00227274	Bm7013	V-SNARE coiled-coil homology domain-containing protein [Source:UniProtKB/TrEMBL;Acc:A0A4E9ES49]	1e-66	100	107		111	136	133	144	107	161	135	141	152	106	121		125.782	132.74	131.923	155.221	122.321	129.73	127.618	133.21	135.874	108.338	129.475		28.3989	30.0012	30.3837	35.3309	28.2162	30.1425	29.5522	31.0816
	BPAG_0000024701	7029	IPR031334: Piezo non-specific cation channel, R-Ras-binding domain; IPR031805: Piezo domain	-	04040: Ion channels; 04131: Membrane trafficking	K22128: -	-		Bm2127a	Y	WBGene00222388	Bma-pezo-1	Piezo-type mechanosensitive ion channel component [Source:UniProtKB/TrEMBL;Acc:A0A4E9ER64]	0	96.5	2349		3578	4258	4292	3830	3833	5630	4862	4874	4324	3744	4001		4054.48	4155.95	4257.24	4128.46	4381.84	4536.53	4596.13	4604.73	3865.27	3826.57	4281.24		42.196	43.2969	45.196	43.3154	46.5913	48.5862	49.0595	49.5247
	BPAG_0000024801	1557	IPR010796: B9 domain	-	03036: Chromosome and associated proteins	K19332: -	-		Bm10994a	Y	WBGene00231255	Bma-mks-1	-	0	94.4	522		254	287	278	233	222	282	246	260	306	273	220		287.825	280.121	275.749	251.157	253.788	227.229	232.548	245.636	273.537	279.021	235.41		13.5229	13.1746	13.2157	11.8961	12.1822	10.9865	11.2059	11.9265
	BPAG_0000024901	384	-	-	-	-	-		-	-	-	-	-	-	-	-		109	100	83	77	97	128	108	110	98	98	103		123.515	97.6033	82.3278	83.0004	110.889	103.139	102.094	103.923	87.6033	100.161	110.214		23.5299	18.6129	15.9986	15.9403	21.5824	20.2198	19.9478	20.4593
	BPAG_0000025001	582	-	GO:0003700 - MF - transcription factor activity, sequence-specific DNA binding; GO:0006355 - BP - regulation of transcription, DNA-templated	-	-	-		Bm6728	Y	WBGene00226989	Bm6728	BZIP domain-containing protein [Source:UniProtKB/TrEMBL;Acc:A0A4E9ERM1]	2.8e-110	94.3	193		327	436	370	285	265	381	292	324	305	302	215		370.546	425.55	367.004	307.209	302.945	307.001	276.033	306.1	272.643	308.66	230.059		46.5746	53.5437	47.0558	38.9278	38.903	39.71	35.5846	39.7605
	BPAG_0000025101	1872	IPR000306: FYVE zinc finger; IPR011011: Zinc finger, FYVE/PHD-type; IPR013083: Zinc finger, RING/FYVE/PHD-type; IPR013087: Zinc finger C2H2-type; IPR017455: Zinc finger, FYVE-related; IPR021565: Rabenosyn, Rab binding domain; IPR036531: Rabenosyn, Rab binding domain superfamily	GO:0003676 - MF - nucleic acid binding; GO:0046872 - MF - metal ion binding	04131: Membrane trafficking; 04144: Endocytosis	K12481: rabenosyn-5	-		Bm6531	Y	WBGene00226792	Bma-rabs-5	FYVE-type domain-containing protein [Source:UniProtKB/TrEMBL;Acc:A0A4E9ER16]	0	91.5	623		2255	3030	2874	2691	2526	3623	3247	3125	3102	2820	2843		2555.3	2957.38	2850.73	2900.7	2887.69	2919.33	3069.44	2952.35	2772.91	2882.19	3042.13		99.8539	115.686	113.636	114.273	115.289	117.398	123.021	119.227
	BPAG_0000025201	474	-	-	-	-	-		Bm10993	Y	WBGene00231254	Bm10993	Bm10993 [Source:UniProtKB/TrEMBL;Acc:A0A0K0IQ85]	7.2e-71	75.7	152		9	18	22	15	20	13	18	16	16	11	13		10.1985	17.5686	21.8218	16.1689	22.8638	10.4751	17.0157	15.1161	14.3026	11.2426	13.9106		1.57394	2.71418	3.43541	2.51565	3.60505	1.66365	2.69337	2.41086
	BPAG_0000025301	1323	IPR003656: Zinc finger, BED-type; IPR036236: Zinc finger C2H2 superfamily	GO:0003677 - MF - DNA binding	-	-	-		Bm3595	Y	WBGene00223856	Bma-bed-3	BMA-BED-3 [Source:UniProtKB/TrEMBL;Acc:A0A0H5SQJ8]	9.6e-317	98.6	440		697	854	813	787	816	1032	923	932	1016	837	828		789.818	833.532	806.416	848.328	932.842	831.562	872.528	880.51	908.214	855.459	885.996		43.6714	46.1363	45.4847	47.2882	52.6975	47.3171	49.4816	50.3136
	BPAG_0000025401	558	IPR005225: Small GTP-binding protein domain; IPR006689: Small GTPase superfamily, ARF/SAR type; IPR024156: Small GTPase superfamily, ARF type; IPR027417: P-loop containing nucleoside triphosphate hydrolase	GO:0005525 - MF - GTP binding; GO:0005622 - CC - intracellular	04031: GTP-binding proteins; 04131: Membrane trafficking	K07955: ADP-ribosylation factor-like protein 8	-		Bm6909	Y	WBGene00227170	Bma-arl-8	BMA-ARL-8 [Source:UniProtKB/TrEMBL;Acc:A0A0J9Y3H3]	2.5e-134	99.5	185		998	1216	1134	1135	1004	1457	1192	1162	1417	1261	1103		1130.9	1186.86	1124.82	1223.45	1147.76	1174.02	1126.82	1097.8	1266.67	1288.81	1180.26		148.259	155.756	150.423	161.696	153.73	158.388	151.511	148.731
	BPAG_0000025501	20421	-	GO:0004672 - MF - protein kinase activity; GO:0005515 - MF - protein binding; GO:0005524 - MF - ATP binding; GO:0006468 - BP - protein phosphorylation	-	-	-		Bm7502	Y	WBGene00227763	Bma-unc-22	BMA-UNC-22 [Source:UniProtKB/TrEMBL;Acc:A0A0K0JSP5]	0	98.3	6806		3026	3192	2796	2842	2400	3431	2853	3335	3080	2702	2757		3428.97	3115.5	2773.36	3063.47	2743.65	2764.62	2696.99	3150.75	2753.25	2761.59	2950.11		12.2833	11.172	10.1343	11.0633	10.0414	10.1916	9.90892	11.664
	BPAG_0000025601	4509	IPR001194: cDENN domain; IPR005112: dDENN domain; IPR005113: uDENN domain; IPR011990: Tetratricopeptide-like helical domain superfamily; IPR023341: MABP domain; IPR037516: Tripartite DENN domain	GO:0005515 - MF - protein binding	04131: Membrane trafficking	K20163: -	-		Bm4253a	Y	WBGene00224514	Bma-denn-4	BMA-DENN-4 [Source:UniProtKB/TrEMBL;Acc:A0A0H5SBD7]	0	98.5	1493		2517	2836	2680	2402	2342	3267	2963	2828	3230	2722	2634		2852.19	2768.03	2658.3	2589.18	2677.35	2632.47	2800.97	2671.76	2887.33	2782.03	2818.49		46.273	44.9543	43.9935	42.3477	44.3779	43.9508	46.6072	44.7949
	BPAG_0000025701	498	-	-	-	-	-		Bm10992	Y	WBGene00231253	Bm10992	Bm10992 [Source:UniProtKB/TrEMBL;Acc:A0A0J9Y3B8]	1.4e-90	97.8	137		1058	1190	1465	1327	1221	1639	1414	1430	1598	1395	1342		1198.89	1161.48	1453.14	1430.41	1395.83	1320.67	1336.68	1351	1428.47	1425.76	1436		176.109	170.79	217.742	211.826	209.482	199.64	201.383	205.086
	BPAG_0000025801	195	-	-	-	-	-		-	-	-	-	-	-	-	-		26	16	19	15	24	30	23	24	38	35	23		29.4624	15.6165	18.8461	16.1689	27.4365	24.1733	21.7423	22.6741	33.9686	35.7719	24.611		11.0526	5.86449	7.21196	6.11497	10.5157	9.33221	8.36556	8.79035
	BPAG_0000025901	921	IPR002189: F-actin-capping protein subunit alpha; IPR017865: F-actin capping protein, alpha subunit, conserved site; IPR037282: F-actin-capping protein subunit alpha/beta	GO:0008290 - CC - F-actin capping protein complex; GO:0051016 - BP - barbed-end actin filament capping	04131: Membrane trafficking; 04144: Endocytosis; 04147: Exosome; 04812: Cytoskeleton proteins	K10364: capping protein (actin filament) muscle Z-line, alpha	-		Bm3041a	Y	WBGene00223302	Bma-cap-1	F-actin-capping protein subunit alpha [Source:UniProtKB/TrEMBL;Acc:A0A5S6PJ11]	2.3e-210	93.7	303		2326	2465	2398	2269	1955	2910	2441	2245	2464	2143	2037		2635.75	2405.92	2378.58	2445.82	2234.93	2344.81	2307.52	2120.97	2202.6	2190.26	2179.68		209.351	191.294	192.719	195.845	181.362	191.66	187.979	174.095
	BPAG_0000026001	312	-	-	-	-	-		-	-	-	-	-	-	-	-		34	41	44	38	38	44	39	37	37	27	13		38.5277	40.0173	43.6437	40.9612	43.4412	35.4542	36.8674	34.9559	33.0747	27.5954	13.9106		9.03334	9.39235	10.4384	9.68203	10.4061	8.55453	8.86567	8.46987
	BPAG_0000026101	561	IPR001806: Small GTPase superfamily; IPR005225: Small GTP-binding protein domain; IPR020849: Small GTPase superfamily, Ras type; IPR027417: P-loop containing nucleoside triphosphate hydrolase	GO:0003924 - MF - GTPase activity; GO:0005525 - MF - GTP binding; GO:0007165 - BP - signal transduction; GO:0016020 - CC - membrane	04010: MAPK signaling pathway; 04014: Ras signaling pathway; 04015: Rap1 signaling pathway; 04024: cAMP signaling pathway; 04031: GTP-binding proteins; 04062: Chemokine signaling pathway; 04510: Focal adhesion; 04530: Tight junction; 04611: Platelet activation; 04670: Leukocyte transendothelial migration; 04720: Long-term potentiation; 04722: Neurotrophin signaling pathway; 04934: Cushing syndrom…	K04353: Ras-related protein Rap-1A	-		Bm2428	Y	WBGene00222689	Bma-rap-1	BMA-RAP-1 [Source:UniProtKB/TrEMBL;Acc:A0A0K0J5Y2]	6.4e-133	99.5	186		969	1114	1161	1120	1030	1533	1183	1168	1404	1076	1054		1098.04	1087.3	1151.6	1207.28	1177.48	1235.26	1118.31	1103.47	1255.05	1099.73	1127.83		143.181	141.928	153.181	158.706	156.868	165.759	149.563	148.7
	BPAG_0000026201	747	-	GO:0046983 - MF - protein dimerization activity	-	-	-		Bm699a	Y	WBGene00220960	Bma-lin-22.1	BMA-LIN-22, isoform a; BMA-LIN-22, isoform b [Source:UniProtKB/TrEMBL;Acc:A0A0J9Y352]	1.5e-180	96.8	248		470	535	463	386	426	516	478	447	468	427	366		532.589	522.177	459.25	416.08	486.998	415.781	451.862	422.305	418.35	436.417	391.636		52.1557	51.1892	45.877	41.0775	48.7247	41.9013	45.3847	42.7382
	BPAG_0000026301	161	-	-	-	-	-		-	-	-	-	-	-	-	-		0	0	0	0	2	0	0	0	0	1	0		0	0	0	0	2.28638	0	0	0	0	1.02205	0		0	0	0	0	1.06136	0	0	0
	BPAG_0000026401	1111	-	-	03110: Chaperones and folding catalysts	K09569: FK506-binding protein 2	-		Bm7733a	Y	WBGene00227994	Bma-hmg-5	HMG box domain-containing protein [Source:UniProtKB/TrEMBL;Acc:A0A4E9ET64]	1e-141	98.6	210		4573	5335	5258	4600	3951	5662	5140	4904	5190	4270	4117		5181.98	5207.13	5215.42	4958.46	4516.74	4562.31	4858.93	4633.07	4639.4	4364.17	4405.37		341.202	343.214	350.3	329.14	303.845	309.139	328.134	315.258
	BPAG_0000026501	1137	-	GO:0004756 - MF - selenide, water dikinase activity; GO:0005524 - MF - ATP binding; GO:0016260 - BP - selenocysteine biosynthetic process	00450: Selenocompound metabolism; 03016: Transfer RNA biogenesis	K01008: selenide, water dikinase	-		Bm6562a	Y	WBGene00226823	Bma-seld-1	BMA-SELD-1, isoform a; BMA-SELD-1, isoform b; BMA-SELD-1, isoform c [Source:UniProtKB/TrEMBL;Acc:A0A0J9XLV4]	1.6e-242	89.1	395		2647	2846	2628	2398	2041	2780	2492	2500	2578	2114	2006		2999.5	2777.79	2606.72	2584.87	2333.25	2240.06	2355.73	2361.88	2304.5	2160.62	2146.51		192.982	178.904	171.08	167.659	153.371	148.314	155.45	157.04
	BPAG_0000026601	618	-	-	03036: Chromosome and associated proteins; 04110: Cell cycle; 04111: Cell cycle - yeast; 04113: Meiosis - yeast; 04114: Oocyte meiosis; 04914: Progesterone-mediated oocyte maturation; 05166: Human T-cell leukemia virus 1 infection	K02537: mitotic spindle assembly checkpoint protein MAD2	-		Bm14041	Y	WBGene00234302	Bma-mdf-2	BMA-MDF-2 [Source:UniProtKB/TrEMBL;Acc:A0A0K0J022]	2.6e-146	100	205		760	940	1044	839	792	1278	1044	1109	1182	990	935		861.208	917.471	1035.55	904.38	905.406	1029.78	986.911	1047.73	1056.6	1011.83	1000.49		101.941	108.714	125.039	107.922	109.496	125.441	119.816	128.166
	BPAG_0000026701	1119	-	GO:0008495 - MF - protoheme IX farnesyltransferase activity; GO:0016021 - CC - integral component of membrane; GO:0016765 - MF - transferase activity, transferring alkyl or aryl (other than methyl) groups; GO:0048034 - BP - heme O biosynthetic process	00190: Oxidative phosphorylation; 00860: Porphyrin and chlorophyll metabolism; 01006: Prenyltransferases; 03029: Mitochondrial biogenesis; 04714: Thermogenesis	K02257: protoheme IX farnesyltransferase	-		Bm6580	Y	WBGene00226841	Bma-cox-10	-	5.1e-268	99.7	361		2358	2835	2665	2272	1987	2854	2581	2487	2743	2226	2158		2672.01	2767.05	2643.42	2449.05	2271.52	2299.69	2439.86	2349.6	2452	2275.09	2309.15		174.678	181.079	176.279	161.405	151.715	154.711	163.591	158.736
	BPAG_0000026801	1590	IPR006759: Glycosyl transferase family 54	GO:0005975 - BP - carbohydrate metabolic process; GO:0016020 - CC - membrane; GO:0016758 - MF - transferase activity, transferring hexosyl groups	00510: N-Glycan biosynthesis; 00513: Various types of N-glycan biosynthesis; 01003: Glycosyltransferases	K00738: alpha-1,3-mannosylglycoprotein beta-1,4-N-acetylglucosaminyltransferase A/B	-		Bm13328	Y	WBGene00233589	Bm13328	Bm13328 [Source:UniProtKB/TrEMBL;Acc:A0A0K0IXH6]	0	99.4	529		1797	2172	2023	1817	1807	2440	2090	2076	2275	1871	1806		2036.3	2119.94	2006.62	1958.59	2065.74	1966.1	1975.71	1961.31	2033.65	1912.26	1932.5		93.6861	97.6355	94.1744	90.8438	97.1004	93.0874	93.229	93.2524
	BPAG_0000026901	1641	IPR013120: Male sterility, NAD-binding; IPR033640: Fatty acyl-CoA reductase, C-terminal; IPR036291: NAD(P)-binding domain superfamily	-	00073: Cutin, suberine and wax biosynthesis; 04146: Peroxisome; 04212: Longevity regulating pathway - worm	K13356: fatty acyl-CoA reductase	-		Bm7090	Y	WBGene00227351	Bma-fard-1	Fatty acyl-CoA reductase [Source:UniProtKB/TrEMBL;Acc:A0A4E9ETQ0]	0	96.2	546		2948	3216	3197	2868	2634	3538	3229	3278	3779	3211	2951		3340.58	3138.92	3171.11	3091.49	3011.16	2850.84	3052.43	3096.9	3378.09	3281.81	3157.7		148.917	140.072	144.201	138.934	137.141	130.782	139.56	142.669
	BPAG_0000027001	900	-	-	00330: Arginine and proline metabolism; 00340: Histidine metabolism; 00410: beta-Alanine metabolism; 01002: Peptidases and inhibitors; 04147: Exosome	K08660: cytosolic nonspecific dipeptidase	M20F		Bm7073	Y	WBGene00227334	Bm7073	BMA-PES-9 [Source:UniProtKB/TrEMBL;Acc:A0A0K0JQT9]	2.9e-75	51.6	289		2187	2640	2596	2166	2119	2814	2467	2502	2401	2424	1986		2478.24	2576.73	2574.98	2334.79	2422.42	2267.46	2332.1	2363.77	2146.28	2477.46	2125.11		201.433	209.656	213.499	191.317	201.163	189.662	194.414	198.552
	BPAG_0000027101	2244	-	GO:0003676 - MF - nucleic acid binding; GO:0005524 - MF - ATP binding	03013: RNA transport; 03041: Spliceosome	K13131: ATP-dependent RNA helicase DDX20	-		Bm5608a	Y	WBGene00225869	Bma-mel-46	BMA-MEL-46, isoform a [Source:UniProtKB/TrEMBL;Acc:A0A0K0JJK5]	0	91.6	759		2252	2929	2933	2749	2956	4323	3599	3453	3461	3402	3336		2551.9	2858.8	2909.25	2963.22	3379.27	3483.37	3402.2	3262.23	3093.83	3477.03	3569.66		83.1897	93.2913	96.7439	97.3844	112.549	116.859	113.752	109.901
	BPAG_0000027201	1281	IPR001544: Aminotransferase class IV; IPR005786: Branched-chain amino acid aminotransferase II; IPR018300: Aminotransferase, class IV, conserved site; IPR033939: Branched-chain aminotransferase; IPR036038: Aminotransferase-like, PLP-dependent enzymes	GO:0003824 - MF - catalytic activity; GO:0004084 - MF - branched-chain-amino-acid transaminase activity; GO:0008152 - BP - metabolic process; GO:0009081 - BP - branched-chain amino acid metabolic process	00270: Cysteine and methionine metabolism; 00280: Valine, leucine and isoleucine degradation; 00290: Valine, leucine and isoleucine biosynthesis; 00770: Pantothenate and CoA biosynthesis; 00966: Glucosinolate biosynthesis; 01007: Amino acid related enzymes	K00826: branched-chain amino acid aminotransferase	-		Bm4739a	Y	WBGene00225000	Bm4739	Branched-chain-amino-acid aminotransferase [Source:UniProtKB/TrEMBL;Acc:A0A4E9EST0]	0	98.8	426		764	902	764	655	547	727	793	683	749	628	577		865.741	880.381	757.813	706.042	625.324	585.8	749.636	645.267	669.539	641.85	617.415		49.4389	50.3271	44.1447	40.6471	36.4836	34.4257	43.9062	38.0804
	BPAG_0000027301	1662	IPR000933: Glycoside hydrolase, family 29; IPR016286: Alpha-L-fucosidase, metazoa-type; IPR017853: Glycoside hydrolase superfamily	GO:0004560 - MF - alpha-L-fucosidase activity; GO:0005975 - BP - carbohydrate metabolic process; GO:0006004 - BP - fucose metabolic process	00511: Other glycan degradation; 04147: Exosome	K01206: alpha-L-fucosidase	-		Bm6173	Y	WBGene00226434	Bm6173	Bm6173 [Source:UniProtKB/TrEMBL;Acc:A0A0H5SCP9]	0	87.5	553		2305	2527	2370	2106	1985	2774	2406	2470	2473	2445	2169		2611.95	2466.43	2350.81	2270.11	2269.23	2235.23	2274.43	2333.54	2210.64	2498.92	2320.92		114.965	108.672	105.548	100.731	102.044	101.245	102.675	106.144
	BPAG_0000027401	1326	IPR007863: Peptidase M16, C-terminal; IPR011249: Metalloenzyme, LuxS/M16 peptidase-like; IPR011765: Peptidase M16, N-terminal	GO:0003824 - MF - catalytic activity; GO:0046872 - MF - metal ion binding	00190: Oxidative phosphorylation; 01002: Peptidases and inhibitors; 04260: Cardiac muscle contraction; 04714: Thermogenesis; 04932: Non-alcoholic fatty liver disease (NAFLD); 05010: Alzheimer disease; 05012: Parkinson disease; 05016: Huntington disease	K00415: ubiquinol-cytochrome c reductase core subunit 2	M16B		Bm5980	Y	WBGene00226241	Bm5980	Bm5980 [Source:UniProtKB/TrEMBL;Acc:A0A0H5RZB9]	2.8e-288	94.3	441		2343	2569	2457	2313	2062	2751	2355	2344	2631	2206	2083		2655.01	2507.43	2437.1	2493.24	2357.26	2216.69	2226.22	2214.5	2351.88	2254.65	2228.9		146.471	138.473	137.15	138.666	132.863	125.848	125.965	126.254
	BPAG_0000027501	699	-	-	-	-	-		Bm7730	Y	WBGene00227991	Bm7730	Bm7730 [Source:UniProtKB/TrEMBL;Acc:A0A0H5S0H2]	2.3e-124	77.1	258		923	1077	1117	994	985	1301	1214	1241	1241	983	980		1045.91	1051.19	1107.95	1071.46	1126.04	1048.32	1147.62	1172.44	1109.34	1004.68	1048.64		109.458	110.124	118.28	113.044	120.398	112.901	123.181	126.801
	BPAG_0000027601	1131	-	GO:0003676 - MF - nucleic acid binding	03009: Ribosome biogenesis	K14837: nucleolar protein 12	-		Bm3300	Y	WBGene00223561	Bm3300	Bm3300, isoform h [Source:UniProtKB/TrEMBL;Acc:A0A1P6BXA7]	3.9e-14	38	137		621	760	717	633	613	804	751	725	614	587	546		703.698	741.785	711.193	682.328	700.775	647.845	709.933	684.946	548.861	599.945	584.244		45.5149	48.0281	46.9235	44.4917	46.3082	43.1213	47.0955	45.7831
	BPAG_0000027701	1110	-	GO:0016020 - CC - membrane	04052: Cytokines and growth factors; 04147: Exosome; 04360: Axon guidance	K05463: ephrin-B	-		Bm2726a	Y	WBGene00222987	Bma-efn-4	BMA-EFN-4 [Source:UniProtKB/TrEMBL;Acc:A0A5S6PIJ9]	2.7e-224	97.8	317		444	472	484	391	398	557	539	478	427	356	359		503.127	460.687	480.08	421.469	454.989	448.818	509.526	451.592	381.7	363.851	384.146		33.1577	30.3923	32.2743	28.0021	30.6351	30.439	34.4404	30.7563
	BPAG_0000027801	495	-	-	-	-	-		-	-	-	-	-	-	-	-		18	35	25	14	15	17	18	12	10	15	9		20.397	34.1611	24.7975	15.091	17.1478	13.6982	17.0157	11.337	8.93911	15.3308	9.63039		3.01434	5.05368	3.73826	2.24833	2.58908	2.08325	2.57911	1.73143
	BPAG_0000027901	318	-	-	-	-	-		-	-	-	-	-	-	-	-		1	1	1	0	3	1	2	1	2	1	2		1.13317	0.976033	0.991902	0	3.42957	0.805777	1.89063	0.944753	1.78782	1.02205	2.14009		0.260674	0.224759	0.232759	0	0.806035	0.190753	0.446072	0.224596
	BPAG_0000028001	945	-	GO:0020037 - MF - heme binding	-	-	-		Bm4464	Y	WBGene00224725	Bma-glb-19	GLOBIN domain-containing protein [Source:UniProtKB/TrEMBL;Acc:A0A4E9EST9]	4.6e-155	79.5	283		215	246	206	194	157	225	173	184	226	221	163		243.631	240.104	204.332	209.118	179.481	181.3	163.54	173.835	202.024	225.874	174.417		18.8595	18.6058	16.135	16.3195	14.1947	14.4427	12.9842	13.9064
	BPAG_0000028101	867	IPR019402: Frag1/DRAM/Sfk1	-	-	-	-		Bm6293	Y	WBGene00226554	Bm6293	-	1.1e-185	98.8	256		58	84	105	76	84	86	96	96	89	88	93		65.7238	81.9867	104.15	81.9224	96.0279	69.2968	90.7504	90.6963	79.5581	89.9407	99.514		5.5454	6.92476	8.96405	6.96838	8.2779	6.01696	7.85333	7.90828
	BPAG_0000028201	912	IPR000719: Protein kinase domain; IPR008271: Serine/threonine-protein kinase, active site; IPR011009: Protein kinase-like domain superfamily; IPR017441: Protein kinase, ATP binding site	GO:0004672 - MF - protein kinase activity; GO:0005524 - MF - ATP binding; GO:0006468 - BP - protein phosphorylation	01001: Protein kinases; 04012: ErbB signaling pathway; 04020: Calcium signaling pathway; 04024: cAMP signaling pathway; 04066: HIF-1 signaling pathway; 04114: Oocyte meiosis; 04217: Necroptosis; 04261: Adrenergic signaling in cardiomyocytes; 04310: Wnt signaling pathway; 04360: Axon guidance; 04713: Circadian entrainment; 04720: Long-term potentiation; 04722: Neurotrophin signaling pathway; 04725…	K04515: calcium/calmodulin-dependent protein kinase (CaM kinase) II	-		Bm5007a	Y	WBGene00225268	Bma-unc-43	BMA-UNC-43, isoform b; BMA-UNC-43, isoform e [Source:UniProtKB/TrEMBL;Acc:A0A0H5RZK8]	1.2e-222	100	299		336	424	438	388	424	635	523	494	548	485	451		380.745	413.838	434.453	418.236	484.712	511.668	494.401	466.708	489.863	495.696	482.589		30.54	33.2289	35.5479	33.8201	39.722	42.2354	40.6732	38.6867
	BPAG_0000028301	681	-	-	-	-	-		Bm5007a	N	WBGene00225268	Bma-unc-43	BMA-UNC-43, isoform b; BMA-UNC-43, isoform e [Source:UniProtKB/TrEMBL;Acc:A0A0H5RZK8]	7.2e-12	80.5	41		78	63	80	66	92	141	95	72	104	71	87		88.3871	61.4901	79.3521	71.1432	105.173	113.615	89.8051	68.0222	92.9667	72.5658	93.0938		9.49449	6.61208	8.69515	7.70432	11.5425	12.5594	9.89414	7.55119
	BPAG_0000028401	468	IPR013543: Calcium/calmodulin-dependent protein kinase II, association-domain; IPR032710: NTF2-like domain superfamily	GO:0004683 - MF - calmodulin-dependent protein kinase activity; GO:0005516 - MF - calmodulin binding; GO:0006468 - BP - protein phosphorylation	01001: Protein kinases; 04012: ErbB signaling pathway; 04020: Calcium signaling pathway; 04024: cAMP signaling pathway; 04066: HIF-1 signaling pathway; 04114: Oocyte meiosis; 04217: Necroptosis; 04261: Adrenergic signaling in cardiomyocytes; 04310: Wnt signaling pathway; 04360: Axon guidance; 04713: Circadian entrainment; 04720: Long-term potentiation; 04722: Neurotrophin signaling pathway; 04725…	K04515: calcium/calmodulin-dependent protein kinase (CaM kinase) II	-		Bm5007a	N	WBGene00225268	Bma-unc-43	BMA-UNC-43, isoform b; BMA-UNC-43, isoform e [Source:UniProtKB/TrEMBL;Acc:A0A0H5RZK8]	3.4e-102	100	140		270	339	364	374	293	481	384	442	414	350	372		305.956	330.875	361.052	403.145	334.954	387.579	363.002	417.581	370.079	357.719	398.056		47.8236	51.7724	57.5691	63.5277	53.4911	62.3444	58.1952	67.4538
	BPAG_0000028501	2775	IPR015421: Pyridoxal phosphate-dependent transferase, major domain; IPR015424: Pyridoxal phosphate-dependent transferase	GO:0003824 - MF - catalytic activity	-	-	-		Bm14753	Y	WBGene00234938	Bm14753	Bm14753, isoform a; Bm14753, isoform b [Source:UniProtKB/TrEMBL;Acc:A0A0H5RZD5]	0	92.6	857		1148	1139	1284	1002	956	1442	1262	1397	1382	1092	1151		1300.88	1111.7	1273.6	1080.08	1092.89	1161.93	1192.99	1319.82	1235.38	1116.08	1231.62		34.2928	29.3363	34.2481	28.704	29.4344	31.521	32.2551	35.9553
	BPAG_0000028601	2034	-	GO:0003676 - MF - nucleic acid binding	03000: Transcription factors; 04371: Apelin signaling pathway; 04912: GnRH signaling pathway; 04928: Parathyroid hormone synthesis, secretion and action; 04933: AGE-RAGE signaling pathway in diabetic complications; 05020: Prion diseases; 05166: Human T-cell leukemia virus 1 infection	K09203: early growth response protein 1	-		Bm2429a	Y	WBGene00222690	Bm2429	Zinc finger, C2H2 type family protein [Source:UniProtKB/TrEMBL;Acc:A8Q229]	0	89.6	546		5333	6414	5777	5379	4966	6743	5941	6082	5798	5229	5170		6043.19	6260.27	5730.22	5798.17	5677.08	5433.36	5616.13	5745.99	5182.9	5344.32	5532.12		217.343	225.384	210.226	210.227	208.601	201.095	207.162	213.563
	BPAG_0000028701	477	-	-	-	-	-		Bm7729	Y	WBGene00227990	Bm7729	-	1.5e-46	54.4	158		140	161	173	122	154	213	157	161	189	164	182		158.644	157.141	171.599	131.507	176.051	171.631	148.415	152.105	168.949	167.617	194.748		24.3295	24.1242	26.8449	20.3319	27.5843	27.0869	23.3444	24.1067
	BPAG_0000028801	264	-	-	-	-	-		-	-	-	-	-	-	-	-		13	17	18	21	9	19	12	16	26	24	18		14.7312	16.5926	17.8542	22.6365	10.2887	15.3098	11.3438	15.1161	23.2417	24.5293	19.2608		4.08191	4.60246	5.04665	6.32343	2.91272	4.36564	3.22388	4.32858
	BPAG_0000028901	918	-	GO:0005515 - MF - protein binding	-	-	-		Bm9191	Y	WBGene00229452	Bm9191	ANK_REP_REGION domain-containing protein [Source:UniProtKB/TrEMBL;Acc:A0A4E9EVC4]	5e-145	99	305		367	440	408	387	337	539	377	349	435	392	401		415.873	429.454	404.696	417.158	385.255	434.314	356.385	329.719	388.851	400.645	429.087		33.1396	34.2574	32.8967	33.5124	31.3651	35.6159	29.1273	27.1527
	BPAG_0000029001	336	-	-	-	-	-		-	-	-	-	-	-	-	-		432	665	580	517	570	755	543	584	337	512	452		489.529	649.062	575.303	557.288	651.618	608.362	513.307	551.736	301.248	523.291	483.66		106.578	141.458	127.768	122.318	144.942	136.303	114.621	124.138
	BPAG_0000029101	366	-	-	-	-	-		Bm17886	N	WBGene00269028	Bm17886	-	1e-16	36.5	104		160	202	177	154	160	280	170	163	141	149	191		181.307	197.159	175.567	166.001	182.91	225.618	160.704	153.995	126.041	152.286	204.378		36.2379	39.4471	35.7953	33.4485	37.3507	46.4061	32.9435	31.808
	BPAG_0000029201	408	-	-	-	-	-		-	-	-	-	-	-	-	-		59	93	64	69	92	107	73	103	58	73	82		66.8569	90.771	63.4817	74.3769	105.173	86.2182	69.0082	97.3096	51.8468	74.6099	87.7435		11.9872	16.2917	11.6106	13.4439	19.2658	15.9082	12.6901	18.0305
	BPAG_0000029301	516	IPR008723: RNA-dependent RNA polymerase, orbiviral	GO:0003723 - MF - RNA binding; GO:0003968 - MF - RNA-directed RNA polymerase activity; GO:0006351 - BP - transcription, DNA-templated	-	-	-		-	-	-	-	-	-	-	-		73	79	62	72	88	120	91	113	86	76	83		82.7213	77.1066	61.4979	77.6107	100.601	96.6933	86.0239	106.757	76.8763	77.6761	88.8136		11.7273	10.9426	8.89357	11.0923	14.5711	14.1068	12.5082	15.6408
	BPAG_0000029401	500	-	-	-	-	-		-	-	-	-	-	-	-	-		56	65	96	74	90	90	78	79	82	71	83		63.4574	63.4421	95.2226	79.7666	102.887	72.5199	73.7347	74.6355	73.3007	72.5658	88.8136		9.28415	9.29155	14.2114	11.7652	15.3791	10.9187	11.0644	11.2846
	BPAG_0000029501	459	-	GO:0005509 - MF - calcium ion binding	01009: Protein phosphatases and associated proteins; 03036: Chromosome and associated proteins; 04014: Ras signaling pathway; 04015: Rap1 signaling pathway; 04016: MAPK signaling pathway - plant; 04020: Calcium signaling pathway; 04022: cGMP-PKG signaling pathway; 04024: cAMP signaling pathway; 04070: Phosphatidylinositol signaling system; 04114: Oocyte meiosis; 04131: Membrane trafficking; 04147…	K02183: calmodulin	-		Bm2346a	Y	WBGene00222607	Bma-cal-5	BMA-CAL-5 [Source:UniProtKB/TrEMBL;Acc:A0A5S6PHG8]	3.5e-88	94	151		382	402	398	404	332	451	445	397	421	383	344		432.87	392.365	394.777	435.482	379.539	363.406	420.666	375.067	376.337	391.446	368.095		68.9882	62.5977	64.1807	69.9691	61.7995	59.6021	68.7621	61.7743
	BPAG_0000029601	2940	-	-	-	-	-		Bm5950a	Y	WBGene00226211	Bm5950	Bm5950, isoform c [Source:UniProtKB/TrEMBL;Acc:A0A0J9XPN6]	0	84.3	908		967	1212	1186	930	994	1385	1043	1243	1079	1135	1264		1095.77	1182.95	1176.4	1002.47	1136.33	1116	985.966	1174.33	964.53	1160.03	1352.53		27.2649	29.4646	29.8587	25.1462	28.8868	28.5759	25.1616	30.1963
	BPAG_0000029701	432	-	-	-	-	-		Bm5950a	N	WBGene00226211	Bm5950	Bm5950, isoform c [Source:UniProtKB/TrEMBL;Acc:A0A0J9XPN6]	2.3e-72	92.9	141		97	112	136	116	141	206	132	171	153	152	140		109.917	109.316	134.899	125.039	161.19	165.99	124.782	161.553	136.768	155.352	149.806		18.6128	18.5302	23.3018	21.3458	27.8866	28.9255	21.6716	28.2711
	BPAG_0000029801	1035	IPR010795: Prenylcysteine lyase	GO:0016670 - MF - oxidoreductase activity, acting on a sulfur group of donors, oxygen as acceptor; GO:0030328 - BP - prenylcysteine catabolic process; GO:0055114 - BP - oxidation-reduction process	00900: Terpenoid backbone biosynthesis	K05906: prenylcysteine oxidase / farnesylcysteine lyase	-		Bm13251	Y	WBGene00233512	Bm13251	-	8.1e-140	64	339		707	856	909	769	773	1041	908	957	900	817	798		801.15	835.484	901.639	828.926	883.685	838.814	858.348	904.129	804.52	835.018	853.894		56.6244	59.1124	65.0066	59.0641	63.8115	61.011	62.2225	66.0391
	BPAG_0000029901	1818	-	GO:0005515 - MF - protein binding	02000: Transporters; 03029: Mitochondrial biogenesis	K17768: mitochondrial import receptor subunit TOM70	-		Bm9184	Y	WBGene00229445	Bm9184	Bm9184, isoform f [Source:UniProtKB/TrEMBL;Acc:A0A1I9G0S9]	0	98.3	583		2940	3401	3218	3081	2758	3778	3485	3486	3667	2796	2820		3331.52	3319.49	3191.94	3321.09	3152.91	3044.23	3294.43	3293.41	3277.97	2857.66	3017.52		134.053	133.708	131.017	134.721	129.616	126.057	135.96	136.95
	BPAG_0000030001	954	-	-	-	-	-		Bm1868	Y	WBGene00222129	Bm1868	Bm1868 [Source:UniProtKB/TrEMBL;Acc:A0A1U7F3T9]	2.7e-231	99.7	317		1335	1629	1591	1205	1154	1740	1331	1295	1450	1282	1112		1512.78	1589.96	1578.12	1298.9	1319.24	1402.05	1258.22	1223.46	1296.17	1310.27	1189.89		116	122.044	123.44	100.41	103.352	110.637	98.9536	96.9507
	BPAG_0000030101	2097	IPR004895: Prenylated rab acceptor PRA1	-	-	-	-		Bm14761a	Y	WBGene00234946	Bm14761	Bm14761, isoform a; Bm14761, isoform b [Source:UniProtKB/TrEMBL;Acc:A0A0H5S5K2]	5.9e-305	92	485		2534	2860	2896	2615	2412	3384	3071	2972	3487	2949	2658		2871.45	2791.45	2872.55	2818.78	2757.37	2726.75	2903.07	2807.81	3117.07	3014.04	2844.17		100.169	97.4793	102.22	99.1313	98.274	97.8881	103.868	101.223
	BPAG_0000030201	915	IPR001680: WD40 repeat; IPR015943: WD40/YVTN repeat-like-containing domain superfamily; IPR017986: WD40-repeat-containing domain; IPR036322: WD40-repeat-containing domain superfamily	GO:0005515 - MF - protein binding	03013: RNA transport; 03019: Messenger RNA biogenesis; 04131: Membrane trafficking; 04141: Protein processing in endoplasmic reticulum; 04150: mTOR signaling pathway	K14004: protein transport protein SEC13	-		Bm7155a	Y	WBGene00227416	Bma-npp-20	WD_REPEATS_REGION domain-containing protein [Source:UniProtKB/TrEMBL;Acc:A0A4E9ETF9]	2.8e-206	99.3	304		1386	1593	1606	1362	1223	1727	1459	1437	1566	1312	1273		1570.57	1554.82	1592.99	1468.14	1398.12	1391.58	1379.22	1357.61	1399.86	1340.93	1362.17		125.564	124.434	129.915	118.33	114.2	114.49	113.093	112.167
	BPAG_0000030301	552	IPR002478: PUA domain; IPR004521: Uncharacterised domain CHP00451; IPR015947: PUA-like superfamily; IPR016437: MCT-1/Tma20; IPR036974: PUA domain superfamily	GO:0003723 - MF - RNA binding	99974: Translation	K07575: PUA domain protein	-		Bm2149	Y	WBGene00222410	Bm2149	PUA domain-containing protein [Source:UniProtKB/TrEMBL;Acc:A0A4E9EWK7]	1e-132	98.4	183		992	1178	985	983	809	1146	1041	997	1143	959	875		1124.1	1149.77	977.023	1059.6	924.84	923.421	984.075	941.919	1021.74	980.149	936.288		148.969	152.529	132.078	141.564	125.219	125.934	133.756	128.999
	BPAG_0000030401	1191	IPR007243: Atg6/Beclin; IPR038274: Atg6/Beclin C-terminal domain superfamily	GO:0006914 - BP - autophagy	03029: Mitochondrial biogenesis; 04131: Membrane trafficking; 04136: Autophagy - other; 04137: Mitophagy - animal; 04138: Autophagy - yeast; 04140: Autophagy - animal; 04215: Apoptosis - multiple species; 04371: Apelin signaling pathway; 05017: Spinocerebellar ataxia; 05131: Shigellosis; 05167: Kaposi sarcoma-associated herpesvirus infection	K08334: beclin 1	-		Bm5850a	Y	WBGene00226111	Bma-bec-1	BMA-BEC-1, isoform b; BMA-BEC-1, isoform c [Source:UniProtKB/TrEMBL;Acc:A0A0J9XQS0]	2e-272	96.2	396		1971	2268	2148	2060	1742	2585	2200	2255	2404	1892	1923		2233.48	2213.64	2130.6	2220.53	1991.43	2082.93	2079.7	2130.42	2148.96	1933.73	2057.69		137.183	136.106	133.492	137.497	124.967	131.658	131.012	135.227
	BPAG_0000030501	585	IPR005225: Small GTP-binding protein domain; IPR006687: Small GTPase superfamily, SAR1-type; IPR006689: Small GTPase superfamily, ARF/SAR type; IPR027417: P-loop containing nucleoside triphosphate hydrolase	GO:0005525 - MF - GTP binding; GO:0005622 - CC - intracellular; GO:0006886 - BP - intracellular protein transport	04031: GTP-binding proteins; 04131: Membrane trafficking; 04141: Protein processing in endoplasmic reticulum; 05134: Legionellosis	K07953: GTP-binding protein SAR1	-		Bm13657a	Y	WBGene00233918	Bma-sar-1	BMA-SAR-1, isoform a; BMA-SAR-1, isoform b [Source:UniProtKB/TrEMBL;Acc:A0A1U7F0C2]	3.2e-146	99.5	194		5402	6558	6026	5323	4911	6777	5728	5983	6687	5468	5039		6121.38	6400.82	5977.2	5737.8	5614.2	5460.75	5414.78	5652.46	5977.58	5588.59	5391.95		765.461	801.236	762.443	723.333	717.255	702.716	694.463	730.454
	BPAG_0000030601	1386	-	-	-	-	-		Bm4078	Y	WBGene00224339	Bm4078	-	1.7e-251	95.9	365		1205	1315	1328	1165	1056	1433	1215	1162	1228	1240	1103		1365.47	1283.48	1317.25	1255.78	1207.21	1154.68	1148.56	1097.8	1097.72	1267.35	1180.26		72.0689	67.8121	70.9201	66.819	65.0969	62.7164	62.1749	59.8787
	BPAG_0000030701	1692	-	GO:0000278 - BP - mitotic cell cycle; GO:0005515 - MF - protein binding; GO:0015031 - BP - protein transport; GO:0035091 - MF - phosphatidylinositol binding	04131: Membrane trafficking; 05132: Salmonella infection	K17923: sorting nexin-9/18/33	-		Bm6372	Y	WBGene00226633	Bma-lst-4	Sorting nexin [Source:UniProtKB/TrEMBL;Acc:A0A4E9ETY5]	0	99.3	563		1727	2004	1937	1752	1704	2457	2083	2141	2139	1862	1827		1956.98	1955.97	1921.31	1888.53	1947.99	1979.79	1969.1	2022.72	1912.08	1903.06	1954.97		84.6089	84.653	84.7351	82.3135	86.0457	88.0852	87.3154	90.3745
	BPAG_0000030801	1581	-	-	-	-	-		Bm9183a	Y	WBGene00229444	Bm9183	Bm9183 [Source:UniProtKB/TrEMBL;Acc:A0A0H5S4S2]	0	96.4	526		4810	5432	5037	4735	3730	5561	4699	4804	5348	4390	3992		5450.54	5301.81	4996.21	5103.98	4264.09	4480.93	4442.05	4538.59	4780.64	4486.81	4271.61		252.196	245.569	235.817	238.081	201.575	213.363	210.802	217.021
	BPAG_0000030901	4380	-	GO:0005515 - MF - protein binding; GO:0005856 - CC - cytoskeleton	01009: Protein phosphatases and associated proteins; 04210: Apoptosis	K02374: tyrosine-protein phosphatase non-receptor type 13	-		Bm6419a	Y	WBGene00226680	Bm6419	Bm6419 [Source:UniProtKB/TrEMBL;Acc:A0A5S6PSR6]	0	95.6	1460		2601	3238	3191	3059	3622	4907	4046	3992	3911	3955	3704		2947.37	3160.39	3165.16	3297.38	4140.63	3953.95	3824.75	3771.46	3496.09	4042.22	3963.44		49.2255	52.8381	53.9246	55.5192	70.6536	67.9579	65.5169	65.0948
	BPAG_0000031001	1560	IPR000095: CRIB domain; IPR000719: Protein kinase domain; IPR001245: Serine-threonine/tyrosine-protein kinase, catalytic domain; IPR008266: Tyrosine-protein kinase, active site; IPR011009: Protein kinase-like domain superfamily; IPR017441: Protein kinase, ATP binding site; IPR020635: Tyrosine-protein kinase, catalytic domain	GO:0004672 - MF - protein kinase activity; GO:0004713 - MF - protein tyrosine kinase activity; GO:0005524 - MF - ATP binding; GO:0006468 - BP - protein phosphorylation	-	-	-		Bm1870a	Y	WBGene00222131	Bma-ark-1	BMA-ARK-1, isoform b; BMA-ARK-1, isoform c [Source:UniProtKB/TrEMBL;Acc:A0A0J9XQL3]	0	94.9	510		1727	2151	1918	1740	1643	2205	2066	2065	1957	1723	1785		1956.98	2099.45	1902.47	1875.59	1878.26	1776.74	1953.03	1950.92	1749.38	1761	1910.03		91.7681	98.5509	91.0035	88.667	89.9855	85.7397	93.9307	94.5421
	BPAG_0000031101	300	-	-	-	-	-		-	-	-	-	-	-	-	-		126	119	125	125	103	136	111	113	148	136	102		142.779	116.148	123.988	134.741	117.748	109.586	104.93	106.757	132.299	138.999	109.144		34.8156	28.3511	30.8406	33.1227	29.3343	27.4989	26.2424	26.9021
	BPAG_0000031201	1587	IPR000467: G-patch domain; IPR000504: RNA recognition motif domain; IPR003954: RNA recognition motif domain, eukaryote; IPR012677: Nucleotide-binding alpha-beta plait domain superfamily; IPR034653: SPF45, RNA recognition motif; IPR035979: RNA-binding domain superfamily	GO:0003676 - MF - nucleic acid binding	03040: Spliceosome; 03041: Spliceosome	K12840: splicing factor 45	-		Bm4547	Y	WBGene00224808	Bma-rbm-17	Bm4547 [Source:UniProtKB/TrEMBL;Acc:A0A0K0JF59]	9.6e-240	99.7	347		3155	3697	3437	3131	2968	3927	3422	3401	3575	3154	3046		3575.15	3608.39	3409.17	3374.99	3392.98	3164.29	3234.88	3213.11	3195.73	3223.56	3259.35		164.796	166.501	160.301	156.835	159.789	150.1	152.934	153.059
	BPAG_0000031301	1671	IPR000595: Cyclic nucleotide-binding domain; IPR014710: RmlC-like jelly roll fold; IPR018488: Cyclic nucleotide-binding, conserved site; IPR018490: Cyclic nucleotide-binding-like	-	04024: cAMP signaling pathway; 04040: Ion channels; 04740: Olfactory transduction	K04950: cyclic nucleotide gated channel alpha 3	-		Bm7148	Y	WBGene00227409	Bm7148	Cyclic nucleotide-binding domain-containing protein [Source:UniProtKB/TrEMBL;Acc:A0A4E9ETZ4]	4.2e-305	86	508		273	276	327	264	276	345	294	309	279	297	272		309.355	269.385	324.352	284.573	315.52	277.993	277.923	291.929	249.401	303.55	291.052		13.5429	11.8053	14.4846	12.5593	14.1121	12.5239	12.4788	13.2072
	BPAG_0000031401	339	-	-	-	-	-		-	-	-	-	-	-	-	-		5	7	8	6	6	3	4	4	3	5	10		5.66584	6.83223	7.93521	6.46756	6.85913	2.41733	3.78127	3.77901	2.68173	5.11027	10.7004		1.22263	1.47585	1.74672	1.40698	1.51221	0.536809	0.836878	0.842733
	BPAG_0000031501	339	-	-	-	-	-		Bm17946	Y	WBGene00269088	Bm17946	-	1.1e-75	95.5	112		15	19	26	8	15	18	23	19	11	11	14		16.9975	18.5446	25.7894	8.62341	17.1478	14.504	21.7423	17.9503	9.83302	11.2426	14.9806		3.66789	4.00589	5.67686	1.87598	3.78052	3.22085	4.81205	4.00298
	BPAG_0000031601	339	-	-	-	-	-		-	-	-	-	-	-	-	-		171	173	177	150	133	190	213	190	219	224	183		193.772	168.854	175.567	161.689	152.044	153.098	201.353	179.503	195.766	228.94	195.818		41.8139	36.4747	38.6463	35.1746	33.5206	33.9979	44.5637	40.0298
	BPAG_0000031701	2199	IPR004245: Protein of unknown function DUF229; IPR017849: Alkaline phosphatase-like, alpha/beta/alpha; IPR017850: Alkaline-phosphatase-like, core domain superfamily	GO:0003824 - MF - catalytic activity; GO:0008152 - BP - metabolic process	-	-	-		Bm6519	Y	WBGene00226780	Bm6519	-	0	98.6	716		894	1053	1182	1220	1298	1812	1545	1395	1688	1476	1334		1013.05	1027.76	1172.43	1315.07	1483.86	1460.07	1460.51	1317.93	1508.92	1508.55	1427.44		33.7005	34.2254	39.7856	44.1034	50.4324	49.984	49.8316	45.3084
	BPAG_0000031801	276	-	-	-	-	-		-	-	-	-	-	-	-	-		23	26	34	24	18	44	21	21	45	37	32		26.0629	25.3768	33.7247	25.8702	20.5774	35.4542	19.8517	19.8398	40.226	37.816	34.2414		6.90785	6.73301	9.11809	6.91257	5.57216	9.67034	5.3965	5.43425
	BPAG_0000031901	237	-	-	-	-	-		-	-	-	-	-	-	-	-		9	15	8	12	11	15	14	17	22	25	19		10.1985	14.6405	7.93521	12.9351	12.5751	12.0867	13.2344	16.0608	19.666	25.5513	20.3308		3.14788	4.52364	2.49848	4.02504	3.96556	3.8392	4.18969	5.12307
	BPAG_0000032001	279	IPR026193: NADH-ubiquinone oxidoreductase flavoprotein 3	GO:0005739 - CC - mitochondrion; GO:0005747 - CC - mitochondrial respiratory chain complex I	-	-	-		Bm9348	Y	WBGene00229609	Bm9348	Bm9348 [Source:UniProtKB/TrEMBL;Acc:A0A0K0JYY9]	2.1e-59	95.6	91		169	148	166	181	163	233	185	224	227	199	172		191.505	144.453	164.656	195.105	186.34	187.746	174.884	211.625	202.918	203.389	184.047		50.2119	37.9142	44.0391	51.5717	49.9164	50.6582	47.0294	57.3421
	BPAG_0000032101	1764	IPR003323: OTU domain; IPR004910: Yippee/Mis18/Cereblon; IPR034751: Yippee domain	-	01002: Peptidases and inhibitors; 04121: Ubiquitin system; 04622: RIG-I-like receptor signaling pathway	K12655: OTU domain-containing protein 5	C85A		Bm1848	Y	WBGene00222109	Bma-otub-4	OTU-like cysteine protease family protein [Source:UniProtKB/TrEMBL;Acc:A0A4E9EU32]	2.3e-264	94	402		1965	2426	2333	2092	2019	2760	2512	2463	2709	2163	2100		2226.68	2367.85	2314.11	2255.02	2308.1	2223.94	2374.64	2326.93	2421.6	2210.7	2247.09		92.3396	98.2963	97.8927	94.2759	97.7907	94.9093	101	99.7231
	BPAG_0000032201	483	IPR020328: Uncharacterised protein family T05H10.3	-	-	-	-		Bm363	Y	WBGene00220624	Bm363	Hypothetical 18.4 kDa protein T05H10.3 in chromosome II, putative [Source:UniProtKB/TrEMBL;Acc:A0A4E9EV79]	3.9e-119	98.8	160		15	26	37	26	23	33	32	30	33	23	29		16.9975	25.3768	36.7004	28.0261	26.2933	26.5906	30.2501	28.3426	29.4991	23.5072	31.0313		2.57435	3.84743	5.67007	4.27921	4.06856	4.14443	4.69899	4.43613
	BPAG_0000032301	1089	IPR000719: Protein kinase domain; IPR003527: Mitogen-activated protein (MAP) kinase, conserved site; IPR008271: Serine/threonine-protein kinase, active site; IPR008351: Mitogen-activated protein (MAP) kinase, JNK; IPR011009: Protein kinase-like domain superfamily	GO:0004672 - MF - protein kinase activity; GO:0004707 - MF - MAP kinase activity; GO:0005524 - MF - ATP binding; GO:0006468 - BP - protein phosphorylation	01001: Protein kinases; 01522: Endocrine resistance; 04010: MAPK signaling pathway; 04012: ErbB signaling pathway; 04013: MAPK signaling pathway - fly; 04014: Ras signaling pathway; 04024: cAMP signaling pathway; 04068: FoxO signaling pathway; 04071: Sphingolipid signaling pathway; 04137: Mitophagy - animal; 04140: Autophagy - animal; 04141: Protein processing in endoplasmic reticulum; 04210: Apo…	K04440: c-Jun N-terminal kinase	-		Bm9350	Y	WBGene00229611	Bm9350	Mitogen-activated protein kinase [Source:UniProtKB/TrEMBL;Acc:A0A4E9ETV9]	1.7e-267	99.2	358		96	92	121	105	107	147	143	134	170	170	138		108.784	89.795	120.02	113.182	122.321	118.449	135.18	126.597	151.965	173.749	147.666		7.30748	6.03816	8.22416	7.66477	8.3949	8.18818	9.31344	8.78834
	BPAG_0000032401	405	IPR001534: Transthyretin-like; IPR038479: Transthyretin-like superfamily	GO:0005615 - CC - extracellular space	-	-	-		Bm9346	Y	WBGene00229607	Bm9346	Bm9346 [Source:UniProtKB/TrEMBL;Acc:A0A0J9XRW3]	2.9e-97	100	134		473	481	423	453	337	525	440	450	560	451	372		535.989	469.472	419.574	488.301	385.255	423.033	415.94	425.139	500.59	460.946	398.056		96.8123	84.8858	77.3071	88.9161	71.0943	78.6325	77.0548	79.3574
	BPAG_0000032501	4131	IPR000626: Ubiquitin domain; IPR029071: Ubiquitin-like domain superfamily	GO:0005515 - MF - protein binding	-	-	-		Bm9345	Y	WBGene00229606	Bm9345	Ubiquitin family protein [Source:UniProtKB/TrEMBL;Acc:A0A4E9EYW0]	0	96.9	1376		8340	9990	9195	9058	8708	12757	10757	10471	11048	9711	9252		9450.63	9750.57	9120.54	9763.86	9954.89	10279.3	10168.8	9892.51	9875.93	9925.16	9900.04		167.354	172.844	164.752	174.307	180.104	187.323	184.688	181.035
	BPAG_0000032601	882	IPR007303: TIP41-like protein	-	01009: Protein phosphatases and associated proteins; 04138: Autophagy - yeast	K17607: type 2A phosphatase activator TIP41	-		Bm7539	Y	WBGene00227800	Bm7539	Bm7539 [Source:UniProtKB/TrEMBL;Acc:A0A0K0JST7]	2.4e-222	99.3	293		579	665	700	646	563	830	715	739	792	671	646		656.105	649.062	694.331	696.341	643.615	668.795	675.902	698.173	707.977	685.798	691.248		54.417	53.8887	58.744	58.2239	54.538	57.0831	57.4962	59.8419
	BPAG_0000032701	1632	-	GO:0008289 - MF - lipid binding	-	-	-		Bm7404	Y	WBGene00227665	Bm7404	-	0	98.9	543		470	575	653	612	649	894	630	611	824	707	629		532.589	561.219	647.712	659.691	741.93	720.365	595.55	577.244	736.583	722.592	673.057		23.8727	25.1821	29.6161	29.8105	33.9769	33.2289	27.3793	26.7393
	BPAG_0000032801	2796	-	GO:0003774 - MF - motor activity; GO:0003777 - MF - microtubule motor activity; GO:0005515 - MF - protein binding; GO:0005524 - MF - ATP binding; GO:0007018 - BP - microtubule-based movement; GO:0008017 - MF - microtubule binding; GO:0016459 - CC - myosin complex; GO:0051015 - MF - actin filament binding	04022: cGMP-PKG signaling pathway; 04260: Cardiac muscle contraction; 04261: Adrenergic signaling in cardiomyocytes; 04812: Cytoskeleton proteins; 04919: Thyroid hormone signaling pathway; 05410: Hypertrophic cardiomyopathy (HCM); 05414: Dilated cardiomyopathy (DCM); 05416: Viral myocarditis	K17751: myosin heavy chain 6/7	-		Bm11601	Y	WBGene00231862	Bma-nmy-3	Myosin motor domain-containing protein [Source:UniProtKB/TrEMBL;Acc:A0A4E9EXB6]	0	97	940		107	193	174	150	206	332	213	214	189	221	233		121.249	188.374	172.591	161.689	235.497	267.518	201.353	202.177	168.949	225.874	249.32		3.17228	4.93361	4.60624	4.26473	6.29491	7.20276	5.40311	5.46646
	BPAG_0000032901	1452	-	-	-	-	-		Bm11601	N	WBGene00231862	Bma-nmy-3	Myosin motor domain-containing protein [Source:UniProtKB/TrEMBL;Acc:A0A4E9EXB6]	1.3e-250	89.1	475		133	269	248	181	209	415	226	262	219	249	226		150.711	262.553	245.992	195.105	238.926	334.398	213.642	247.525	195.766	254.491	241.83		7.59293	13.2413	12.6421	9.90945	12.2981	17.3372	11.0394	12.8874
	BPAG_0000033001	1002	IPR007846: RNA-recognition motif (RRM) Nup35-type domain; IPR012677: Nucleotide-binding alpha-beta plait domain superfamily; IPR017389: Nucleoporin, NUP53; IPR035979: RNA-binding domain superfamily	GO:0003676 - MF - nucleic acid binding; GO:0006913 - BP - nucleocytoplasmic transport; GO:0031965 - CC - nuclear membrane	03013: RNA transport; 03019: Messenger RNA biogenesis	K14313: nuclear pore complex protein Nup53	-		Bm5256a	Y	WBGene00225517	Bma-npp-19	Nucleoporin NUP53 [Source:UniProtKB/TrEMBL;Acc:A0A1P6C4S5]	2e-225	99.1	333		1123	1375	1304	1225	1132	1497	1420	1436	1519	1337	1271		1272.55	1342.04	1293.44	1320.46	1294.09	1206.25	1342.35	1356.67	1357.85	1366.49	1360.02		92.9044	98.0799	96.3261	97.1865	96.5247	90.6259	100.513	102.357
	BPAG_0000033101	432	-	GO:0003676 - MF - nucleic acid binding	-	-	-		Bm3488	Y	WBGene00223749	Bm3488	Bm3488 [Source:UniProtKB/TrEMBL;Acc:A0A0K0JAG7]	3.8e-59	97.6	84		13	21	11	11	12	19	18	15	23	14	12		14.7312	20.4967	10.9109	11.8572	13.7183	15.3098	17.0157	14.1713	20.56	14.3087	12.8405		2.4945	3.4744	1.8847	2.02417	2.37333	2.66789	2.95522	2.47992
	BPAG_0000033201	327	-	GO:0009055 - MF - electron carrier activity; GO:0020037 - MF - heme binding	01524: Platinum drug resistance; 02020: Two-component system; 04115: p53 signaling pathway; 04210: Apoptosis; 04214: Apoptosis - fly; 04215: Apoptosis - multiple species; 04932: Non-alcoholic fatty liver disease (NAFLD); 05010: Alzheimer disease; 05012: Parkinson disease; 05014: Amyotrophic lateral sclerosis (ALS); 05016: Huntington disease; 05130: Pathogenic Escherichia coli infection; 05131: Sh…	K08738: cytochrome c	-		Bm14069	Y	WBGene00234330	Bm14069	BMA-CYC-2.2 [Source:UniProtKB/TrEMBL;Acc:A0A0K0J057]	4.9e-79	100	108		2041	2203	2286	2086	1827	2546	2163	2207	2402	2018	1894		2312.8	2150.2	2267.49	2248.55	2088.61	2051.51	2044.72	2085.07	2147.17	2062.5	2026.66		517.392	481.517	517.443	507.112	477.365	472.29	469.149	482.041
	BPAG_0000033301	3675	-	GO:0005515 - MF - protein binding; GO:0005524 - MF - ATP binding	99980: Enzymes with EC numbers	K22531: -	-		Bm3294a	Y	WBGene00223555	Bma-lex-1	BMA-LEX-1, isoform f; BMA-LEX-1, isoform g [Source:UniProtKB/TrEMBL;Acc:A0A1P6BXA2]	0	94.3	1228		2431	2812	2893	2930	3090	4097	3522	3563	4051	3623	3440		2754.73	2744.6	2869.57	3158.33	3532.45	3301.27	3329.41	3366.16	3621.23	3702.9	3680.95		54.8342	54.6894	58.2674	63.3793	71.8391	67.6249	67.9726	69.245
	BPAG_0000033401	300	-	-	-	-	-		-	-	-	-	-	-	-	-		597	724	608	676	524	709	610	559	703	594	513		676.502	706.648	603.076	728.678	599.031	571.296	576.643	528.117	628.419	607.1	548.932		164.959	172.489	150.009	179.128	149.235	143.358	144.215	133.082
	BPAG_0000033501	2067	-	-	04131: Membrane trafficking; 04144: Endocytosis	K18462: WASH complex subunit FAM21	-		Bm12422a	Y	WBGene00232683	Bm12422	-	0	95.4	694		1519	1743	1752	1626	1634	2367	1886	1933	1691	1745	1663		1721.28	1701.22	1737.81	1752.71	1867.97	1907.27	1782.87	1826.21	1511.6	1783.48	1779.48		60.9174	60.2701	62.7376	62.5342	67.5416	69.4634	64.7147	66.7915
	BPAG_0000033601	1638	-	-	04361: Axon regeneration; 04723: Retrograde endocannabinoid signaling	K15528: fatty acid amide hydrolase	-		Bm6873a	Y	WBGene00227134	Bm6873	Bm6873 [Source:UniProtKB/TrEMBL;Acc:A0A5S6PTG2]	0	98.5	545		2232	2685	2536	2170	1995	2976	2424	2489	2640	2384	2132		2529.23	2620.65	2515.46	2339.1	2280.66	2397.99	2291.45	2351.49	2359.92	2436.58	2281.33		112.955	117.159	114.596	105.313	104.061	110.209	104.959	108.528
	BPAG_0000033701	669	-	-	-	-	-		Bm8490a	Y	WBGene00228751	Bm8490	Bm8490 [Source:UniProtKB/TrEMBL;Acc:A0A0K0JW17]	1.6e-131	94.1	222		144	198	202	185	158	234	182	141	194	197	126		163.176	193.254	200.364	199.416	180.624	188.552	172.048	133.21	173.419	201.345	134.825		17.8427	21.1536	22.3491	21.9828	20.1786	21.2172	19.2951	15.053
	BPAG_0000033801	1119	-	-	-	-	-		Bm1968	Y	WBGene00222229	Bm1968	Bm1968 [Source:UniProtKB/TrEMBL;Acc:A0A0H5S175]	1.8e-182	93	284		8850	9764	9665	13555	6470	10196	6829	6915	12405	9466	8677		10028.5	9529.98	9586.73	14611.3	7396.43	8215.7	6455.57	6532.97	11089	9674.76	9284.77		655.598	623.652	639.302	962.957	494.008	552.711	432.841	441.359
	BPAG_0000033901	1611	-	GO:0016021 - CC - integral component of membrane; GO:0055085 - BP - transmembrane transport	-	-	-		Bm7531a	Y	WBGene00227792	Bma-slc-17.7	Bm7531 [Source:UniProtKB/TrEMBL;Acc:A0A5S6PVH6]	0	90.7	538		543	619	649	592	590	889	706	692	769	718	626		615.311	604.164	643.744	638.133	674.481	716.336	667.394	653.769	687.418	733.834	669.847		27.9401	27.4625	29.8183	29.2122	31.2908	33.4737	31.0821	30.6789
	BPAG_0000034001	1974	-	GO:0000287 - MF - magnesium ion binding; GO:0003824 - MF - catalytic activity; GO:0030976 - MF - thiamine pyrophosphate binding	99980: Enzymes with EC numbers	K11259: acetolactate synthase-like protein	-		Bm6026	Y	WBGene00226287	Bm6026	Thiamine pyrophosphate enzyme, central domain containing protein [Source:UniProtKB/TrEMBL;Acc:A0A4E9EW44]	0	97.4	657		2155	2421	2456	2208	2196	3192	2704	2746	2988	2560	2444		2441.98	2362.97	2436.11	2380.06	2510.44	2572.04	2556.14	2594.29	2671.01	2616.46	2615.19		90.495	87.6582	92.0906	88.9179	95.0484	98.0875	97.1541	99.3535
	BPAG_0000034101	975	IPR019438: Queuosine salvage protein family	-	-	-	-		Bm2148a	Y	WBGene00222409	Bm2148	Queuosine salvage protein [Source:UniProtKB/TrEMBL;Acc:A0A5S6PGV1]	1.3e-231	92.6	338		785	1001	880	861	757	1106	1012	982	1038	949	864		889.537	977.009	872.873	928.095	865.394	891.19	956.661	927.748	927.88	969.929	924.517		66.7405	73.3794	66.8055	70.1998	66.3363	68.8095	73.6169	71.9344
	BPAG_0000034201	2835	IPR001202: WW domain; IPR014720: Double-stranded RNA-binding domain	GO:0005515 - MF - protein binding	03036: Chromosome and associated proteins	K18419: microprocessor complex subunit DGCR8	-		Bm5906	Y	WBGene00226167	Bma-pash-1	WW domain containing protein [Source:UniProtKB/TrEMBL;Acc:A0A4E9FI79]	0	98.3	916		1300	1445	1497	1363	1235	1747	1448	1462	1414	1227	1255		1473.12	1410.37	1484.88	1469.21	1411.84	1407.69	1368.82	1381.23	1263.99	1254.06	1342.9		38.0115	36.43	39.0844	38.2191	37.2198	37.3799	36.2257	36.8319
	BPAG_0000034301	531	-	-	-	-	-		-	-	-	-	-	-	-	-		0	1	0	0	0	0	0	0	1	1	0		0	0.976033	0	0	0	0	0	0	0.893911	1.02205	0		0	0.134602	0	0	0	0	0	0
	BPAG_0000034401	654	IPR000971: Globin; IPR009050: Globin-like superfamily; IPR012292: Globin/Protoglobin	GO:0019825 - MF - oxygen binding; GO:0020037 - MF - heme binding	-	-	-		Bm6332	Y	WBGene00226593	Bm6332	GLOBIN domain-containing protein [Source:UniProtKB/TrEMBL;Acc:A0A4E9FG34]	2.2e-155	99.5	217		77	67	70	82	76	101	67	59	67	82	84		87.254	65.3942	69.4331	88.39	86.8824	81.3835	63.3362	55.7404	59.892	83.8084	89.8836		9.75972	7.32221	7.92236	9.96721	9.92877	9.36789	7.26606	6.44324
	BPAG_0000034501	2395	IPR001141: Ribosomal protein L27e; IPR005824: KOW; IPR006073: GTP binding domain; IPR008991: Translation protein SH3-like domain superfamily; IPR018262: Ribosomal protein L27e, conserved site; IPR027417: P-loop containing nucleoside triphosphate hydrolase; IPR030378: Circularly permuted (CP)-type guanine nucleotide-binding (G) domain; IPR038655: Ribosomal protein L27e superfamily	GO:0003735 - MF - structural constituent of ribosome; GO:0005525 - MF - GTP binding; GO:0005622 - CC - intracellular; GO:0005840 - CC - ribosome; GO:0006412 - BP - translation	03008: Ribosome biogenesis in eukaryotes; 03009: Ribosome biogenesis	K14539: large subunit GTPase 1	-		Bm2917	Y	WBGene00223178	Bm2917	CP-type G domain-containing protein [Source:UniProtKB/TrEMBL;Acc:A0A4E9FJZ7]	0	95.9	612		4843	5445	5227	4996	4752	6241	5402	5420	5747	4763	4583		5487.94	5314.5	5184.67	5385.32	5432.43	5028.86	5106.6	5120.56	5137.31	4868.04	4904.01		167.623	162.494	161.54	165.827	169.524	158.069	159.975	161.631
	BPAG_0000034601	1068	-	GO:0001664 - MF - G-protein coupled receptor binding; GO:0003924 - MF - GTPase activity; GO:0004871 - MF - signal transducer activity; GO:0005525 - MF - GTP binding; GO:0007165 - BP - signal transduction; GO:0007186 - BP - G-protein coupled receptor signaling pathway; GO:0019001 - MF - guanyl nucleotide binding; GO:0031683 - MF - G-protein beta/gamma-subunit complex binding	04015: Rap1 signaling pathway; 04020: Calcium signaling pathway; 04022: cGMP-PKG signaling pathway; 04031: GTP-binding proteins; 04071: Sphingolipid signaling pathway; 04147: Exosome; 04261: Adrenergic signaling in cardiomyocytes; 04270: Vascular smooth muscle contraction; 04361: Axon regeneration; 04371: Apelin signaling pathway; 04540: Gap junction; 04611: Platelet activation; 04713: Circadian …	K04634: guanine nucleotide-binding protein G(q) subunit alpha	-		Bm5038	Y	WBGene00225299	Bma-egl-30	Visual iGq-alpha protein, putative [Source:UniProtKB/TrEMBL;Acc:A0A4E9FFC7]	7.3e-262	100	355		333	438	447	464	437	640	526	506	503	397	420		377.345	427.502	443.38	500.158	499.574	515.697	497.237	478.045	449.637	405.755	449.418		25.8462	29.3122	30.9792	34.537	34.9599	36.3502	34.9314	33.8383
	BPAG_0000034701	762	-	-	-	-	-		-	-	-	-	-	-	-	-		0	1	2	0	0	0	2	2	3	0	0		0	0.976033	1.9838	0	0	0	1.89063	1.88951	2.68173	0	0		0	0.0937972	0.194272	0	0	0	0.186156	0.187458
	BPAG_0000034801	1128	-	-	-	-	-		Bm5037a	Y	WBGene00225298	Bm5037	LEM domain containing protein [Source:UniProtKB/TrEMBL;Acc:A0A4E9FRH7]	1.5e-242	98	350		1280	1597	1606	1512	1331	1855	1673	1617	1935	1436	1459		1450.46	1558.72	1592.99	1629.83	1521.58	1494.72	1581.52	1527.67	1729.72	1467.67	1561.19		94.0644	101.191	105.383	106.557	100.816	99.7546	105.193	102.384
	BPAG_0000034901	1785	-	GO:0003676 - MF - nucleic acid binding	03000: Transcription factors; 05168: Herpes simplex virus 1 infection	K09228: KRAB domain-containing zinc finger protein	-		Bm12782	Y	WBGene00233043	Bma-let-391	BMA-TAG-146 [Source:UniProtKB/TrEMBL;Acc:A0A0J9Y515]	0	89.9	597		1854	1980	2066	1987	1938	2432	2206	2131	2289	2008	1875		2100.89	1932.54	2049.27	2141.84	2215.5	1959.65	2085.37	2013.27	2046.16	2052.28	2006.33		86.0985	79.2815	85.6695	88.4906	92.7631	82.6463	87.6535	85.2658
	BPAG_0000035001	1679	IPR013099: Potassium channel domain	-	-	-	-		Bm3794a	Y	WBGene00224055	Bma-twk-47	T-cell receptor beta chain ANA 11, putative [Source:UniProtKB/TrEMBL;Acc:A0A4E9FFM2]	3.7e-304	98.2	435		306	184	416	275	371	267	300	341	264	224	313		346.75	179.59	412.631	296.43	424.123	215.143	283.595	322.161	235.992	228.94	334.924		15.1076	7.83271	18.3391	13.0203	18.8792	9.64625	12.6728	14.5055
	BPAG_0000035101	1500	-	GO:0005783 - CC - endoplasmic reticulum; GO:0016853 - MF - isomerase activity; GO:0045454 - BP - cell redox homeostasis	03110: Chaperones and folding catalysts; 04131: Membrane trafficking; 04141: Protein processing in endoplasmic reticulum; 04147: Exosome; 04612: Antigen processing and presentation; 05163: Human cytomegalovirus infection; 05168: Herpes simplex virus 1 infection; 05169: Epstein-Barr virus infection; 05170: Human immunodeficiency virus 1 infection	K08056: protein disulfide isomerase family A, member 3	-		Bm4630	Y	WBGene00224891	Bma-pdi-3	-	0	98.4	499		8066	9569	9532	8433	9015	11980	10940	10169	11030	9337	8933		9140.14	9339.66	9454.81	9090.16	10305.8	9653.21	10341.8	9607.2	9859.84	9542.91	9558.7		445.75	455.953	470.356	446.918	513.493	484.466	517.283	484.191
	BPAG_0000035201	597	-	-	-	-	-		-	-	-	-	-	-	-	-		12	5	13	10	9	16	11	9	13	10	7		13.598	4.88016	12.8947	10.7793	10.2887	12.8924	10.3985	8.50278	11.6208	10.2205	7.4903		1.66622	0.598605	1.61177	1.33157	1.28804	1.62571	1.30683	1.07671
	BPAG_0000035301	5316	IPR000330: SNF2-related, N-terminal domain; IPR000953: Chromo/chromo shadow domain; IPR001650: Helicase, C-terminal; IPR014001: Helicase superfamily 1/2, ATP-binding domain; IPR016197: Chromo-like domain superfamily; IPR023779: Chromo domain, conserved site; IPR023780: Chromo domain; IPR025260: Domain of unknown function DUF4208; IPR027417: P-loop containing nucleoside triphosphate hydrolase; IPR…	GO:0005524 - MF - ATP binding	03021: Transcription machinery; 03036: Chromosome and associated proteins	K11367: chromodomain-helicase-DNA-binding protein 1	-		Bm4631a	Y	WBGene00224892	Bma-chd-1	BMA-CHD-1 [Source:UniProtKB/TrEMBL;Acc:A0A0H5SE81]	0	94.3	1852		1682	1982	2095	2027	2016	2742	2236	2189	2206	2293	2192		1905.99	1934.5	2078.03	2184.96	2304.67	2209.44	2113.73	2068.06	1971.97	2343.57	2345.53		26.228	26.6479	29.1698	30.3114	32.4015	31.2882	29.8324	29.4097
	BPAG_0000035401	1632	IPR000626: Ubiquitin domain; IPR006636: Heat shock chaperonin-binding; IPR009060: UBA-like superfamily; IPR015940: Ubiquitin-associated domain; IPR029071: Ubiquitin-like domain superfamily	GO:0005515 - MF - protein binding	03051: Proteasome; 04131: Membrane trafficking; 04141: Protein processing in endoplasmic reticulum	K04523: ubiquilin	-		Bm3390	Y	WBGene00223651	Bma-ubql-1	Bm3390 [Source:UniProtKB/TrEMBL;Acc:A0A0H5SDS3]	0	99.4	522		9581	11174	10778	10118	8817	12079	10667	10328	11649	9347	9197		10856.9	10906.2	10690.7	10906.5	10079.5	9732.98	10083.7	9757.41	10413.2	9553.13	9841.19		486.648	489.366	488.824	492.847	461.594	448.961	463.579	451.987
	BPAG_0000035501	210	-	-	-	-	-		-	-	-	-	-	-	-	-		1	2	1	0	1	0	1	0	1	0	0		1.13317	1.95207	0.991902	0	1.14319	0	0.945317	0	0.893911	0	0		0.394734	0.6807	0.352464	0	0.406856	0	0.33774	0
	BPAG_0000035601	3642	IPR000337: GPCR, family 3; IPR001828: Receptor, ligand binding region; IPR017978: GPCR family 3, C-terminal; IPR028082: Periplasmic binding protein-like I; IPR038550: GPCR, family 3, nine cysteines domain superfamily	GO:0004930 - MF - G-protein coupled receptor activity; GO:0007186 - BP - G-protein coupled receptor signaling pathway; GO:0016021 - CC - integral component of membrane	01009: Protein phosphatases and associated proteins; 04030: G protein-coupled receptors; 04072: Phospholipase D signaling pathway; 04080: Neuroactive ligand-receptor interaction; 04724: Glutamatergic synapse	K04608: metabotropic glutamate receptor 6/7/8	-		Bm6280a	Y	WBGene00226541	Bma-mgl-3	Metabotropic glutamate receptor type 2, putative [Source:UniProtKB/TrEMBL;Acc:A0A4E9ENP9]	0	96.3	1038		68	74	96	79	100	86	103	97	75	72	80		77.0555	72.2264	95.2226	85.1562	114.319	69.2968	97.3677	91.6411	67.0433	73.5878	85.6035		1.54772	1.45223	1.95104	1.72435	2.34596	1.43237	2.00585	1.90222
	BPAG_0000035701	2145	-	GO:0005328 - MF - neurotransmitter:sodium symporter activity; GO:0006836 - BP - neurotransmitter transport; GO:0016021 - CC - integral component of membrane	02000: Transporters	K05048: solute carrier family 6 (neurotransmitter transporter, amino acid/orphan) member 15/16/17/18/20	-		Bm6534	Y	WBGene00226795	Bm6534	Transporter [Source:UniProtKB/TrEMBL;Acc:A0A4E9EPP2]	0	97.8	714		156	172	162	172	125	199	183	178	200	133	173		176.774	167.878	160.688	185.403	142.899	160.35	172.993	168.166	178.782	135.933	185.117		6.02867	5.73121	5.59013	6.37439	4.979	5.62761	6.05098	5.92683
	BPAG_0000035801	861	IPR012936: Endoplasmic reticulum vesicle transporter, C-terminal	-	04131: Membrane trafficking	K20365: -	-		Bm7215a	Y	WBGene00227476	Bm7215	HT034, putative [Source:UniProtKB/TrEMBL;Acc:A0A4E9EQ27]	3.3e-212	99.7	286		280	309	373	247	290	342	441	292	427	258	322		317.287	301.594	369.979	266.248	331.525	275.576	416.885	275.868	381.7	263.69	344.554		26.9575	25.6508	32.0656	22.8051	28.7776	24.0947	36.3276	24.222
	BPAG_0000035901	234	-	-	-	-	-		-	-	-	-	-	-	-	-		0	0	0	0	0	0	0	1	0	0	0		0	0	0	0	0	0	0	0.944753	0	0	0		0	0	0	0	0	0	0	0.305221
	BPAG_0000036001	468	-	-	-	-	-		Bm5271	N	WBGene00225532	Bma-unc-7	Innexin [Source:UniProtKB/TrEMBL;Acc:A0A4E9ERG2]	4.3e-75	98.5	136		9	17	15	4	7	20	11	11	9	6	4		10.1985	16.5926	14.8785	4.31171	8.00232	16.1155	10.3985	10.3923	8.0452	6.13232	4.28017		1.59412	2.59626	2.37235	0.679441	1.27794	2.59228	1.66705	1.67871
	BPAG_0000036101	273	-	-	-	-	-		-	-	-	-	-	-	-	-		0	0	2	0	0	0	2	0	1	0	1		0	0	1.9838	0	0	0	1.89063	0	0.893911	0	1.07004		0	0	0.542252	0	0	0	0.5196	0
	BPAG_0000036201	1311	-	GO:0005921 - CC - gap junction	02000: Transporters	K22037: -	-		Bm5271	Y	WBGene00225532	Bma-unc-7	Innexin [Source:UniProtKB/TrEMBL;Acc:A0A4E9ERG2]	0	100	436		92	130	127	102	92	161	110	121	153	99	138		104.252	126.884	125.972	109.949	105.173	129.73	103.985	114.315	136.768	101.183	147.666		5.81714	7.08738	7.17027	6.18493	5.99577	7.4494	5.95102	6.59193
	BPAG_0000036301	1523	IPR009581: FAM20, C-terminal	-	04131: Membrane trafficking	K21958: -	-		Bm4617	Y	WBGene00224878	Bma-famk-1	Bm4617 [Source:UniProtKB/TrEMBL;Acc:A0A0H5S8Y0]	0	96.2	497		293	306	351	292	338	525	443	431	406	366	377		332.018	298.666	348.157	314.755	386.398	423.033	418.775	407.189	362.928	374.072	403.406		15.9475	14.3604	17.0585	15.2412	18.9617	20.9102	20.6303	20.2119
	BPAG_0000036401	1899	-	GO:0003924 - MF - GTPase activity; GO:0005509 - MF - calcium ion binding; GO:0005525 - MF - GTP binding; GO:0007005 - BP - mitochondrion organization; GO:0031307 - CC - integral component of mitochondrial outer membrane	03029: Mitochondrial biogenesis; 04031: GTP-binding proteins; 04137: Mitophagy - animal; 04214: Apoptosis - fly	K07870: Ras homolog gene family, member T1	-		Bm4933	Y	WBGene00225194	Bma-miro-1	Mitochondrial Rho GTPase [Source:UniProtKB/TrEMBL;Acc:A0A4E9EPX9]	0	99.2	632		2359	3013	2984	2753	2870	3833	3338	3249	3253	3124	2899		2673.14	2940.79	2959.83	2967.53	3280.95	3088.54	3155.47	3069.5	2907.89	3192.89	3102.06		102.974	113.402	116.308	115.244	129.127	122.437	124.67	122.195
	BPAG_0000036501	2226	IPR004166: MHCK/EF2 kinase; IPR011009: Protein kinase-like domain superfamily; IPR011990: Tetratricopeptide-like helical domain superfamily	GO:0004674 - MF - protein serine/threonine kinase activity; GO:0005515 - MF - protein binding; GO:0005524 - MF - ATP binding; GO:0006468 - BP - protein phosphorylation	01001: Protein kinases; 04152: AMPK signaling pathway; 04921: Oxytocin signaling pathway	K08292: elongation factor 2 kinase	-		Bm4019a	Y	WBGene00224280	Bma-efk-1	MHCK/EF2 kinase domain family protein [Source:UniProtKB/TrEMBL;Acc:A0A4E9ESW5]	0	98.4	741		1395	1620	1525	1529	1389	2089	1501	1860	1780	1683	1675		1580.77	1581.17	1512.65	1648.15	1587.89	1683.27	1418.92	1757.24	1591.16	1720.12	1792.32		51.9485	52.0157	50.7083	54.6034	53.3135	56.9261	47.8253	59.6784
	BPAG_0000036601	1710	-	-	-	-	-		Bm6547	Y	WBGene00226808	Bma-dyf-19	BMA-DYF-19 [Source:UniProtKB/TrEMBL;Acc:A0A0K0JNL8]	5.9e-276	99.3	557		115	148	175	121	146	142	118	128	123	154	138		130.314	144.453	173.583	130.429	166.906	114.42	111.547	120.928	109.951	157.396	147.666		5.57476	6.18601	7.57489	5.62505	7.29485	5.03721	4.89427	5.34618
	BPAG_0000036701	1059	IPR007110: Immunoglobulin-like domain; IPR013783: Immunoglobulin-like fold; IPR036179: Immunoglobulin-like domain superfamily	-	-	-	-		Bm10138a	Y	WBGene00230399	Bm10138	BMA-OIG-7 [Source:UniProtKB/TrEMBL;Acc:A0A5S6P6Z4]	4.6e-237	96.2	342		75	64	68	75	42	79	57	47	55	60	51		84.9876	62.4661	67.4493	80.8445	48.0139	63.6564	53.8831	44.4034	49.1651	61.3232	54.5722		5.8707	4.31945	4.75277	5.62993	3.38854	4.52511	3.81751	3.1698
	BPAG_0000036801	987	-	GO:0006811 - BP - ion transport; GO:0015075 - MF - ion transmembrane transporter activity; GO:0016020 - CC - membrane; GO:0055085 - BP - transmembrane transport	02000: Transporters; 03029: Mitochondrial biogenesis	K23500: -	-		Bm5553a	Y	WBGene00225814	Bma-sfxn-1.5	Sidoreflexin [Source:UniProtKB/TrEMBL;Acc:A0A5S6PQQ9]	4.6e-237	98.8	328		1280	1366	1366	1128	955	1411	1253	1264	1298	1005	985		1450.46	1333.26	1354.94	1215.9	1091.75	1136.95	1184.48	1194.17	1160.3	1027.16	1053.99		107.502	98.9187	102.44	90.8509	82.6696	86.7177	90.04	91.466
	BPAG_0000036901	1068	IPR000159: Ras-associating (RA) domain; IPR029071: Ubiquitin-like domain superfamily	GO:0007165 - BP - signal transduction	99995: Signaling proteins	K09855: Ras association domain-containing protein 7/8	-		Bm4824	Y	WBGene00225085	Bm4824	-	1.8e-230	92.3	364		713	905	914	807	873	1276	1090	1044	1077	1000	987		807.949	883.309	906.598	869.887	998.004	1028.17	1030.4	986.322	962.742	1022.05	1056.13		55.3404	60.5651	63.3445	60.0675	69.8398	72.4732	72.3864	69.8166
	BPAG_0000037001	381	-	-	-	-	-		Bm10137	Y	WBGene00230398	Bm10137	-	1.5e-47	68.3	126		118	168	137	101	115	144	110	118	84	118	98		133.714	163.973	135.891	108.871	131.467	116.032	103.985	111.481	75.0885	120.602	104.864		25.6733	31.5159	26.6152	21.0734	25.7889	22.9264	20.4771	22.1201
	BPAG_0000037101	3288	-	-	-	-	-		Bm1924a	Y	WBGene00222185	Bm1924	BMA-TAG-278, isoform c; BMA-TAG-278, isoform d [Source:UniProtKB/TrEMBL;Acc:A0A1P6BT71]	0	98.7	1074		1307	1969	1711	1482	1841	2698	1662	1898	1242	1852	1663		1481.05	1921.81	1697.14	1597.49	2104.61	2173.99	1571.12	1793.14	1110.24	1892.84	1779.48		32.951	42.8015	38.517	35.8306	47.839	49.7746	35.851	41.2282
	BPAG_0000037201	171	-	-	04147: Exosome; 04510: Focal adhesion; 04520: Adherens junction; 04670: Leukocyte transendothelial migration; 04810: Regulation of actin cytoskeleton; 04812: Cytoskeleton proteins; 05100: Bacterial invasion of epithelial cells; 05131: Shigellosis; 05146: Amoebiasis	K05700: vinculin	-		Bm7396a	N	WBGene00227657	Bma-deb-1	BMA-DEB-1; Vinculin [Source:UniProtKB/TrEMBL;Acc:A0A0K0JS71]	2e-07	95.2	21		51	77	70	48	61	72	78	60	79	61	81		57.7916	75.1545	69.4331	51.7405	69.7345	58.016	73.7347	56.6852	70.619	62.3453	86.6735		24.7228	32.184	30.2995	22.3143	30.4785	25.5408	32.3519	25.0602
	BPAG_0000037301	2937	-	GO:0007155 - BP - cell adhesion; GO:0051015 - MF - actin filament binding	04147: Exosome; 04510: Focal adhesion; 04520: Adherens junction; 04670: Leukocyte transendothelial migration; 04810: Regulation of actin cytoskeleton; 04812: Cytoskeleton proteins; 05100: Bacterial invasion of epithelial cells; 05131: Shigellosis; 05146: Amoebiasis	K05700: vinculin	-		Bm7396a	Y	WBGene00227657	Bma-deb-1	BMA-DEB-1; Vinculin [Source:UniProtKB/TrEMBL;Acc:A0A0K0JS71]	0	99.5	973		7308	8048	7489	6935	6404	8561	7495	6846	8192	6708	6668		8281.2	7855.11	7428.35	7475.42	7320.98	6898.26	7085.15	6467.78	7322.92	6855.93	7135.05		206.262	195.852	188.736	187.707	186.298	176.815	180.996	166.48
	BPAG_0000037401	366	-	GO:0006366 - BP - transcription from RNA polymerase II promoter; GO:0046982 - MF - protein heterodimerization activity	03021: Transcription machinery; 03022: Basal transcription factors	K03127: transcription initiation factor TFIID subunit 13	-		Bm2185	Y	WBGene00222446	Bma-taf-13	BMA-TAF-13 [Source:UniProtKB/TrEMBL;Acc:A0A0J9XTM7]	2.2e-70	100	121		1024	1193	1182	1014	850	1225	1102	1070	1082	958	1002		1160.36	1164.41	1172.43	1093.02	971.711	987.077	1041.74	1010.89	967.212	979.127	1072.18		231.923	232.972	239.04	220.239	198.426	203.027	213.551	208.801
	BPAG_0000037501	2202	-	GO:0003677 - MF - DNA binding; GO:0003721 - MF - telomeric template RNA reverse transcriptase activity; GO:0003964 - MF - RNA-directed DNA polymerase activity	03032: DNA replication proteins; 05165: Human papillomavirus infection; 05166: Human T-cell leukemia virus 1 infection; 05200: Pathways in cancer; 05225: Hepatocellular carcinoma; 05226: Gastric cancer	K11126: telomerase reverse transcriptase	-		Bm9653	Y	WBGene00229914	-	-	0	93.3	631		4448	5076	5242	4441	4557	6317	5554	5365	4721	5094	4704		5040.33	4954.34	5199.55	4787.07	5209.51	5090.09	5250.29	5068.6	4220.15	5206.34	5033.48		167.445	164.759	176.203	160.325	176.816	174.017	178.892	174.013
	BPAG_0000037601	1983	IPR005843: Alpha-D-phosphohexomutase, C-terminal; IPR005844: Alpha-D-phosphohexomutase, alpha/beta/alpha domain I; IPR016055: Alpha-D-phosphohexomutase, alpha/beta/alpha I/II/III; IPR016066: Alpha-D-phosphohexomutase, conserved site; IPR016657: Phosphoacetylglucosamine mutase; IPR036900: Alpha-D-phosphohexomutase, C-terminal domain superfamily	GO:0000287 - MF - magnesium ion binding; GO:0004610 - MF - phosphoacetylglucosamine mutase activity; GO:0005975 - BP - carbohydrate metabolic process; GO:0016868 - MF - intramolecular transferase activity, phosphotransferases; GO:0071704 - BP - organic substance metabolic process	00520: Amino sugar and nucleotide sugar metabolism	K01836: phosphoacetylglucosamine mutase	-		Bm13954a	Y	WBGene00234215	Bm13954	Phosphoacetylglucosamine mutase [Source:UniProtKB/TrEMBL;Acc:A0A4E9EVX7]	0	92.8	566		1962	2244	2262	2093	1912	2750	2328	2270	2293	2018	1993		2223.28	2190.22	2243.68	2256.1	2185.78	2215.89	2200.7	2144.59	2049.74	2062.5	2132.6		82.0164	80.8807	84.4314	83.9043	82.3806	84.1217	83.2649	81.7585
	BPAG_0000037701	1788	IPR001313: Pumilio RNA-binding repeat; IPR011989: Armadillo-like helical; IPR016024: Armadillo-type fold	GO:0003723 - MF - RNA binding; GO:0005488 - MF - binding	-	-	-		Bm9652	Y	WBGene00229913	Bm9652	Bm9652 [Source:UniProtKB/TrEMBL;Acc:A0A0H5S5I0]	0	97.6	595		2892	3434	3306	3170	2809	4149	3572	3399	3780	3437	3027		3277.12	3351.7	3279.23	3417.03	3211.22	3343.17	3376.67	3211.22	3378.98	3512.8	3239.02		134.077	137.271	136.858	140.938	134.228	140.758	141.692	135.773
	BPAG_0000037801	552	IPR001806: Small GTPase superfamily; IPR005225: Small GTP-binding protein domain; IPR020849: Small GTPase superfamily, Ras type; IPR027417: P-loop containing nucleoside triphosphate hydrolase	GO:0003924 - MF - GTPase activity; GO:0005525 - MF - GTP binding; GO:0007165 - BP - signal transduction; GO:0016020 - CC - membrane	01521: EGFR tyrosine kinase inhibitor resistance; 01522: Endocrine resistance; 04010: MAPK signaling pathway; 04012: ErbB signaling pathway; 04013: MAPK signaling pathway - fly; 04014: Ras signaling pathway; 04015: Rap1 signaling pathway; 04031: GTP-binding proteins; 04062: Chemokine signaling pathway; 04068: FoxO signaling pathway; 04071: Sphingolipid signaling pathway; 04072: Phospholipase D si…	K07827: GTPase KRas	-		Bm16898	Y	WBGene00249818	Bma-let-60	BMA-LET-60 [Source:UniProtKB/TrEMBL;Acc:A0A0K0J2J0]	3.3e-129	100	183		460	543	601	546	628	863	702	714	723	734	593		521.258	529.986	596.133	588.548	717.923	695.386	663.613	674.554	646.298	750.187	634.536		69.0785	70.3081	80.5879	78.6305	97.2032	94.8352	90.1986	92.3823
	BPAG_0000037901	1563	-	-	-	-	-		Bm2015a	Y	WBGene00222276	Bm2015	Bm2015 [Source:UniProtKB/TrEMBL;Acc:A0A0H5S600]	0	96.7	520		967	1224	1241	1004	996	1395	1242	1153	1172	1083	1018		1095.77	1194.66	1230.95	1082.24	1138.62	1124.06	1174.08	1089.3	1047.66	1106.88	1089.3		51.2852	55.9715	58.7688	51.0637	54.4453	54.1394	56.3591	52.6866
	BPAG_0000038001	5865	IPR001214: SET domain; IPR001965: Zinc finger, PHD-type; IPR011011: Zinc finger, FYVE/PHD-type; IPR013083: Zinc finger, RING/FYVE/PHD-type; IPR019786: Zinc finger, PHD-type, conserved site; IPR019787: Zinc finger, PHD-finger	GO:0005515 - MF - protein binding	00310: Lysine degradation; 03000: Transcription factors; 03036: Chromosome and associated proteins	K09189: histone-lysine N-methyltransferase MLL5	-		Bm3397	Y	WBGene00223658	Bm3397	SET domain-containing protein [Source:UniProtKB/TrEMBL;Acc:A0A5S6PK13]	0	89.9	1924		5351	6566	6552	6329	6449	8227	7263	6655	7458	6663	6696		6063.59	6408.63	6498.94	6822.2	7372.42	6629.13	6865.84	6287.33	6666.79	6809.94	7165.01		75.6295	80.0162	82.6875	85.7837	93.9473	85.0886	87.8314	81.0419
	BPAG_0000038101	2214	-	GO:0005515 - MF - protein binding; GO:0005634 - CC - nucleus	03009: Ribosome biogenesis	K14788: ribosome biogenesis protein ENP2	-		Bm13943	Y	WBGene00234204	Bma-nol-10	WD_REPEATS_REGION domain-containing protein [Source:UniProtKB/TrEMBL;Acc:A0A4E9EUN8]	0	95.1	712		2854	3335	3232	3144	2669	3938	3349	3190	2991	2911	2767		3234.06	3255.07	3205.83	3389	3051.17	3173.15	3165.87	3013.76	2673.69	2975.2	2960.81		106.856	107.662	108.051	112.887	102.998	107.894	107.285	102.907
	BPAG_0000038201	1473	-	GO:0005515 - MF - protein binding	-	-	-		Bm7550	Y	WBGene00227811	Bm7550	Bm7550 [Source:UniProtKB/TrEMBL;Acc:A0A0K0JSV1]	0	98.8	490		1577	1717	1803	1400	1206	1780	1629	1760	1734	1455	1407		1787.01	1675.85	1788.4	1509.1	1378.69	1434.28	1539.92	1662.77	1550.04	1487.09	1505.55		88.7469	83.3129	90.5998	75.5549	69.9527	73.3019	78.4368	85.3375
	BPAG_0000038301	531	-	-	-	-	-		-	-	-	-	-	-	-	-		12	29	26	21	15	24	23	29	29	28	20		13.598	28.3049	25.7894	22.6365	17.1478	19.3387	21.7423	27.3978	25.9234	28.6175	21.4009		1.87332	3.90345	3.62421	3.14385	2.41355	2.74167	3.0721	3.90062
	BPAG_0000038401	192	-	-	-	-	-		Bm3449a	N	WBGene00223710	Bm3449	Bm3449 [Source:UniProtKB/TrEMBL;Acc:A0A5S6PK63]	5.1e-28	100	48		68	75	78	59	41	81	90	46	66	54	55		77.0555	73.2024	77.3683	63.5977	46.8707	65.268	85.0785	43.4587	58.9981	55.1909	58.8524		29.3584	27.9193	30.0696	24.428	18.2449	25.5907	33.2463	17.1114
	BPAG_0000038501	921	IPR036028: SH3-like domain superfamily	GO:0005515 - MF - protein binding	-	-	-		Bm3449a	Y	WBGene00223710	Bm3449	Bm3449 [Source:UniProtKB/TrEMBL;Acc:A0A5S6PK63]	6.5e-186	87.2	304		456	495	518	418	418	574	533	426	543	396	454		516.725	483.136	513.805	450.573	477.853	462.516	503.854	402.465	485.394	404.733	485.8		41.0421	38.4141	41.6298	36.079	38.7772	37.8051	41.0459	33.0354
	BPAG_0000038601	2202	-	GO:0003723 - MF - RNA binding	05322: Systemic lupus erythematosus	K11089: 60 kDa SS-A/Ro ribonucleoprotein	-		Bm2162a	Y	WBGene00222423	Bma-rop-1	TROVE domain-containing protein [Source:UniProtKB/TrEMBL;Acc:A0A5S6PGU5]	0	96.3	711		2936	3335	3122	2976	2494	3848	3091	3171	3207	2590	2909		3326.98	3255.07	3096.72	3207.91	2851.11	3100.63	2921.98	2995.81	2866.77	2647.12	3112.76		110.526	108.249	104.942	107.437	96.7696	106.002	99.5597	102.851
	BPAG_0000038701	1719	-	GO:0005272 - MF - sodium channel activity; GO:0006814 - BP - sodium ion transport; GO:0016020 - CC - membrane	-	-	-		Bm6075a	Y	WBGene00226336	Bm6075	Bm6075 [Source:UniProtKB/TrEMBL;Acc:A0A5S6PRE5]	0	99	572		363	412	402	359	352	521	455	422	330	358	350		411.34	402.125	398.744	386.976	402.402	419.81	430.119	398.686	294.991	365.895	374.515		17.5047	17.1303	17.3095	16.6018	17.4955	18.3848	18.7732	17.5334
	BPAG_0000038801	1974	-	GO:0005272 - MF - sodium channel activity; GO:0006814 - BP - sodium ion transport; GO:0016020 - CC - membrane	04040: Ion channels; 04750: Inflammatory mediator regulation of TRP channels	K04832: acid-sensing ion channel 5	-		Bm2152	Y	WBGene00222413	Bm2152	BMA-FLR-1 [Source:UniProtKB/TrEMBL;Acc:A0A0H5SJ37]	0	87.6	685		1615	1807	1833	1573	1521	2062	1852	1927	1763	1600	1620		1830.07	1763.69	1818.16	1695.58	1738.79	1661.51	1750.73	1820.54	1575.96	1635.29	1733.47		67.8187	65.4268	68.7305	63.346	65.8327	63.3636	66.542	69.7211
	BPAG_0000038901	947	-	GO:0016021 - CC - integral component of membrane	02000: Transporters	K15382: solute carrier family 50 (sugar transporter)	-		Bm4758a	Y	WBGene00225019	Bm4758	Sugar transporter SWEET [Source:UniProtKB/TrEMBL;Acc:A0A4E9ESA3]	2.3e-198	91.8	317		20	30	36	24	22	38	35	52	45	27	25		22.6634	29.281	35.7085	25.8702	25.1502	30.6195	33.0861	49.1272	40.226	27.5954	26.7511		1.75067	2.26421	2.81376	2.01465	1.98487	2.43406	2.62132	3.92178
	BPAG_0000039001	678	-	-	03036: Chromosome and associated proteins	K11269: chromosome transmission fidelity protein 18	-		Bm4925a	N	WBGene00225186	Bma-ctf-18	Bm4925 [Source:UniProtKB/TrEMBL;Acc:A0A5S6PNS9]	1.1e-131	86.6	246		667	784	803	679	610	880	769	747	797	785	661		755.823	765.21	796.497	731.912	697.345	709.084	726.949	705.731	712.447	802.312	707.299		81.5493	82.6478	87.6638	79.6118	76.8705	78.732	80.4449	78.6902
	BPAG_0000039101	1065	IPR002815: Spo11/DNA topoisomerase VI subunit A; IPR013048: Meiotic recombination, Spo11; IPR013049: Spo11/DNA topoisomerase VI, subunit A, N-terminal; IPR034136: Topoisomerase 6 subunit A/Spo11, TOPRIM domain; IPR036078: Spo11/DNA topoisomerase VI subunit A superfamily	GO:0000737 - BP - DNA catabolic process, endonucleolytic; GO:0003677 - MF - DNA binding; GO:0003824 - MF - catalytic activity; GO:0005524 - MF - ATP binding; GO:0005694 - CC - chromosome; GO:0006259 - BP - DNA metabolic process	03400: DNA repair and recombination proteins; 04113: Meiosis - yeast	K10878: meiotic recombination protein SPO11	-		Bm5585a	Y	WBGene00225846	Bma-spo-11	BMA-SPO-11, isoform c [Source:UniProtKB/TrEMBL;Acc:A0A5S6PQY6]	3.4e-252	98.6	351		654	784	790	665	604	913	816	807	959	1014	733		741.092	765.21	783.602	716.821	690.486	735.675	771.379	762.416	857.261	1036.36	784.342		50.9041	52.6152	54.905	49.6375	48.456	52.0019	54.3428	54.1195
	BPAG_0000039201	480	-	-	-	-	-		Bm3165a	Y	WBGene00223426	Bm3165	Bm3165 [Source:UniProtKB/TrEMBL;Acc:A0A5S6PJK1]	1.6e-98	88.1	159		158	141	148	158	135	183	152	181	236	165	164		179.041	137.621	146.801	170.312	154.33	147.457	143.688	171	210.963	168.639	175.487		27.286	20.9953	22.8221	26.167	24.0299	23.1264	22.4597	26.9319
	BPAG_0000039301	432	-	-	-	-	-		Bm6991a	Y	WBGene00227252	Bm6991	Pyridoxal-dependent decarboxylase conserved domain containing protein [Source:UniProtKB/TrEMBL;Acc:A0A4E9ETM0]	2.9e-83	97.2	143		176	222	180	198	178	268	221	244	241	207	183		199.438	216.679	178.542	213.429	203.488	215.948	208.915	230.52	215.433	211.565	195.818		33.7717	36.7294	30.8406	36.435	35.2043	37.6313	36.2836	40.34
	BPAG_0000039401	216	-	-	-	-	-		-	-	-	-	-	-	-	-		27	41	45	52	42	60	43	60	87	67	58		30.5956	40.0173	44.6356	56.0522	48.0139	48.3466	40.6486	56.6852	77.7703	68.4776	62.0625		10.3618	13.5667	15.4203	19.1376	16.6133	16.8498	14.1194	19.8393
	BPAG_0000039501	1713	IPR002129: Pyridoxal phosphate-dependent decarboxylase; IPR015421: Pyridoxal phosphate-dependent transferase, major domain; IPR015422: Pyridoxal phosphate-dependent transferase domain 1; IPR015424: Pyridoxal phosphate-dependent transferase	GO:0003824 - MF - catalytic activity; GO:0016831 - MF - carboxy-lyase activity; GO:0019752 - BP - carboxylic acid metabolic process; GO:0030170 - MF - pyridoxal phosphate binding	00600: Sphingolipid metabolism; 04071: Sphingolipid signaling pathway	K01634: sphinganine-1-phosphate aldolase	-		Bm18217	Y	WBGene00269366	Bma-spl-3	-	0	100	570		1153	1455	1345	1249	1343	1943	1576	1564	1770	1432	1397		1306.54	1420.13	1334.11	1346.33	1535.3	1565.63	1489.82	1477.59	1582.22	1463.58	1494.85		55.7951	60.7086	58.1165	57.9619	66.9851	68.804	65.253	65.2092
	BPAG_0000039601	4086	IPR007187: Nucleoporin, Nup133/Nup155-like, C-terminal; IPR014908: Nucleoporin, Nup133/Nup155-like, N-terminal	-	03013: RNA transport; 03019: Messenger RNA biogenesis	K14312: nuclear pore complex protein Nup155	-		Bm6518a	Y	WBGene00226779	Bma-npp-8	BMA-NPP-8 [Source:UniProtKB/TrEMBL;Acc:A0A0K0JNH1]	0	98	1335		2001	2246	2426	2306	2498	3500	3017	3017	2953	2693	2654		2267.47	2192.17	2406.35	2485.7	2855.69	2820.22	2852.02	2850.32	2639.72	2752.39	2839.89		40.595	39.2877	43.9467	44.864	52.2341	51.9598	52.3695	52.7359
	BPAG_0000039701	930	IPR004254: AdipoR/Haemolysin-III-related	GO:0016021 - CC - integral component of membrane	-	-	-		Bm6994	Y	WBGene00227255	Bma-paqr-3	Haemolysin-III related family protein [Source:UniProtKB/TrEMBL;Acc:A0A4E9ETJ2]	8.2e-238	99.4	309		133	166	141	145	131	183	160	158	154	146	123		150.711	162.021	139.858	156.299	149.758	147.457	151.251	149.271	137.662	149.22	131.615		11.8548	12.7576	11.222	12.3943	12.0351	11.9362	12.2022	12.134
	BPAG_0000039801	1017	IPR006911: Armadillo repeat-containing domain; IPR011989: Armadillo-like helical; IPR016024: Armadillo-type fold	GO:0005488 - MF - binding	-	-	-		Bm6993	Y	WBGene00227254	Bm6993	Arm_2 domain-containing protein [Source:UniProtKB/TrEMBL;Acc:A0A4E9EUM0]	3e-230	99.1	328		571	555	597	479	504	599	584	548	635	556	519		647.039	541.698	592.165	516.327	576.167	482.661	552.065	517.725	567.633	568.262	555.352		46.5414	39.0047	43.4498	37.4414	42.3418	35.7276	40.7281	38.4848
	BPAG_0000039901	1479	-	GO:0008289 - MF - lipid binding	-	-	-		Bm2960	Y	WBGene00223221	Bma-perm-5	BMA-PERM-5, isoform a [Source:UniProtKB/TrEMBL;Acc:A0A0K0J877]	0	98.2	492		1423	1564	1573	1357	1208	1839	1542	1522	1591	1369	1360		1612.5	1526.51	1560.26	1462.75	1380.97	1481.82	1457.68	1437.91	1422.21	1399.19	1455.26		79.7556	75.5811	78.7218	72.9372	69.7844	75.4244	73.9466	73.4981
	BPAG_0000040001	1686	-	GO:0008289 - MF - lipid binding	-	-	-		Bm2959a	Y	WBGene00223220	Bm2959	Bm2959 [Source:UniProtKB/TrEMBL;Acc:A0A5S6PIZ8]	0	96.1	565		1203	1385	1348	1130	1264	1727	1405	1383	1226	1243	1164		1363.2	1351.81	1337.08	1218.06	1444.99	1391.58	1328.17	1306.59	1095.93	1270.41	1245.53		59.1469	58.7134	59.1789	53.2793	64.0544	62.1345	59.1045	58.5861
	BPAG_0000040101	867	-	-	03008: Ribosome biogenesis in eukaryotes; 03009: Ribosome biogenesis	K14561: U3 small nucleolar ribonucleoprotein protein IMP4	-		Bm13982a	Y	WBGene00234243	Bm13982	Bm13982 [Source:UniProtKB/TrEMBL;Acc:A0A5S6PB23]	1.7e-209	97.3	292		1125	1243	1157	1142	922	1283	1090	1135	1229	1070	967		1274.81	1213.21	1147.63	1230.99	1054.02	1033.81	1030.4	1072.3	1098.62	1093.6	1034.73		107.562	102.47	98.7753	104.709	90.8598	89.7647	89.168	93.4989
	BPAG_0000040201	1851	-	GO:0005515 - MF - protein binding; GO:0007165 - BP - signal transduction	-	-	-		Bm1952	Y	WBGene00222213	Bma-ikb-1	Death domain containing protein [Source:UniProtKB/TrEMBL;Acc:A0A4E9EX17]	0	99	521		1146	1249	1225	1065	926	1379	1219	1207	1226	1094	1007		1298.61	1219.06	1215.08	1147.99	1058.59	1111.17	1152.34	1140.32	1095.93	1118.13	1077.53		51.3219	48.2282	48.9851	45.7384	42.7429	45.1914	46.7088	46.5726
	BPAG_0000040301	1908	-	-	-	-	-		Bm2281	Y	WBGene00222542	Bm2281	Bm2281 [Source:UniProtKB/TrEMBL;Acc:A0A0H5S3S0]	0	93.1	635		1685	1914	1917	1792	1696	2416	2032	2172	2092	1740	1782		1909.39	1868.13	1901.48	1931.64	1938.85	1946.76	1920.88	2052	1870.06	1778.37	1906.82		73.2058	71.6982	74.3666	74.6616	75.9464	76.8098	75.5348	81.3039
	BPAG_0000040401	945	IPR001925: Porin, eukaryotic type; IPR023614: Porin domain superfamily; IPR027246: Eukaryotic porin/Tom40	GO:0005741 - CC - mitochondrial outer membrane; GO:0008308 - MF - voltage-gated anion channel activity; GO:0055085 - BP - transmembrane transport; GO:0098656 - BP - anion transmembrane transport	03029: Mitochondrial biogenesis; 04020: Calcium signaling pathway; 04022: cGMP-PKG signaling pathway; 04040: Ion channels; 04216: Ferroptosis; 04217: Necroptosis; 04218: Cellular senescence; 04621: NOD-like receptor signaling pathway; 04979: Cholesterol metabolism; 05012: Parkinson disease; 05016: Huntington disease; 05166: Human T-cell leukemia virus 1 infection	K15040: voltage-dependent anion channel protein 2	-		Bm5232	Y	WBGene00225493	Bma-vdac-1	Probable voltage-dependent anion-selective channel, putative [Source:UniProtKB/TrEMBL;Acc:A0A4E9ETX3]	1.3e-211	92.8	306		4842	5408	5217	4774	4147	5806	5029	5171	5867	4706	4395		5486.8	5278.38	5174.75	5146.02	4740.8	4678.34	4754	4885.32	5244.58	4809.78	4702.84		424.734	409.025	408.623	401.595	374.94	372.686	377.443	390.816
	BPAG_0000040501	774	IPR001999: Osteonectin-like, conserved site; IPR002350: Kazal domain; IPR003645: Follistatin-like, N-terminal; IPR011992: EF-hand domain pair; IPR015369: Follistatin/Osteonectin EGF domain; IPR018247: EF-Hand 1, calcium-binding site; IPR019577: SPARC/Testican, calcium-binding domain; IPR036058: Kazal domain superfamily	GO:0005509 - MF - calcium ion binding; GO:0005515 - MF - protein binding; GO:0005578 - CC - proteinaceous extracellular matrix; GO:0005615 - CC - extracellular space; GO:0007165 - BP - signal transduction	-	-	-		Bm2749	Y	WBGene00223010	Bma-ost-1	SPARC, putative [Source:UniProtKB/TrEMBL;Acc:A0A4E9ETI1]	2e-189	98	246		214	181	159	251	156	257	174	200	214	165	154		242.498	176.662	157.712	270.56	178.337	207.085	164.485	188.951	191.297	168.639	164.787		22.9191	16.7141	15.2051	25.7792	17.2204	20.1414	15.9445	18.4552
	BPAG_0000040601	1695	-	GO:0005921 - CC - gap junction	02000: Transporters	K22037: -	-		Bm2315a	Y	WBGene00222576	Bma-inx-18	Innexin [Source:UniProtKB/TrEMBL;Acc:A0A4E9EVU5]	0	99.1	453		65	76	91	67	47	98	66	83	98	62	56		73.656	74.1785	90.2631	72.2211	53.7299	78.9662	62.3909	78.4145	87.6033	63.3673	59.9224		3.17883	3.20471	3.9738	3.14226	2.36912	3.50715	2.7617	3.49734
	BPAG_0000040701	2376	IPR000008: C2 domain; IPR000909: Phosphatidylinositol-specific phospholipase C, X domain; IPR001192: Phosphoinositide phospholipase C family; IPR001711: Phospholipase C, phosphatidylinositol-specific, Y domain; IPR002048: EF-hand domain; IPR011992: EF-hand domain pair; IPR011993: PH-like domain superfamily; IPR017946: PLC-like phosphodiesterase, TIM beta/alpha-barrel domain superfamily; IPR018247…	GO:0004435 - MF - phosphatidylinositol phospholipase C activity; GO:0005509 - MF - calcium ion binding; GO:0006629 - BP - lipid metabolic process; GO:0007165 - BP - signal transduction; GO:0008081 - MF - phosphoric diester hydrolase activity; GO:0035556 - BP - intracellular signal transduction	00562: Inositol phosphate metabolism; 04020: Calcium signaling pathway; 04070: Phosphatidylinositol signaling system; 04131: Membrane trafficking; 04919: Thyroid hormone signaling pathway; 04933: AGE-RAGE signaling pathway in diabetic complications; 05131: Shigellosis	K05857: phosphatidylinositol phospholipase C, delta	-		Bm5233	Y	WBGene00225494	Bma-plc-4.2	Phosphoinositide phospholipase C [Source:UniProtKB/TrEMBL;Acc:A0A4E9EY82]	0	95.2	766		1122	1339	1331	1122	971	1592	1321	1225	1066	1049	1113		1271.42	1306.91	1320.22	1209.43	1110.04	1282.8	1248.76	1157.32	952.909	1072.13	1190.96		39.1445	40.279	41.4635	37.5391	34.9167	40.6438	39.4328	36.823
	BPAG_0000040801	1803	-	GO:0003677 - MF - DNA binding	03110: Chaperones and folding catalysts	K09522: DnaJ homolog subfamily C member 2	-		Bm3904a	Y	WBGene00224165	Bma-dnj-11	DnaJ domain containing protein [Source:UniProtKB/TrEMBL;Acc:A0A4E9EUP6]	0	99	576		1676	1811	1801	1711	1532	2304	1834	1839	1699	1775	1642		1899.19	1767.59	1786.41	1844.33	1751.37	1856.51	1733.71	1737.4	1518.75	1814.14	1757.01		77.0553	71.7906	73.9354	75.4383	72.5977	77.5148	72.1449	72.8477
	BPAG_0000040901	1977	IPR009075: Acyl-CoA dehydrogenase/oxidase C-terminal; IPR009100: Acyl-CoA dehydrogenase/oxidase, N-terminal and middle domain superfamily; IPR013786: Acyl-CoA dehydrogenase/oxidase, N-terminal; IPR036250: Acyl-CoA dehydrogenase-like, C-terminal; IPR037069: Acyl-CoA dehydrogenase/oxidase, N-terminal domain superfamily	GO:0008152 - BP - metabolic process; GO:0016627 - MF - oxidoreductase activity, acting on the CH-CH group of donors; GO:0050660 - MF - flavin adenine dinucleotide binding; GO:0055114 - BP - oxidation-reduction process	-	-	-		Bm2447a	Y	WBGene00222708	Bma-acdh-13	Gex interacting protein protein 9, isoform a, putative [Source:UniProtKB/TrEMBL;Acc:A0A4E9ETK2]	0	97.3	625		1244	1444	1365	1331	1051	1651	1428	1512	1254	1284	1176		1409.66	1409.39	1353.95	1434.72	1201.49	1330.34	1349.91	1428.47	1120.96	1312.32	1258.37		52.16	52.2042	51.1046	53.5191	45.4209	50.6569	51.2299	54.6229
	BPAG_0000041001	831	IPR007727: Spo12	-	-	-	-		Bm9163a	Y	WBGene00229424	Bm9163	Bm9163, isoform a [Source:UniProtKB/TrEMBL;Acc:A0A0J9XPQ2]	9.7e-168	96.7	276		2507	2929	2491	2663	2089	3036	2746	2716	3243	2616	2293		2840.85	2858.8	2470.83	2870.52	2388.12	2446.34	2595.84	2565.95	2898.95	2673.69	2453.61		250.079	251.92	221.874	254.746	214.782	221.615	234.37	233.431
	BPAG_0000041101	1152	-	-	-	-	-		Bm9164a	Y	WBGene00229425	Bm9164	Bm9164 [Source:UniProtKB/TrEMBL;Acc:A0A5S6PX14]	1.4e-255	98.2	383		2034	2384	2389	2261	2005	2869	2383	2425	2288	2306	2087		2304.86	2326.86	2369.65	2437.19	2292.09	2311.77	2252.69	2291.03	2045.27	2356.86	2233.18		146.36	147.91	153.496	156.022	148.704	151.069	146.715	150.345
	BPAG_0000041201	645	-	-	-	-	-		Bm4235	Y	WBGene00224496	Bm4235	Phosphatidate cytidylyltransferase, putative [Source:UniProtKB/TrEMBL;Acc:A0A4E9ETI3]	4e-102	99.3	144		2	2	2	2	2	1	0	3	2	4	0		2.26634	1.95207	1.9838	2.15585	2.28638	0.805777	0	2.83426	1.78782	4.08821	0		0.257036	0.221623	0.229512	0.246495	0.264929	0.0940456	0	0.332194
	BPAG_0000041301	801	-	-	-	-	-		Bm9166	Y	WBGene00229427	Bm9166	Bm9166 [Source:UniProtKB/TrEMBL;Acc:A0A0J9XPQ7]	4.9e-168	93.3	255		1006	1121	1213	1041	1013	1540	1228	1210	1343	1128	1078		1139.97	1094.13	1203.18	1122.12	1158.05	1240.9	1160.85	1143.15	1200.52	1152.88	1153.51		104.109	100.027	112.089	103.313	108.053	116.624	108.735	107.89
	BPAG_0000041401	2727	IPR000203: GPS motif; IPR000832: GPCR, family 2, secretin-like; IPR017981: GPCR, family 2-like; IPR036445: GPCR family 2, extracellular hormone receptor domain superfamily	GO:0004888 - MF - transmembrane signaling receptor activity; GO:0004930 - MF - G-protein coupled receptor activity; GO:0007166 - BP - cell surface receptor signaling pathway; GO:0007186 - BP - G-protein coupled receptor signaling pathway; GO:0016020 - CC - membrane; GO:0016021 - CC - integral component of membrane	01002: Peptidases and inhibitors; 04030: G protein-coupled receptors	K04594: latrophilin 3	P02A		Bm1739a	Y	WBGene00222000	Bma-lat-2	-	0	93.4	879		600	614	578	606	507	850	637	749	779	677	554		679.901	599.284	573.319	653.224	579.597	684.911	602.167	707.62	696.357	691.93	592.804		18.2386	16.0927	15.6883	17.6655	15.8848	18.9074	16.5675	19.6167
	BPAG_0000041501	1065	-	-	-	-	-		Bm1739a	N	WBGene00222000	Bma-lat-2	-	1.5e-39	80	90		66	63	25	54	29	92	32	79	99	80	52		74.7891	61.4901	24.7975	58.208	33.1525	74.1315	30.2501	74.6355	88.4972	81.7643	55.6422		5.13711	4.22801	1.7375	4.03071	2.32653	5.24006	2.13109	5.29794
	BPAG_0000041601	315	IPR016187: C-type lectin fold	-	-	-	-		-	-	-	-	-	-	-	-		12	10	6	16	13	19	9	18	21	27	16		13.598	9.76033	5.95141	17.2468	14.8615	15.3098	8.50785	17.0056	18.7721	27.5954	17.1207		3.15787	2.269	1.40986	4.03782	3.52608	3.65882	2.02644	4.08124
	BPAG_0000041701	342	-	-	-	-	-		-	-	-	-	-	-	-	-		313	357	346	308	287	365	328	321	359	281	301		354.682	348.444	343.198	332.001	328.095	294.109	310.064	303.266	320.914	287.197	322.083		75.8652	74.6083	74.8832	71.5916	71.6994	64.7388	68.022	67.0361
	BPAG_0000041801	1281	-	GO:0003676 - MF - nucleic acid binding; GO:0003723 - MF - RNA binding	03019: Messenger RNA biogenesis; 03041: Spliceosome	K13208: ELAV like protein 2/3/4	-		Bm3850	Y	WBGene00224111	Bma-exc-7	BMA-EXC-7 [Source:UniProtKB/TrEMBL;Acc:A0A0K0JC44]	1.1e-287	96.9	426		552	592	601	573	500	681	595	600	598	465	516		625.509	577.811	596.133	617.652	571.594	548.734	562.464	566.852	534.559	475.255	552.142		35.7202	33.0307	34.7264	35.5585	33.3488	32.2475	32.9435	33.4528
	BPAG_0000041901	561	-	-	-	-	-		-	-	-	-	-	-	-	-		36	52	53	43	42	63	49	58	59	60	38		40.7941	50.7537	52.5708	46.3508	48.0139	50.764	46.3205	54.7957	52.7407	61.3232	40.6616		5.31941	6.62499	6.99274	6.09317	6.39656	6.81202	6.19491	7.38405
	BPAG_0000042001	903	IPR008699: NADH dehydrogenase [ubiquinone] 1 beta subcomplex subunit 8	GO:0003954 - MF - NADH dehydrogenase activity; GO:0005739 - CC - mitochondrion; GO:0008137 - MF - NADH dehydrogenase (ubiquinone) activity	00190: Oxidative phosphorylation; 04714: Thermogenesis; 04723: Retrograde endocannabinoid signaling; 04932: Non-alcoholic fatty liver disease (NAFLD); 05010: Alzheimer disease; 05012: Parkinson disease; 05016: Huntington disease	K03964: NADH dehydrogenase (ubiquinone) 1 beta subcomplex subunit 8	-		Bm6724	Y	WBGene00226985	Bm6724	-	3.3e-104	68.4	237		2698	2972	3014	2534	2180	3130	2635	2658	2948	2178	2195		3057.29	2900.77	2989.59	2731.47	2492.15	2522.08	2490.91	2511.15	2635.25	2226.03	2348.74		247.673	235.237	247.053	223.078	206.266	210.259	206.964	210.231
	BPAG_0000042101	1302	-	-	03036: Chromosome and associated proteins	K11319: inhibitor of growth protein 3	-		Bm10083	Y	WBGene00230344	Bma-ing-3	Inhibitor of growth protein [Source:UniProtKB/TrEMBL;Acc:A0A0K0IM05]	1.4e-282	91	435		1123	1414	1340	1167	1185	1569	1309	1275	1290	1275	1184		1272.55	1380.11	1329.15	1257.94	1354.68	1264.26	1237.42	1204.56	1153.15	1303.12	1266.93		71.4979	77.6217	76.1777	71.252	77.762	73.0988	71.3067	69.9405
	BPAG_0000042201	555	-	-	-	-	-		Bm731a	Y	WBGene00220992	Bm731	-	4.4e-122	97.2	177		147	175	137	142	111	185	161	151	173	169	137		166.576	170.806	135.891	153.066	126.894	149.069	152.196	142.658	154.647	172.727	146.596		21.9558	22.5367	18.271	20.3392	17.0879	20.2198	20.5748	19.4318
	BPAG_0000042301	918	IPR001045: Spermidine/spermine synthases; IPR029063: S-adenosyl-L-methionine-dependent methyltransferase; IPR030373: Polyamine biosynthesis domain, conserved site; IPR030374: Polyamine biosynthesis domain; IPR030668: Spermidine/spermine synthase, eukaryotes; IPR035246: Spermidine synthase, tetramerisation domain; IPR037163: Spermidine synthase, tetramerisation domain superfamily	GO:0003824 - MF - catalytic activity; GO:0006595 - BP - polyamine metabolic process	00270: Cysteine and methionine metabolism; 00330: Arginine and proline metabolism; 00480: Glutathione metabolism	K00797: spermidine synthase	-		Bm13871a	Y	WBGene00234132	Bma-spds-1	BMA-SPDS-1 [Source:UniProtKB/TrEMBL;Acc:A0A5S6PAT3]	5.1e-208	97.9	286		2036	2507	2450	2268	2068	3009	2630	2531	2479	2074	2173		2307.13	2446.91	2430.16	2444.74	2364.11	2424.58	2486.18	2391.17	2216.01	2119.74	2325.2		183.848	195.19	197.541	196.398	192.472	198.828	203.196	196.915
	BPAG_0000042401	1854	IPR006020: PTB/PI domain; IPR011993: PH-like domain superfamily	GO:0005515 - MF - protein binding	04131: Membrane trafficking; 04144: Endocytosis	K12475: disabled homolog 2	-		Bm5136a	Y	WBGene00225397	Bma-dab-1	PID domain-containing protein [Source:UniProtKB/TrEMBL;Acc:A0A5S6PPH4]	0	97.9	535		3297	3814	4159	3710	3705	5451	4650	4479	5497	4640	4263		3736.06	3722.59	4125.32	3999.11	4235.51	4392.29	4395.72	4231.55	4913.83	4742.33	4561.59		147.412	147.033	166.04	159.075	170.741	178.346	177.887	172.544
	BPAG_0000042501	486	-	-	-	-	-		-	-	-	-	-	-	-	-		3	2	5	6	8	6	4	1	4	3	2		3.39951	1.95207	4.95951	6.46756	9.14551	4.83466	3.78127	0.944753	3.57564	3.06616	2.14009		0.511693	0.294129	0.761497	0.981414	1.40642	0.748881	0.583748	0.146958
	BPAG_0000042601	321	-	-	-	-	-		-	-	-	-	-	-	-	-		0	0	0	0	0	0	2	0	1	0	1		0	0	0	0	0	0	1.89063	0	0.893911	0	1.07004		0	0	0	0	0	0	0.441903	0
	BPAG_0000042701	3603	-	GO:0005515 - MF - protein binding	04724: Glutamatergic synapse	K15009: SH3 and multiple ankyrin repeat domains protein	-		Bm2531a	Y	WBGene00222792	Bma-shn-1	BMA-SHN-1 [Source:UniProtKB/TrEMBL;Acc:A0A5S6PHN0]	0	88.6	1219		1961	2279	2127	1868	2109	2763	2404	2286	2302	1848	1772		2222.14	2224.38	2109.77	2013.57	2410.99	2226.36	2272.54	2159.71	2057.78	1888.75	1896.12		45.1167	45.209	43.6956	41.2145	50.0118	46.5173	47.323	45.315
	BPAG_0000042801	468	IPR002602: Domain of unknown function DB	-	-	-	-		Bm10086	Y	WBGene00230347	Bm10086	DB domain-containing protein [Source:UniProtKB/TrEMBL;Acc:A0A4E9FBJ7]	1.6e-121	99.3	152		355	375	447	330	325	386	346	310	373	269	260		402.275	366.012	443.38	355.716	371.536	311.03	327.08	292.874	333.429	274.932	278.211		62.8792	57.2704	70.6962	56.0539	59.3331	50.031	52.4363	47.3092
	BPAG_0000042901	1503	-	GO:0005515 - MF - protein binding	03036: Chromosome and associated proteins	K11291: nuclear autoantigenic sperm protein	-		Bm2122a	Y	WBGene00222383	Bm2122	Bm2122 [Source:UniProtKB/TrEMBL;Acc:A0A0I9R2Z5]	1.7e-271	92.8	501		2446	2696	2589	2534	2301	3390	2694	2878	2147	2543	2368		2771.73	2631.38	2568.03	2731.47	2630.48	2731.58	2546.68	2719	1919.23	2599.08	2533.86		134.903	128.205	127.499	134.025	130.803	136.817	127.128	136.761
	BPAG_0000043001	449	-	-	-	-	-		Bm10087	Y	WBGene00230348	Bm10087	-	4e-80	89	145		94	114	91	78	102	148	121	103	78	92	82		106.518	111.268	90.2631	84.0783	116.605	119.255	114.383	97.3096	69.7251	94.0289	87.7435		17.3542	18.1469	15.0013	13.8097	19.4095	19.9946	19.1135	16.384
	BPAG_0000043101	1032	-	GO:0016757 - MF - transferase activity, transferring glycosyl groups	00600: Sphingolipid metabolism; 01003: Glycosyltransferases	K00720: ceramide glucosyltransferase	-		Bm4607a	Y	WBGene00224868	Bm4607	-	6.5e-218	86.6	343		1631	1839	1737	1518	1370	1920	1734	1588	1828	1507	1561		1848.2	1794.92	1722.93	1636.29	1566.17	1547.09	1639.18	1500.27	1634.07	1540.23	1670.34		131.008	127.364	124.582	116.931	113.423	112.855	119.171	109.901
	BPAG_0000043201	4932	-	GO:0008237 - MF - metallopeptidase activity; GO:0008270 - MF - zinc ion binding	-	-	M01		Bm7005	Y	WBGene00227266	Bm7005	Peptidase_M1 domain-containing protein [Source:UniProtKB/TrEMBL;Acc:A0A4E9ESJ4]	0	97.7	1151		2927	3446	3455	3107	2995	4329	3840	3472	3757	3082	3142		3316.78	3363.41	3427.02	3349.12	3423.85	3488.21	3630.02	3280.18	3358.42	3149.97	3362.08		49.1953	49.9387	51.8512	50.079	51.884	53.243	55.2217	50.279
	BPAG_0000043301	957	-	GO:0055085 - BP - transmembrane transport	02000: Transporters	K15107: solute carrier family 25 (mitochondrial glutamate transporter), member 18/22	-		Bm3466	Y	WBGene00223727	Bma-slc-25A18.1	Bm3466 [Source:UniProtKB/TrEMBL;Acc:A0A0K0JAD6]	1.7e-230	98.1	317		1900	2150	2085	1715	1587	2306	2001	1955	2079	1784	1736		2153.02	2098.47	2068.11	1848.64	1814.24	1858.12	1891.58	1846.99	1858.44	1823.34	1857.6		164.576	160.573	161.261	142.459	141.685	146.166	148.299	145.903
	BPAG_0000043401	1257	IPR004843: Calcineurin-like phosphoesterase domain, ApaH type; IPR029052: Metallo-dependent phosphatase-like	GO:0016787 - MF - hydrolase activity	-	-	-		Bm3955a	Y	WBGene00224216	Bm3955	Metallophos domain-containing protein [Source:UniProtKB/TrEMBL;Acc:A0A4E9ET28]	1.6e-250	97.8	361		1299	1617	1588	1447	1267	1959	1636	1701	1881	1546	1481		1471.99	1578.24	1575.14	1559.76	1448.42	1578.52	1546.54	1607.03	1681.45	1580.09	1584.73		85.664	91.9432	93.5081	91.5105	86.1194	94.536	92.3102	96.6493
	BPAG_0000043501	1044	IPR000555: JAB1/MPN/MOV34 metalloenzyme domain; IPR015063: USP8 dimerisation domain; IPR037518: MPN domain	GO:0005515 - MF - protein binding	01002: Peptidases and inhibitors; 04121: Ubiquitin system; 04131: Membrane trafficking; 04144: Endocytosis	K11866: STAM-binding protein	M67C		Bm9636	Y	WBGene00229897	Bm9636	MPN domain-containing protein [Source:UniProtKB/TrEMBL;Acc:A0A4E9EW68]	1.1e-240	96.8	347		978	1164	1157	1029	954	1334	1177	1173	1493	1237	1141		1108.24	1136.1	1147.63	1109.19	1090.6	1074.91	1112.64	1108.2	1334.61	1264.28	1220.92		77.6538	79.6888	82.0289	78.3524	78.0742	77.5092	79.9609	80.2467
	BPAG_0000043601	2745	-	-	-	-	-		Bm6903a	Y	WBGene00227164	Bm6903	LIM zinc-binding domain-containing protein [Source:UniProtKB/TrEMBL;Acc:A0A4E9EUI1]	0	96.9	800		1974	2220	1931	1922	1849	2615	2034	2121	1717	1935	1746		2236.87	2166.79	1915.36	2071.78	2113.76	2107.11	1922.78	2003.82	1534.85	1977.67	1868.3		59.6114	57.8037	52.0684	55.6607	57.5512	57.7866	52.5546	55.1859
	BPAG_0000043701	543	-	-	-	-	-		Bm9637	Y	WBGene00229898	Bm9637	Bm9637 [Source:UniProtKB/TrEMBL;Acc:A0A0K0JZZ3]	2.7e-133	97.2	181		308	396	401	331	319	389	363	339	395	312	279		349.016	386.509	397.753	356.794	364.677	313.447	343.15	320.271	353.095	318.881	298.542		47.0192	52.1243	54.6611	48.458	50.1939	43.4558	47.4142	44.5892
	BPAG_0000043801	1071	-	-	-	-	-		Bm5519a	Y	WBGene00225780	Bm5519	Bm5519, isoform a; Bm5519, isoform b [Source:UniProtKB/TrEMBL;Acc:A0A0H5SJA6]	3.8e-269	99.4	356		3373	4089	3523	3536	3053	4283	3604	3514	3754	3209	3219		3822.18	3991	3494.47	3811.55	3490.16	3451.14	3406.92	3319.86	3355.74	3279.77	3444.47		261.066	272.88	243.477	262.458	243.555	242.581	238.67	234.338
	BPAG_0000043901	228	-	-	-	-	-		-	-	-	-	-	-	-	-		1	10	8	6	4	18	14	12	10	9	5		1.13317	9.76033	7.93521	6.46756	4.57276	14.504	13.2344	11.337	8.93911	9.19848	5.35022		0.363571	3.1348	2.5971	2.09196	1.49894	4.7889	4.35507	3.75903
	BPAG_0000044001	321	-	-	-	-	-		Bm9638	Y	WBGene00229899	Bm9638	Bm9638 [Source:UniProtKB/TrEMBL;Acc:A0A0J9XSD5]	8.6e-72	97.2	106		594	669	638	553	533	674	619	605	674	614	537		673.102	652.966	632.833	596.093	609.32	543.094	585.151	571.576	602.496	627.541	574.613		153.393	148.959	147.113	136.949	141.867	127.366	136.769	134.611
	BPAG_0000044101	957	-	-	-	-	-		Bm7224	Y	WBGene00227485	Bm7224	Bm7224 [Source:UniProtKB/TrEMBL;Acc:A0A0J9XT08]	1.9e-234	99.1	318		870	1093	917	847	820	1167	1046	1015	1142	947	951		985.857	1066.8	909.574	913.004	937.415	940.342	988.802	958.925	1020.85	967.885	1017.61		75.3584	81.6306	70.9237	70.3573	73.2085	73.9702	77.5214	75.7502
	BPAG_0000044201	1473	IPR004254: AdipoR/Haemolysin-III-related	GO:0016021 - CC - integral component of membrane	04152: AMPK signaling pathway; 04211: Longevity regulating pathway; 04920: Adipocytokine signaling pathway; 04932: Non-alcoholic fatty liver disease (NAFLD)	K07297: adiponectin receptor	-		Bm2728	Y	WBGene00222989	Bma-paqr-1	BMA-PAQR-1 [Source:UniProtKB/TrEMBL;Acc:A0A0K0J778]	0	96.3	490		1419	1601	1675	1475	1412	2066	1814	1597	1899	1612	1591		1607.97	1562.63	1661.44	1589.94	1614.18	1664.74	1714.81	1508.77	1697.54	1647.55	1702.44		79.8553	77.6843	84.1679	79.6025	81.9015	85.0796	87.3446	77.434
	BPAG_0000044301	213	-	-	-	-	-		-	-	-	-	-	-	-	-		0	1	1	2	1	1	1	0	1	0	1		0	0.976033	0.991902	2.15585	1.14319	0.805777	0.945317	0	0.893911	0	1.07004		0	0.335556	0.3475	0.746428	0.401125	0.284786	0.332983	0
	BPAG_0000044401	1176	-	-	03000: Transcription factors	K09178: transcription factor AP-2 delta	-		Bm9639a	Y	WBGene00229900	Bm9639	Bm9639 [Source:UniProtKB/TrEMBL;Acc:A0A5S6PYI9]	3.1e-270	97.9	390		842	897	901	855	820	1045	925	902	1028	835	827		954.128	875.501	893.703	921.627	937.415	842.037	874.418	852.167	918.94	853.415	884.926		59.3511	54.5168	56.709	57.7958	59.5753	53.9023	55.7874	54.7809
	BPAG_0000044501	183	-	-	-	-	-		Bm420	Y	WBGene00220681	Bm420	-	1.5e-22	93	43		27	36	23	26	31	42	47	15	27	33	21		30.5956	35.1372	22.8137	28.0261	35.4389	33.8426	44.4299	14.1713	24.1356	33.7278	22.4709		12.2303	14.0604	9.30274	11.2943	14.4734	13.9218	18.2158	5.85423
	BPAG_0000044601	219	-	-	-	-	-		-	-	-	-	-	-	-	-		21	18	23	12	23	18	30	19	19	12	12		23.7965	17.5686	22.8137	12.9351	26.2933	14.504	28.3595	17.9503	16.9843	12.2646	12.8405		7.94876	5.87453	7.77352	4.35587	8.97312	4.9857	9.71581	6.1964
	BPAG_0000044701	207	-	-	-	-	-		-	-	-	-	-	-	-	-		5	7	8	9	3	5	11	6	6	7	6		5.66584	6.83223	7.93521	9.70134	3.42957	4.02889	10.3985	5.66852	5.36347	7.15437	6.42026		2.00228	2.41698	2.86058	3.45629	1.23826	1.4652	3.76898	2.07019
	BPAG_0000044801	366	-	-	-	-	-		Bm5624	N	WBGene00225885	Bma-unc-58	BMA-UNC-58 [Source:UniProtKB/TrEMBL;Acc:A0A0J9XTJ5]	1.7e-65	97.3	110		12	19	21	15	13	28	21	22	19	23	11		13.598	18.5446	20.8299	16.1689	14.8615	22.5618	19.8517	20.7846	16.9843	23.5072	11.7705		2.71784	3.71037	4.2469	3.25797	3.03474	4.64061	4.06949	4.2931
	BPAG_0000044901	1410	-	GO:0005267 - MF - potassium channel activity; GO:0016020 - CC - membrane; GO:0071805 - BP - potassium ion transmembrane transport	-	-	-		Bm5624	Y	WBGene00225885	Bma-unc-58	BMA-UNC-58 [Source:UniProtKB/TrEMBL;Acc:A0A0J9XTJ5]	0	99.1	468		467	537	512	440	433	581	561	462	430	412	416		529.19	524.129	507.854	474.288	495.001	468.157	530.323	436.476	384.382	421.086	445.138		27.455	27.2207	26.8773	24.8068	26.2379	24.9951	28.2193	23.402
	BPAG_0000045001	204	-	-	-	-	-		-	-	-	-	-	-	-	-		0	0	0	0	0	1	0	0	0	0	3		0	0	0	0	0	0.805777	0	0	0	0	3.21013		0	0	0	0	0	0.29735	0	0
	BPAG_0000045101	633	-	-	-	-	-		Bm7118a	Y	WBGene00227379	Bma-ccg-1	BMA-CCG-1, isoform a; BMA-CCG-1, isoform b [Source:UniProtKB/TrEMBL;Acc:A0A0K0JR01]	1.2e-159	97.1	210		4979	5012	4747	4370	3640	5320	4462	4477	5093	3937	3926		5642.05	4891.88	4708.56	4710.54	4161.21	4286.73	4218.01	4229.66	4552.69	4023.82	4200.99		652.023	565.916	555.073	548.801	491.312	509.807	499.951	505.142
	BPAG_0000045201	1403	IPR002557: Chitin binding domain; IPR036508: Chitin binding domain superfamily	GO:0005576 - CC - extracellular region; GO:0006030 - BP - chitin metabolic process; GO:0008061 - MF - chitin binding	-	-	-		Bm6112a	Y	WBGene00226373	Bma-pqn-74	BMA-PQN-74 [Source:UniProtKB/TrEMBL;Acc:A0A0H5SJD0]	0	96.1	435		627	734	738	579	529	740	749	659	683	604	527		710.497	716.408	732.023	624.12	604.747	596.275	708.043	622.592	610.541	617.32	563.913		37.0454	37.3924	38.9343	32.8064	32.215	31.9943	37.8639	33.5473
	BPAG_0000045301	1149	IPR005804: Fatty acid desaturase domain	GO:0006629 - BP - lipid metabolic process	01004: Lipid biosynthesis proteins	K10257: omega-3 fatty acid desaturase (delta-15 desaturase)	-		Bm6111	Y	WBGene00226372	Bm6111	FA_desaturase domain-containing protein [Source:UniProtKB/TrEMBL;Acc:A0A4E9EUK0]	1.5e-271	98.9	353		3672	4311	4087	3471	3146	4385	4024	4067	4611	3740	3406		4161	4207.68	4053.9	3741.48	3596.47	3533.33	3803.96	3842.31	4121.82	3822.48	3644.57		264.915	268.165	263.281	240.144	233.937	231.498	248.393	252.804
	BPAG_0000045401	393	-	-	-	-	-		Bm7007	Y	WBGene00227268	Bm7007	BMA-MICU-1 [Source:UniProtKB/TrEMBL;Acc:A0A0H5SJF2]	9.6e-94	95.4	130		289	346	420	390	387	540	417	430	524	426	360		327.486	337.707	416.599	420.391	442.414	435.12	394.197	406.244	468.409	435.395	385.216		60.9578	62.9257	79.1026	78.8877	84.1353	83.3488	75.2567	78.1458
	BPAG_0000045501	2667	-	GO:0003824 - MF - catalytic activity	-	-	-		Bm9644a	Y	WBGene00229905	Bm9644	Bm9644 [Source:UniProtKB/TrEMBL;Acc:A0A0H5S746]	0	96.5	802		3498	4120	3966	3532	3333	4544	4049	3838	4282	3624	3477		3963.82	4021.25	3933.88	3807.24	3810.25	3661.45	3827.59	3625.96	3827.73	3703.92	3720.54		108.723	110.413	110.069	105.277	106.776	103.351	107.678	102.781
	BPAG_0000045601	903	IPR001766: Fork head domain; IPR018122: Fork head domain conserved site1; IPR030456: Fork head domain conserved site 2; IPR036388: Winged helix-like DNA-binding domain superfamily; IPR036390: Winged helix DNA-binding domain superfamily	GO:0003700 - MF - transcription factor activity, sequence-specific DNA binding; GO:0006355 - BP - regulation of transcription, DNA-templated; GO:0043565 - MF - sequence-specific DNA binding	03000: Transcription factors; 04068: FoxO signaling pathway	K09385: forkhead box protein G	-		Bm5802a	Y	WBGene00226063	Bma-fkh-2	Fork-head domain-containing protein [Source:UniProtKB/TrEMBL;Acc:A0A4E9EVT4]	3e-215	99.3	300		88	101	121	88	88	124	121	115	71	73	84		99.7188	98.5793	120.02	94.8575	100.601	99.9164	114.383	108.647	63.4677	74.6099	89.8836		8.07828	7.99426	9.91818	7.74698	8.32635	8.32975	9.50385	9.09578
	BPAG_0000045701	1311	IPR018629: XK-related protein	GO:0016021 - CC - integral component of membrane	-	-	-		Bm3197	Y	WBGene00223458	Bma-ced-8	XK-related protein [Source:UniProtKB/TrEMBL;Acc:A0A0H5S5F9]	4.2e-318	97.7	436		580	816	784	772	829	1088	994	992	957	834	828		657.238	796.443	777.651	832.159	947.704	876.686	939.645	937.195	855.473	852.393	885.996		36.6733	44.4869	44.2637	46.8114	54.0271	50.3413	53.7756	54.0429
	BPAG_0000045801	2784	IPR000162: GPCR, family 3, metabotropic glutamate receptor; IPR000337: GPCR, family 3; IPR001828: Receptor, ligand binding region; IPR011500: GPCR, family 3, nine cysteines domain; IPR017978: GPCR family 3, C-terminal; IPR017979: GPCR, family 3, conserved site; IPR028082: Periplasmic binding protein-like I; IPR038550: GPCR, family 3, nine cysteines domain superfamily	GO:0004930 - MF - G-protein coupled receptor activity; GO:0007186 - BP - G-protein coupled receptor signaling pathway; GO:0016021 - CC - integral component of membrane	04030: G protein-coupled receptors; 04072: Phospholipase D signaling pathway; 04080: Neuroactive ligand-receptor interaction; 04724: Glutamatergic synapse; 05030: Cocaine addiction	K04605: metabotropic glutamate receptor 2/3	-		Bm7403a	Y	WBGene00227664	Bma-mgl-1	-	0	93.7	953		400	458	493	456	393	558	500	479	497	415	454		453.267	447.023	489.008	491.535	449.273	449.624	472.659	452.537	444.274	424.152	485.8		11.9101	11.7582	13.1073	13.0207	12.061	12.158	12.738	12.2884
	BPAG_0000045901	1221	-	-	-	-	-		Bm9643	Y	WBGene00229904	Bma-cut-5	ZP domain-containing protein [Source:UniProtKB/TrEMBL;Acc:A0A4E9ET44]	1.9e-294	96.8	406		258	278	246	263	262	351	310	283	314	280	303		292.357	271.337	244.008	283.495	299.515	282.828	293.048	267.365	280.688	286.175	324.223		17.5157	16.2732	14.9126	17.1229	18.3335	17.4377	18.0073	16.5539
	BPAG_0000046001	423	-	-	-	-	-		Bm9642	Y	WBGene00229903	Bm9642	Bm9642 [Source:UniProtKB/TrEMBL;Acc:A0A0K0JZZ9]	5.3e-81	85	127		17	20	22	18	15	33	25	26	32	21	30		19.2639	19.5207	21.8218	19.4027	17.1478	26.5906	23.6329	24.5636	28.6052	21.4631	32.1013		3.33145	3.37936	3.84961	3.38275	3.02978	4.73229	4.19181	4.38998
	BPAG_0000046101	1599	-	GO:0004888 - MF - transmembrane signaling receptor activity; GO:0005216 - MF - ion channel activity; GO:0005230 - MF - extracellular ligand-gated ion channel activity; GO:0006811 - BP - ion transport; GO:0016021 - CC - integral component of membrane; GO:0022848 - MF - acetylcholine-gated cation channel activity; GO:0034220 - BP - ion transmembrane transport; GO:0045211 - CC - postsynaptic membrane	04040: Ion channels	K05312: nicotinic acetylcholine receptor, invertebrate	-		Bm7276	Y	WBGene00227537	Bma-unc-63.2	BMA-UNC-63 [Source:UniProtKB/TrEMBL;Acc:A0A0H5SJG3]	0	98.1	527		453	481	511	444	417	652	489	545	557	478	446		513.325	469.472	506.862	478.599	476.71	525.367	462.26	514.891	497.908	488.542	477.239		23.4841	21.5001	23.6541	22.0735	22.2817	24.7342	21.6901	24.3432
	BPAG_0000046201	213	-	-	-	-	-		-	-	-	-	-	-	-	-		17	5	15	13	4	16	8	12	10	18	9		19.2639	4.88016	14.8785	14.013	4.57276	12.8924	7.56254	11.337	8.93911	18.397	9.63039		6.61597	1.67778	5.2125	4.85178	1.6045	4.55657	2.66386	4.02375
	BPAG_0000046301	1209	-	GO:0003676 - MF - nucleic acid binding	-	-	-		Bm5213a	N	WBGene00225474	Bm5213	Bm5213 [Source:UniProtKB/TrEMBL;Acc:A0A5S6PPC4]	7.1e-224	81.1	402		309	376	356	322	366	433	413	270	391	389	353		350.149	366.988	353.117	347.092	418.407	348.902	390.416	255.083	349.519	397.579	377.725		21.1864	22.2283	21.7951	21.1723	25.8651	21.725	24.2284	15.9502
	BPAG_0000046401	1440	IPR013087: Zinc finger C2H2-type; IPR036236: Zinc finger C2H2 superfamily	GO:0003676 - MF - nucleic acid binding	-	-	-		Bm5213a	Y	WBGene00225474	Bm5213	Bm5213 [Source:UniProtKB/TrEMBL;Acc:A0A5S6PPC4]	9.2e-302	98.3	423		451	528	526	457	504	690	618	539	610	580	541		511.059	515.345	521.74	492.612	576.167	555.986	584.206	509.222	545.286	592.791	578.893		25.962	26.2069	27.0369	25.2285	29.9039	29.066	30.4388	26.7335
	BPAG_0000046501	273	-	-	-	-	-		-	-	-	-	-	-	-	-		2	1	5	3	6	0	2	2	4	0	3		2.26634	0.976033	4.95951	3.23378	6.85913	0	1.89063	1.88951	3.57564	0	3.21013		0.607284	0.261808	1.35563	0.873567	1.8778	0	0.5196	0.523235
	BPAG_0000046601	1359	-	-	04131: Membrane trafficking; 04144: Endocytosis	K12471: epsin	-		Bm5543	Y	WBGene00225804	Bma-epn-1	BMA-EPN-1 [Source:UniProtKB/TrEMBL;Acc:A0A0K0JJB7]	9.9e-320	99.1	452		6095	6905	6475	5841	5152	6841	6312	5964	6536	5112	5259		6906.66	6739.5	6422.56	6296.17	5889.71	5512.32	5966.84	5634.51	5842.6	5224.74	5627.36		371.774	363.153	352.659	341.669	323.904	305.35	329.42	313.435
	BPAG_0000046701	2382	IPR001849: Pleckstrin homology domain; IPR004012: RUN domain; IPR011993: PH-like domain superfamily; IPR037213: RUN domain superfamily	-	-	-	-		Bm9641a	Y	WBGene00229902	Bm9641	Bm9641 [Source:UniProtKB/TrEMBL;Acc:A0A5S6PXR4]	0	96.3	803		2626	3045	2975	2565	2507	3378	2862	2870	2762	2473	2421		2975.7	2972.02	2950.91	2764.88	2865.97	2721.92	2705.5	2711.44	2468.98	2527.54	2590.57		91.3855	91.3672	92.4441	85.6018	89.9233	86.0233	85.2177	86.0538
	BPAG_0000046801	1118	IPR001164: Arf GTPase activating protein; IPR037278: ARFGAP/RecO-like zinc finger; IPR038508: ArfGAP domain superfamily	GO:0005096 - MF - GTPase activator activity	04131: Membrane trafficking; 04144: Endocytosis	K12486: stromal membrane-associated protein	-		Bm6254a	Y	WBGene00226515	Bm6254	Bm6254 [Source:UniProtKB/TrEMBL;Acc:A0A0H5SJD5]	1.4e-232	96.4	335		897	1080	1123	951	1034	1453	1283	1300	1323	1160	1158		1016.45	1054.12	1113.91	1025.11	1182.06	1170.79	1212.84	1228.18	1182.64	1185.58	1239.11		66.5081	69.0441	74.3485	67.6202	79.0203	78.8355	81.3929	83.0484
	BPAG_0000046901	483	-	-	-	-	-		Bm2139	Y	WBGene00222400	Bm2139	-	1.7e-122	97.5	160		352	455	443	324	364	544	473	419	480	478	405		398.875	444.095	439.412	349.248	416.121	438.343	447.135	395.852	429.077	488.542	433.368		60.4115	67.3301	67.8877	53.3255	64.3893	68.3203	69.457	61.9579
	BPAG_0000047001	675	-	GO:0003677 - MF - DNA binding; GO:0006355 - BP - regulation of transcription, DNA-templated; GO:0043565 - MF - sequence-specific DNA binding	-	-	-		Bm5188a	N	WBGene00225449	Bma-cog-1	Cell wall integrity and stress response component 2, putative [Source:UniProtKB/TrEMBL;Acc:A0A4E9FIS8]	1.2e-19	58	69		2329	2745	2361	2232	2048	2779	2450	2171	2153	2052	1828		2639.15	2679.21	2341.88	2405.93	2341.25	2239.25	2316.03	2051.06	1924.59	2097.25	1956.04		286.016	290.659	258.897	262.862	259.23	249.737	257.433	229.713
	BPAG_0000047101	279	-	-	-	-	-		Bm14751	N	WBGene00234936	Bma-nrfl-1	PDZ domain-containing protein [Source:UniProtKB/TrEMBL;Acc:A0A4E9ESY9]	7.5e-52	96.6	87		935	1110	1147	1101	863	1379	1079	1006	1008	926	907		1059.51	1083.4	1137.71	1186.8	986.572	1111.17	1020	950.422	901.062	946.421	970.529		277.8	284.357	304.294	313.704	264.281	299.818	274.296	257.527
	BPAG_0000047201	507	IPR001478: PDZ domain; IPR036034: PDZ superfamily	GO:0005515 - MF - protein binding	-	-	-		Bm14751	Y	WBGene00234936	Bma-nrfl-1	PDZ domain-containing protein [Source:UniProtKB/TrEMBL;Acc:A0A4E9ESY9]	1.5e-71	100	105		687	877	789	721	748	984	870	887	799	712	768		778.487	855.981	782.61	777.185	855.105	792.885	822.426	837.996	714.235	727.702	821.793		112.324	123.634	115.187	113.048	126.053	117.729	121.706	124.953
	BPAG_0000047301	1167	-	GO:0005509 - MF - calcium ion binding	-	-	-		Bm3228a	Y	WBGene00223489	Bma-crld-1	Bm3228 [Source:UniProtKB/TrEMBL;Acc:A0A5S6PJX2]	1.5e-244	86.1	388		2765	2888	2844	2748	2519	3643	3129	2992	3121	2699	2677		3133.21	2818.78	2820.97	2962.14	2879.69	2935.45	2957.9	2826.7	2789.9	2758.52	2864.51		196.403	176.877	180.382	187.19	184.424	189.359	190.168	183.114
	BPAG_0000047401	1722	IPR002562: 3'-5' exonuclease domain; IPR012337: Ribonuclease H-like superfamily; IPR036397: Ribonuclease H superfamily	GO:0003676 - MF - nucleic acid binding; GO:0006139 - BP - nucleobase-containing compound metabolic process; GO:0008408 - MF - 3'-5' exonuclease activity	03019: Messenger RNA biogenesis	K18740: exonuclease 3'-5' domain-containing protein 1	-		Bm2140	Y	WBGene00222401	Bma-egal-1	3'-5' exonuclease domain-containing protein [Source:UniProtKB/TrEMBL;Acc:A0A4E9ETR0]	0	96.6	586		3445	3990	3888	3529	3433	4583	4064	4034	4483	3900	3858		3903.77	3894.37	3856.51	3804	3924.57	3692.88	3841.77	3811.13	4007.4	3986.01	4128.23		165.837	165.609	167.12	162.913	170.334	161.441	167.387	167.314
	BPAG_0000047501	2031	IPR001873: Epithelial sodium channel; IPR004726: Degenerin; IPR020903: Epithelial sodium channel, conserved site	GO:0005216 - MF - ion channel activity; GO:0005272 - MF - sodium channel activity; GO:0006811 - BP - ion transport; GO:0006814 - BP - sodium ion transport; GO:0016020 - CC - membrane; GO:0016021 - CC - integral component of membrane	-	-	-		Bm5374	Y	WBGene00225635	Bm5374	BMA-UNC-8 [Source:UniProtKB/TrEMBL;Acc:A0A0K0JIN3]	0	97.9	676		133	169	166	131	125	208	171	160	153	138	132		150.711	164.95	164.656	141.208	142.899	167.602	161.649	151.161	136.768	141.043	141.246		5.42833	5.94732	6.04968	5.12742	5.25848	6.21229	5.97156	5.62652
	BPAG_0000047601	891	-	GO:0016491 - MF - oxidoreductase activity; GO:0055114 - BP - oxidation-reduction process	-	-	-		Bm4305a	Y	WBGene00224566	Bm4305	Aldo_ket_red domain-containing protein [Source:UniProtKB/TrEMBL;Acc:A0A4E9ERZ8]	1.6e-217	99	296		3264	3584	3344	2969	2780	3734	3316	3568	3667	2867	2886		3698.66	3498.1	3316.92	3200.36	3178.06	3008.77	3134.67	3370.88	3277.97	2930.23	3088.14		303.666	287.498	277.794	264.893	266.58	254.211	263.96	286.007
	BPAG_0000047701	1050	-	GO:0005515 - MF - protein binding	-	-	-		Bm9631	Y	WBGene00229892	Bm9631	N_BRCA1_IG domain-containing protein [Source:UniProtKB/TrEMBL;Acc:A0A4E9ESZ6]	1.5e-234	98.4	315		2012	2562	2342	2075	1892	2715	2279	2334	2497	2090	2002		2279.94	2500.6	2323.03	2236.7	2162.91	2187.68	2154.38	2205.05	2232.1	2136.09	2142.23		158.841	174.395	165.094	157.096	153.954	156.848	153.942	158.76
	BPAG_0000047801	3564	IPR019460: Autophagy-related protein 11	-	01009: Protein phosphatases and associated proteins; 03029: Mitochondrial biogenesis; 04131: Membrane trafficking; 04140: Autophagy - animal; 04211: Longevity regulating pathway; 05017: Spinocerebellar ataxia	K17589: RB1-inducible coiled-coil protein 1	-		Bm5668a	Y	WBGene00225929	Bma-epg-7	ATG11 domain-containing protein [Source:UniProtKB/TrEMBL;Acc:A0A4E9EUF5]	0	96.1	1162		3615	4475	4244	4022	4002	5521	4652	4786	4766	4300	4359		4096.4	4367.75	4209.63	4335.42	4575.04	4448.7	4397.62	4521.59	4260.38	4394.83	4664.32		84.0804	89.7429	88.1398	89.7102	95.9399	93.9676	92.5771	95.9102
	BPAG_0000047901	360	-	-	-	-	-		Bm13074	Y	WBGene00233335	Bm13074	Bm13074 [Source:UniProtKB/TrEMBL;Acc:A0A0H5S759]	3.2e-21	74.2	62		114	124	115	92	117	161	137	124	115	128	133		129.181	121.028	114.069	99.1693	133.753	129.73	129.508	117.149	102.8	130.823	142.316		26.2498	24.6186	23.6445	20.3153	27.7679	27.1282	26.9911	24.6008
	BPAG_0000048001	483	IPR000504: RNA recognition motif domain; IPR012677: Nucleotide-binding alpha-beta plait domain superfamily; IPR035979: RNA-binding domain superfamily	GO:0003676 - MF - nucleic acid binding	03041: Spliceosome	K13188: RNA-binding protein 7	-		Bm6389	Y	WBGene00226650	Bma-rbm-7	RRM domain-containing protein [Source:UniProtKB/TrEMBL;Acc:A0A4E9ESZ7]	1e-102	100	137		643	788	754	647	606	975	747	770	824	612	636		728.627	769.114	747.894	697.419	692.772	785.633	706.152	727.46	736.583	625.497	680.547		110.354	116.607	115.547	106.487	107.198	122.449	109.692	113.861
	BPAG_0000048101	9210	-	GO:0005515 - MF - protein binding	-	-	-		Bm4372a	Y	WBGene00224633	Bma-rbc-1	BMA-RBC-1 [Source:UniProtKB/TrEMBL;Acc:A0A5S6PMT2]	0	95.2	3071		4263	4925	5130	4607	4866	6941	6158	5979	6022	5364	5453		4830.7	4806.96	5088.46	4966.01	5562.76	5592.9	5821.26	5648.68	5383.13	5482.29	5834.95		38.369	38.2201	41.228	39.7645	45.1411	45.7152	47.4222	46.3659
	BPAG_0000048201	545	-	-	-	-	-		-	-	-	-	-	-	-	-		3	4	11	3	4	14	13	7	16	23	6		3.39951	3.90413	10.9109	3.23378	4.57276	11.2809	12.2891	6.61327	14.3026	23.5072	6.42026		0.456298	0.524576	1.49393	0.437585	0.62708	1.55822	1.6918	0.917342
	BPAG_0000048301	972	IPR004843: Calcineurin-like phosphoesterase domain, ApaH type; IPR006186: Serine/threonine-specific protein phosphatase/bis(5-nucleosyl)-tetraphosphatase; IPR029052: Metallo-dependent phosphatase-like	GO:0016787 - MF - hydrolase activity	01009: Protein phosphatases and associated proteins; 03015: mRNA surveillance pathway; 03036: Chromosome and associated proteins; 04013: MAPK signaling pathway - fly; 04071: Sphingolipid signaling pathway; 04111: Cell cycle - yeast; 04113: Meiosis - yeast; 04114: Oocyte meiosis; 04136: Autophagy - other; 04138: Autophagy - yeast; 04140: Autophagy - animal; 04147: Exosome; 04151: PI3K-Akt signalin…	K04382: serine/threonine-protein phosphatase 2A catalytic subunit	-		Bm13713	Y	WBGene00233974	Bma-let-92	Serine/threonine-protein phosphatase [Source:UniProtKB/TrEMBL;Acc:A0A4E9ES08]	1.8e-255	99.7	323		1781	2044	2026	1763	1807	2424	2185	2001	2287	1887	1804		2018.17	1995.01	2009.59	1900.38	2065.74	1953.2	2065.52	1890.45	2044.37	1928.61	1930.36		151.887	150.3	154.279	144.186	158.837	151.274	159.436	147.032
	BPAG_0000048401	2238	IPR000719: Protein kinase domain; IPR008271: Serine/threonine-protein kinase, active site; IPR010513: KEN domain; IPR011009: Protein kinase-like domain superfamily; IPR018997: PUB domain; IPR038357: KEN domain superfamily	GO:0004540 - MF - ribonuclease activity; GO:0004672 - MF - protein kinase activity; GO:0005524 - MF - ATP binding; GO:0006397 - BP - mRNA processing; GO:0006468 - BP - protein phosphorylation	01001: Protein kinases; 04140: Autophagy - animal; 04141: Protein processing in endoplasmic reticulum; 04210: Apoptosis; 04932: Non-alcoholic fatty liver disease (NAFLD); 05010: Alzheimer disease; 05017: Spinocerebellar ataxia	K08852: serine/threonine-protein kinase/endoribonuclease IRE1	-		Bm2688a	Y	WBGene00222949	Bma-ire-1	BMA-IRE-1, isoform a [Source:UniProtKB/TrEMBL;Acc:A0A0I9NA33]	0	97	733		2259	2833	2762	2965	2770	4320	3507	3395	3492	3144	3257		2559.83	2765.1	2739.63	3196.05	3166.63	3480.96	3315.23	3207.44	3121.54	3213.34	3485.13		83.672	90.4756	91.3477	105.318	105.75	117.091	111.142	108.345
	BPAG_0000048501	1347	IPR000217: Tubulin; IPR002453: Beta tubulin; IPR003008: Tubulin/FtsZ, GTPase domain; IPR008280: Tubulin/FtsZ, C-terminal; IPR013838: Beta tubulin, autoregulation binding site; IPR017975: Tubulin, conserved site; IPR018316: Tubulin/FtsZ, 2-layer sandwich domain; IPR023123: Tubulin, C-terminal; IPR036525: Tubulin/FtsZ, GTPase domain superfamily; IPR037103: Tubulin/FtsZ, C-terminal domain superfamily	GO:0003924 - MF - GTPase activity; GO:0005200 - MF - structural constituent of cytoskeleton; GO:0005525 - MF - GTP binding; GO:0005874 - CC - microtubule; GO:0007017 - BP - microtubule-based process	03036: Chromosome and associated proteins; 04145: Phagosome; 04147: Exosome; 04540: Gap junction; 04812: Cytoskeleton proteins; 05130: Pathogenic Escherichia coli infection	K07375: tubulin beta	-		Bm4733	Y	WBGene00224994	Bm4733	Tubulin beta chain [Source:UniProtKB/TrEMBL;Acc:A0A4E9FEA3]	0	100	448		23489	25508	23403	22265	18709	25594	23374	21886	23153	17908	18175		26617	24896.6	23213.5	24000	21387.9	20623.1	22095.8	20676.9	20696.7	18302.9	19448		1445.51	1353.49	1285.99	1313.99	1186.7	1152.57	1230.74	1160.46
	BPAG_0000048601	267	-	-	-	-	-		-	-	-	-	-	-	-	-		1	1	3	1	2	4	6	2	2	6	1		1.13317	0.976033	2.9757	1.07793	2.28638	3.22311	5.6719	1.88951	1.78782	6.13232	1.07004		0.310465	0.267691	0.831657	0.297732	0.639998	0.908755	1.59383	0.534993
	BPAG_0000048701	2586	IPR000591: DEP domain; IPR036388: Winged helix-like DNA-binding domain superfamily; IPR036390: Winged helix DNA-binding domain superfamily	GO:0035556 - BP - intracellular signal transduction	-	-	-		Bm4923	Y	WBGene00225184	Bm4923	-	0	97.1	806		1631	2056	1844	1814	1484	2233	1928	1927	1948	1792	1576		1848.2	2006.72	1829.07	1955.36	1696.49	1799.3	1822.57	1820.54	1741.34	1831.52	1686.39		52.2817	56.825	52.7797	55.763	49.0304	52.3791	52.8786	53.221
	BPAG_0000048801	1536	-	GO:0003743 - MF - translation initiation factor activity; GO:0005737 - CC - cytoplasm; GO:0005852 - CC - eukaryotic translation initiation factor 3 complex	03012: Translation factors	K15029: translation initiation factor 3 subunit L	-		Bm2278	Y	WBGene00222539	Bma-eif-3.L	Eukaryotic translation initiation factor 3 subunit L [Source:UniProtKB/TrEMBL;Acc:A0A4E9FEI0]	0	99	498		3244	3591	3554	3205	2746	4139	3469	3372	3709	3173	3034		3676	3504.93	3525.22	3454.75	3139.2	3335.11	3279.31	3185.71	3315.52	3242.98	3246.51		175.071	167.097	171.262	165.872	152.746	163.457	160.182	156.793
	BPAG_0000048901	681	-	GO:0016021 - CC - integral component of membrane	-	-	-		Bm13889	Y	WBGene00234150	Bma-rer-1	-	5e-131	85.4	226		690	733	777	709	726	956	771	876	888	785	747		781.886	715.432	770.708	764.25	829.955	770.323	728.84	827.604	793.793	802.312	799.322		83.9897	76.9311	84.4516	82.7631	91.0855	85.1547	80.2988	91.8728
	BPAG_0000049001	1395	IPR001680: WD40 repeat; IPR015943: WD40/YVTN repeat-like-containing domain superfamily; IPR017986: WD40-repeat-containing domain; IPR036322: WD40-repeat-containing domain superfamily	GO:0005515 - MF - protein binding	03012: Translation factors	K23325: -	-		Bm4140	Y	WBGene00224401	Bm4140	WD domain containing protein [Source:UniProtKB/TrEMBL;Acc:A0A4E9FDW6]	7.0e-318	92.9	466		738	814	942	891	800	1231	961	995	1048	1062	985		836.278	794.491	934.371	960.433	914.551	991.912	908.45	940.03	936.819	1085.42	1053.99		43.8537	41.7057	49.9817	50.7739	48.9977	53.5281	48.8597	50.9423
	BPAG_0000049101	843	IPR017853: Glycoside hydrolase superfamily	-	-	-	-		Bm2275a	Y	WBGene00222536	Bm2275	Bm2275 [Source:UniProtKB/TrEMBL;Acc:A0A5S6PGY4]	3.1e-201	95.7	281		90	173	203	75	137	209	176	237	140	167	99		101.985	168.854	201.356	80.8445	156.617	168.407	166.376	223.907	125.148	170.683	105.934		8.84992	14.6677	17.8239	7.07247	13.8852	15.0389	14.8077	20.0794
	BPAG_0000049201	897	-	GO:0016787 - MF - hydrolase activity	-	-	-		Bm4559a	Y	WBGene00224820	Bma-lips-9	Lipase family protein [Source:UniProtKB/TrEMBL;Acc:A0A4E9FEH0]	1.5e-223	99.3	298		93	112	128	112	105	139	118	97	132	162	133		105.385	109.316	126.963	120.728	120.035	112.003	111.547	91.6411	117.996	165.573	142.316		8.59438	8.92422	10.5621	9.92574	10.0013	9.39984	9.33021	7.72341
	BPAG_0000049301	3477	-	GO:0005515 - MF - protein binding	03040: Spliceosome; 03041: Spliceosome; 04212: Longevity regulating pathway - worm	K12824: transcription elongation regulator 1	-		Bm7628a	Y	WBGene00227889	Bm7628	Bm7628 [Source:UniProtKB/TrEMBL;Acc:A0A5S6PV97]	0	99.1	1158		7366	8698	8740	8916	8750	12298	10265	9432	10493	9188	8935		8346.92	8489.53	8669.22	9610.79	10002.9	9909.45	9703.68	8910.91	9379.81	9390.63	9560.84		175.611	178.797	186.055	203.846	215.012	214.55	209.39	193.744
	BPAG_0000049401	147	-	-	-	-	-		-	-	-	-	-	-	-	-		7	3	2	2	1	1	0	0	0	0	1		7.93218	2.9281	1.9838	2.15585	1.14319	0.805777	0	0	0	0	1.07004		3.94734	1.45864	1.00704	1.08156	0.581223	0.412649	0	0
	BPAG_0000049501	711	IPR036291: NAD(P)-binding domain superfamily	-	00790: Folate biosynthesis	K00357: dihydropteridine reductase	-		Bm5513a	Y	WBGene00225774	Bma-qdpr-1	BMA-QDPR-1 [Source:UniProtKB/TrEMBL;Acc:A0A5S6PQG9]	3e-174	100	236		470	545	532	455	401	574	499	483	512	437	398		532.589	531.938	527.692	490.457	458.419	462.516	471.713	456.316	457.682	446.637	425.877		54.7965	54.7863	55.383	50.8721	48.1875	48.9712	49.7775	48.5185
	BPAG_0000049601	1332	IPR007009: SHQ1 protein; IPR007052: CS domain; IPR008978: HSP20-like chaperone	-	03009: Ribosome biogenesis	K14764: protein SHQ1	C48		Bm6631a	Y	WBGene00226892	Bm6631	HYPOTHETICAL 59.2KD PROTEIN IN PFK26-SGA1 INTERGENIC REGION, putative [Source:UniProtKB/TrEMBL;Acc:A0A4E9FP98]	0	96.8	443		754	718	847	731	739	1107	877	881	907	823	794		854.409	700.791	840.141	787.964	844.817	891.995	829.043	832.328	810.777	841.15	849.614		46.9236	38.527	47.0667	43.6265	47.4024	50.4129	46.6979	47.2391
	BPAG_0000049701	3834	IPR002553: Clathrin/coatomer adaptor, adaptin-like, N-terminal; IPR011989: Armadillo-like helical; IPR016024: Armadillo-type fold	GO:0005488 - MF - binding; GO:0006886 - BP - intracellular protein transport; GO:0016192 - BP - vesicle-mediated transport; GO:0030117 - CC - membrane coat	04131: Membrane trafficking; 04142: Lysosome	K12396: AP-3 complex subunit delta-1	-		Bm12018	Y	WBGene00232279	Bma-apd-3	Adaptin, putative [Source:UniProtKB/TrEMBL;Acc:A0A4E9FCK0]	0	96.9	1271		666	842	861	880	892	1245	1059	1087	1239	1040	1044		754.69	821.819	854.027	948.575	1019.72	1003.19	1001.09	1026.95	1107.56	1062.94	1117.13		14.3995	15.6966	16.6221	18.246	19.878	19.6977	19.5905	20.2492
	BPAG_0000049801	1332	-	GO:0005515 - MF - protein binding	-	-	-		Bm1940a	Y	WBGene00222201	Bm1940	Bm1940 [Source:UniProtKB/TrEMBL;Acc:A0A5S6PFX7]	0	99.5	443		264	315	281	284	276	379	281	303	371	281	247		299.157	307.45	278.724	306.131	315.52	305.39	265.634	286.26	331.641	287.197	264.301		16.4295	16.9025	15.6148	16.9493	17.7037	17.2597	14.9625	16.2468
	BPAG_0000049901	2016	IPR000731: Sterol-sensing domain; IPR003392: Protein patched/dispatched	GO:0016021 - CC - integral component of membrane	-	-	-		Bm11176a	Y	WBGene00231437	Bma-ptr-18	BMA-PTR-18; Bm11176 [Source:UniProtKB/TrEMBL;Acc:A0A1P6BIP2]	0	99.9	671		548	672	844	670	767	1131	748	665	873	772	713		620.976	655.894	837.165	722.211	876.826	911.334	707.097	628.261	780.384	789.025	762.941		22.5328	23.8245	30.9875	26.4193	32.5061	34.0306	26.3156	23.5592
	BPAG_0000050001	576	IPR001611: Leucine-rich repeat; IPR032675: Leucine-rich repeat domain superfamily	GO:0005515 - MF - protein binding	-	-	-		Bm4924a	Y	WBGene00225185	Bm4924	Bm4924 [Source:UniProtKB/TrEMBL;Acc:A0A5S6PNY9]	1.2e-93	95.5	178		655	745	612	553	553	754	597	595	789	716	517		742.225	727.144	607.044	596.093	632.183	607.556	564.354	562.128	705.296	731.79	553.212		94.2634	92.444	78.6436	76.3203	82.0281	79.4048	73.5112	73.7775
	BPAG_0000050101	1722	IPR021869: Ribonuclease Zc3h12a-like, NYN domain	-	-	-	-		Bm6342	Y	WBGene00226603	Bm6342	Bm6342 [Source:UniProtKB/TrEMBL;Acc:A0A0K0JMS0]	0	96.4	557		349	336	311	310	292	323	346	315	661	578	338		395.476	327.947	308.481	334.157	333.811	260.266	327.08	297.597	590.875	590.747	361.675		16.8003	13.946	13.3678	14.3109	14.488	11.378	14.251	13.0649
	BPAG_0000050201	2292	IPR001164: Arf GTPase activating protein; IPR013724: GIT, Spa2 homology (SHD) domain; IPR020683: Ankyrin repeat-containing domain; IPR022018: ARF GTPase-activating protein GIT1, C-terminal; IPR032352: Arf GTPase-activating protein GIT1/2, coiled-coil domain; IPR036770: Ankyrin repeat-containing domain superfamily; IPR037278: ARFGAP/RecO-like zinc finger; IPR038508: ArfGAP domain superfamily	GO:0005096 - MF - GTPase activator activity	04131: Membrane trafficking; 04144: Endocytosis; 05135: Yersinia infection	K12487: G protein-coupled receptor kinase interactor 2	-		Bm3370a	Y	WBGene00223631	Bma-git-1	BMA-GIT-1 [Source:UniProtKB/TrEMBL;Acc:A0A5S6PKC9]	0	98.6	763		3660	4050	3790	3429	2996	4330	3805	3765	3945	3310	3408		4147.4	3952.93	3759.31	3696.21	3424.99	3489.02	3596.93	3557	3526.48	3383	3646.71		132.37	126.295	122.394	118.93	111.683	114.596	117.745	117.322
	BPAG_0000050301	2982	IPR006925: Vps16, C-terminal; IPR006926: Vps16, N-terminal; IPR016534: Vacuolar protein sorting-associated protein 16; IPR038132: Vps16, C-terminal domain superfamily	GO:0005737 - CC - cytoplasm; GO:0006886 - BP - intracellular protein transport; GO:0007033 - BP - vacuole organization	04131: Membrane trafficking; 04138: Autophagy - yeast; 05132: Salmonella infection	K20180: -	-		Bm18160	Y	WBGene00269300	Bma-vps-16	Vacuolar protein sorting-associated protein 16 homolog [Source:UniProtKB/TrEMBL;Acc:A0A5S6PFA5]	0	92.7	1034		2736	3346	3195	2822	2890	4134	3592	3430	3334	2921	2955		3100.35	3265.8	3169.13	3041.91	3303.82	3331.08	3395.58	3240.5	2980.3	2985.42	3161.98		76.0559	80.1979	79.3044	75.2293	82.8037	84.0932	85.4339	82.1516
	BPAG_0000050401	1572	IPR004299: Membrane bound O-acyl transferase, MBOAT	-	-	-	-		Bm6910	Y	WBGene00227171	Bma-hhat-2	BMA-HHAT-2 [Source:UniProtKB/TrEMBL;Acc:A0A0K0JQ52]	0	97.9	523		1341	1555	1361	1230	1198	1558	1385	1396	1637	1461	1219		1519.58	1517.73	1349.98	1325.85	1369.54	1255.4	1309.26	1318.88	1463.33	1493.22	1304.38		70.7132	70.7005	64.0826	62.1999	65.1125	60.1192	62.4883	63.4253
	BPAG_0000050501	1422	-	GO:0015031 - BP - protein transport; GO:0016020 - CC - membrane	02044: Secretion system; 03060: Protein export; 04141: Protein processing in endoplasmic reticulum; 04145: Phagosome; 05110: Vibrio cholerae infection	K10956: protein transport protein SEC61 subunit alpha	-		Bm13841	Y	WBGene00234102	Bma-sec-61.A	Plug_translocon domain-containing protein [Source:UniProtKB/TrEMBL;Acc:A0A4E9ETL0]	0	100	473		3135	3488	3680	3178	3181	4513	4003	3673	3863	3311	2969		3552.48	3404.4	3650.2	3425.65	3636.48	3636.47	3784.1	3470.08	3453.18	3384.02	3176.96		182.752	175.316	191.55	177.661	191.128	192.515	199.658	184.481
	BPAG_0000050601	11037	IPR000034: Laminin IV; IPR000742: EGF-like domain; IPR001791: Laminin G domain; IPR002049: Laminin EGF domain; IPR008211: Laminin, N-terminal; IPR008979: Galactose-binding-like domain superfamily; IPR010307: Laminin domain II; IPR013320: Concanavalin A-like lectin/glucanase domain superfamily; IPR038684: Laminin, N-terminal domain superfamily	GO:0007155 - BP - cell adhesion	04151: PI3K-Akt signaling pathway; 04510: Focal adhesion; 04512: ECM-receptor interaction; 05145: Toxoplasmosis; 05146: Amoebiasis; 05165: Human papillomavirus infection; 05200: Pathways in cancer; 05222: Small cell lung cancer	K06240: laminin, alpha 3/5	-		Bm4903a	Y	WBGene00225164	Bma-epi-1	LAM_G_DOMAIN domain-containing protein [Source:UniProtKB/TrEMBL;Acc:A0A4E9ERU0]	0	98.2	3677		5419	6209	5914	5367	5110	6836	6447	5655	5126	5100	5140		6140.64	6060.19	5866.11	5785.23	5841.69	5508.29	6094.46	5342.58	4582.19	5212.47	5500.02		40.6998	40.2083	39.6611	38.6561	39.5576	37.5707	41.4294	36.5941
	BPAG_0000050701	1023	IPR011021: Arrestin-like, N-terminal; IPR011022: Arrestin C-terminal-like domain; IPR014752: Arrestin, C-terminal; IPR014756: Immunoglobulin E-set	GO:0007165 - BP - signal transduction	-	-	-		Bm5209	Y	WBGene00225470	Bma-arrd-26	BMA-ARRD-26 [Source:UniProtKB/TrEMBL;Acc:A0A0H5S5K3]	2.7e-229	93.5	340		1845	2091	1953	1857	1594	2243	2110	2167	2170	1901	1725		2090.7	2040.88	1937.18	2001.71	1822.24	1807.36	1994.62	2047.28	1939.79	1942.92	1845.82		149.501	146.091	141.306	144.302	133.129	133	146.288	151.291
	BPAG_0000050801	1926	-	-	-	-	-		Bm2584a	Y	WBGene00222845	Bma-rsd-3	ENTH domain-containing protein [Source:UniProtKB/TrEMBL;Acc:A0A5S6PI52]	0	96	601		1788	2247	2354	2192	2319	3342	2732	2631	2919	2580	2504		2026.11	2193.15	2334.94	2362.82	2651.05	2692.91	2582.61	2485.65	2609.33	2636.9	2679.39		76.9548	83.3857	90.4658	90.4736	102.874	105.256	100.607	97.5651
	BPAG_0000050901	855	-	-	-	-	-		Bm9620	Y	WBGene00229881	Bm9620	-	1.7e-186	95.4	262		130	149	167	140	140	217	175	161	202	133	124		147.312	145.429	165.648	150.91	160.046	174.854	165.43	152.105	180.57	135.933	132.685		12.6038	12.4556	14.4572	13.0167	13.9901	15.3954	14.5169	13.449
	BPAG_0000051001	4406	IPR038077: Troponin domain superfamily	-	-	-	-		Bm2203a	Y	WBGene00222464	Bm2203	Bm2203, isoform c [Source:UniProtKB/TrEMBL;Acc:A0A5S6PGR8]	0	94.4	1310		3159	3909	3687	2936	3096	4662	3408	3580	3076	3212	2974		3579.68	3815.31	3657.14	3164.79	3539.31	3756.53	3221.64	3382.22	2749.67	3282.84	3182.31		59.4332	63.4112	61.9388	52.9723	60.0366	64.1839	54.8601	58.0321
	BPAG_0000051101	2889	IPR000315: B-box-type zinc finger; IPR001258: NHL repeat; IPR001298: Filamin/ABP280 repeat; IPR001841: Zinc finger, RING-type; IPR011042: Six-bladed beta-propeller, TolB-like; IPR013017: NHL repeat, subgroup; IPR013083: Zinc finger, RING/FYVE/PHD-type; IPR013783: Immunoglobulin-like fold; IPR014756: Immunoglobulin E-set; IPR017868: Filamin/ABP280 repeat-like; IPR017907: Zinc finger, RING-type, co…	GO:0005515 - MF - protein binding; GO:0005622 - CC - intracellular; GO:0008270 - MF - zinc ion binding	03019: Messenger RNA biogenesis; 04121: Ubiquitin system; 04361: Axon regeneration; 05206: MicroRNAs in cancer	K12035: tripartite motif-containing protein 71	-		Bm2158a	Y	WBGene00222419	Bma-lin-41	Bm2158, isoform e [Source:UniProtKB/TrEMBL;Acc:A0A5S6PGS2]	0	94.7	931		204	265	297	270	326	413	343	347	384	287	361		231.166	258.649	294.595	291.04	372.68	332.786	324.244	327.829	343.262	293.329	386.286		5.85338	6.55606	7.60927	7.4294	9.64117	8.67163	8.4207	8.57851
	BPAG_0000051201	1539	-	GO:0003972 - MF - RNA ligase (ATP) activity; GO:0006388 - BP - tRNA splicing, via endonucleolytic cleavage and ligation; GO:0006396 - BP - RNA processing; GO:0008452 - MF - RNA ligase activity; GO:0072669 - CC - tRNA-splicing ligase complex	03016: Transfer RNA biogenesis	K14415: tRNA-splicing ligase RtcB	-		Bm3402	Y	WBGene00223663	Bma-rtcb-1	RNA-splicing ligase RtcB homolog [Source:UniProtKB/Swiss-Prot;Acc:A8QC60]	0	98	512		2434	3012	2761	2380	2247	3052	2828	2682	3240	2632	2426		2758.13	2939.81	2738.64	2565.47	2568.75	2459.23	2673.36	2533.83	2896.27	2690.04	2595.92		131.101	139.882	132.789	122.935	124.745	120.294	130.329	124.466
	BPAG_0000051301	387	-	-	-	-	-		Bm7262	Y	WBGene00227523	Bm7262	-	1e-46	88.4	86		225	280	290	237	234	321	319	307	333	338	281		254.963	273.289	287.651	255.469	267.506	258.654	301.556	290.039	297.672	345.454	300.682		48.1943	51.7121	55.4653	48.6827	51.6612	50.3144	58.4631	56.6575
	BPAG_0000051401	3312	-	GO:0000166 - MF - nucleotide binding; GO:0002161 - MF - aminoacyl-tRNA editing activity; GO:0004812 - MF - aminoacyl-tRNA ligase activity; GO:0004822 - MF - isoleucine-tRNA ligase activity; GO:0005524 - MF - ATP binding; GO:0005737 - CC - cytoplasm; GO:0006418 - BP - tRNA aminoacylation for protein translation; GO:0006428 - BP - isoleucyl-tRNA aminoacylation	00970: Aminoacyl-tRNA biosynthesis; 01007: Amino acid related enzymes; 03016: Transfer RNA biogenesis	K01870: isoleucyl-tRNA synthetase	-		Bm2357a	Y	WBGene00222618	Bma-iars-2	-	0	92.9	981		3272	3825	3949	3579	3470	5159	4126	4307	3923	3805	3714		3707.73	3733.32	3917.02	3857.9	3966.87	4157	3900.38	4069.05	3506.81	3888.91	3974.14		81.8931	82.5441	88.2533	85.9031	89.5156	94.4873	88.3569	92.8783
	BPAG_0000051501	2667	IPR007191: Sec8 exocyst complex component specific domain	GO:0000145 - CC - exocyst; GO:0006904 - BP - vesicle docking involved in exocytosis; GO:0015031 - BP - protein transport	04131: Membrane trafficking; 05132: Salmonella infection	K06111: exocyst complex component 4	-		Bm7264b	Y	WBGene00227525	Bma-sec-8	Sec8_exocyst domain-containing protein [Source:UniProtKB/TrEMBL;Acc:A0A4E9FM19]	0	95.5	914		2774	3262	3135	2844	2533	3718	3175	3082	2668	2648	2593		3143.41	3183.82	3109.61	3065.62	2895.7	2995.88	3001.38	2911.73	2384.95	2706.4	2774.62		86.2199	87.419	87.0059	84.7704	81.1469	84.5638	84.435	82.5352
	BPAG_0000051601	1062	IPR013087: Zinc finger C2H2-type	GO:0003676 - MF - nucleic acid binding	-	-	-		Bm12914	Y	WBGene00233175	Bm12914	C2H2-type domain-containing protein [Source:UniProtKB/TrEMBL;Acc:A0A4E9FHU9]	5.4e-92	99.2	133		969	1073	1202	1035	905	1263	1126	1052	1423	1091	1042		1098.04	1047.28	1192.27	1115.65	1034.59	1017.7	1064.43	993.88	1272.04	1115.06	1114.99		75.6351	72.2138	83.7749	77.4735	72.8088	72.1401	75.1996	70.7491
	BPAG_0000051701	678	-	-	-	-	-		-	-	-	-	-	-	-	-		336	394	381	349	332	451	371	367	604	485	390		380.745	384.557	377.915	376.196	379.539	363.406	350.713	346.724	539.922	495.696	417.317		41.0803	41.5347	41.5939	40.9198	41.8377	40.3501	38.8102	38.6604
	BPAG_0000051801	1518	IPR001611: Leucine-rich repeat; IPR003591: Leucine-rich repeat, typical subtype; IPR003598: Immunoglobulin subtype 2; IPR003599: Immunoglobulin subtype; IPR007110: Immunoglobulin-like domain; IPR013098: Immunoglobulin I-set; IPR013783: Immunoglobulin-like fold; IPR032675: Leucine-rich repeat domain superfamily; IPR036179: Immunoglobulin-like domain superfamily	GO:0005515 - MF - protein binding	-	-	-		Bm12915	Y	WBGene00233176	Bm12915	Ig-like domain-containing protein [Source:UniProtKB/TrEMBL;Acc:A0A4E9FJ71]	2.3e-220	94.8	324		239	356	287	306	236	341	231	263	237	280	229		270.827	347.468	284.676	329.846	269.793	274.77	218.368	248.47	211.857	286.175	245.04		13.0512	16.7619	13.9941	16.0246	13.2831	13.6264	10.793	12.3741
	BPAG_0000051901	399	-	-	-	-	-		-	-	-	-	-	-	-	-		228	228	222	196	227	256	248	259	275	240	218		258.362	222.535	220.202	211.274	259.504	206.279	234.439	244.691	245.826	245.293	233.269		47.3681	40.842	41.1826	39.05	48.6086	38.9193	44.084	46.3614
	BPAG_0000052001	2928	-	GO:0016021 - CC - integral component of membrane	-	-	-		Bm3064a	Y	WBGene00223325	Bma-maco-1	-	0	95.4	971		2587	2988	2842	2766	2727	3700	3213	3207	3500	2883	3098		2931.51	2916.39	2818.98	2981.55	3117.48	2981.38	3037.3	3029.82	3128.69	2946.58	3314.99		73.2402	72.9381	71.8435	75.0963	79.5745	76.6529	77.829	78.2272
	BPAG_0000052101	1350	IPR001680: WD40 repeat; IPR015943: WD40/YVTN repeat-like-containing domain superfamily; IPR017986: WD40-repeat-containing domain; IPR036322: WD40-repeat-containing domain superfamily	GO:0005515 - MF - protein binding	03009: Ribosome biogenesis	K14829: pre-rRNA-processing protein IPI3	-		Bm5442a	Y	WBGene00225703	Bma-pro-1	BMA-PRO-1 [Source:UniProtKB/TrEMBL;Acc:A0A5S6PQ59]	7.1e-319	98	449		3133	3557	3309	3228	2865	4084	3380	3361	3693	3023	2795		3550.22	3471.75	3282.2	3479.55	3275.24	3290.79	3195.17	3175.32	3301.21	3089.67	2990.77		192.376	188.319	181.425	190.08	181.322	183.506	177.576	177.813
	BPAG_0000052201	471	IPR013219: Ribosomal protein S27/S33, mitochondrial	-	-	-	-		Bm3487a	Y	WBGene00223748	Bma-mrps-33	BMA-MRPS-33 [Source:UniProtKB/TrEMBL;Acc:A0A5S6PKQ0]	1.5e-105	98.7	151		1008	969	1040	886	851	1145	960	995	1171	978	911		1142.23	945.776	1031.58	955.043	972.854	922.615	907.504	940.03	1046.77	999.568	974.809		177.404	147.044	163.436	149.538	154.372	147.463	144.561	150.88
	BPAG_0000052301	558	-	GO:0004843 - MF - ubiquitin-specific protease activity; GO:0016579 - BP - protein deubiquitination	01002: Peptidases and inhibitors; 04121: Ubiquitin system	K15235: josephin	C86		Bm7081	Y	WBGene00227342	Bma-josd-1	Josephin domain-containing protein [Source:UniProtKB/TrEMBL;Acc:A0A4E9FNR4]	9.1e-137	98.4	185		102	151	157	133	141	196	192	192	218	202	148		115.583	147.381	155.729	143.364	161.19	157.932	181.501	181.393	194.873	206.455	158.366		15.1527	19.3414	20.8257	18.9476	21.5896	21.3069	24.4044	24.5752
	BPAG_0000052401	1905	IPR001841: Zinc finger, RING-type; IPR011016: Zinc finger, RING-CH-type; IPR013083: Zinc finger, RING/FYVE/PHD-type; IPR025754: TRC8 N-terminal domain	GO:0008270 - MF - zinc ion binding	-	-	-		Bm7327	Y	WBGene00227588	Bma-rnf-145	RING-type domain-containing protein [Source:UniProtKB/TrEMBL;Acc:A0A4E9FHV8]	0	86.3	658		1329	1773	1557	1387	1356	1952	1810	1770	1871	1671	1684		1505.98	1730.51	1544.39	1495.08	1550.16	1572.88	1711.02	1672.21	1672.51	1707.85	1801.95		57.8301	66.521	60.4962	57.8787	60.8169	62.156	67.3884	66.3603
	BPAG_0000052501	753	IPR001857: Ribosomal protein L19; IPR008991: Translation protein SH3-like domain superfamily; IPR038657: Ribosomal protein L19 superfamily	GO:0003735 - MF - structural constituent of ribosome; GO:0005622 - CC - intracellular; GO:0005840 - CC - ribosome; GO:0006412 - BP - translation	03010: Ribosome; 03011: Ribosome	K02884: large subunit ribosomal protein L19	-		Bm7326	Y	WBGene00227587	Bma-mrpl-19	BMA-MRPL-19 [Source:UniProtKB/TrEMBL;Acc:A0A0I9N7Q6]	4.7e-155	95.6	228		771	894	903	770	776	1190	920	1015	1008	962	847		873.673	872.573	895.687	830.004	887.115	958.875	869.692	958.925	901.062	983.215	906.327		84.8758	84.8569	88.762	81.2893	88.0494	95.8628	86.6552	96.2722
	BPAG_0000052601	1719	IPR025261: Domain of unknown function DUF4210; IPR033473: Protein FAM214/SPAC3H8.04, C-terminal	-	-	-	-		Bm12918a	Y	WBGene00233179	Bm12918	Bm12918 [Source:UniProtKB/TrEMBL;Acc:A0A5S6P9I2]	0	93.9	572		599	654	736	565	732	993	901	827	883	844	791		678.768	638.325	730.04	609.029	836.814	800.137	851.731	781.311	789.323	862.613	846.404		28.8852	27.1923	31.691	26.1282	36.3827	35.0406	37.175	34.3605
	BPAG_0000052701	1572	IPR000687: RIO kinase; IPR008266: Tyrosine-protein kinase, active site; IPR011009: Protein kinase-like domain superfamily; IPR017407: Serine/threonine-protein kinase Rio1; IPR018935: RIO kinase, conserved site	GO:0004672 - MF - protein kinase activity; GO:0004674 - MF - protein serine/threonine kinase activity; GO:0005524 - MF - ATP binding; GO:0006468 - BP - protein phosphorylation	01001: Protein kinases; 03008: Ribosome biogenesis in eukaryotes; 03009: Ribosome biogenesis	K07178: RIO kinase 1	-		Bm13939a	Y	WBGene00234200	Bma-riok-1	Serine/threonine-protein kinase RIO1 [Source:UniProtKB/TrEMBL;Acc:A0A4E9FJ75]	0	92.5	523		6561	7722	7590	7010	6186	9115	7466	7127	7184	6838	6287		7434.72	7536.92	7528.53	7556.27	7071.77	7344.66	7057.74	6733.26	6421.86	6988.8	6727.36		345.973	351.093	357.374	354.489	336.215	351.724	336.851	323.805
	BPAG_0000052801	2178	-	-	-	-	-		Bm12919	Y	WBGene00233180	Bm12919	Bm12919 [Source:UniProtKB/TrEMBL;Acc:A0A0K0IWA4]	0	96.4	725		3472	4291	4023	3917	4042	5643	4765	4646	4848	4347	4383		3934.36	4188.16	3990.42	4222.24	4620.77	4547	4504.44	4389.32	4333.68	4442.87	4690		132.144	140.814	136.718	142.966	158.562	157.163	155.17	152.353
	BPAG_0000052901	180	-	-	-	-	-		Bm6557	N	WBGene00226818	Bma-edc-4	Ge1_WD40 domain-containing protein [Source:UniProtKB/TrEMBL;Acc:A0A4E9FH91]	6e-26	92.5	53		589	707	717	515	621	836	695	812	761	629	644		667.436	690.055	711.193	555.132	709.92	673.63	656.995	767.14	680.266	642.872	689.108		271.248	280.732	294.836	227.443	294.767	281.729	273.851	322.191
	BPAG_0000053001	1422	-	GO:0003746 - MF - translation elongation factor activity; GO:0005515 - MF - protein binding; GO:0006414 - BP - translational elongation	03012: Translation factors; 03019: Messenger RNA biogenesis; 05134: Legionellosis	K03233: elongation factor 1-gamma	-		Bm3421a	Y	WBGene00223682	Bma-eef-1G	BMA-EEF-1G, isoform d; BMA-EEF-1G, isoform e [Source:UniProtKB/TrEMBL;Acc:A0A1P6BXP9]	6.1e-290	90.1	453		8058	9057	8726	8488	7383	10509	9040	9005	9332	8239	7779		9131.07	8839.93	8655.33	9149.44	8440.16	8467.91	8545.67	8507.5	8341.98	8420.7	8323.87		469.734	455.229	454.203	474.508	443.602	448.291	450.89	452.287
	BPAG_0000053101	3090	IPR001680: WD40 repeat; IPR015943: WD40/YVTN repeat-like-containing domain superfamily; IPR022100: Minichromosome loss protein Mcl1, middle region	GO:0005515 - MF - protein binding	03036: Chromosome and associated proteins	K11274: chromosome transmission fidelity protein 4	-		Bm3422a	Y	WBGene00223683	Bma-ctf-4	Bm3422 [Source:UniProtKB/TrEMBL;Acc:A0A5S6PK44]	0	95.7	1032		2388	2692	2903	2692	2645	3870	3185	3081	3071	3040	3015		2706.01	2627.48	2879.49	2901.78	3023.73	3118.36	3010.84	2910.78	2745.2	3107.04	3226.18		64.0619	62.2675	69.5381	69.2555	73.1353	75.9715	73.106	71.2136
	BPAG_0000053201	357	-	-	-	-	-		Bm2178a	Y	WBGene00222439	Bma-hot-6	BMA-HOT-6 [Source:UniProtKB/TrEMBL;Acc:A0A0H5S6D1]	2.1e-58	58.1	172		91	112	101	101	57	108	116	79	95	99	79		103.118	109.316	100.182	108.871	65.1618	87.0239	109.657	74.6355	84.9215	101.183	84.5334		21.1299	22.423	20.9405	22.4901	13.6416	18.3507	23.0458	15.8048
	BPAG_0000053301	1446	-	GO:0003735 - MF - structural constituent of ribosome; GO:0005622 - CC - intracellular; GO:0005840 - CC - ribosome; GO:0006355 - BP - regulation of transcription, DNA-templated; GO:0006412 - BP - translation; GO:0015935 - CC - small ribosomal subunit; GO:0017025 - MF - TBP-class protein binding; GO:0070897 - BP - DNA-templated transcriptional preinitiation complex assembly	03021: Transcription machinery; 03022: Basal transcription factors; 05017: Spinocerebellar ataxia; 05203: Viral carcinogenesis	K03124: transcription initiation factor TFIIB	-		Bm13875	Y	WBGene00234136	Bma-ttb-1	TFIIB-type domain-containing protein [Source:UniProtKB/TrEMBL;Acc:A0A4E9FPW2]	6.1e-196	92.5	308		3515	4100	3939	3417	2922	4120	3874	3801	4202	3389	3146		3983.09	4001.73	3907.1	3683.28	3340.4	3319.8	3662.16	3591.01	3756.21	3463.74	3366.36		201.503	202.656	201.628	187.851	172.652	172.833	190.017	187.741
	BPAG_0000053401	654	IPR000727: Target SNARE coiled-coil homology domain; IPR000928: SNAP-25	-	04131: Membrane trafficking; 04721: Synaptic vesicle cycle; 04911: Insulin secretion	K18211: synaptosomal-associated protein 25	-		Bm6333	Y	WBGene00226594	Bm6333	Synaptosomal-associated protein [Source:UniProtKB/TrEMBL;Acc:A0A0H5S736]	7.7e-145	95.9	217		677	727	736	583	532	823	640	657	625	598	496		767.155	709.576	730.04	628.431	608.176	663.155	605.003	620.703	558.694	611.188	530.741		85.8095	79.4514	83.2979	70.8644	69.5014	76.3344	69.4071	71.7493
	BPAG_0000053501	1581	IPR000719: Protein kinase domain; IPR000961: AGC-kinase, C-terminal; IPR001849: Pleckstrin homology domain; IPR008271: Serine/threonine-protein kinase, active site; IPR011009: Protein kinase-like domain superfamily; IPR011993: PH-like domain superfamily; IPR017441: Protein kinase, ATP binding site; IPR017892: Protein kinase, C-terminal	GO:0004672 - MF - protein kinase activity; GO:0004674 - MF - protein serine/threonine kinase activity; GO:0005524 - MF - ATP binding; GO:0006468 - BP - protein phosphorylation	01001: Protein kinases; 01521: EGFR tyrosine kinase inhibitor resistance; 01522: Endocrine resistance; 01524: Platinum drug resistance; 04010: MAPK signaling pathway; 04012: ErbB signaling pathway; 04014: Ras signaling pathway; 04015: Rap1 signaling pathway; 04022: cGMP-PKG signaling pathway; 04024: cAMP signaling pathway; 04062: Chemokine signaling pathway; 04066: HIF-1 signaling pathway; 04068:…	K04456: RAC serine/threonine-protein kinase	-		Bm2161a	Y	WBGene00222422	Bm2161	Non-specific serine/threonine protein kinase [Source:UniProtKB/TrEMBL;Acc:A0A5S6PGK8]	0	97.7	533		1776	2157	2149	2037	2143	3024	2398	2319	2712	2361	2192		2012.51	2105.3	2131.6	2195.74	2449.85	2436.67	2266.87	2190.88	2424.29	2413.07	2345.53		93.1184	97.5131	100.609	102.423	115.811	116.024	107.577	104.761
	BPAG_0000053601	896	-	-	-	-	-		Bm14671	Y	WBGene00235006	Bm14671	Bm14671, isoform a; Bm14671, isoform b [Source:UniProtKB/TrEMBL;Acc:A0A0K0J1C5]	5.7e-162	90.6	286		13	46	30	16	27	41	24	19	24	27	20		14.7312	44.8975	29.757	17.2468	30.8661	33.0369	22.6876	17.9503	21.4539	27.5954	21.4009		1.20271	3.6694	2.47826	1.41955	2.57463	2.77571	1.89979	1.51452
	BPAG_0000053701	972	IPR004843: Calcineurin-like phosphoesterase domain, ApaH type; IPR006186: Serine/threonine-specific protein phosphatase/bis(5-nucleosyl)-tetraphosphatase; IPR029052: Metallo-dependent phosphatase-like; IPR031675: Serine-threonine protein phosphatase, N-terminal	GO:0016787 - MF - hydrolase activity	01009: Protein phosphatases and associated proteins; 03015: mRNA surveillance pathway; 03019: Messenger RNA biogenesis; 03021: Transcription machinery; 03041: Spliceosome; 04022: cGMP-PKG signaling pathway; 04024: cAMP signaling pathway; 04113: Meiosis - yeast; 04114: Oocyte meiosis; 04218: Cellular senescence; 04261: Adrenergic signaling in cardiomyocytes; 04270: Vascular smooth muscle contracti…	K06269: serine/threonine-protein phosphatase PP1 catalytic subunit	-		Bm12493	Y	WBGene00232754	Bm12493	Serine/threonine-protein phosphatase [Source:UniProtKB/TrEMBL;Acc:A0A4E9FQH1]	1.7e-237	96.9	323		235	259	238	208	215	262	278	224	293	182	237		266.295	252.792	236.073	224.209	245.786	211.114	262.798	211.625	261.916	186.014	253.6		20.0413	19.0449	18.1236	17.0112	18.8987	16.3506	20.2852	16.4593
	BPAG_0000053801	267	-	-	-	-	-		Bm479	Y	WBGene00220740	Bm479	Bm479 [Source:UniProtKB/TrEMBL;Acc:A0A0J9XVR1]	4.9e-54	90.9	88		807	955	813	779	647	908	850	837	907	708	670		914.467	932.111	806.416	839.705	739.643	731.646	803.52	790.759	810.777	723.614	716.929		250.545	255.645	225.379	231.934	207.039	206.287	225.792	223.895
	BPAG_0000053901	1284	IPR004274: FCP1 homology domain; IPR023214: HAD superfamily; IPR036412: HAD-like superfamily	-	02000: Transporters; 03029: Mitochondrial biogenesis	K17496: mitochondrial import inner membrane translocase subunit TIM50	-		Bm5888	Y	WBGene00226149	Bma-scpl-4	Mitochondrial import inner membrane translocase subunit TIM50 [Source:UniProtKB/TrEMBL;Acc:A0A4E9FRZ1]	3.7e-314	98.1	427		2579	2936	2746	2544	2323	3518	2918	2989	2720	2502	2431		2922.44	2865.63	2723.76	2742.25	2655.63	2834.72	2758.44	2823.87	2431.44	2557.18	2601.28		166.499	163.432	158.296	157.503	154.577	166.199	161.184	166.261
	BPAG_0000054001	1092	IPR007484: Peptidase M28; IPR037457: M28 Zn-Peptidase Glutaminyl Cyclase	GO:0016603 - MF - glutaminyl-peptide cyclotransferase activity	01002: Peptidases and inhibitors	K00683: glutaminyl-peptide cyclotransferase	M28A		Bm4681	Y	WBGene00224942	Bm4681	Peptidase_M28 domain-containing protein [Source:UniProtKB/TrEMBL;Acc:A0A4E9FPW9]	2.8e-261	96.7	363		665	815	884	784	791	1117	1010	1021	1113	870	873		753.557	795.467	876.841	845.094	904.262	900.053	954.77	964.593	994.923	889.186	934.148		50.4805	53.3433	59.9189	57.073	61.889	62.0481	65.5995	66.7779
	BPAG_0000054101	2061	-	GO:0005267 - MF - potassium channel activity; GO:0016020 - CC - membrane; GO:0071805 - BP - potassium ion transmembrane transport	-	-	-		Bm3697	Y	WBGene00223958	Bma-twk-12	BMA-TWK-12 [Source:UniProtKB/TrEMBL;Acc:A0A0H5SKM2]	0	99.1	660		187	143	199	153	157	218	211	169	166	168	141		211.903	139.573	197.388	164.923	179.481	175.659	199.462	159.663	148.389	171.705	150.876		7.52121	4.9591	7.14676	5.90134	6.50851	6.41618	7.26116	5.8565
	BPAG_0000054201	366	-	-	-	-	-		Bm9957	N	WBGene00230218	Bm9957	1-phosphatidylinositol 4,5-bisphosphate phosphodiesterase [Source:UniProtKB/TrEMBL;Acc:A0A4E9FNG0]	8.2e-60	97.9	94		32	21	38	31	46	54	47	42	53	37	40		36.2614	20.4967	37.6923	33.4157	52.5867	43.512	44.4299	39.6796	47.3773	37.816	42.8017		7.24758	4.10094	7.68487	6.73315	10.7383	8.94975	9.10791	8.19592
	BPAG_0000054301	2981	-	GO:0004435 - MF - phosphatidylinositol phospholipase C activity; GO:0005509 - MF - calcium ion binding; GO:0006629 - BP - lipid metabolic process; GO:0007165 - BP - signal transduction; GO:0008081 - MF - phosphoric diester hydrolase activity; GO:0035556 - BP - intracellular signal transduction	00562: Inositol phosphate metabolism; 04015: Rap1 signaling pathway; 04020: Calcium signaling pathway; 04022: cGMP-PKG signaling pathway; 04062: Chemokine signaling pathway; 04070: Phosphatidylinositol signaling system; 04071: Sphingolipid signaling pathway; 04072: Phospholipase D signaling pathway; 04131: Membrane trafficking; 04261: Adrenergic signaling in cardiomyocytes; 04270: Vascular smooth…	K05858: phosphatidylinositol phospholipase C, beta	-		Bm9957	Y	WBGene00230218	Bm9957	1-phosphatidylinositol 4,5-bisphosphate phosphodiesterase [Source:UniProtKB/TrEMBL;Acc:A0A4E9FNG0]	0	86.6	1041		519	594	574	454	479	590	563	564	577	417	525		588.114	579.763	569.352	489.379	547.587	475.409	532.214	532.841	515.787	426.196	561.773		14.4321	14.2419	14.2523	12.1069	13.7288	12.0057	13.3952	13.5128
	BPAG_0000054401	1056	-	GO:0003677 - MF - DNA binding; GO:0006355 - BP - regulation of transcription, DNA-templated; GO:0043565 - MF - sequence-specific DNA binding	03000: Transcription factors; 04950: Maturity onset diabetes of the young	K08029: homeobox protein Nkx-2.2	-		Bm3698a	Y	WBGene00223959	Bma-ceh-22	Homeobox domain-containing protein [Source:UniProtKB/TrEMBL;Acc:A0A4E9FZR5]	3.3e-247	98	351		42	43	58	37	34	51	47	35	41	34	31		47.5931	41.9694	57.5303	39.8833	38.8684	41.0946	44.4299	33.0664	36.6503	34.7498	33.1713		3.29693	2.91038	4.06535	2.78532	2.7509	2.92957	3.15672	2.36719
	BPAG_0000054501	1008	-	-	-	-	-		Bm4132	Y	WBGene00224393	Bm4132	Bm4132, isoform e [Source:UniProtKB/TrEMBL;Acc:A0A1I9G2L6]	2.6e-236	90.9	364		126	106	129	197	79	148	169	95	110	171	110		142.779	103.459	127.955	212.352	90.3119	119.255	159.759	89.7516	98.3302	174.771	117.705		10.3618	7.51606	9.47247	15.5361	6.69617	8.90634	11.8913	6.73121
	BPAG_0000054601	567	IPR010480: Pepsin inhibitor-3-like repeated domain; IPR038412: Pepsin inhibitor-3 domain superfamily	-	-	-	-		Bm9956	Y	WBGene00230217	Bm9956	Bm9956, isoform b [Source:UniProtKB/TrEMBL;Acc:A0A1P6CH61]	4e-102	97.2	144		579	600	492	464	520	605	584	613	613	406	476		656.105	585.62	488.016	500.158	594.458	487.495	552.065	579.134	547.967	414.954	509.341		84.6486	75.6333	64.2268	65.0538	78.3574	64.7247	73.0519	77.216
	BPAG_0000054701	264	-	-	-	-	-		Bm9955	N	WBGene00230216	Bm9955	Bm9955 [Source:UniProtKB/TrEMBL;Acc:A0A0H5S8K7]	5.3e-55	98.9	87		51	85	91	86	130	210	156	152	173	136	140		57.7916	82.9628	90.2631	92.7017	148.615	169.213	147.469	143.603	154.647	138.999	149.806		16.0137	23.0123	25.5136	25.896	42.0726	48.2518	41.9105	41.1215
	BPAG_0000054801	1110	IPR011013: Galactose mutarotase-like domain superfamily; IPR011682: Glycosyl hydrolase family 38, C-terminal	GO:0003824 - MF - catalytic activity; GO:0004559 - MF - alpha-mannosidase activity; GO:0005975 - BP - carbohydrate metabolic process; GO:0006013 - BP - mannose metabolic process; GO:0030246 - MF - carbohydrate binding	00510: N-Glycan biosynthesis; 00513: Various types of N-glycan biosynthesis	K01231: alpha-mannosidase II	-		Bm4197a	Y	WBGene00224458	Bm4197	-	5.9e-223	76.5	459		55	71	91	77	78	113	95	101	74	109	87		62.3243	69.2983	90.2631	83.0004	89.1687	91.0528	89.8051	95.4201	66.1494	111.404	93.0938		4.10737	4.57173	6.0681	5.51449	6.00387	6.17524	6.07019	6.49872
	BPAG_0000054901	6039	IPR001005: SANT/Myb domain; IPR009057: Homeobox-like domain superfamily; IPR017877: Myb-like domain; IPR017884: SANT domain	GO:0003677 - MF - DNA binding	01009: Protein phosphatases and associated proteins; 01522: Endocrine resistance; 04919: Thyroid hormone signaling pathway; 05202: Transcriptional misregulation in cancer	K04650: nuclear receptor co-repressor 1	-		Bm9098a	Y	WBGene00229359	Bma-gei-8	Myb-like DNA-binding domain containing protein [Source:UniProtKB/TrEMBL;Acc:A0A4E9F4Q7]	0	93.5	1972		2859	3093	3014	3057	2705	3580	3197	2928	3719	2988	3056		3239.73	3018.87	2989.59	3295.22	3092.33	2884.68	3022.18	2766.24	3324.45	3053.9	3270.05		39.244	36.6066	36.9413	40.2409	38.2703	35.9597	37.5474	34.6287
	BPAG_0000055001	270	-	-	-	-	-		Bm3986	N	WBGene00224247	Bm3986	Bm3986 [Source:UniProtKB/TrEMBL;Acc:A0A0K0JCP3]	1.5e-29	73.6	72		25	22	11	19	23	15	22	26	20	21	20		28.3292	21.4727	10.9109	20.4806	26.2933	12.0867	20.797	24.5636	17.8782	21.4631	21.4009		7.67539	5.82376	3.01553	5.59406	7.2782	3.36997	5.77911	6.87764
	BPAG_0000055101	201	-	-	-	-	-		Bm17376	Y	WBGene00268519	Bm17376	-	1.4e-41	97	66		7	12	11	7	8	7	9	11	11	10	13		7.93218	11.7124	10.9109	7.54549	9.14551	5.64044	8.50785	10.3923	9.83302	10.2205	13.9106		2.88686	4.26707	4.05071	2.76847	3.40059	2.11252	3.17576	3.90865
	BPAG_0000055201	305	-	-	-	-	-		Bm6066a	N	WBGene00226327	Bm6066	ANK_REP_REGION domain-containing protein [Source:UniProtKB/TrEMBL;Acc:A0A5S6PRE0]	1.4e-56	100	94		97	101	82	141	86	150	110	102	144	119	98		109.917	98.5793	81.3359	151.988	98.3142	120.867	103.985	96.3648	128.723	121.624	104.864		26.3631	23.6683	19.8998	36.7499	24.0912	29.8325	25.5797	23.8853
	BPAG_0000055301	2646	-	GO:0005515 - MF - protein binding	04131: Membrane trafficking	K21440: -	-		Bm6066a	Y	WBGene00226327	Bm6066	ANK_REP_REGION domain-containing protein [Source:UniProtKB/TrEMBL;Acc:A0A5S6PRE0]	0	99.3	881		621	683	697	696	648	975	787	778	701	547	604		703.698	666.63	691.355	750.237	740.786	785.633	743.965	735.018	626.632	559.063	646.306		19.4548	18.4491	19.4974	20.9101	20.924	22.3518	21.0953	21
	BPAG_0000055401	798	IPR000276: G protein-coupled receptor, rhodopsin-like; IPR017452: GPCR, rhodopsin-like, 7TM	GO:0004930 - MF - G-protein coupled receptor activity; GO:0007186 - BP - G-protein coupled receptor signaling pathway; GO:0016021 - CC - integral component of membrane	04020: Calcium signaling pathway; 04030: G protein-coupled receptors; 04080: Neuroactive ligand-receptor interaction; 04725: Cholinergic synapse; 04742: Taste transduction; 04810: Regulation of actin cytoskeleton; 04911: Insulin secretion; 04970: Salivary secretion; 04971: Gastric acid secretion; 04972: Pancreatic secretion	K04131: muscarinic acetylcholine receptor M3	-		Bm4179	Y	WBGene00224440	Bma-gar-2	G-protein-linked acetylcholine receptor protein 2, putative [Source:UniProtKB/TrEMBL;Acc:A0A4E9FB24]	1.4e-186	100	262		43	44	33	23	24	39	22	34	43	38	36		48.7262	42.9454	32.7328	24.7923	27.4365	31.4253	20.797	32.1216	38.4382	38.838	38.5216		4.46673	3.94089	3.06087	2.2912	2.56962	2.96456	1.95534	3.04303
	BPAG_0000055501	636	IPR000276: G protein-coupled receptor, rhodopsin-like; IPR017452: GPCR, rhodopsin-like, 7TM	GO:0004930 - MF - G-protein coupled receptor activity; GO:0007186 - BP - G-protein coupled receptor signaling pathway; GO:0016021 - CC - integral component of membrane	04020: Calcium signaling pathway; 04030: G protein-coupled receptors; 04080: Neuroactive ligand-receptor interaction; 04725: Cholinergic synapse; 04742: Taste transduction; 04810: Regulation of actin cytoskeleton; 04911: Insulin secretion; 04970: Salivary secretion; 04971: Gastric acid secretion; 04972: Pancreatic secretion	K04131: muscarinic acetylcholine receptor M3	-		Bm4179	N	WBGene00224440	Bma-gar-2	G-protein-linked acetylcholine receptor protein 2, putative [Source:UniProtKB/TrEMBL;Acc:A0A4E9FB24]	3.8e-132	100	188		21	13	17	21	15	23	12	11	17	19	17		23.7965	12.6884	16.8623	22.6365	17.1478	18.5329	11.3438	10.3923	15.1965	19.419	18.1907		2.73707	1.46094	1.97845	2.62482	2.01509	2.19366	1.33822	1.23528
	BPAG_0000055601	225	-	-	-	-	-		-	-	-	-	-	-	-	-		3	1	5	0	2	5	2	0	2	2	4		3.39951	0.976033	4.95951	0	2.28638	4.02889	1.89063	0	1.78782	2.04411	4.28017		1.10526	0.31766	1.64483	0	0.759464	1.34799	0.630448	0
	BPAG_0000055701	885	-	-	03021: Transcription machinery; 05202: Transcriptional misregulation in cancer	K15188: cyclin T	-		Bm4079	N	WBGene00224340	Bma-cit-1.1	-	1e-161	85.7	286		535	661	628	638	631	948	677	716	757	680	676		606.245	645.158	622.914	687.717	721.352	763.877	639.98	676.443	676.691	694.996	723.349		50.1112	53.383	52.5231	57.3079	60.918	64.9775	54.2559	57.7829
	BPAG_0000055801	1766	-	-	03021: Transcription machinery; 05202: Transcriptional misregulation in cancer	K15188: cyclin T	-		Bm4079	Y	WBGene00224340	Bma-cit-1.1	-	7.5e-316	84.1	593		3096	3634	3632	3342	3101	4340	3677	3510	3819	3189	3173		3508.29	3546.9	3602.59	3602.43	3545.03	3497.07	3475.93	3316.08	3413.85	3259.33	3395.25		145.323	147.075	152.226	150.436	150.027	149.072	147.674	141.954
	BPAG_0000055901	231	-	-	-	-	-		Bm7351a	N	WBGene00227612	Bma-zfh-2	BMA-ZFH-2, isoform c [Source:UniProtKB/TrEMBL;Acc:A0A0K0JS06]	1.6e-12	100	31		0	3	1	0	0	0	0	2	0	2	0		0	2.9281	0.991902	0	0	0	0	1.88951	0	2.04411	0		0	0.928227	0.320422	0	0	0	0	0.618369
	BPAG_0000056001	293	-	-	-	-	-		-	-	-	-	-	-	-	-		0	0	0	0	0	1	0	0	1	0	0		0	0	0	0	0	0.805777	0	0	0.893911	0	0		0	0	0	0	0	0.207029	0	0
	BPAG_0000056101	228	-	-	-	-	-		-	-	-	-	-	-	-	-		1	0	0	0	0	1	1	0	0	0	0		1.13317	0	0	0	0	0.805777	0.945317	0	0	0	0		0.363571	0	0	0	0	0.26605	0.311076	0
	BPAG_0000056201	4308	-	GO:0003676 - MF - nucleic acid binding; GO:0003677 - MF - DNA binding; GO:0006355 - BP - regulation of transcription, DNA-templated; GO:0008270 - MF - zinc ion binding; GO:0043565 - MF - sequence-specific DNA binding	03000: Transcription factors; 04550: Signaling pathways regulating pluripotency of stem cells	K09378: AT-binding transcription factor 1	-		Bm7351a	Y	WBGene00227612	Bma-zfh-2	BMA-ZFH-2, isoform c [Source:UniProtKB/TrEMBL;Acc:A0A0K0JS06]	0	98.6	1429		524	534	639	576	635	963	579	654	900	754	760		593.78	521.201	633.825	620.886	725.925	775.963	547.339	617.869	804.52	770.628	813.233		10.0828	8.85952	10.9789	10.6288	12.5938	13.5597	9.53245	10.8426
	BPAG_0000056301	1827	IPR009060: UBA-like superfamily; IPR010422: Coiled-coil domain-containing protein 124; IPR015940: Ubiquitin-associated domain	GO:0005515 - MF - protein binding	-	-	-		Bm18185	Y	WBGene00269325	Bm18185	UBA domain-containing protein [Source:UniProtKB/TrEMBL;Acc:A0A5S6PFD3]	3.2e-129	98.5	200		7847	9605	9294	8373	7511	11141	8931	8921	9130	8487	7961		8891.97	9374.79	9218.73	9025.48	8586.49	8977.16	8442.63	8428.14	8161.41	8674.17	8518.61		356.032	375.754	376.529	364.317	351.252	369.899	346.708	348.742
	BPAG_0000056401	609	-	-	-	-	-		Bm12967a	Y	WBGene00233228	Bm12967	Bm12967 [Source:UniProtKB/TrEMBL;Acc:A0A0K0IWF2]	3.6e-125	97.8	185		713	917	798	656	537	816	765	809	856	686	595		807.949	895.022	791.538	707.12	613.892	657.514	723.168	764.305	765.188	701.129	636.676		97.0502	107.621	96.9884	85.6296	75.3385	81.2776	89.0935	94.877
	BPAG_0000056501	2640	IPR002013: SAC domain; IPR022158: Inositol phosphatase	GO:0042578 - MF - phosphoric ester hydrolase activity	00562: Inositol phosphate metabolism; 04070: Phosphatidylinositol signaling system	K21798: -	-		Bm6251	Y	WBGene00226512	Bm6251	SAC domain-containing protein [Source:UniProtKB/TrEMBL;Acc:A0A4E9FIM0]	0	96.3	842		2032	2357	2272	2057	2230	2906	2567	2475	2760	2464	2421		2302.6	2300.51	2253.6	2217.3	2549.31	2341.59	2426.63	2338.26	2467.19	2518.34	2590.57		63.8034	63.8117	63.6999	61.9395	72.1707	66.7713	68.9642	66.9578
	BPAG_0000056601	9792	IPR009543: Vacuolar protein sorting-associated protein 13, SHR-binding domain; IPR026854: Vacuolar protein sorting-associated protein 13, N-terminal domain; IPR031642: VPS13, repeated coiled region; IPR031645: Vacuolar protein sorting-associated protein 13, C-terminal; IPR031646: Vacuolar protein sorting-associated protein 13, second N-terminal domain	-	04131: Membrane trafficking	K19525: -	-		Bm5678a	Y	WBGene00225939	Bm5678	Bm5678 [Source:UniProtKB/TrEMBL;Acc:A0A5S6PQV3]	0	97.9	3238		3922	4359	4528	4101	4506	6156	5233	5364	5071	4632	4801		4444.29	4254.53	4491.33	4420.58	5151.21	4960.36	4946.84	5067.66	4533.02	4734.15	5137.28		33.2017	31.8171	34.227	33.2932	39.3169	38.1351	37.9037	39.1243
	BPAG_0000056701	243	-	-	-	-	-		-	-	-	-	-	-	-	-		6	6	1	6	8	13	7	4	9	11	7		6.79901	5.8562	0.991902	6.46756	9.14551	10.4751	6.61722	3.77901	8.0452	11.2426	7.4903		2.04677	1.76478	0.304599	1.96283	2.81283	3.24515	2.04312	1.17566
	BPAG_0000056801	2412	-	GO:0004842 - MF - ubiquitin-protein transferase activity; GO:0005515 - MF - protein binding; GO:0006511 - BP - ubiquitin-dependent protein catabolic process; GO:0061630 - MF - ubiquitin protein ligase activity	04120: Ubiquitin mediated proteolysis; 04121: Ubiquitin system; 04131: Membrane trafficking; 04144: Endocytosis	K05633: atrophin-1 interacting protein 5 (WW domain containing E3 ubiquitin protein ligase 1)	-		Bm6975	Y	WBGene00227236	Bma-wwp-1	E3 ubiquitin-protein ligase [Source:UniProtKB/TrEMBL;Acc:A0A4E9FIS6]	0	91.9	817		5110	6186	6093	5663	5835	7993	6894	6922	7098	6457	6109		5790.49	6037.74	6043.66	6104.3	6670.51	6440.58	6517.02	6539.58	6344.98	6599.4	6536.89		175.618	183.306	186.977	186.641	206.692	201.016	202.72	204.967
	BPAG_0000056901	900	IPR001594: Palmitoyltransferase, DHHC domain	-	04131: Membrane trafficking	K20029: -	-		Bm2261a	Y	WBGene00222522	Bma-dhhc-7	Palmitoyltransferase [Source:UniProtKB/TrEMBL;Acc:A0A0I9N9A5]	1.1e-223	99.7	299		1551	1877	1823	1579	1406	1925	1802	1702	1816	1664	1480		1757.54	1832.01	1808.24	1702.05	1607.32	1551.12	1703.46	1607.97	1623.34	1700.7	1583.66		142.854	149.062	149.926	139.469	133.476	129.744	142.008	135.066
	BPAG_0000057001	315	-	-	-	-	-		-	-	-	-	-	-	-	-		1	1	1	1	1	3	0	0	1	0	0		1.13317	0.976033	0.991902	1.07793	1.14319	2.41733	0	0	0.893911	0	0		0.263156	0.2269	0.234976	0.252364	0.271237	0.577709	0	0
	BPAG_0000057101	369	-	-	-	-	-		Bm12970	Y	WBGene00233231	Bm12970	-	2.4e-38	92.5	67		9	12	8	13	5	13	8	6	14	9	9		10.1985	11.7124	7.93521	14.013	5.71594	10.4751	7.56254	5.66852	12.5148	9.19848	9.63039		2.02181	2.32434	1.60471	2.80062	1.15772	2.13705	1.53768	1.16133
	BPAG_0000057201	228	-	-	-	-	-		-	-	-	-	-	-	-	-		359	419	411	388	329	426	357	355	428	414	345		406.808	408.958	407.672	418.236	376.109	343.261	337.478	335.387	382.594	423.13	369.165		130.522	131.348	133.426	135.28	123.288	113.337	111.054	111.205
	BPAG_0000057301	279	-	-	-	-	-		-	-	-	-	-	-	-	-		25	25	18	18	28	31	34	34	21	21	21		28.3292	24.4008	17.8542	19.4027	32.0093	24.9791	32.1408	32.1216	18.7721	21.4631	22.4709		7.4278	6.40443	4.77532	5.12868	8.57459	6.73993	8.64324	8.70371
	BPAG_0000057401	810	IPR000239: GPCR kinase; IPR000719: Protein kinase domain; IPR000961: AGC-kinase, C-terminal; IPR011009: Protein kinase-like domain superfamily	GO:0004672 - MF - protein kinase activity; GO:0004674 - MF - protein serine/threonine kinase activity; GO:0004703 - MF - G-protein coupled receptor kinase activity; GO:0005524 - MF - ATP binding; GO:0006468 - BP - protein phosphorylation; GO:0007165 - BP - signal transduction	01001: Protein kinases; 04062: Chemokine signaling pathway; 04144: Endocytosis; 04341: Hedgehog signaling pathway - fly; 05032: Morphine addiction	K08291: G protein-coupled receptor kinase	-		Bm17977	Y	WBGene00269119	Bma-grk-1.1	G protein-coupled receptor kinase [Source:UniProtKB/TrEMBL;Acc:A0A5S6PET8]	9.8e-195	94.9	275		1426	1662	1670	1565	1476	1892	1622	1717	1707	1588	1546		1615.9	1622.17	1656.48	1686.96	1687.35	1524.53	1533.3	1622.14	1525.91	1623.02	1654.29		145.935	146.653	152.604	153.591	155.69	141.688	142.026	151.396
	BPAG_0000057501	201	-	-	-	-	-		-	-	-	-	-	-	-	-		1	1	2	2	1	5	0	0	0	1	0		1.13317	0.976033	1.9838	2.15585	1.14319	4.02889	0	0	0	1.02205	0		0.412409	0.355589	0.736492	0.790991	0.425073	1.50894	0	0
	BPAG_0000057601	1698	IPR002909: IPT domain; IPR013783: Immunoglobulin-like fold; IPR014756: Immunoglobulin E-set; IPR018350: Transcription factor COE, conserved site; IPR032200: Transcription factor COE, DNA-binding domain; IPR032201: Transcription factor COE, helix-loop-helix domain; IPR036638: Helix-loop-helix DNA-binding domain superfamily; IPR038173: Transcription factor COE, DNA-binding domain superfamily	GO:0003677 - MF - DNA binding; GO:0046983 - MF - protein dimerization activity	03000: Transcription factors	K09103: early B-cell factor	-		Bm6296a	Y	WBGene00226557	Bma-unc-3	IPT/TIG domain-containing protein [Source:UniProtKB/TrEMBL;Acc:A0A5S6PS92]	0	92.5	509		161	212	227	153	197	302	248	218	212	163	199		182.44	206.919	225.162	164.923	225.208	243.345	234.439	205.956	189.509	166.595	212.939		7.85982	8.92366	9.89515	7.16294	9.91262	10.7887	10.359	9.16956
	BPAG_0000057701	1347	IPR004838: Aminotransferases, class-I, pyridoxal-phosphate-binding site; IPR004839: Aminotransferase, class I/classII; IPR005957: Tyrosine aminotransferase; IPR005958: Tyrosine/nicotianamine aminotransferase; IPR015421: Pyridoxal phosphate-dependent transferase, major domain; IPR015422: Pyridoxal phosphate-dependent transferase domain 1; IPR015424: Pyridoxal phosphate-dependent transferase	GO:0003824 - MF - catalytic activity; GO:0004838 - MF - L-tyrosine:2-oxoglutarate aminotransferase activity; GO:0006520 - BP - cellular amino acid metabolic process; GO:0008483 - MF - transaminase activity; GO:0009058 - BP - biosynthetic process; GO:0009072 - BP - aromatic amino acid family metabolic process; GO:0030170 - MF - pyridoxal phosphate binding	00130: Ubiquinone and other terpenoid-quinone biosynthesis; 00270: Cysteine and methionine metabolism; 00350: Tyrosine metabolism; 00360: Phenylalanine metabolism; 00400: Phenylalanine, tyrosine and tryptophan biosynthesis; 00401: Novobiocin biosynthesis; 00950: Isoquinoline alkaloid biosynthesis; 00960: Tropane, piperidine and pyridine alkaloid biosynthesis; 01007: Amino acid related enzymes	K00815: tyrosine aminotransferase	-		Bm4026	Y	WBGene00224287	Bma-tatn-1	Aminotran_1_2 domain-containing protein [Source:UniProtKB/TrEMBL;Acc:A0A4E9EV82]	1.1e-214	99.3	297		250	287	286	228	234	340	300	319	315	218	257		283.292	280.121	283.684	245.767	267.506	273.964	283.595	301.376	281.582	222.808	275.001		15.385	15.2286	15.7157	13.4557	14.8425	15.3112	15.7963	16.9143
	BPAG_0000057801	279	-	-	-	-	-		-	-	-	-	-	-	-	-		2	1	1	0	1	2	0	2	1	0	0		2.26634	0.976033	0.991902	0	1.14319	1.61155	0	1.88951	0.893911	0	0		0.594224	0.256177	0.265296	0	0.306236	0.434834	0	0.511983
	BPAG_0000057901	204	-	-	-	-	-		-	-	-	-	-	-	-	-		0	1	1	2	1	1	1	0	1	1	1		0	0.976033	0.991902	2.15585	1.14319	0.805777	0.945317	0	0.893911	1.02205	1.07004		0	0.35036	0.362831	0.779359	0.418822	0.29735	0.347674	0
	BPAG_0000058001	280	-	-	-	-	-		-	-	-	-	-	-	-	-		41	35	30	33	33	65	44	43	55	40	50		46.4599	34.1611	29.757	35.5716	37.7252	52.3755	41.594	40.6244	49.1651	40.8821	53.5022		12.1381	8.93418	7.93044	9.369	10.0697	14.0816	11.1454	10.9683
	BPAG_0000058101	849	-	GO:0046983 - MF - protein dimerization activity	03000: Transcription factors	K09114: MAX dimerization protein	-		Bm5193a	Y	WBGene00225454	Bma-mdl-1	BMA-MDL-1, isoform a [Source:UniProtKB/TrEMBL;Acc:A0A0K0JHW3]	1.4e-195	98.6	282		1406	1677	1682	1291	1311	1791	1631	1549	1624	1407	1343		1593.24	1636.81	1668.38	1391.6	1498.72	1443.15	1541.81	1463.42	1451.71	1438.03	1437.07		137.278	141.179	146.64	120.88	131.933	127.963	136.254	130.309
	BPAG_0000058201	1911	-	GO:0016021 - CC - integral component of membrane	-	-	-		Bm18578	Y	WBGene00303430	Bm18578	-	0	86.3	635		2249	2654	2706	2293	2295	3320	2898	2918	2742	2542	2409		2548.5	2590.39	2684.09	2471.69	2623.62	2675.18	2739.53	2756.79	2451.1	2598.06	2577.73		97.5558	99.2625	104.81	95.3852	102.608	105.384	107.557	109.057
	BPAG_0000058301	801	-	-	-	-	-		Bm8569b	Y	WBGene00228830	Bm8569	-	4.9e-155	86.9	259		1059	1262	1241	1112	1064	1478	1366	1304	1486	1125	1208		1200.03	1231.75	1230.95	1198.65	1216.35	1190.94	1291.3	1231.96	1328.35	1149.81	1292.61		109.594	112.609	114.676	110.359	113.493	111.928	120.954	116.272
	BPAG_0000058401	363	-	-	-	-	-		Bm17978	Y	WBGene00269120	Bm17978	-	3e-30	49.2	122		0	8	12	9	4	9	6	3	4	8	4		0	7.80826	11.9028	9.70134	4.57276	7.25199	5.6719	2.83426	3.57564	8.17643	4.28017		0	1.57517	2.44686	1.97094	0.941484	1.50395	1.17232	0.590261
	BPAG_0000058501	3363	IPR000299: FERM domain; IPR014352: FERM/acyl-CoA-binding protein superfamily; IPR018979: FERM, N-terminal; IPR018980: FERM, C-terminal PH-like domain; IPR019748: FERM central domain; IPR019749: Band 4.1 domain; IPR021774: Domain of unknown function DUF3338; IPR029071: Ubiquitin-like domain superfamily; IPR035963: FERM superfamily, second domain	GO:0005856 - CC - cytoskeleton	-	-	-		Bm3169a	Y	WBGene00223430	Bm3169	Bm3169, isoform b [Source:UniProtKB/TrEMBL;Acc:A0A5S6PJK7]	0	94.5	1114		2968	3478	3761	3553	3506	4854	4148	3958	4073	3826	3603		3363.24	3394.64	3730.54	3829.87	4008.02	3911.24	3921.18	3739.33	3640.9	3910.38	3855.37		73.1579	73.9175	82.7772	83.9858	89.0727	87.553	87.481	84.0579
	BPAG_0000058601	1248	-	GO:0046872 - MF - metal ion binding	04121: Ubiquitin system	K15687: E3 ubiquitin-protein ligase makorin	-		Bm6853	Y	WBGene00227114	Bma-lep-2	Bm6853 [Source:UniProtKB/TrEMBL;Acc:A0A0H5S2M9]	5.5e-280	99	385		1445	1698	1757	1666	1514	2084	1908	1880	2029	1726	1647		1637.43	1657.3	1742.77	1795.83	1730.79	1679.24	1803.67	1776.14	1813.75	1764.06	1762.36		95.9793	97.2451	104.206	106.12	103.65	101.293	108.434	107.59
	BPAG_0000058701	1227	IPR018556: Domain of unknown function DUF2013	-	-	-	-		Bm6852a	Y	WBGene00227113	Bm6852	DUF2013 domain-containing protein [Source:UniProtKB/TrEMBL;Acc:A0A4E9EVS8]	2.6e-262	93.6	408		478	580	577	479	475	704	589	634	530	531	537		541.655	566.099	572.327	516.327	543.015	567.267	556.792	598.974	473.773	542.71	574.613		32.2929	33.7853	34.8069	31.0333	33.0757	34.8038	34.0465	36.9041
	BPAG_0000058801	1881	-	GO:0004672 - MF - protein kinase activity; GO:0005524 - MF - ATP binding; GO:0006468 - BP - protein phosphorylation	01001: Protein kinases; 01524: Platinum drug resistance; 03320: PPAR signaling pathway; 04011: MAPK signaling pathway - yeast; 04068: FoxO signaling pathway; 04071: Sphingolipid signaling pathway; 04131: Membrane trafficking; 04140: Autophagy - animal; 04150: mTOR signaling pathway; 04151: PI3K-Akt signaling pathway; 04152: AMPK signaling pathway; 04210: Apoptosis; 04510: Focal adhesion; 04660: T…	K06276: 3-phosphoinositide dependent protein kinase-1	-		Bm4698a	Y	WBGene00224959	Bma-pdk-1	Protein kinase domain-containing protein [Source:UniProtKB/TrEMBL;Acc:A0A4E9EV97]	0	87.8	646		3622	4461	4227	3900	3592	4967	4381	4467	4814	4372	4028		4104.34	4354.08	4192.77	4203.91	4106.33	4002.3	4141.43	4220.21	4303.29	4468.42	4310.13		159.619	169.507	166.333	164.821	163.158	160.178	165.191	169.612
	BPAG_0000058901	747	IPR003131: Potassium channel tetramerisation-type BTB domain; IPR011333: SKP1/BTB/POZ domain superfamily	GO:0051260 - BP - protein homooligomerization	-	-	-		Bm4600a	Y	WBGene00224861	Bm4600	BTB_2 domain-containing protein [Source:UniProtKB/TrEMBL;Acc:A0A4E9EY90]	2.3e-120	80.3	223		48	53	65	65	59	76	82	66	54	74	47		54.3921	51.7297	64.4736	70.0652	67.4481	61.2391	77.516	62.3537	48.2712	75.632	50.292		5.32654	5.07108	6.44061	6.9172	6.74825	6.1715	7.78565	6.31034
	BPAG_0000059001	7926	IPR007196: CCR4-Not complex component, Not1, C-terminal; IPR016021: MIF4G-like domain superfamily; IPR024557: CCR4-Not complex, Not1 subunit, domain of unknown function DUF3819; IPR032191: CCR4-NOT transcription complex subunit 1, CAF1-binding domain; IPR032193: CCR4-NOT transcription complex subunit 1, TTP binding domain; IPR032194: CCR4-NOT transcription complex subunit 1, HEAT repeat; IPR03853…	-	03018: RNA degradation; 03019: Messenger RNA biogenesis	K12604: CCR4-NOT transcription complex subunit 1	-		Bm7696a	Y	WBGene00227957	Bma-let-711	BMA-LET-711 [Source:UniProtKB/TrEMBL;Acc:A0A5S6PVE5]	0	97	2668		4233	4865	5085	4949	4951	6810	5960	5879	6495	5520	5375		4796.7	4748.4	5043.82	5334.66	5659.93	5487.34	5634.09	5554.2	5805.95	5641.73	5751.48		44.2709	43.8706	47.4866	49.6365	53.3702	52.1184	53.3327	52.976
	BPAG_0000059101	1368	IPR000717: Proteasome component (PCI) domain; IPR036390: Winged helix DNA-binding domain superfamily	GO:0005515 - MF - protein binding	03050: Proteasome; 03051: Proteasome; 05169: Epstein-Barr virus infection	K03036: 26S proteasome regulatory subunit N6	-		Bm13851	Y	WBGene00234112	Bma-rpn-6.1	Proteasome regulatory particle, non-atpase-like protein 6, putative [Source:UniProtKB/TrEMBL;Acc:A0A4E9F568]	2.4e-286	92.1	455		3715	4516	4474	4154	4009	5729	4913	4651	5273	4360	4459		4209.72	4407.76	4437.77	4477.71	4583.04	4616.3	4644.34	4394.05	4713.59	4456.15	4771.32		225.111	235.946	242.072	241.389	250.386	254.033	254.72	242.823
	BPAG_0000059201	2949	-	GO:0005515 - MF - protein binding; GO:0030008 - CC - TRAPP complex; GO:0048193 - BP - Golgi vesicle transport	03040: Spliceosome; 03041: Spliceosome	K12821: pre-mRNA-processing factor 40	-		Bm18140a	Y	WBGene00269280	Bm18140	Bm7621, isoform a; Bm7621, isoform d [Source:UniProtKB/TrEMBL;Acc:A0A1P6BRW8]	0	98.1	753		7823	8362	8015	8140	7821	10482	8748	8648	8577	7645	7486		8864.78	8161.58	7950.09	8774.32	8940.88	8446.16	8269.63	8170.23	7667.07	7813.6	8010.34		219.899	202.666	201.17	219.425	226.593	215.609	210.395	209.445
	BPAG_0000059301	420	IPR023611: Ribosomal protein S23/S25, mitochondrial	GO:0003735 - MF - structural constituent of ribosome; GO:0005840 - CC - ribosome; GO:0006412 - BP - translation	03011: Ribosome	K17402: small subunit ribosomal protein S23, mitochondrial	-		Bm7622	Y	WBGene00227883	Bma-mrps-23	MRP-S23 domain-containing protein [Source:UniProtKB/TrEMBL;Acc:A0A4E9F2Q6]	7.6e-100	97.8	139		1010	1154	1013	982	869	1225	1053	1017	1154	944	913		1144.5	1126.34	1004.8	1058.52	993.431	987.077	995.419	960.814	1031.57	964.818	976.949		199.341	196.382	178.523	185.866	176.779	176.923	177.82	172.942
	BPAG_0000059401	1092	-	-	04068: FoxO signaling pathway; 04152: AMPK signaling pathway; 04211: Longevity regulating pathway; 04213: Longevity regulating pathway - multiple species; 04371: Apelin signaling pathway; 04530: Tight junction; 04710: Circadian rhythm; 04714: Thermogenesis; 04910: Insulin signaling pathway; 04920: Adipocytokine signaling pathway; 04921: Oxytocin signaling pathway; 04922: Glucagon signaling pathwa…	K07200: 5'-AMP-activated protein kinase, regulatory gamma subunit	-		Bm7287	Y	WBGene00227548	Bma-aakg-1	BMA-AAKG-1 [Source:UniProtKB/TrEMBL;Acc:A0A0J9Y2D3]	4.7e-246	96.6	352		626	746	738	765	673	959	825	865	1013	878	833		709.364	728.12	732.023	824.614	769.366	772.74	779.887	817.212	905.532	897.363	891.346		47.5199	48.8271	50.0228	55.6899	52.6565	53.2714	53.5837	56.5748
	BPAG_0000059501	894	-	-	-	-	-		Bm7287	N	WBGene00227548	Bma-aakg-1	BMA-AAKG-1 [Source:UniProtKB/TrEMBL;Acc:A0A0J9Y2D3]	8e-195	95.4	284		328	433	435	387	446	533	529	517	624	541	458		371.679	422.622	431.477	417.158	509.862	429.479	500.073	488.437	557.8	552.931	490.08		30.4131	34.6175	36.0152	34.4121	42.6243	36.1649	41.9682	41.3031
	BPAG_0000059601	355	-	-	-	-	-		Bm10878	Y	WBGene00231139	Bm10878	Bm10878 [Source:UniProtKB/TrEMBL;Acc:A0A0H5SCC2]	7.5e-12	96.2	26		9	16	21	17	17	17	16	10	7	9	12		10.1985	15.6165	20.8299	18.3248	19.4342	13.6982	15.1251	9.44753	6.25738	9.19848	12.8405		2.10154	3.22134	4.3785	3.80678	4.09148	2.90482	3.19664	2.01188
	BPAG_0000059701	576	-	-	-	-	-		Bm10879a	Y	WBGene00231140	Bm10879	Bm10879 [Source:UniProtKB/TrEMBL;Acc:A0A0K0IPU8]	7.7e-132	96.3	191		74	77	80	54	62	63	64	62	74	51	54		83.8545	75.1545	79.3521	58.208	70.8777	50.764	60.5003	58.5747	66.1494	52.1247	57.7823		10.6496	9.55461	10.2802	7.45262	9.19664	6.63462	7.8806	7.68774
	BPAG_0000059801	4611	-	GO:0005515 - MF - protein binding	01009: Protein phosphatases and associated proteins; 04015: Rap1 signaling pathway; 04062: Chemokine signaling pathway; 04080: Neuroactive ligand-receptor interaction; 04144: Endocytosis; 04360: Axon guidance; 04390: Hippo signaling pathway; 04391: Hippo signaling pathway - fly; 04520: Adherens junction; 04530: Tight junction; 05165: Human papillomavirus infection	K04237: partitioning defective protein 3	-		Bm4375a	Y	WBGene00224636	Bma-par-3	Abnormal embryonic partitioning of cytoplasm protein 3, isoform b, putative [Source:UniProtKB/TrEMBL;Acc:A0A4E9F2Q2]	0	94.9	1536		6562	7357	6943	6954	6494	8724	7593	7026	7105	6354	6338		7435.85	7180.67	6886.77	7495.9	7423.87	7029.6	7177.79	6637.84	6351.24	6494.13	6781.93		117.968	114.038	111.452	119.888	120.331	114.767	116.794	108.829
	BPAG_0000059901	1482	-	GO:0008289 - MF - lipid binding	-	-	-		Bm5843	Y	WBGene00226104	Bm5843	LBP / BPI / CETP family, N-terminal domain containing protein [Source:UniProtKB/TrEMBL;Acc:A0A4E9F2W0]	0	99	493		447	580	509	456	394	672	525	491	549	546	471		506.526	566.099	504.878	491.535	450.416	541.482	496.291	463.874	490.757	558.041	503.99		25.0025	27.9721	25.4217	24.4599	22.7147	27.5055	25.1254	23.6626
	BPAG_0000060001	1257	IPR017942: Lipid-binding serum glycoprotein, N-terminal; IPR017943: Bactericidal permeability-increasing protein, alpha/beta domain superfamily	GO:0008289 - MF - lipid binding	-	-	-		Bm10880a	Y	WBGene00231141	Bm10880	BPI1 domain-containing protein [Source:UniProtKB/TrEMBL;Acc:A0A5S6P883]	7.2e-199	86.4	332		278	188	192	291	201	482	250	154	205	77	172		315.021	183.494	190.445	313.677	229.781	388.385	236.329	145.492	183.252	78.6981	184.047		18.333	10.6897	11.3058	18.4033	13.6622	23.26	14.1061	8.75014
	BPAG_0000060101	219	-	-	-	-	-		Bm3072a	N	WBGene00223333	Bm3072	C2 domain-containing protein [Source:UniProtKB/TrEMBL;Acc:A0A4E9FI71]	1.7e-39	98.5	65		38	57	56	66	39	45	60	47	48	54	44		43.0604	55.6339	55.5465	71.1432	44.5844	36.26	56.719	44.4034	42.9077	55.1909	47.0819		14.3835	18.6027	18.9268	23.9573	15.2153	12.4643	19.4316	15.3279
	BPAG_0000060201	1563	-	-	-	-	-		Bm3072a	Y	WBGene00223333	Bm3072	C2 domain-containing protein [Source:UniProtKB/TrEMBL;Acc:A0A4E9FI71]	6.4e-308	96.6	472		148	197	179	180	183	245	187	206	190	192	191		167.709	192.278	177.55	194.027	209.204	197.415	176.774	194.619	169.843	196.234	204.378		7.84923	9.00849	8.47673	9.15484	10.0035	9.50835	8.48564	9.41322
	BPAG_0000060301	237	-	-	-	-	-		Bm3072a	N	WBGene00223333	Bm3072	C2 domain-containing protein [Source:UniProtKB/TrEMBL;Acc:A0A4E9FI71]	1.6e-27	94.4	54		18	16	24	36	24	28	41	29	16	21	15		20.397	15.6165	23.8056	38.8054	27.4365	22.5618	38.758	27.3978	14.3026	21.4631	16.0506		6.29576	4.82521	7.49544	12.0751	8.65212	7.16651	12.2698	8.73936
	BPAG_0000060401	1023	IPR000008: C2 domain; IPR035892: C2 domain superfamily	-	-	-	-		Bm3072a	N	WBGene00223333	Bm3072	C2 domain-containing protein [Source:UniProtKB/TrEMBL;Acc:A0A4E9FI71]	3.5e-206	89.2	334		351	395	340	315	254	429	389	323	347	294	294		397.742	385.533	337.247	339.547	290.37	345.678	367.728	305.155	310.187	300.484	314.593		28.4417	27.5973	24.6001	24.4778	21.2138	25.4378	26.9697	22.5505
	BPAG_0000060501	399	-	-	-	-	-		Bm5456	Y	WBGene00225717	Bm5456	-	6.5e-66	84.5	116		25	24	50	33	28	45	42	42	39	35	25		28.3292	23.4248	49.5951	35.5716	32.0093	36.26	39.7033	39.6796	34.8625	35.7719	26.7511		5.19387	4.29916	9.27537	6.57474	5.99577	6.84128	7.46583	7.51807
	BPAG_0000060601	252	-	-	-	-	-		-	-	-	-	-	-	-	-		4	3	1	0	2	1	1	1	7	0	1		4.53267	2.9281	0.991902	0	2.28638	0.805777	0.945317	0.944753	6.25738	0	1.07004		1.31578	0.850875	0.29372	0	0.678093	0.240712	0.28145	0.283419
	BPAG_0000060701	4713	-	GO:0003677 - MF - DNA binding; GO:0003918 - MF - DNA topoisomerase type II (ATP-hydrolyzing) activity; GO:0005524 - MF - ATP binding; GO:0006259 - BP - DNA metabolic process; GO:0006265 - BP - DNA topological change	01524: Platinum drug resistance; 03032: DNA replication proteins; 03036: Chromosome and associated proteins	K03164: DNA topoisomerase II	-		Bm5019a	Y	WBGene00225280	Bm5019	DNA topoisomerase 2 [Source:UniProtKB/TrEMBL;Acc:A0A4E9FP03]	0	97.4	1558		5086	6309	6262	5783	6372	8594	7157	7054	5882	6380	6468		5763.3	6157.79	6211.29	6233.65	7284.4	6924.85	6765.63	6664.29	5257.98	6520.7	6921.04		89.4547	95.6771	98.3444	97.5423	115.515	110.61	107.705	106.898
	BPAG_0000060801	393	-	-	-	-	-		Bm17532	Y	WBGene00268675	Bm17532	-	8.8e-09	100	24		104	112	111	102	70	120	100	96	108	83	84		117.85	109.316	110.101	109.949	80.0232	96.6933	94.5317	90.6963	96.5424	84.8304	89.8836		21.9364	20.369	20.9057	20.6322	15.2183	18.522	18.0472	17.4465
	BPAG_0000060901	1377	-	-	-	-	-		Bm9811	Y	WBGene00230072	Bma-cutl-9	Zona pellucida-like domain containing protein [Source:UniProtKB/TrEMBL;Acc:A0A4E9FCC3]	4.4e-298	92.7	452		106	111	89	119	111	157	125	98	88	104	90		120.116	108.34	88.2792	128.273	126.894	126.507	118.165	92.5858	78.6642	106.294	96.3039		6.38111	5.76148	4.78399	6.8699	6.8873	6.91614	6.4384	5.08302
	BPAG_0000061001	2943	IPR019354: Smg8/Smg9	GO:0000184 - BP - nuclear-transcribed mRNA catabolic process, nonsense-mediated decay	03019: Messenger RNA biogenesis	K18734: protein SMG8	-		Bm3859	Y	WBGene00224120	Bma-smg-8	-	0	96.4	980		1527	1767	1832	1850	1743	2385	2124	1906	2039	1910	1922		1730.35	1724.65	1817.16	1994.16	1992.58	1921.78	2007.85	1800.7	1822.68	1952.12	2056.62		43.0104	42.9132	46.0754	49.9711	50.6019	49.1582	51.1877	46.2554
	BPAG_0000061101	1779	IPR003280: Two pore domain potassium channel; IPR003961: Fibronectin type III; IPR013099: Potassium channel domain; IPR013783: Immunoglobulin-like fold; IPR036116: Fibronectin type III superfamily	GO:0005267 - MF - potassium channel activity; GO:0005515 - MF - protein binding; GO:0016020 - CC - membrane; GO:0071805 - BP - potassium ion transmembrane transport	-	-	-		Bm18600	Y	WBGene00304803	Bma-twk-30	-	0	99.7	592		266	340	348	285	256	390	384	332	257	259	217		301.423	331.851	345.182	307.209	292.656	314.253	363.002	313.658	229.735	264.712	232.199		12.3945	13.6599	14.479	12.7352	12.2949	13.298	15.3094	13.3288
	BPAG_0000061201	654	IPR009218: Predicted HD phosphohydrolase	-	-	-	-		Bm9810	Y	WBGene00230071	Bm9810	CG3579-PA, putative [Source:UniProtKB/TrEMBL;Acc:A0A4E9FCP5]	6.2e-153	98.2	217		48	72	83	52	64	77	85	49	44	52	60		54.3921	70.2743	82.3278	56.0522	73.1641	62.0448	80.352	46.2929	39.3321	53.1468	64.2026		6.08398	7.86864	9.39365	6.32067	8.36107	7.14186	9.21813	5.35116
	BPAG_0000061301	1530	-	GO:0005515 - MF - protein binding	01009: Protein phosphatases and associated proteins; 04022: cGMP-PKG signaling pathway; 04024: cAMP signaling pathway; 04270: Vascular smooth muscle contraction; 04510: Focal adhesion; 04611: Platelet activation; 04810: Regulation of actin cytoskeleton; 04921: Oxytocin signaling pathway; 05205: Proteoglycans in cancer	K06270: protein phosphatase 1 regulatory subunit 12A	-		Bm2006a	Y	WBGene00222267	Bma-mel-11	ANK_REP_REGION domain-containing protein [Source:UniProtKB/TrEMBL;Acc:A0A5S6PG69]	7.8e-254	93.9	506		879	1091	1029	1018	1091	1357	1297	1299	1416	1166	1097		996.055	1064.85	1020.67	1097.33	1247.22	1093.44	1226.08	1227.23	1265.78	1191.71	1173.84		47.6235	50.9657	49.7804	52.8925	60.9247	53.8005	60.1243	60.6384
	BPAG_0000061401	2133	IPR000239: GPCR kinase; IPR000719: Protein kinase domain; IPR000961: AGC-kinase, C-terminal; IPR001849: Pleckstrin homology domain; IPR008271: Serine/threonine-protein kinase, active site; IPR011009: Protein kinase-like domain superfamily; IPR011993: PH-like domain superfamily; IPR016137: RGS domain; IPR017441: Protein kinase, ATP binding site; IPR036305: RGS domain superfamily	GO:0004672 - MF - protein kinase activity; GO:0004674 - MF - protein serine/threonine kinase activity; GO:0004703 - MF - G-protein coupled receptor kinase activity; GO:0005524 - MF - ATP binding; GO:0006468 - BP - protein phosphorylation; GO:0007165 - BP - signal transduction	01001: Protein kinases; 04062: Chemokine signaling pathway; 04144: Endocytosis; 04147: Exosome; 04340: Hedgehog signaling pathway; 04724: Glutamatergic synapse; 04740: Olfactory transduction; 04745: Phototransduction - fly; 05032: Morphine addiction	K00910: beta-adrenergic-receptor kinase	-		Bm7964	Y	WBGene00228225	Bma-grk-2	G protein-coupled receptor kinase [Source:UniProtKB/TrEMBL;Acc:A0A4E9F705]	0	99.6	710		290	235	315	200	279	417	331	324	316	293	297		328.619	229.368	312.449	215.585	318.95	336.009	312.9	306.1	282.476	299.462	317.803		11.2702	7.87448	10.9308	7.45378	11.1757	11.8589	11.0062	10.8489
	BPAG_0000061501	258	-	-	-	-	-		Bm8057	Y	WBGene00228318	Bm8057	Bm8057 [Source:UniProtKB/TrEMBL;Acc:A0A0K0JUM2]	1.2e-55	100	85		469	492	551	475	394	573	454	581	528	406	438		531.456	480.208	546.538	512.015	450.416	461.71	429.174	548.902	471.985	414.954	468.679		150.688	136.298	158.076	146.356	130.478	134.72	124.807	160.837
	BPAG_0000061601	507	-	-	04147: Exosome	K17278: membrane-associated progesterone receptor component	-		Bm4878a	Y	WBGene00225139	Bma-vem-1	BMA-VEM-1 [Source:UniProtKB/TrEMBL;Acc:A0A0K0JGJ7]	3.9e-116	95.8	168		754	898	848	791	737	1052	898	932	1096	845	823		854.409	876.477	841.133	852.64	842.53	847.678	848.895	880.51	979.726	863.635	880.646		123.279	126.594	123.8	124.024	124.199	125.865	125.623	131.292
	BPAG_0000061701	2217	-	GO:0004725 - MF - protein tyrosine phosphatase activity; GO:0006470 - BP - protein dephosphorylation; GO:0016311 - BP - dephosphorylation; GO:0016791 - MF - phosphatase activity	01009: Protein phosphatases and associated proteins; 04940: Type I diabetes mellitus	K07817: receptor-type tyrosine-protein phosphatase N	-		Bm1721	Y	WBGene00221982	Bma-ida-1	-	0	92.8	738		455	505	490	458	469	701	541	637	413	500	420		515.592	492.896	486.032	493.69	536.156	564.85	511.417	601.808	369.185	511.027	449.418		17.0126	16.2806	16.3593	16.4224	18.0745	19.1801	17.3075	20.5212
	BPAG_0000061801	2322	IPR006145: Pseudouridine synthase, RsuA/RluB/C/D/E/F; IPR016009: tRNA methyltransferase TRMD/TRM10-type domain; IPR020103: Pseudouridine synthase, catalytic domain superfamily; IPR028564: tRNA methyltransferase TRM10-type domain; IPR038459: tRNA methyltransferase TRM10-type domain superfamily	GO:0001522 - BP - pseudouridine synthesis; GO:0003723 - MF - RNA binding; GO:0009451 - BP - RNA modification; GO:0009982 - MF - pseudouridine synthase activity	-	-	-		Bm10324a	Y	WBGene00230585	Bm10324	RNA pseudouridylate synthase family protein [Source:UniProtKB/TrEMBL;Acc:A0A5S6P789]	2e-267	82.6	512		888	1078	923	950	851	1156	1063	1042	1005	964	849		1006.25	1052.16	915.525	1024.03	972.854	931.478	1004.87	984.433	898.38	985.259	908.467		31.7011	33.1819	29.4221	32.5236	31.3132	30.1991	32.4693	32.0505
	BPAG_0000061901	654	IPR032072: Protein of unknown function DUF4807	-	-	-	-		Bm10323	Y	WBGene00230584	Bm10323	-	1.3e-144	97	203		191	158	201	206	165	244	240	252	296	250	236		216.435	154.213	199.372	222.053	188.626	196.61	226.876	238.078	264.598	255.513	252.53		24.2092	17.2673	22.7485	25.0396	21.5559	22.6313	26.0277	27.5203
	BPAG_0000062001	890	-	-	00536: Glycosaminoglycan binding proteins; 04147: Exosome; 04151: PI3K-Akt signaling pathway; 04510: Focal adhesion; 04512: ECM-receptor interaction; 04926: Relaxin signaling pathway; 04933: AGE-RAGE signaling pathway in diabetic complications; 04974: Protein digestion and absorption; 05146: Amoebiasis; 05165: Human papillomavirus infection; 05200: Pathways in cancer; 05222: Small cell lung cancer	K06237: collagen, type IV, alpha	-		Bm10322	Y	WBGene00230583	Bma-mec-5	Collagen alpha 2(IV) chain, putative [Source:UniProtKB/TrEMBL;Acc:A0A4E9FH83]	5.1e-43	100	63		14	15	13	14	16	36	24	26	22	17	10		15.8644	14.6405	12.8947	15.091	18.291	29.008	22.6876	24.5636	19.666	17.3749	10.7004		1.30395	1.20461	1.08115	1.25048	1.53599	2.45364	1.91259	2.08647
	BPAG_0000062101	500	IPR008160: Collagen triple helix repeat	-	-	-	-		Bm10321a	Y	WBGene00230582	Bm10321	Bm8544 [Source:UniProtKB/TrEMBL;Acc:A0A1I9GCN5]	2.3e-80	98.7	155		351	465	399	327	361	409	423	494	343	295	304		397.742	453.855	395.769	352.482	412.691	329.563	399.869	466.708	306.611	301.506	325.293		58.1917	66.4703	59.0659	51.9894	61.6875	49.6194	60.0029	70.5646
	BPAG_0000062201	627	IPR006931: Calcipressin; IPR012677: Nucleotide-binding alpha-beta plait domain superfamily; IPR035979: RNA-binding domain superfamily	GO:0003676 - MF - nucleic acid binding; GO:0019722 - BP - calcium-mediated signaling	99995: Signaling proteins	K17905: calcipression-3	-		Bm4376	Y	WBGene00224637	Bma-rcan-1	Calcipressin-like protein, putative [Source:UniProtKB/TrEMBL;Acc:A0A4E9F6Z7]	1.3e-152	100	208		1180	1249	1231	1253	1017	1471	1234	1279	1466	1090	1030		1337.14	1219.06	1221.03	1350.64	1162.62	1185.3	1166.52	1208.34	1310.47	1114.04	1102.14		156.005	142.377	145.32	158.862	138.584	142.313	139.588	145.691
	BPAG_0000062301	1128	IPR013657: UAA transporter	GO:0055085 - BP - transmembrane transport	02000: Transporters	K15277: solute carrier family 35 (adenosine 3'-phospho 5'-phosphosulfate transporter), member B3	-		Bm4374a	Y	WBGene00224635	Bma-pst-2	BMA-PST-2 [Source:UniProtKB/TrEMBL;Acc:A0A5S6PMM1]	2.7e-252	98.1	369		67	86	116	97	117	122	128	154	192	156	155		75.9223	83.9388	115.061	104.559	133.753	98.3048	121.001	145.492	171.631	159.44	165.857		4.92368	5.44922	7.61173	6.83597	8.8621	6.56068	8.04827	9.75083
	BPAG_0000062401	1098	-	-	-	-	-		Bm4493	Y	WBGene00224754	Bm4493	-	4e-280	98.9	365		119	128	144	130	168	201	198	228	248	200	209		134.847	124.932	142.834	140.13	192.056	161.961	187.173	215.404	221.69	204.411	223.639		8.98398	8.33206	9.70721	9.41193	13.0727	11.1043	12.7898	14.8307
	BPAG_0000062501	2004	IPR001752: Kinesin motor domain; IPR019821: Kinesin motor domain, conserved site; IPR027417: P-loop containing nucleoside triphosphate hydrolase; IPR036961: Kinesin motor domain superfamily	GO:0003777 - MF - microtubule motor activity; GO:0005524 - MF - ATP binding; GO:0007018 - BP - microtubule-based movement; GO:0008017 - MF - microtubule binding	04340: Hedgehog signaling pathway; 04812: Cytoskeleton proteins	K10394: kinesin family member 3/17	-		Bm6710	Y	WBGene00226971	Bma-klp-20	Kinesin-like protein [Source:UniProtKB/TrEMBL;Acc:A0A4E9F6X4]	0	99	667		640	810	891	743	737	987	850	915	917	849	787		725.228	790.586	883.784	800.899	842.53	795.302	803.52	864.449	819.716	867.723	842.124		26.4732	28.889	32.909	29.4733	31.4217	29.8757	30.0831	32.6102
	BPAG_0000062601	1239	IPR002498: Phosphatidylinositol-4-phosphate 5-kinase, core; IPR027483: Phosphatidylinositol-4-phosphate 5-kinase, C-terminal; IPR027484: Phosphatidylinositol-4-phosphate 5-kinase, N-terminal	GO:0016307 - MF - phosphatidylinositol phosphate kinase activity; GO:0046488 - BP - phosphatidylinositol metabolic process	00562: Inositol phosphate metabolism; 04070: Phosphatidylinositol signaling system; 04810: Regulation of actin cytoskeleton	K00920: 1-phosphatidylinositol-5-phosphate 4-kinase	-		Bm6682	Y	WBGene00226943	Bma-ppk-2	Pip kinase protein 2, putative [Source:UniProtKB/TrEMBL;Acc:A0A4E9F8X4]	1.1e-301	99.3	412		1546	1784	1609	1688	1537	2076	1813	1862	2128	1754	1653		1751.88	1741.24	1595.97	1819.54	1757.08	1672.79	1713.86	1759.13	1902.24	1792.68	1768.78		103.434	102.913	96.1211	108.303	105.989	101.638	103.783	107.334
	BPAG_0000062701	2967	-	-	-	-	-		Bm5783	Y	WBGene00226044	Bm5783	Bm5783, isoform a [Source:UniProtKB/TrEMBL;Acc:A0A0H5S888]	0	98.6	982		702	857	851	754	871	1163	1052	1120	1128	1005	1016		795.484	836.46	844.108	812.757	995.717	937.119	994.474	1058.12	1008.33	1027.16	1087.16		19.613	20.6447	21.2298	20.2019	25.0819	23.7772	25.1478	26.9606
	BPAG_0000062801	237	-	-	-	-	-		-	-	-	-	-	-	-	-		1	2	5	11	6	6	5	9	8	11	9		1.13317	1.95207	4.95951	11.8572	6.85913	4.83466	4.72659	8.50278	7.15129	11.2426	9.63039		0.349765	0.603152	1.56155	3.68962	2.16303	1.53568	1.49632	2.71221
	BPAG_0000062901	414	-	GO:0003735 - MF - structural constituent of ribosome; GO:0005622 - CC - intracellular; GO:0005840 - CC - ribosome; GO:0006412 - BP - translation	03010: Ribosome; 03011: Ribosome	K02963: small subunit ribosomal protein S18	-		Bm16930	Y	WBGene00255532	Bma-mrps-18.C	Bm16930 [Source:UniProtKB/TrEMBL;Acc:A8PJ79]	4.4e-98	99.3	137		678	776	770	648	574	802	679	661	863	707	671		768.288	757.401	763.764	698.496	656.19	646.233	641.87	624.482	771.445	722.592	717.999		135.754	133.97	137.665	124.426	118.46	117.509	116.325	114.033
	BPAG_0000063001	1218	IPR000504: RNA recognition motif domain; IPR000571: Zinc finger, CCCH-type; IPR012677: Nucleotide-binding alpha-beta plait domain superfamily; IPR035979: RNA-binding domain superfamily; IPR036855: Zinc finger, CCCH-type superfamily	GO:0003676 - MF - nucleic acid binding; GO:0046872 - MF - metal ion binding	03040: Spliceosome; 03041: Spliceosome	K12872: pre-mRNA-splicing factor RBM22/SLT11	-		Bm5730	Y	WBGene00225991	Bma-rbm-22	Rbm22 protein, putative [Source:UniProtKB/TrEMBL;Acc:A0A4E9ET39]	7e-303	97.8	408		3066	3348	3438	3147	2821	3819	3542	3263	3915	2937	2884		3474.29	3267.76	3410.16	3392.24	3224.94	3077.26	3348.31	3082.73	3499.66	3001.77	3086		208.665	196.464	208.926	205.394	197.886	190.196	206.254	191.337
	BPAG_0000063101	981	IPR000210: BTB/POZ domain; IPR003131: Potassium channel tetramerisation-type BTB domain; IPR011333: SKP1/BTB/POZ domain superfamily	GO:0005515 - MF - protein binding; GO:0051260 - BP - protein homooligomerization	04121: Ubiquitin system	K21914: -	-		Bm2896	Y	WBGene00223157	Bma-inso-1	MKIAA0176 protein, putative [Source:UniProtKB/TrEMBL;Acc:A0A4E9ENU0]	9.4e-190	99.6	265		610	780	781	705	706	1025	761	810	740	702	637		691.233	761.305	774.675	759.938	807.091	825.922	719.386	765.25	661.494	717.481	681.618		51.5448	56.8291	58.9273	57.1291	61.4887	63.3801	55.0196	58.972
	BPAG_0000063201	594	IPR036514: SGNH hydrolase superfamily	-	00565: Ether lipid metabolism	K16795: platelet-activating factor acetylhydrolase IB subunit beta/gamma	-		Bm10153	Y	WBGene00230414	Bm10153	Platelet-activating factor acetylhydrolase IB gamma subunit, putative [Source:UniProtKB/TrEMBL;Acc:A0A4E9EQ25]	1.3e-125	91.4	197		362	454	402	421	397	615	407	393	513	433	396		410.207	443.119	398.744	453.807	453.846	495.553	384.744	371.288	458.576	442.549	423.737		50.518	54.6279	50.0926	56.3421	57.1036	62.8039	48.597	47.2537
	BPAG_0000063301	597	IPR019189: Ribosomal protein L27/L41, mitochondrial	-	03011: Ribosome	K17422: large subunit ribosomal protein L41, mitochondrial	-		Bm1805	Y	WBGene00222066	Bma-mrpl-41	BMA-MRPL-41 [Source:UniProtKB/TrEMBL;Acc:A8PJ72]	3e-141	95.5	198		1766	1948	1872	1668	1445	2002	1878	1720	2033	1531	1535		2001.18	1901.31	1856.84	1797.98	1651.91	1613.17	1775.31	1624.98	1817.32	1564.76	1642.52		245.211	233.217	232.095	222.105	206.801	203.417	223.112	205.771
	BPAG_0000063401	630	-	-	-	-	-		Bm2088a	Y	WBGene00222349	Bma-hsp-25	BMA-HSP-25, isoform c [Source:UniProtKB/TrEMBL;Acc:A0A1I9G2Y9]	1.3e-132	99.5	209		4651	4735	4224	3775	2935	4495	3734	4206	4208	3187	3175		5270.37	4621.51	4189.79	4069.17	3355.26	3621.97	3529.81	3973.63	3761.58	3257.28	3397.39		611.97	537.186	496.269	476.336	398.041	432.8	420.374	476.824
	BPAG_0000063501	834	IPR000742: EGF-like domain; IPR003582: ShKT domain; IPR012674: Calycin; IPR013032: EGF-like, conserved site; IPR014878: Domain of unknown function DUF1794	-	-	-	-		Bm7339a	Y	WBGene00227600	Bma-mab-7	BMA-MAB-7 [Source:UniProtKB/TrEMBL;Acc:A0A5S6PV41]	5.3e-203	98.1	269		114	114	107	131	84	100	91	103	110	158	141		129.181	111.268	106.133	141.208	96.0279	80.5777	86.0239	97.3096	98.3302	161.484	150.876		11.3309	9.76975	9.49625	12.4866	8.60544	7.27331	7.73886	8.82066
	BPAG_0000063601	1485	IPR036570: HORMA domain superfamily	-	03029: Mitochondrial biogenesis; 04131: Membrane trafficking; 04136: Autophagy - other; 04138: Autophagy - yeast; 04140: Autophagy - animal; 04211: Longevity regulating pathway; 05017: Spinocerebellar ataxia	K08331: autophagy-related protein 13	-		Bm3029	Y	WBGene00223290	Bma-atg-13	BMA-ATG-13 [Source:UniProtKB/TrEMBL;Acc:A0A0K0J8H2]	0	98.6	494		883	934	930	864	803	1034	940	963	994	978	904		1000.59	911.614	922.469	931.329	917.981	833.174	888.598	909.797	888.547	999.568	967.319		49.29	44.9537	46.3544	46.2514	46.2007	42.2369	44.8955	46.3158
	BPAG_0000063701	981	IPR019402: Frag1/DRAM/Sfk1	-	04131: Membrane trafficking	K21956: -	-		Bm2527	Y	WBGene00222788	Bm2527	FLJ11259 protein, putative [Source:UniProtKB/TrEMBL;Acc:A0A0K0J6D7]	8.7e-195	98.9	267		757	898	876	847	745	1044	910	970	1067	879	865		857.809	876.477	868.906	913.004	851.676	841.231	860.239	916.411	953.803	898.385	925.587		63.9663	65.4263	66.0951	68.636	64.8854	64.555	65.7922	70.6208
	BPAG_0000063801	1053	IPR000418: Ets domain; IPR003118: Pointed domain; IPR013761: Sterile alpha motif/pointed domain superfamily; IPR036388: Winged helix-like DNA-binding domain superfamily; IPR036390: Winged helix DNA-binding domain superfamily	GO:0003700 - MF - transcription factor activity, sequence-specific DNA binding; GO:0005634 - CC - nucleus; GO:0006355 - BP - regulation of transcription, DNA-templated; GO:0043565 - MF - sequence-specific DNA binding	03000: Transcription factors	K17102: ETS homologous factor	-		Bm2528	Y	WBGene00222789	Bma-svh-5	Ets-domain containing protein [Source:UniProtKB/TrEMBL;Acc:A0A4E9ET50]	9.6e-236	99.4	317		1968	2652	2402	2196	1895	2684	2367	2353	2191	2139	2160		2230.08	2588.44	2382.55	2367.13	2166.34	2162.71	2237.57	2223	1958.56	2186.17	2311.29		154.925	180.007	168.841	165.784	153.759	154.615	159.431	159.596
	BPAG_0000063901	840	IPR000301: Tetraspanin; IPR008952: Tetraspanin, EC2 domain superfamily; IPR018499: Tetraspanin/Peripherin	GO:0016021 - CC - integral component of membrane	99992: Structural proteins	K17350: tetraspanin-9	-		Bm2271	Y	WBGene00222532	Bma-tsp-21	Tetraspanin [Source:UniProtKB/TrEMBL;Acc:A0A4E9EQ33]	9.5e-197	97.1	279		728	883	771	766	695	981	874	840	962	782	798		824.947	861.837	764.756	825.692	794.516	790.467	826.207	793.593	859.942	799.246	853.894		71.8417	75.1322	67.9375	72.4915	70.6912	70.8415	73.7962	71.4216
	BPAG_0000064001	576	IPR001806: Small GTPase superfamily; IPR003578: Small GTPase superfamily, Rho type; IPR005225: Small GTP-binding protein domain; IPR027417: P-loop containing nucleoside triphosphate hydrolase	GO:0003924 - MF - GTPase activity; GO:0005525 - MF - GTP binding; GO:0005622 - CC - intracellular; GO:0007264 - BP - small GTPase mediated signal transduction	04011: MAPK signaling pathway - yeast; 04014: Ras signaling pathway; 04015: Rap1 signaling pathway; 04022: cGMP-PKG signaling pathway; 04024: cAMP signaling pathway; 04031: GTP-binding proteins; 04062: Chemokine signaling pathway; 04071: Sphingolipid signaling pathway; 04072: Phospholipase D signaling pathway; 04131: Membrane trafficking; 04144: Endocytosis; 04147: Exosome; 04150: mTOR signaling …	K04513: Ras homolog gene family, member A	-		Bm10155	Y	WBGene00230416	Bma-rho-1.1	Bm10155 [Source:UniProtKB/TrEMBL;Acc:A0A0K0IM87]	7.2e-137	100	191		1489	1655	1451	1429	1173	1636	1359	1664	1648	1337	1337		1687.29	1615.33	1439.25	1540.36	1340.96	1318.25	1284.69	1572.07	1473.17	1366.49	1430.65		214.287	205.362	186.457	197.218	173.994	172.29	167.34	206.329
	BPAG_0000064101	591	IPR001806: Small GTPase superfamily; IPR003578: Small GTPase superfamily, Rho type; IPR005225: Small GTP-binding protein domain; IPR027417: P-loop containing nucleoside triphosphate hydrolase	GO:0003924 - MF - GTPase activity; GO:0005525 - MF - GTP binding; GO:0005622 - CC - intracellular; GO:0007264 - BP - small GTPase mediated signal transduction	04011: MAPK signaling pathway - yeast; 04014: Ras signaling pathway; 04015: Rap1 signaling pathway; 04022: cGMP-PKG signaling pathway; 04024: cAMP signaling pathway; 04031: GTP-binding proteins; 04062: Chemokine signaling pathway; 04071: Sphingolipid signaling pathway; 04072: Phospholipase D signaling pathway; 04131: Membrane trafficking; 04144: Endocytosis; 04147: Exosome; 04150: mTOR signaling …	K04513: Ras homolog gene family, member A	-		Bm6727	Y	WBGene00226988	Bm6727	RAS-like GTP-binding protein RhoA, putative [Source:UniProtKB/TrEMBL;Acc:A0A4E9ERL5]	4.3e-126	100	175		473	369	483	306	349	395	537	336	376	368	350		535.989	360.156	479.088	329.846	398.973	318.282	507.635	317.437	336.111	376.116	374.515		66.3434	44.6256	60.4914	41.1596	50.4542	40.5422	64.4449	40.6052
	BPAG_0000064201	1650	IPR015894: Guanylate-binding protein, N-terminal; IPR027417: P-loop containing nucleoside triphosphate hydrolase; IPR030386: GB1/RHD3-type guanine nucleotide-binding (G) domain; IPR036543: Guanylate-binding protein, C-terminal domain superfamily	GO:0003924 - MF - GTPase activity; GO:0005525 - MF - GTP binding	04131: Membrane trafficking	K17339: atlastin	-		Bm6520	Y	WBGene00226781	Bma-atln-2	Guanylate-binding protein, N-terminal domain containing protein [Source:UniProtKB/TrEMBL;Acc:A0A4E9EP30]	0	92.7	549		275	282	285	236	253	370	342	224	278	254	238		311.621	275.241	282.692	254.391	289.227	298.138	323.298	211.625	248.507	259.602	254.67		13.8157	12.2155	12.7848	11.3701	13.1008	13.6024	14.7009	9.69603
	BPAG_0000064301	1170	IPR004934: Tropomodulin; IPR032675: Leucine-rich repeat domain superfamily	GO:0005523 - MF - tropomyosin binding; GO:0051694 - BP - pointed-end actin filament capping	04812: Cytoskeleton proteins	K10370: tropomodulin	-		Bm1996	Y	WBGene00222257	Bma-unc-94	BMA-UNC-94 [Source:UniProtKB/TrEMBL;Acc:A0A0I9R383]	1.5e-262	99.7	383		1696	1910	1957	1902	1621	2415	2012	2053	2036	1889	1706		1921.85	1864.22	1941.15	2050.22	1853.11	1945.95	1901.98	1939.58	1820	1930.66	1825.49		120.161	116.679	123.805	129.23	118.374	125.207	121.967	125.324
	BPAG_0000064401	219	-	-	-	-	-		-	-	-	-	-	-	-	-		0	1	1	1	3	1	1	1	5	0	1		0	0.976033	0.991902	1.07793	3.42957	0.805777	0.945317	0.944753	4.46955	0	1.07004		0	0.326363	0.337979	0.362989	1.17041	0.276984	0.32386	0.326126
	BPAG_0000064501	162	-	-	-	-	-		-	-	-	-	-	-	-	-		1	3	3	5	3	5	5	1	3	2	2		1.13317	2.9281	2.9757	5.38963	3.42957	4.02889	4.72659	0.944753	2.68173	2.04411	2.14009		0.511693	1.32358	1.37069	2.45354	1.58222	1.8722	2.18906	0.440874
	BPAG_0000064601	2259	IPR001478: PDZ domain; IPR001660: Sterile alpha motif domain; IPR013761: Sterile alpha motif/pointed domain superfamily; IPR036034: PDZ superfamily	GO:0005515 - MF - protein binding	01009: Protein phosphatases and associated proteins; 04812: Cytoskeleton proteins	K17551: neurabin	-		Bm2719a	Y	WBGene00222980	Bma-nab-1	BMA-NAB-1, isoform a; BMA-NAB-1, isoform b [Source:UniProtKB/TrEMBL;Acc:A0A0I9N9B7]	0	98	752		2745	3226	3327	3073	3260	4366	3557	3421	3642	3342	3305		3110.55	3148.68	3300.06	3312.47	3726.8	3518.02	3362.49	3232	3255.62	3415.7	3536.49		100.728	102.069	109.011	108.139	123.299	117.237	111.678	108.16
	BPAG_0000064701	2142	IPR002073: 3'5'-cyclic nucleotide phosphodiesterase, catalytic domain; IPR003018: GAF domain; IPR003607: HD/PDEase domain; IPR023088: 3'5'-cyclic nucleotide phosphodiesterase; IPR023174: 3'5'-cyclic nucleotide phosphodiesterase, conserved site; IPR029016: GAF-like domain superfamily; IPR036971: 3'5'-cyclic nucleotide phosphodiesterase, catalytic domain superfamily	GO:0004114 - MF - 3',5'-cyclic-nucleotide phosphodiesterase activity; GO:0005515 - MF - protein binding; GO:0007165 - BP - signal transduction; GO:0008081 - MF - phosphoric diester hydrolase activity	00230: Purine metabolism; 04024: cAMP signaling pathway; 05032: Morphine addiction	K18438: cAMP and cAMP-inhibited cGMP 3',5'-cyclic phosphodiesterase 10	-		Bm2519a	Y	WBGene00222780	Bma-pde-5	Phosphodiesterase [Source:UniProtKB/TrEMBL;Acc:A0A5S6PHY3]	0	99.3	672		701	803	773	695	627	916	782	719	708	669	634		794.351	783.754	766.74	749.159	716.779	738.092	739.238	679.278	632.889	683.754	678.407		27.1283	26.7942	26.7113	25.7931	25.0097	25.9402	25.8934	23.9739
	BPAG_0000064801	1074	-	-	00536: Glycosaminoglycan binding proteins; 04151: PI3K-Akt signaling pathway; 04510: Focal adhesion; 04512: ECM-receptor interaction; 05165: Human papillomavirus infection; 05206: MicroRNAs in cancer	K06252: tenascin	-		Bm4157a	Y	WBGene00224418	Bm4157	Bm4157 [Source:UniProtKB/TrEMBL;Acc:A0A5S6PLU2]	8.4e-188	87.1	357		288	421	471	294	331	416	396	368	374	321	300		326.353	410.91	467.186	316.91	378.396	335.203	374.346	347.669	334.323	328.079	321.013		22.2286	28.0171	32.4602	21.7611	26.332	23.4956	26.1513	24.4722
	BPAG_0000064901	2100	-	-	-	-	-		Bm2211a	Y	WBGene00222472	Bma-sol-1	BMA-SOL-1 [Source:UniProtKB/TrEMBL;Acc:A0A5S6PGS9]	0	96.9	705		527	661	645	491	513	678	571	674	507	428	429		597.18	645.158	639.777	529.262	586.456	546.317	539.776	636.764	453.213	437.439	459.049		20.8025	22.4971	22.7339	18.5866	20.8717	19.5843	19.285	22.9229
	BPAG_0000065001	345	-	-	-	-	-		-	-	-	-	-	-	-	-		7	8	7	6	8	15	17	19	15	7	9		7.93218	7.80826	6.94331	6.46756	9.14551	12.0867	16.0704	17.9503	13.4087	7.15437	9.63039		1.68191	1.65736	1.5018	1.38251	1.98121	2.63736	3.49487	3.93337
	BPAG_0000065101	1899	IPR006630: La-type HTH domain; IPR035979: RNA-binding domain superfamily; IPR036388: Winged helix-like DNA-binding domain superfamily; IPR036390: Winged helix DNA-binding domain superfamily	GO:0003676 - MF - nucleic acid binding	03019: Messenger RNA biogenesis	K18763: la-related protein 4	-		Bm5754	Y	WBGene00226015	Bma-larp-5	HTH La-type RNA-binding domain-containing protein [Source:UniProtKB/TrEMBL;Acc:A0A4E9FKV9]	0	94.9	624		2717	3239	3275	3130	3062	4216	3680	3446	3705	3326	3137		3078.82	3161.37	3248.48	3373.91	3500.44	3397.16	3478.77	3255.62	3311.94	3399.35	3356.73		118.601	121.908	127.65	131.026	137.765	134.671	137.444	129.604
	BPAG_0000065201	231	-	-	-	-	-		-	-	-	-	-	-	-	-		354	409	444	422	291	449	375	445	453	347	304		401.142	399.197	440.404	454.885	332.668	361.794	354.494	420.415	404.942	354.653	325.293		127.033	126.548	142.267	145.224	107.632	117.905	115.139	137.587
	BPAG_0000065301	1416	-	-	03000: Transcription factors; 04310: Wnt signaling pathway; 04390: Hippo signaling pathway; 04520: Adherens junction; 04916: Melanogenesis; 04934: Cushing syndrome; 05132: Salmonella infection; 05165: Human papillomavirus infection; 05200: Pathways in cancer; 05210: Colorectal cancer; 05213: Endometrial cancer; 05215: Prostate cancer; 05216: Thyroid cancer; 05217: Basal cell carcinoma; 05221: Acu…	K04491: transcription factor 7-like 2	-		Bm6269a	Y	WBGene00226530	Bma-pop-1	BMA-POP-1, isoform a; BMA-POP-1, isoform b [Source:UniProtKB/TrEMBL;Acc:A0A5S6PS69]	2.8e-269	98.3	418		3625	4202	4289	4127	3545	5409	4499	4752	4918	3744	3742		4107.74	4101.29	4254.27	4448.6	4052.6	4358.45	4252.98	4489.47	4396.25	3826.57	4004.1		212.212	212.099	224.196	231.691	213.901	231.714	225.348	239.686
	BPAG_0000065401	312	-	-	-	-	-		-	-	-	-	-	-	-	-		492	576	634	496	543	766	644	604	708	507	554		557.519	562.195	628.866	534.652	620.752	617.225	608.784	570.631	632.889	518.181	592.804		130.718	131.951	150.407	126.376	148.698	148.927	146.397	138.265
	BPAG_0000065501	2676	IPR001672: Phosphoglucose isomerase (PGI); IPR006761: Twisted gastrulation (Tsg) protein; IPR018189: Phosphoglucose isomerase, conserved site; IPR023096: Phosphoglucose isomerase, C-terminal; IPR035476: Phosphoglucose isomerase, SIS domain 1; IPR035482: Phosphoglucose isomerase, SIS domain 2	GO:0004347 - MF - glucose-6-phosphate isomerase activity; GO:0006094 - BP - gluconeogenesis; GO:0006096 - BP - glycolytic process	00010: Glycolysis / Gluconeogenesis; 00030: Pentose phosphate pathway; 00500: Starch and sucrose metabolism; 00520: Amino sugar and nucleotide sugar metabolism; 04147: Exosome	K01810: glucose-6-phosphate isomerase	-		Bm13946	Y	WBGene00234207	Bma-gpi-1	Glucose-6-phosphate isomerase [Source:UniProtKB/TrEMBL;Acc:A0A4E9FHX4]	0	95.6	881		3487	3854	3742	3334	3073	4412	3838	3735	3887	3401	3323		3951.36	3761.63	3711.7	3593.81	3513.02	3555.09	3628.13	3528.65	3474.63	3476	3555.75		108.016	102.937	103.503	99.0414	98.1152	100.011	101.723	99.686
	BPAG_0000065601	516	IPR000608: Ubiquitin-conjugating enzyme E2; IPR016135: Ubiquitin-conjugating enzyme/RWD-like; IPR023313: Ubiquitin-conjugating enzyme, active site	-	04120: Ubiquitin mediated proteolysis; 04121: Ubiquitin system; 04141: Protein processing in endoplasmic reticulum; 05012: Parkinson disease	K04555: ubiquitin-conjugating enzyme E2 G2	-		Bm7174	Y	WBGene00227435	Bma-ubc-14	UBIQUITIN_CONJUGAT_2 domain-containing protein [Source:UniProtKB/TrEMBL;Acc:A0A4E9FTX5]	4.6e-130	100	171		847	938	922	831	594	987	740	799	810	721	660		959.794	915.519	914.533	895.757	679.054	795.302	699.535	754.858	724.068	736.9	706.229		136.069	129.927	132.256	128.023	98.355	116.029	101.715	110.593
	BPAG_0000065701	873	-	-	-	-	-		Bm12822	Y	WBGene00233083	Bm12822	-	1.2e-181	93.8	290		1469	1645	1537	1499	1252	1979	1594	1636	1549	1529	1489		1664.62	1605.57	1524.55	1615.81	1431.27	1594.63	1506.84	1545.62	1384.67	1562.72	1593.29		139.486	134.678	130.315	136.498	122.532	137.509	129.502	133.844
	BPAG_0000065801	1659	IPR001732: UDP-glucose/GDP-mannose dehydrogenase, N-terminal; IPR008927: 6-phosphogluconate dehydrogenase-like, C-terminal domain superfamily; IPR014026: UDP-glucose/GDP-mannose dehydrogenase, dimerisation; IPR014027: UDP-glucose/GDP-mannose dehydrogenase, C-terminal; IPR017476: UDP-glucose/GDP-mannose dehydrogenase; IPR036220: UDP-glucose/GDP-mannose dehydrogenase, C-terminal domain superfamily;…	GO:0016616 - MF - oxidoreductase activity, acting on the CH-OH group of donors, NAD or NADP as acceptor; GO:0051287 - MF - NAD binding; GO:0055114 - BP - oxidation-reduction process	00040: Pentose and glucuronate interconversions; 00053: Ascorbate and aldarate metabolism; 00520: Amino sugar and nucleotide sugar metabolism	K00012: UDPglucose 6-dehydrogenase	-		Bm3695a	Y	WBGene00223956	Bma-sqv-4	UDP-glucose 6-dehydrogenase [Source:UniProtKB/TrEMBL;Acc:A0A5S6PL58]	0	97.1	480		1588	1746	1599	1516	1375	1934	1672	1713	1610	1465	1512		1799.47	1704.15	1586.05	1634.14	1571.88	1558.37	1580.57	1618.36	1439.2	1497.31	1617.91		79.3466	75.2216	71.3405	72.6424	70.8135	70.7144	71.4812	73.7464
	BPAG_0000065901	1398	IPR003112: Olfactomedin-like domain; IPR008160: Collagen triple helix repeat	-	-	-	-		Bm3306	Y	WBGene00223567	Bma-unc-122	Olfactomedin-like domain-containing protein [Source:UniProtKB/TrEMBL;Acc:A0A4E9FGV8]	4.9e-308	97.8	465		87	108	112	88	122	161	120	152	147	125	117		98.5857	105.412	111.093	94.8575	139.469	129.73	113.438	143.603	131.405	127.757	125.195		5.15865	5.52156	5.92987	5.00395	7.45611	6.98581	6.08802	7.76544
	BPAG_0000066001	192	-	-	-	-	-		Bm4076	N	WBGene00224337	Bm4076	Bm4076 [Source:UniProtKB/TrEMBL;Acc:A0A0H5S7Q3]	2.2e-28	98.2	55		99	86	124	106	120	153	133	131	163	146	110		112.184	83.9388	122.996	114.26	137.183	123.284	125.727	123.763	145.707	149.22	117.705		42.7423	32.0142	47.8029	43.8876	53.3998	48.338	49.1306	48.7304
	BPAG_0000066101	1257	IPR016021: MIF4G-like domain superfamily	-	-	-	-		Bm4076	Y	WBGene00224337	Bm4076	Bm4076 [Source:UniProtKB/TrEMBL;Acc:A0A0H5S7Q3]	3.3e-160	91.6	417		996	914	1058	942	1011	1502	1138	1311	1437	1142	1150		1128.64	892.094	1049.43	1015.41	1155.76	1210.28	1075.77	1238.57	1284.55	1167.18	1230.55		65.6823	51.9704	62.2995	59.5735	68.7188	72.4824	64.2109	74.4899
	BPAG_0000066201	1614	IPR003593: AAA+ ATPase domain; IPR003959: ATPase, AAA-type, core; IPR003960: ATPase, AAA-type, conserved site; IPR027417: P-loop containing nucleoside triphosphate hydrolase	GO:0005524 - MF - ATP binding	04131: Membrane trafficking	K13254: spastin	-		Bm2335a	Y	WBGene00222596	Bma-spas-1	Probable spastin homolog Bm1_53365 [Source:UniProtKB/Swiss-Prot;Acc:A8QFF6]	3.5e-317	98.7	456		1064	1246	1255	1119	1090	1403	1352	1331	1421	1095	1212		1205.69	1216.14	1244.84	1206.2	1246.08	1130.51	1278.07	1257.47	1270.25	1119.15	1296.89		54.6465	55.1772	57.5539	55.1143	57.7009	52.7293	59.4121	58.8985
	BPAG_0000066301	1353	IPR002646: Poly A polymerase, head domain; IPR032828: tRNA nucleotidyltransferase/poly(A) polymerase, RNA and SrmB- binding domain	GO:0003723 - MF - RNA binding; GO:0006396 - BP - RNA processing; GO:0016779 - MF - nucleotidyltransferase activity	03013: RNA transport; 03016: Transfer RNA biogenesis	K00974: tRNA nucleotidyltransferase (CCA-adding enzyme)	-		Bm4409	Y	WBGene00224670	Bma-hpo-31	BMA-HPO-31 [Source:UniProtKB/TrEMBL;Acc:A0A0H5S8N7]	0	97.3	450		747	898	898	816	756	1059	929	953	780	843	826		846.477	876.477	890.728	879.588	864.251	853.318	878.2	900.35	697.251	861.591	883.856		45.7664	47.4377	49.1262	47.9435	47.7402	47.4784	48.699	50.3066
	BPAG_0000066401	1332	IPR001478: PDZ domain; IPR036034: PDZ superfamily	GO:0005515 - MF - protein binding	04131: Membrane trafficking	K20057: -	-		Bm10273a	Y	WBGene00230534	Bma-mics-1	BMA-MICS-1 [Source:UniProtKB/TrEMBL;Acc:A0A5S6P761]	8.7e-295	96.9	447		356	479	531	508	443	631	549	607	577	560	497		403.408	467.52	526.7	547.587	506.433	508.445	518.979	573.465	515.787	572.35	531.811		22.1549	25.7025	29.507	30.3177	28.4158	28.7358	29.2328	32.5472
	BPAG_0000066501	900	IPR000719: Protein kinase domain; IPR008271: Serine/threonine-protein kinase, active site; IPR011009: Protein kinase-like domain superfamily	GO:0004672 - MF - protein kinase activity; GO:0005524 - MF - ATP binding; GO:0006468 - BP - protein phosphorylation	-	-	-		Bm17834	Y	WBGene00268976	Bm17834	Protein kinase domain-containing protein [Source:UniProtKB/TrEMBL;Acc:A0A5S6PEL6]	7e-215	95.3	296		180	221	211	190	164	225	243	213	213	173	161		203.97	215.703	209.291	204.806	187.483	181.3	229.712	201.232	190.403	176.815	172.277		16.5788	17.5507	17.353	16.7822	15.569	15.1648	19.1499	16.9031
	BPAG_0000066601	603	-	-	-	-	-		Bm1591	Y	WBGene00221852	Bm1591	-	5e-124	94.1	203		74	7	1	114	25	116	11	3	59	37	48		83.8545	6.83223	0.991902	122.884	28.5797	93.4702	10.3985	2.83426	52.7407	37.816	51.3621		10.1728	0.829709	0.122749	15.0288	3.54228	11.6691	1.29383	0.355331
	BPAG_0000066701	1524	-	GO:0004888 - MF - transmembrane signaling receptor activity; GO:0005216 - MF - ion channel activity; GO:0005230 - MF - extracellular ligand-gated ion channel activity; GO:0006811 - BP - ion transport; GO:0016021 - CC - integral component of membrane; GO:0022848 - MF - acetylcholine-gated cation channel activity; GO:0034220 - BP - ion transmembrane transport; GO:0045211 - CC - postsynaptic membrane	04040: Ion channels	K05312: nicotinic acetylcholine receptor, invertebrate	-		Bm13586a	Y	WBGene00233847	Bma-acr-16	-	0	99.6	507		199	221	220	205	165	258	199	229	228	203	162		225.501	215.703	218.218	220.975	188.626	207.891	188.118	216.349	203.812	207.477	173.347		10.8241	10.3646	10.6849	10.6932	9.25036	10.2691	9.26126	10.732
	BPAG_0000066801	318	-	-	-	-	-		Bm4	Y	WBGene00220265	Bm4	Bm4 [Source:UniProtKB/TrEMBL;Acc:A0A0J9XLR8]	1.8e-75	100	105		126	168	136	128	167	162	172	142	202	163	160		142.779	163.973	134.899	137.975	190.913	130.536	162.595	134.155	180.57	166.595	171.207		32.8449	37.7596	31.6553	31.9978	44.8693	30.902	38.3622	31.8927
	BPAG_0000066901	351	-	GO:0005786 - CC - signal recognition particle, endoplasmic reticulum targeting; GO:0006614 - BP - SRP-dependent cotranslational protein targeting to membrane; GO:0008312 - MF - 7S RNA binding; GO:0030942 - MF - endoplasmic reticulum signal peptide binding; GO:0048500 - CC - signal recognition particle	02044: Secretion system; 03060: Protein export	K03104: signal recognition particle subunit SRP14	-		Bm3580a	Y	WBGene00223841	Bm3580	Bm3580, isoform b; Bm3580, isoform c [Source:UniProtKB/TrEMBL;Acc:A0A0J9XKY9]	2.7e-80	100	116		505	544	558	485	423	702	558	526	593	480	470		572.25	530.962	553.481	522.794	483.569	565.656	527.487	496.94	530.089	490.586	502.92		119.264	110.774	117.669	109.843	102.966	121.319	112.753	107.031
	BPAG_0000067001	797	IPR001304: C-type lectin-like; IPR016186: C-type lectin-like/link domain superfamily; IPR016187: C-type lectin fold	-	-	-	-		Bm7683	Y	WBGene00227944	Bm7683	C-type lectin domain-containing protein [Source:UniProtKB/TrEMBL;Acc:A0A4E9FUC3]	1.2e-173	96.6	233		38	28	30	32	15	39	27	29	49	20	24		43.0604	27.3289	29.757	34.4937	17.1478	31.4253	25.5236	27.3978	43.8016	20.4411	25.681		3.9523	2.51099	2.7861	3.19175	1.60802	2.96828	2.40274	2.59878
	BPAG_0000067101	246	-	-	-	-	-		-	-	-	-	-	-	-	-		30	37	24	17	26	17	47	7	22	10	19		33.9951	36.1132	23.8056	18.3248	29.7229	13.6982	44.4299	6.61327	19.666	10.2205	20.3308		10.1091	10.7501	7.22122	5.49353	9.03021	4.19191	13.5508	2.03232
	BPAG_0000067201	1911	-	-	03019: Messenger RNA biogenesis	K18729: protein angel	-		Bm6147	Y	WBGene00226408	Bma-angl-1	Endonuclease/Exonuclease/phosphatase family protein [Source:UniProtKB/TrEMBL;Acc:A0A4E9FQT2]	0	97.7	611		1320	1556	1543	1345	1310	1697	1645	1575	1596	1472	1528		1495.78	1518.71	1530.5	1449.81	1497.58	1367.4	1555.05	1487.99	1426.68	1504.46	1635.03		57.2582	58.1961	59.764	55.9499	58.5693	53.8666	61.053	58.864
	BPAG_0000067301	507	IPR000535: Major sperm protein (MSP) domain; IPR008962: PapD-like superfamily; IPR013783: Immunoglobulin-like fold	-	-	-	-		Bm7685	Y	WBGene00227946	Bm7685	Major sperm protein [Source:UniProtKB/TrEMBL;Acc:A0A4E9FRW4]	1.1e-122	97.6	168		2	0	1	3	3	2	2	1	3	1	0		2.26634	0	0.991902	3.23378	3.42957	1.61155	1.89063	0.944753	2.68173	1.02205	0		0.326999	0	0.145991	0.470382	0.50556	0.239288	0.279785	0.140871
	BPAG_0000067401	582	-	-	-	-	-		Bm7687	Y	WBGene00227948	Bm7687	Bm7687 [Source:UniProtKB/TrEMBL;Acc:A0A0H5S0A3]	5.7e-98	74.8	226		13	28	19	15	16	29	16	13	23	18	8		14.7312	27.3289	18.8461	16.1689	18.291	23.3675	15.1251	12.2818	20.56	18.397	8.56035		1.85159	3.43859	2.41638	2.04883	2.34886	3.02255	1.94984	1.59533
	BPAG_0000067501	2649	IPR022233: TRAPP II complex, TRAPPC10	-	-	-	-		Bm7049a	Y	WBGene00227310	Bma-trpp-10	Bm7049, isoform f [Source:UniProtKB/TrEMBL;Acc:A0A5S6PU17]	0	93.9	891		310	329	336	347	341	523	422	408	318	385	384		351.282	321.115	333.279	374.041	389.827	421.421	398.924	385.459	284.264	393.491	410.897		9.70072	8.87685	9.3884	10.4132	10.9985	11.9762	11.2988	11.0004
	BPAG_0000067601	1122	IPR015883: Glycoside hydrolase family 20, catalytic domain; IPR017853: Glycoside hydrolase superfamily	GO:0004553 - MF - hydrolase activity, hydrolyzing O-glycosyl compounds; GO:0005975 - BP - carbohydrate metabolic process	00511: Other glycan degradation; 00513: Various types of N-glycan biosynthesis	K14459: hexosaminidase	-		Bm6721	Y	WBGene00226982	Bma-hex-4	BMA-HEX-4 [Source:UniProtKB/TrEMBL;Acc:A0A0H5S1K5]	1.6e-217	99	296		146	129	164	142	165	215	173	243	238	243	196		165.443	125.908	162.672	153.066	188.626	173.242	163.54	229.575	212.751	248.359	209.728		10.7866	8.21754	10.819	10.0608	12.5647	11.6237	10.9359	15.4683
	BPAG_0000067701	1227	-	-	-	-	-		Bm8671	Y	WBGene00228932	Bm8671	Bm8671 [Source:UniProtKB/TrEMBL;Acc:A0A0K0JWM5]	1.2e-278	98.5	408		165	193	154	176	119	188	178	168	230	212	184		186.973	188.374	152.753	189.715	136.039	151.486	168.266	158.719	205.6	216.675	196.888		11.1471	11.2424	9.28989	11.4026	8.28633	9.29419	10.2891	9.779
	BPAG_0000067801	3096	-	GO:0003676 - MF - nucleic acid binding; GO:0008270 - MF - zinc ion binding	03041: Spliceosome	K13203: zinc finger RNA-binding protein	-		Bm7203a	Y	WBGene00227464	Bm7203	Bm7203 [Source:UniProtKB/TrEMBL;Acc:A0A5S6PUH3]	0	96.4	978		1972	2281	2293	2339	2292	3033	2636	2541	2508	2013	2221		2234.61	2226.33	2274.43	2521.27	2620.19	2443.92	2491.86	2400.62	2241.93	2057.39	2376.57		52.7995	52.6586	54.8198	60.0574	63.2519	59.425	60.3874	58.6183
	BPAG_0000067901	393	IPR008195: Ribosomal protein L34Ae; IPR018065: Ribosomal protein L34e, conserved site; IPR038562: Ribosomal protein L34Ae superfamily	GO:0003735 - MF - structural constituent of ribosome; GO:0005622 - CC - intracellular; GO:0005840 - CC - ribosome; GO:0006412 - BP - translation	03010: Ribosome; 03011: Ribosome	K02915: large subunit ribosomal protein L34e	-		Bm2708	Y	WBGene00222969	Bma-rpl-34	60S ribosomal protein L34, putative [Source:UniProtKB/TrEMBL;Acc:A0A4E9FEI7]	2.8e-74	100	114		4374	4646	4614	4108	3434	4389	4082	4050	4515	3382	3319		4956.48	4534.65	4576.63	4428.12	3925.71	3536.56	3858.78	3826.25	4036.01	3456.58	3551.47		922.594	844.951	868.999	830.951	746.565	677.44	736.686	736.024
	BPAG_0000068001	609	IPR001353: Proteasome, subunit alpha/beta; IPR029055: Nucleophile aminohydrolases, N-terminal; IPR035206: Proteasome subunit beta 2	GO:0004298 - MF - threonine-type endopeptidase activity; GO:0005839 - CC - proteasome core complex; GO:0051603 - BP - proteolysis involved in cellular protein catabolic process	01002: Peptidases and inhibitors; 03050: Proteasome; 03051: Proteasome	K02734: 20S proteasome subunit beta 4	T01A		Bm13670a	Y	WBGene00233931	Bma-pbs-4	Proteasome subunit beta [Source:UniProtKB/TrEMBL;Acc:A0A1P6BL35]	4e-153	100	202		1737	1910	1839	1642	1546	2091	1916	1791	2003	1718	1510		1968.31	1864.22	1824.11	1769.96	1767.37	1684.88	1811.23	1692.05	1790.5	1755.89	1615.77		236.432	224.161	223.511	214.335	216.896	208.274	223.141	210.043
	BPAG_0000068101	1107	IPR004907: ATPase, V1 complex, subunit C; IPR036132: Vacuolar ATP synthase subunit C superfamily	GO:0015078 - MF - hydrogen ion transmembrane transporter activity; GO:0015991 - BP - ATP hydrolysis coupled proton transport; GO:0033180 - CC - proton-transporting V-type ATPase, V1 domain	-	-	-		Bm8670	Y	WBGene00228931	Bm8670	V-type proton ATPase subunit C [Source:UniProtKB/TrEMBL;Acc:A0A4E9FRL4]	1.9e-266	98.6	368		1394	1768	1692	1617	1423	2095	1639	2207	1788	1521	1614		1579.64	1725.63	1678.3	1743.01	1626.76	1688.1	1549.37	2085.07	1598.31	1554.54	1727.05		104.385	114.151	113.132	116.118	109.829	114.798	105.011	142.392
	BPAG_0000068201	912	-	-	-	-	-		Bm8669	Y	WBGene00228930	Bm8669	Bm8669 [Source:UniProtKB/TrEMBL;Acc:A0A0J9XN33]	6.2e-230	98.7	303		674	827	822	903	850	1243	937	1004	1130	918	1107		763.756	807.179	815.343	973.368	971.711	1001.58	885.762	948.532	1010.12	938.245	1184.54		61.2617	64.812	66.7131	78.7101	79.6313	82.675	72.8696	78.6264
	BPAG_0000068301	810	IPR023584: Ribosome recycling factor domain; IPR036191: RRF superfamily	-	-	-	-		Bm5866	Y	WBGene00226127	Bma-mrrf-1	Ribosome recycling factor family protein [Source:UniProtKB/TrEMBL;Acc:A0A4E9FE80]	1.2e-187	98.9	269		827	908	855	846	737	1093	985	883	943	968	869		937.13	886.238	848.076	911.926	842.53	880.714	931.137	834.217	842.958	989.348	929.868		84.634	80.1209	78.1295	83.0277	77.7396	81.8527	86.2488	77.8584
	BPAG_0000068401	921	-	-	04512: ECM-receptor interaction	K23379: -	-		Bm4806a	N	WBGene00225067	Bma-bli-4	Endoprotease bli-4, putative [Source:UniProtKB/TrEMBL;Acc:A0A4E9FK37]	2.3e-208	98.2	285		182	232	202	205	216	316	265	332	321	253	277		206.237	226.44	200.364	220.975	246.929	254.626	250.509	313.658	286.945	258.58	296.402		16.3808	18.0042	16.234	17.6942	20.038	20.8126	20.4074	25.7459
	BPAG_0000068501	312	-	-	-	-	-		-	-	-	-	-	-	-	-		22	26	28	27	34	46	30	33	35	36	39		24.9297	25.3768	27.7732	29.104	38.8684	37.0657	28.3595	31.1769	31.2869	36.7939	41.7317		5.8451	5.95612	6.64259	6.87934	9.31074	8.94337	6.81975	7.55421
	BPAG_0000068601	2076	IPR000209: Peptidase S8/S53 domain; IPR002884: P domain; IPR008979: Galactose-binding-like domain superfamily; IPR015500: Peptidase S8, subtilisin-related; IPR022398: Peptidase S8, subtilisin, His-active site; IPR023827: Peptidase S8, subtilisin, Asp-active site; IPR023828: Peptidase S8, subtilisin, Ser-active site; IPR032815: Peptidase S8, pro-domain; IPR034182: Kexin/furin catalytic domain; IPR…	GO:0004252 - MF - serine-type endopeptidase activity; GO:0006508 - BP - proteolysis	-	-	S08B		Bm4806a	Y	WBGene00225067	Bma-bli-4	Endoprotease bli-4, putative [Source:UniProtKB/TrEMBL;Acc:A0A4E9FK37]	0	99.7	691		265	374	376	332	394	616	443	488	450	372	482		300.29	365.036	372.955	357.872	450.416	496.359	418.775	461.04	402.26	380.204	515.761		10.5814	12.8762	13.4059	12.713	16.2154	17.9991	15.1349	16.7889
	BPAG_0000068701	234	-	-	-	-	-		-	-	-	-	-	-	-	-		3	3	1	0	1	0	6	1	5	2	3		3.39951	2.9281	0.991902	0	1.14319	0	5.6719	0.944753	4.46955	2.04411	3.21013		1.06275	0.916326	0.316314	0	0.365127	0	1.8186	0.305221
	BPAG_0000068801	369	-	-	-	-	-		-	-	-	-	-	-	-	-		67	82	72	76	88	82	98	90	71	72	71		75.9223	80.0347	71.4169	81.9224	100.601	66.0737	92.6411	85.0278	63.4677	73.5878	75.9731		15.0513	15.883	14.4424	16.3729	20.3759	13.4799	18.8366	17.4199
	BPAG_0000068901	1587	-	-	04131: Membrane trafficking	K20360: -	-		Bm3757	Y	WBGene00224018	Bma-tbc-3	Rab-GAP TBC domain-containing protein [Source:UniProtKB/TrEMBL;Acc:A0A4E9ESK0]	0	98.9	528		4795	5574	5323	4871	4322	6126	5436	5352	5917	4897	4742		5433.54	5440.41	5279.89	5250.58	4940.86	4936.19	5138.74	5056.32	5289.27	5005	5074.14		250.459	251.035	248.264	243.994	232.685	234.152	242.943	240.862
	BPAG_0000069001	5034	-	GO:0005515 - MF - protein binding	01001: Protein kinases; 04121: Ubiquitin system; 05170: Human immunodeficiency virus 1 infection	K11789: HIV-1 Vpr-binding protein	-		Bm7655a	Y	WBGene00227916	Bma-dcaf-1	BMA-DCAF-1, isoform c [Source:UniProtKB/TrEMBL;Acc:A0A5S6PV58]	0	96	1677		2841	3267	3177	3081	3017	4280	3564	3507	3928	3321	3340		3219.33	3188.7	3151.27	3321.09	3449	3448.73	3369.11	3313.25	3511.28	3394.24	3573.94		46.7824	46.3853	46.713	48.6537	51.2061	51.5737	50.2142	49.7568
	BPAG_0000069101	2340	-	-	01002: Peptidases and inhibitors; 04121: Ubiquitin system	K11862: ubiquitin thioesterase ZRANB1	C64		Bm9669a	Y	WBGene00229930	Bm9669	Bm9669 [Source:UniProtKB/TrEMBL;Acc:A0A0H5S5J0]	0	86.8	779		4421	5518	5260	4960	4865	6852	6076	5939	6264	5410	5221		5009.74	5385.75	5217.4	5346.52	5561.61	5521.19	5743.75	5610.89	5599.46	5529.31	5586.7		156.613	168.543	166.381	168.501	177.634	177.623	184.164	181.271
	BPAG_0000069201	3396	-	GO:0005515 - MF - protein binding	-	-	-		Bm4955a	Y	WBGene00225216	Bma-rig-1	BMA-RIG-1, isoform l [Source:UniProtKB/TrEMBL;Acc:A0A5S6PP77]	0	95.4	1037		1957	2339	2316	1917	1955	2790	2499	2354	2393	2118	2030		2217.61	2282.94	2297.24	2066.39	2234.93	2248.12	2362.35	2223.95	2139.13	2164.71	2172.19		47.7691	49.2275	50.4783	44.8737	49.1857	49.835	52.1916	49.5072
	BPAG_0000069301	210	-	-	-	-	-		-	-	-	-	-	-	-	-		5	12	13	7	6	9	11	10	5	3	3		5.66584	11.7124	12.8947	7.54549	6.85913	7.25199	10.3985	9.44753	4.46955	3.06616	3.21013		1.97367	4.0842	4.58203	2.64982	2.44113	2.59969	3.71514	3.40103
	BPAG_0000069401	479	-	-	-	-	-		Bm14774	Y	WBGene00234959	Bm14774	Bm14774 [Source:UniProtKB/TrEMBL;Acc:A0A0J9XTW9]	6.6e-52	92	88		1	11	4	3	6	4	9	2	3	6	2		1.13317	10.7364	3.96761	3.23378	6.85913	3.22311	8.50785	1.88951	2.68173	6.13232	2.14009		0.173057	1.64135	0.6181	0.497878	1.07023	0.50655	1.33263	0.298211
	BPAG_0000069501	3165	IPR000719: Protein kinase domain; IPR001245: Serine-threonine/tyrosine-protein kinase, catalytic domain; IPR008266: Tyrosine-protein kinase, active site; IPR011009: Protein kinase-like domain superfamily; IPR015943: WD40/YVTN repeat-like-containing domain superfamily; IPR020635: Tyrosine-protein kinase, catalytic domain	GO:0004672 - MF - protein kinase activity; GO:0004713 - MF - protein tyrosine kinase activity; GO:0005515 - MF - protein binding; GO:0005524 - MF - ATP binding; GO:0006468 - BP - protein phosphorylation	01001: Protein kinases; 01521: EGFR tyrosine kinase inhibitor resistance; 04010: MAPK signaling pathway; 04014: Ras signaling pathway; 04015: Rap1 signaling pathway; 04151: PI3K-Akt signaling pathway; 04360: Axon guidance; 04361: Axon regeneration; 04510: Focal adhesion; 04520: Adherens junction; 05100: Bacterial invasion of epithelial cells; 05120: Epithelial cell signaling in Helicobacter pylor…	K05099: proto-oncogene tyrosine-protein kinase Met	-		Bm5789a	Y	WBGene00226050	Bma-svh-2	Protein kinase domain-containing protein [Source:UniProtKB/TrEMBL;Acc:A0A4E9ESJ0]	0	96.8	1054		830	906	905	806	761	1084	1059	890	738	779	741		940.53	884.286	897.671	868.809	869.967	873.462	1001.09	840.83	659.706	796.18	792.902		21.7385	20.4597	21.1646	20.2441	20.5433	20.7756	23.7314	20.0838
	BPAG_0000069601	2811	-	GO:0005515 - MF - protein binding	-	-	-		Bm9671	Y	WBGene00229932	Bm9671	Bm9671 [Source:UniProtKB/TrEMBL;Acc:A0A0J9XTR0]	0	89.7	995		6183	7152	6295	6305	5657	8049	6874	6848	6974	6331	5827		7006.38	6980.58	6244.02	6796.33	6467.02	6485.7	6498.11	6469.67	6234.13	6470.62	6235.14		182.332	181.849	165.756	178.304	171.943	173.692	173.44	173.993
	BPAG_0000069701	252	-	-	-	-	-		-	-	-	-	-	-	-	-		5	0	5	5	1	11	5	7	6	6	4		5.66584	0	4.95951	5.38963	1.14319	8.86355	4.72659	6.61327	5.36347	6.13232	4.28017		1.64473	0	1.4686	1.57727	0.339046	2.64783	1.40725	1.98393
	BPAG_0000069801	993	-	-	-	-	-		Bm9673	Y	WBGene00229934	Bm9673	-	1.2e-163	82.5	286		449	489	486	411	429	626	494	509	463	421	531		508.793	477.28	482.064	443.028	490.428	504.417	466.987	480.879	413.881	430.284	568.193		37.4819	35.1969	36.2261	32.9026	36.912	38.2405	35.2841	36.6099
	BPAG_0000069901	234	-	-	-	-	-		-	-	-	-	-	-	-	-		82	114	111	105	89	108	113	144	145	101	125		92.9198	111.268	110.101	113.182	101.744	87.0239	106.821	136.044	129.617	103.227	133.755		29.0484	34.8204	35.1108	35.6706	32.4963	27.9966	34.2503	43.9518
	BPAG_0000070001	225	-	-	-	-	-		-	-	-	-	-	-	-	-		0	2	3	0	1	2	2	0	1	2	2		0	1.95207	2.9757	0	1.14319	1.61155	1.89063	0	0.893911	2.04411	2.14009		0	0.63532	0.9869	0	0.379732	0.539195	0.630448	0
	BPAG_0000070101	222	-	-	-	-	-		Bm9674	Y	WBGene00229935	Bm9674	-	1.3e-09	62.8	43		24	20	21	21	13	25	20	20	16	21	24		27.196	19.5207	20.8299	22.6365	14.8615	20.1444	18.9063	18.8951	14.3026	21.4631	25.681		8.96154	6.43905	7.00165	7.51976	5.00323	6.83101	6.38968	6.43438
	BPAG_0000070201	1482	IPR000301: Tetraspanin; IPR008952: Tetraspanin, EC2 domain superfamily; IPR018499: Tetraspanin/Peripherin	GO:0016021 - CC - integral component of membrane	04147: Exosome	K17346: tetraspanin-33	-		Bm3938	Y	WBGene00224199	Bma-tsp-14	Tetraspanin [Source:UniProtKB/TrEMBL;Acc:A0A4E9ETW4]	0	96.7	480		1416	1808	1573	1438	1431	2002	1816	1695	1616	1572	1497		1604.57	1764.67	1560.26	1550.06	1635.9	1613.17	1716.7	1601.36	1444.56	1606.67	1601.85		79.2026	87.1957	78.5624	77.1344	82.4995	81.9434	86.9099	81.6867
	BPAG_0000070301	216	-	-	-	-	-		Bm10975	Y	WBGene00231236	Bm10975	Bm10975 [Source:UniProtKB/TrEMBL;Acc:A0A0K0IQ66]	4.3e-42	91.4	70		6	12	8	7	8	7	5	8	7	5	11		6.79901	11.7124	7.93521	7.54549	9.14551	5.64044	4.72659	7.55803	6.25738	5.11027	11.7705		2.30262	3.97075	2.74139	2.57621	3.16443	1.96581	1.64179	2.64525
	BPAG_0000070401	246	-	-	-	-	-		-	-	-	-	-	-	-	-		4	6	9	1	2	8	8	8	4	5	5		4.53267	5.8562	8.92711	1.07793	2.28638	6.44622	7.56254	7.55803	3.57564	5.11027	5.35022		1.34787	1.74326	2.70796	0.323149	0.694632	1.97266	2.30652	2.32265
	BPAG_0000070501	1086	IPR000719: Protein kinase domain; IPR008271: Serine/threonine-protein kinase, active site; IPR011009: Protein kinase-like domain superfamily; IPR017441: Protein kinase, ATP binding site	GO:0004672 - MF - protein kinase activity; GO:0005524 - MF - ATP binding; GO:0006468 - BP - protein phosphorylation	01001: Protein kinases; 04010: MAPK signaling pathway; 04015: Rap1 signaling pathway; 04212: Longevity regulating pathway - worm; 04218: Cellular senescence; 04380: Osteoclast differentiation; 04620: Toll-like receptor signaling pathway; 04664: Fc epsilon RI signaling pathway; 04668: TNF signaling pathway; 04750: Inflammatory mediator regulation of TRP channels; 04912: GnRH signaling pathway; 049…	K04433: mitogen-activated protein kinase kinase 6	-		Bm5197a	Y	WBGene00225458	Bma-sek-1	Protein kinase domain-containing protein [Source:UniProtKB/TrEMBL;Acc:A0A4E9ESC8]	1.8e-268	100	352		740	866	834	790	790	1043	960	838	886	718	748		838.545	845.244	827.246	851.562	903.119	840.426	907.504	791.703	792.005	733.834	800.392		56.4841	56.9945	56.8421	57.8275	62.1523	58.2576	62.6965	55.1117
	BPAG_0000070601	915	-	-	-	-	-		Bm10974	Y	WBGene00231235	Bm10974	Bm10974, isoform c [Source:UniProtKB/TrEMBL;Acc:A0A1P6BHZ9]	1.5e-171	84.9	305		476	527	547	529	509	729	630	586	711	633	591		539.388	514.369	542.57	570.223	581.883	587.412	595.55	553.625	635.571	646.96	632.396		43.1231	41.1656	44.2487	45.9592	47.5288	48.3286	48.8339	45.7411
	BPAG_0000070701	1887	-	GO:0004416 - MF - hydroxyacylglutathione hydrolase activity; GO:0016021 - CC - integral component of membrane; GO:0019243 - BP - methylglyoxal catabolic process to D-lactate via S-lactoyl-glutathione	00620: Pyruvate metabolism	K01069: hydroxyacylglutathione hydrolase	-		Bm6299a	Y	WBGene00226560	Bm6299	Bm6299 [Source:UniProtKB/TrEMBL;Acc:A0A5S6PSL3]	6.5e-173	93.5	263		2463	3061	2906	2437	2236	3169	2792	2770	3001	2628	2362		2790.99	2987.64	2882.47	2626.91	2556.17	2553.51	2639.33	2616.97	2682.63	2685.96	2527.44		108.197	115.941	113.988	102.665	101.242	101.87	104.941	104.843
	BPAG_0000070801	1752	-	GO:0016020 - CC - membrane; GO:0030001 - BP - metal ion transport; GO:0046873 - MF - metal ion transmembrane transporter activity	02000: Transporters; 04142: Lysosome; 04216: Ferroptosis; 04978: Mineral absorption	K21398: -	-		Bm13827a	Y	WBGene00234088	Bm13827	Bm13827 [Source:UniProtKB/TrEMBL;Acc:A0A5S6PAM6]	0	97.9	583		2493	3043	2883	2608	2461	3791	3124	3257	3436	2968	2733		2824.99	2970.07	2859.65	2811.23	2813.39	3054.7	2953.17	3077.06	3071.48	3033.45	2924.43		117.954	124.14	121.799	118.334	120.015	131.256	126.467	132.774
	BPAG_0000070901	453	-	-	-	-	-		-	-	-	-	-	-	-	-		123	177	166	147	138	202	166	210	130	125	111		139.38	172.758	164.656	158.455	157.76	162.767	156.923	198.398	116.208	127.757	118.775		22.5077	27.9267	27.1234	25.7963	26.028	27.049	25.9903	33.1094
	BPAG_0000071001	1107	-	GO:0016021 - CC - integral component of membrane; GO:0016567 - BP - protein ubiquitination; GO:0061630 - MF - ubiquitin protein ligase activity	04121: Ubiquitin system	K22380: -	-		Bm10973	Y	WBGene00231234	Bm10973	Bm10973 [Source:UniProtKB/TrEMBL;Acc:A0A0H5SBE5]	9.3e-259	90	391		1398	1706	1644	1323	1254	1921	1592	1582	1582	1327	1350		1584.17	1665.11	1630.69	1426.1	1433.56	1547.9	1504.94	1494.6	1414.17	1356.26	1444.56		104.685	110.148	109.923	95.0057	96.7854	105.263	101.999	102.068
	BPAG_0000071101	243	-	-	04020: Calcium signaling pathway; 04030: G protein-coupled receptors; 04080: Neuroactive ligand-receptor interaction	K04282: thyrotropin-releasing hormone receptor	-		Bm10972	Y	WBGene00231233	Bm10972	Bm10972 [Source:UniProtKB/TrEMBL;Acc:A0A0K0IQ62]	1.1e-52	93.6	78		44	63	51	50	53	61	59	62	55	55	46		49.8594	61.4901	50.587	53.8963	60.589	49.1524	55.7737	58.5747	49.1651	56.2129	49.222		15.0097	18.5302	15.5345	16.3569	18.635	15.2273	17.2206	18.2228
	BPAG_0000071201	411	-	GO:0000786 - CC - nucleosome; GO:0003677 - MF - DNA binding; GO:0046982 - MF - protein heterodimerization activity	03036: Chromosome and associated proteins; 04147: Exosome; 05034: Alcoholism; 05131: Shigellosis; 05202: Transcriptional misregulation in cancer; 05322: Systemic lupus erythematosus	K11253: histone H3	-		Bm4100|Bm4536	Y	WBGene00224361|WBGene00224797	Bm4100|Bm4536	Histone H3 [Source:UniProtKB/TrEMBL;Acc:A0A4E9FFK1]|Histone H3 [Source:UniProtKB/TrEMBL;Acc:A0A4E9FFK1]	7.1e-90	100	136		3045	3536	3347	3061	2729	3584	3213	3119	3428	2570	2752		3450.5	3451.25	3319.89	3299.53	3119.76	2887.91	3037.3	2946.69	3064.33	2626.68	2944.76		614.143	614.915	602.765	592.051	567.311	528.962	554.461	542.005
	BPAG_0000071301	1704	IPR001841: Zinc finger, RING-type; IPR013083: Zinc finger, RING/FYVE/PHD-type; IPR017907: Zinc finger, RING-type, conserved site	-	03036: Chromosome and associated proteins; 04121: Ubiquitin system	K10695: E3 ubiquitin-protein ligase RNF1/2	-		Bm5776a	Y	WBGene00226037	Bma-spat-3	Bm5776 [Source:UniProtKB/TrEMBL;Acc:A0A0K0JKB0]	0	96.1	567		2505	2864	3083	2782	2707	3794	3307	3197	3553	3185	2981		2838.59	2795.36	3058.03	2998.79	3094.61	3057.12	3126.16	3020.38	3176.07	3255.24	3189.8		121.86	120.129	133.918	129.785	135.731	135.06	137.647	133.999
	BPAG_0000071401	6642	IPR005479: Carbamoyl-phosphate synthetase large subunit-like, ATP-binding domain; IPR005481: Biotin carboxylase-like, N-terminal domain; IPR005482: Biotin carboxylase, C-terminal; IPR011054: Rudiment single hybrid motif; IPR011761: ATP-grasp fold; IPR011762: Acetyl-coenzyme A carboxyltransferase, N-terminal; IPR011763: Acetyl-coenzyme A carboxyltransferase, C-terminal; IPR011764: Biotin carboxyla…	GO:0003989 - MF - acetyl-CoA carboxylase activity; GO:0005524 - MF - ATP binding; GO:0006633 - BP - fatty acid biosynthetic process; GO:0016874 - MF - ligase activity; GO:0046872 - MF - metal ion binding	00061: Fatty acid biosynthesis; 00254: Aflatoxin biosynthesis; 00620: Pyruvate metabolism; 00640: Propanoate metabolism; 04152: AMPK signaling pathway; 04910: Insulin signaling pathway; 04920: Adipocytokine signaling pathway; 04922: Glucagon signaling pathway; 04931: Insulin resistance	K01946: -	-		Bm6243	Y	WBGene00226504	Bma-pod-2	BMA-POD-2 [Source:UniProtKB/TrEMBL;Acc:A0A5S6PRT2]	0	96.5	2206		3941	4559	4468	4335	4494	6155	5259	5395	5558	5105	5128		4465.82	4449.73	4431.82	4672.81	5137.49	4959.56	4971.42	5096.94	4968.36	5217.58	5487.18		49.1849	49.0586	49.7907	51.8833	57.8088	56.2118	56.1573	58.0126
	BPAG_0000071501	1068	IPR001680: WD40 repeat; IPR015943: WD40/YVTN repeat-like-containing domain superfamily; IPR036322: WD40-repeat-containing domain superfamily	GO:0005515 - MF - protein binding	04131: Membrane trafficking	K22991: -	-		Bm10971	Y	WBGene00231232	Bm10971	Bm10971 [Source:UniProtKB/TrEMBL;Acc:A0A0K0IQ61]	2e-245	97.1	343		1214	1407	1425	1395	1268	1853	1557	1513	1731	1533	1351		1375.67	1373.28	1413.46	1503.71	1449.56	1493.11	1471.86	1429.41	1547.36	1566.81	1445.63		94.2262	94.1603	98.7593	103.834	101.44	105.245	103.4	101.181
	BPAG_0000071601	225	-	-	-	-	-		Bm5958	N	WBGene00226219	Bm5958	Bm5958 [Source:UniProtKB/TrEMBL;Acc:A0A0H5SQT2]	1.2e-44	98.6	72		60	55	72	79	83	103	104	80	88	87	79		67.9901	53.6818	71.4169	85.1562	94.8847	82.995	98.313	75.5803	78.6642	88.9186	84.5334		22.1051	17.4713	23.6856	27.9114	31.5178	27.7685	32.7833	25.3944
	BPAG_0000071701	279	IPR002557: Chitin binding domain; IPR036508: Chitin binding domain superfamily	GO:0005576 - CC - extracellular region; GO:0006030 - BP - chitin metabolic process; GO:0008061 - MF - chitin binding	-	-	-		Bm628	N	WBGene00220889	Bm628	Chitin-binding type-2 domain-containing protein [Source:UniProtKB/TrEMBL;Acc:A0A4E9F9Q1]	4.5e-39	94.6	56		455	493	505	368	385	533	443	434	498	364	370		515.592	481.184	500.91	396.677	440.128	429.479	418.775	410.023	445.168	372.027	395.916		135.186	126.295	133.974	104.853	117.901	115.883	112.616	111.1
	BPAG_0000071801	759	-	-	-	-	-		Bm9019	Y	WBGene00229280	Bm9019	Bm9019, isoform a [Source:UniProtKB/TrEMBL;Acc:A0A5S6PX36]	7.1e-101	95.7	161		12	21	14	19	18	21	17	11	40	45	14		13.598	20.4967	13.8866	20.4806	20.5774	16.9213	16.0704	10.3923	35.7564	45.9924	14.9806		1.31058	1.97753	1.36528	1.98998	2.02624	1.67832	1.58858	1.0351
	BPAG_0000071901	1731	IPR000504: RNA recognition motif domain; IPR005123: Oxoglutarate/iron-dependent dioxygenase; IPR012677: Nucleotide-binding alpha-beta plait domain superfamily; IPR013216: Methyltransferase type 11; IPR027450: Alpha-ketoglutarate-dependent dioxygenase AlkB-like; IPR029063: S-adenosyl-L-methionine-dependent methyltransferase; IPR035979: RNA-binding domain superfamily; IPR037151: Alpha-ketoglutarate…	GO:0003676 - MF - nucleic acid binding; GO:0008152 - BP - metabolic process; GO:0008168 - MF - methyltransferase activity; GO:0016491 - MF - oxidoreductase activity; GO:0055114 - BP - oxidation-reduction process	03016: Transfer RNA biogenesis	K10770: alkylated DNA repair protein alkB homolog 8	-		Bm2193a	Y	WBGene00222454	Bma-alkb-8	BMA-ALKB-8 [Source:UniProtKB/TrEMBL;Acc:A0A5S6PGP8]	0	99.5	576		861	1121	1008	985	910	1251	1057	1134	966	925	952		975.658	1094.13	999.837	1061.76	1040.3	1008.03	999.2	1071.35	863.518	945.399	1018.68		41.2316	46.2864	43.102	45.2352	44.9163	43.8388	43.3092	46.7892
	BPAG_0000072001	426	IPR004910: Yippee/Mis18/Cereblon; IPR034751: Yippee domain	-	-	-	-		Bm3887	Y	WBGene00224148	Bm3887	-	2.1e-107	100	141		100	138	134	110	131	174	170	155	217	126	173		113.317	134.692	132.915	118.572	149.758	140.205	160.704	146.437	193.979	128.779	185.117		19.4587	23.1534	23.2825	20.5268	26.2737	24.7764	28.3036	25.9867
	BPAG_0000072101	621	-	-	-	-	-		Bm8801a	Y	WBGene00229062	Bm8801	Bm8801 [Source:UniProtKB/TrEMBL;Acc:A0A0K0JX34]	1.6e-129	98.1	206		421	457	407	328	293	449	401	447	403	309	304		477.064	446.047	403.704	353.56	334.954	361.794	379.072	422.305	360.246	315.814	325.293		56.1972	52.598	48.5106	41.9875	40.3121	43.8584	45.7988	51.4098
	BPAG_0000072201	2592	-	GO:0003676 - MF - nucleic acid binding; GO:0005524 - MF - ATP binding	03400: DNA repair and recombination proteins	K19178: -	-		Bm6840	Y	WBGene00227101	Bma-helq-1	Type III restriction enzyme, res subunit family protein [Source:UniProtKB/TrEMBL;Acc:A0A4E9F1C4]	0	94.4	787		689	833	812	822	788	1013	869	919	870	907	819		780.753	813.035	805.424	886.056	900.833	816.252	821.481	868.228	777.703	927.002	876.365		22.0348	22.9697	23.1876	25.2101	25.9747	23.7068	23.7786	25.3227
	BPAG_0000072301	690	IPR019164: Transmembrane protein 147	-	-	-	-		Bm7469	Y	WBGene00227730	Bm7469	Seven transmembrane domain protein, putative [Source:UniProtKB/TrEMBL;Acc:A0A4E9F3M4]	4e-164	100	229		1289	1452	1312	1204	1097	1493	1427	1250	1442	1014	1097		1460.65	1417.2	1301.37	1297.82	1254.08	1203.03	1348.97	1180.94	1289.02	1036.36	1173.84		154.856	150.405	140.74	138.712	135.837	131.253	146.682	129.387
	BPAG_0000072401	2643	IPR001164: Arf GTPase activating protein; IPR001849: Pleckstrin homology domain; IPR002110: Ankyrin repeat; IPR020683: Ankyrin repeat-containing domain; IPR036770: Ankyrin repeat-containing domain superfamily; IPR037278: ARFGAP/RecO-like zinc finger; IPR038508: ArfGAP domain superfamily	GO:0005096 - MF - GTPase activator activity; GO:0005515 - MF - protein binding	04131: Membrane trafficking; 04144: Endocytosis	K12491: Arf-GAP with GTPase, ANK repeat and PH domain-containing protein 1/3	-		Bm6450	Y	WBGene00226711	Bma-cnt-2	GTP-ase activating protein for Arf containing protein [Source:UniProtKB/TrEMBL;Acc:A0A4E9F1K2]	0	97.2	879		2966	3342	3298	3180	2907	3968	3199	3340	3108	3227	3072		3360.98	3261.9	3271.29	3427.81	3323.25	3197.32	3024.07	3155.48	2778.28	3298.17	3287.17		93.0247	90.3762	92.3608	95.6461	93.974	91.0694	85.8458	90.2566
	BPAG_0000072501	402	-	-	-	-	-		-	-	-	-	-	-	-	-		12	22	8	9	11	23	20	16	17	23	8		13.598	21.4727	7.93521	9.70134	12.5751	18.5329	18.9063	15.1161	15.1965	23.5072	8.56035		2.47445	3.91148	1.47298	1.77973	2.3379	3.47056	3.52863	2.84265
	BPAG_0000072601	159	IPR027417: P-loop containing nucleoside triphosphate hydrolase	-	04131: Membrane trafficking; 04144: Endocytosis	K12491: Arf-GAP with GTPase, ANK repeat and PH domain-containing protein 1/3	-		Bm6450	N	WBGene00226711	Bma-cnt-2	GTP-ase activating protein for Arf containing protein [Source:UniProtKB/TrEMBL;Acc:A0A4E9F1K2]	2e-30	100	51		35	54	43	36	34	43	42	48	38	41	52		39.6609	52.7058	42.6518	38.8054	38.8684	34.6484	39.7033	45.3482	33.9686	41.9042	55.6422		18.2472	24.274	20.0173	17.9988	18.2701	16.4047	18.735	21.5612
	BPAG_0000072701	416	-	-	-	-	-		Bm5297	N	WBGene00225558	Bm5297	CULT domain-containing protein [Source:UniProtKB/TrEMBL;Acc:A0A4E9F0B8]	6.9e-42	97.1	70		320	376	361	350	310	386	410	375	427	352	336		362.614	366.988	358.076	377.274	354.389	311.03	387.58	354.282	381.7	359.763	359.535		63.7648	64.601	64.2315	66.8824	63.669	56.2849	69.9024	64.3825
	BPAG_0000072801	5193	-	GO:0005509 - MF - calcium ion binding	04390: Hippo signaling pathway; 04391: Hippo signaling pathway - fly	K16681: protein crumbs	-		Bm3309a	Y	WBGene00223570	Bma-crb-1	BMA-CRB-1 [Source:UniProtKB/TrEMBL;Acc:A0A5S6PK66]	0	98.4	1730		1061	1213	1217	1034	1144	1590	1430	1241	1253	1146	1087		1202.29	1183.93	1207.14	1114.58	1307.81	1281.19	1351.8	1172.44	1120.07	1171.27	1163.14		16.9364	16.695	17.3463	15.8285	18.8221	18.5728	19.5308	17.068
	BPAG_0000072901	201	-	-	-	-	-		-	-	-	-	-	-	-	-		3	7	3	1	3	8	5	2	5	8	6		3.39951	6.83223	2.9757	1.07793	3.42957	6.44622	4.72659	1.88951	4.46955	8.17643	6.42026		1.23723	2.48913	1.10474	0.395495	1.27522	2.4143	1.76431	0.710663
	BPAG_0000073001	684	-	-	-	-	-		-	-	-	-	-	-	-	-		19	27	19	16	11	24	12	21	8	22	13		21.5302	26.3529	18.8461	17.2468	12.5751	19.3387	11.3438	19.8398	7.15129	22.4852	13.9106		2.30262	2.82132	2.05604	1.85952	1.37403	2.1284	1.24431	2.19277
	BPAG_0000073101	2841	-	GO:0019904 - MF - protein domain specific binding	-	-	-		Bm10299a	Y	WBGene00230560	Bm10299	14_3_3 domain-containing protein [Source:UniProtKB/TrEMBL;Acc:A0A4E9EZG7]	0	94.5	949		3246	3735	3734	3788	3826	4991	4128	4240	3675	3810	4112		3678.27	3645.48	3703.76	4083.19	4373.84	4021.63	3902.27	4005.75	3285.12	3894.02	4400.02		94.7112	93.9646	97.2831	105.993	115.062	106.565	103.055	106.592
	BPAG_0000073201	2193	-	-	04131: Membrane trafficking	K20281: -	-		Bm2215	Y	WBGene00222476	Bma-gcc-1	GRIP domain-containing protein [Source:UniProtKB/TrEMBL;Acc:A0A4E9EXY7]	0	95.9	730		2203	2548	2571	2307	2386	3305	2725	2767	2179	2491	2293		2496.37	2486.93	2550.18	2486.78	2727.65	2663.09	2575.99	2614.13	1947.83	2545.94	2453.61		83.2722	83.0435	86.7756	83.627	92.959	91.4178	88.1312	90.1157
	BPAG_0000073301	372	IPR029008: Rab5-interacting protein family	-	04131: Membrane trafficking	K23567: -	-		Bm3791	Y	WBGene00224052	Bma-emc-6	BMA-EMC-6 [Source:UniProtKB/TrEMBL;Acc:A0A0K0JBU7]	5.9e-85	100	123		572	640	666	595	570	739	662	664	651	580	585		648.172	624.661	660.606	641.366	651.618	595.469	625.8	627.316	581.936	592.791	625.975		127.461	122.965	132.515	127.149	130.916	120.503	126.217	127.484
	BPAG_0000073401	303	-	-	-	-	-		-	-	-	-	-	-	-	-		16	24	15	21	23	30	24	19	14	22	11		18.1307	23.4248	14.8785	22.6365	26.2933	24.1733	22.6876	17.9503	12.5148	22.4852	11.7705		4.37725	5.66126	3.66423	5.50952	6.48552	6.00588	5.61785	4.47858
	BPAG_0000073501	810	-	-	-	-	-		Bm3820a	N	WBGene00224081	Bm3820	Bm3820, isoform d [Source:UniProtKB/TrEMBL;Acc:A0A5S6PL25]	4.7e-151	89.5	267		81	78	75	78	74	92	85	85	78	87	76		91.7867	76.1305	74.3926	84.0783	84.596	74.1315	80.352	80.304	69.7251	88.9186	81.3233		8.28942	6.88263	6.85347	7.65503	7.8056	6.88971	7.44279	7.49486
	BPAG_0000073601	1197	-	-	-	-	-		Bm3820a	N	WBGene00224081	Bm3820	Bm3820, isoform d [Source:UniProtKB/TrEMBL;Acc:A0A5S6PL25]	7.5e-204	97.1	314		505	526	537	437	481	646	571	505	438	443	458		572.25	513.393	532.651	471.054	549.874	520.532	539.776	477.1	391.533	452.77	490.08		34.9721	31.4077	33.2058	29.0218	34.3329	32.7368	33.8333	30.1319
	BPAG_0000073701	1848	-	-	-	-	-		Bm3820a	Y	WBGene00224081	Bm3820	Bm3820, isoform d [Source:UniProtKB/TrEMBL;Acc:A0A5S6PL25]	0	94.7	546		2586	2792	2682	2441	2117	2810	2546	2333	2109	2262	1961		2930.37	2725.08	2660.28	2631.22	2420.13	2264.23	2406.78	2204.11	1885.26	2311.88	2098.35		115.998	107.984	107.421	105.003	97.8766	92.2364	97.7143	90.1659
	BPAG_0000073801	1539	IPR017942: Lipid-binding serum glycoprotein, N-terminal; IPR017943: Bactericidal permeability-increasing protein, alpha/beta domain superfamily	GO:0008289 - MF - lipid binding	-	-	-		Bm3266	Y	WBGene00223527	Bm3266	Bm3266 [Source:UniProtKB/TrEMBL;Acc:A0A0H5S9F2]	0	98.3	464		4	8	6	9	8	15	6	9	6	8	5		4.53267	7.80826	5.95141	9.70134	9.14551	12.0867	5.6719	8.50278	5.36347	8.17643	5.35022		0.21545	0.371532	0.288567	0.464881	0.444131	0.591222	0.276512	0.41767
	BPAG_0000073901	1191	IPR000719: Protein kinase domain; IPR003527: Mitogen-activated protein (MAP) kinase, conserved site; IPR011009: Protein kinase-like domain superfamily; IPR017441: Protein kinase, ATP binding site	GO:0004672 - MF - protein kinase activity; GO:0004707 - MF - MAP kinase activity; GO:0005524 - MF - ATP binding; GO:0006468 - BP - protein phosphorylation	01001: Protein kinases; 01522: Endocrine resistance; 04010: MAPK signaling pathway; 04011: MAPK signaling pathway - yeast; 04013: MAPK signaling pathway - fly; 04015: Rap1 signaling pathway; 04068: FoxO signaling pathway; 04071: Sphingolipid signaling pathway; 04114: Oocyte meiosis; 04139: Mitophagy - yeast; 04212: Longevity regulating pathway - worm; 04218: Cellular senescence; 04261: Adrenergic…	K04441: p38 MAP kinase	-		Bm4029b	Y	WBGene00224290	Bma-pmk-3	Mitogen-activated protein kinase [Source:UniProtKB/TrEMBL;Acc:A0A4E9EUC5]	3.6e-275	100	370		476	578	505	478	394	558	471	525	510	482	419		539.388	564.147	500.91	515.249	450.416	449.624	445.244	495.995	455.895	492.63	448.348		33.1298	34.6865	31.3844	31.9046	28.2647	28.4198	28.0486	31.4831
	BPAG_0000074001	249	-	-	-	-	-		-	-	-	-	-	-	-	-		19	31	63	33	32	45	47	41	41	33	39		21.5302	30.257	62.4898	35.5716	36.582	36.26	44.4299	38.7349	36.6503	33.7278	41.7317		6.32526	8.8983	18.7273	10.5354	10.9802	10.9625	13.3875	11.7602
	BPAG_0000074101	1203	-	-	-	-	-		Bm4030	Y	WBGene00224291	Bma-islo-1	BMA-ISLO-1 [Source:UniProtKB/TrEMBL;Acc:A0A0H5SER6]	4e-198	77	395		666	804	765	658	627	917	839	833	782	863	793		754.69	784.73	758.805	709.276	716.779	738.898	793.121	786.98	699.038	882.032	848.544		45.8916	47.7678	47.0685	43.4808	44.5309	46.2383	49.465	49.4549
	BPAG_0000074201	486	IPR009069: Cysteine alpha-hairpin motif superfamily; IPR010625: CHCH	-	-	-	-		Bm2338a	Y	WBGene00222599	Bm2338	Bm2338, isoform a [Source:UniProtKB/TrEMBL;Acc:A0A0J9XMZ0]	2.2e-121	99.4	161		1231	1287	1334	1191	1058	1449	1200	1313	1407	1117	1164		1394.93	1256.15	1323.2	1283.81	1209.49	1167.57	1134.38	1240.46	1257.73	1141.63	1245.53		209.965	189.272	203.167	194.811	185.998	180.855	175.124	192.956
	BPAG_0000074301	1149	-	GO:0003747 - MF - translation release factor activity; GO:0006415 - BP - translational termination	03012: Translation factors	K02835: peptide chain release factor 1	-		Bm13972a	Y	WBGene00234233	Bm13972	Peptidyl-tRNA hydrolase domain containing protein [Source:UniProtKB/TrEMBL;Acc:A0A4E9EV55]	8.1e-275	99.2	382		2833	3349	3039	2691	2352	3193	2840	2774	2764	2559	2395		3210.27	3268.73	3014.39	2900.7	2688.78	2572.85	2684.7	2620.75	2470.77	2615.43	2562.75		204.386	208.324	195.769	186.179	174.895	168.569	175.307	172.431
	BPAG_0000074401	1929	IPR000904: Sec7 domain; IPR011993: PH-like domain superfamily; IPR023394: Sec7, C-terminal domain superfamily; IPR033742: IQ motif and SEC7 domain-containing protein, PH domain; IPR035999: Sec7 domain superfamily	GO:0005086 - MF - ARF guanyl-nucleotide exchange factor activity; GO:0032012 - BP - regulation of ARF protein signal transduction	04131: Membrane trafficking; 04144: Endocytosis	K12495: IQ motif and SEC7 domain-containing protein	-		Bm5066	Y	WBGene00225327	Bma-bris-1	Loner ISO1, putative [Source:UniProtKB/TrEMBL;Acc:A0A4E9EU49]	0	98.6	648		1145	1546	1378	1437	1389	1886	1610	1635	1939	1604	1493		1297.48	1508.95	1366.84	1548.98	1587.89	1519.7	1521.96	1544.67	1733.29	1639.37	1597.57		49.2037	57.2825	52.8751	59.2191	61.5219	59.3072	59.1964	60.5362
	BPAG_0000074501	300	-	-	-	-	-		Bm8534	Y	WBGene00228795	Bm8534	Bm8534 [Source:UniProtKB/TrEMBL;Acc:A0A0K0JW65]	9.3e-64	99	99		665	682	727	643	508	748	648	715	744	618	598		753.557	665.654	721.113	693.107	580.74	602.721	612.566	675.499	665.07	631.629	639.886		183.749	162.483	179.369	170.383	144.678	151.244	153.199	170.222
	BPAG_0000074601	2634	-	GO:0000139 - CC - Golgi membrane; GO:0005488 - MF - binding; GO:0005737 - CC - cytoplasm; GO:0006886 - BP - intracellular protein transport; GO:0008565 - MF - protein transporter activity; GO:0016020 - CC - membrane; GO:0048280 - BP - vesicle fusion with Golgi apparatus	-	-	-		Bm4948	Y	WBGene00225209	Bma-uso-1	Uso1 / p115 like vesicle tethering protein, head region containing protein [Source:UniProtKB/TrEMBL;Acc:A0A4E9EVL9]	0	99.2	877		3257	3775	3716	3334	3227	4633	3838	3729	3345	3318	3170		3690.73	3684.52	3685.91	3593.81	3689.07	3733.17	3628.13	3522.99	2990.13	3391.17	3392.04		102.501	102.434	104.423	100.621	104.675	106.695	103.345	101.113
	BPAG_0000074701	4950	-	GO:0003774 - MF - motor activity; GO:0003777 - MF - microtubule motor activity; GO:0005515 - MF - protein binding; GO:0005524 - MF - ATP binding; GO:0007018 - BP - microtubule-based movement; GO:0008017 - MF - microtubule binding; GO:0016459 - CC - myosin complex	04131: Membrane trafficking; 04812: Cytoskeleton proteins	K10362: myosin XVIII	-		Bm8533a	Y	WBGene00228794	Bm8533	Myosin XVIIIA, putative [Source:UniProtKB/TrEMBL;Acc:A0A4E9EUB7]	0	96.2	1646		2517	3170	3235	2714	3369	4463	3613	3413	2325	3008	3163		2852.19	3094.02	3208.8	2925.49	3851.4	3596.18	3415.43	3224.44	2078.34	3074.34	3384.55		42.1505	45.7719	48.373	43.5855	58.1508	54.6915	51.7684	49.2449
	BPAG_0000074801	528	IPR005225: Small GTP-binding protein domain; IPR006689: Small GTPase superfamily, ARF/SAR type; IPR024156: Small GTPase superfamily, ARF type; IPR027417: P-loop containing nucleoside triphosphate hydrolase	GO:0005525 - MF - GTP binding; GO:0005622 - CC - intracellular	04014: Ras signaling pathway; 04031: GTP-binding proteins; 04072: Phospholipase D signaling pathway; 04131: Membrane trafficking; 04144: Endocytosis; 04147: Exosome; 04666: Fc gamma R-mediated phagocytosis; 05130: Pathogenic Escherichia coli infection; 05132: Salmonella infection; 05135: Yersinia infection	K07941: ADP-ribosylation factor 6	-		Bm7308	Y	WBGene00227569	Bma-arf-6	ADP-ribosylation factor 6, putative [Source:UniProtKB/TrEMBL;Acc:A0A4E9EU06]	1.5e-128	100	175		695	716	806	813	667	992	766	788	952	810	799		787.552	698.839	799.473	876.354	762.507	799.331	724.113	744.466	851.003	827.863	854.965		109.113	96.9224	112.989	122.404	107.932	113.966	102.896	106.591
	BPAG_0000074901	411	-	-	-	-	-		-	-	-	-	-	-	-	-		144	209	223	152	184	253	211	187	304	223	194		163.176	203.991	221.194	163.845	210.347	203.862	199.462	176.669	271.749	227.918	207.588		29.0432	36.3454	40.1603	29.3995	38.2504	37.3402	36.4118	32.496
	BPAG_0000075001	186	-	-	-	-	-		Bm177	Y	WBGene00220438	Bm177	Bm177 [Source:UniProtKB/TrEMBL;Acc:A0A0K0J302]	1.8e-21	90.2	41		102	135	113	92	96	106	92	67	158	120	120		115.583	131.764	112.085	99.1693	109.746	85.4124	86.9692	63.2985	141.238	122.646	128.405		45.4581	51.8759	44.9676	39.3199	44.0979	34.5693	35.0814	25.7271
	BPAG_0000075101	633	-	GO:0003676 - MF - nucleic acid binding	-	-	-		Bm6442	Y	WBGene00226703	Bma-fezf-1	BMA-FEZF-1 [Source:UniProtKB/TrEMBL;Acc:A0A0K0JN63]	1.6e-40	96.7	61		9	23	9	13	11	17	12	11	22	12	17		10.1985	22.4487	8.92711	14.013	12.5751	13.6982	11.3438	10.3923	19.666	12.2646	18.1907		1.17859	2.59698	1.05238	1.63259	1.48473	1.62908	1.34456	1.24113
	BPAG_0000075201	2082	IPR013320: Concanavalin A-like lectin/glucanase domain superfamily	-	-	-	-		Bm11685	Y	WBGene00231946	Bma-mam-3	-	0	94.7	717		141	194	142	171	155	256	172	131	265	165	141		159.777	189.35	140.85	184.325	177.194	206.279	162.595	123.763	236.886	168.639	150.876		5.61387	6.65987	5.04826	6.52909	6.36079	7.4586	5.85935	4.49387
	BPAG_0000075301	2460	-	GO:0005515 - MF - protein binding; GO:0007155 - BP - cell adhesion; GO:0016020 - CC - membrane	00536: Glycosaminoglycan binding proteins; 00537: Glycosylphosphatidylinositol (GPI)-anchored proteins; 04090: CD molecules; 04131: Membrane trafficking; 04514: Cell adhesion molecules (CAMs); 04515: Cell adhesion molecules; 05020: Prion diseases	K06491: neural cell adhesion molecule	-		Bm8222a	Y	WBGene00228483	Bma-ncam-1	Immunoglobulin I-set domain containing protein [Source:UniProtKB/TrEMBL;Acc:A0A4E9EVL4]	0	94.5	795		2106	2507	2362	2159	2268	3166	2606	2578	2442	2553	2281		2386.45	2446.91	2342.87	2327.24	2592.75	2551.09	2463.5	2435.57	2182.93	2609.3	2440.77		70.9655	72.839	71.0688	69.7678	78.7712	78.0681	75.1348	74.8475
	BPAG_0000075401	1170	IPR004947: Deoxyribonuclease II	GO:0004531 - MF - deoxyribonuclease II activity; GO:0006259 - BP - DNA metabolic process	04142: Lysosome	K01158: deoxyribonuclease II	-		Bm3246a|Bm17983	Y	WBGene00223507|WBGene00269125	Bma-crn-7.3|Bma-crn-7.1	|	8.4e-256	98.3	346		160	98	93	121	86	156	103	93	129	151	114		181.307	95.6512	92.2469	130.429	98.3142	125.701	97.3677	87.8621	115.315	154.33	121.985		11.336	5.98667	5.88344	8.22123	6.28018	8.08792	6.24386	5.6771
	BPAG_0000075501	1245	-	-	-	-	-		Bm3240a	Y	WBGene00223501	Bm3240	Bm3240, isoform a; Bm3240, isoform b [Source:UniProtKB/TrEMBL;Acc:A0A0J9XN59]	8.5e-278	94.3	400		1243	1465	1390	1369	1194	1672	1371	1380	1524	1244	1156		1408.53	1429.89	1378.74	1475.68	1364.97	1347.26	1296.03	1303.76	1362.32	1271.43	1236.97		82.7611	84.1033	82.638	87.4121	81.9398	81.4639	78.1034	79.1661
	BPAG_0000075601	939	-	-	-	-	-		Bm13371	Y	WBGene00233632	Bm13371	Bm13371 [Source:UniProtKB/TrEMBL;Acc:A0A0H5S2Q0]	3.1e-152	98.5	205		392	514	506	486	470	672	595	552	640	517	506		444.202	501.681	501.902	523.872	537.299	541.482	562.464	521.504	572.103	528.402	541.442		34.6055	39.1239	39.8859	41.1442	42.7654	43.4112	44.9421	41.9859
	BPAG_0000075701	1929	IPR000169: Cysteine peptidase, cysteine active site; IPR001300: Peptidase C2, calpain, catalytic domain; IPR022682: Peptidase C2, calpain, large subunit, domain III; IPR022683: Peptidase C2, calpain, domain III; IPR022684: Peptidase C2, calpain family; IPR035892: C2 domain superfamily; IPR036213: Calpain large subunit, domain III superfamily	GO:0004198 - MF - calcium-dependent cysteine-type endopeptidase activity; GO:0005622 - CC - intracellular; GO:0006508 - BP - proteolysis	01002: Peptidases and inhibitors	K08574: calpain-5	C02A		Bm5028a	Y	WBGene00225289	Bma-tra-3	Calpain catalytic domain-containing protein [Source:UniProtKB/TrEMBL;Acc:A0A4E9EVD3]	0	98.1	642		1919	2176	2129	1661	1649	2337	2052	1999	1695	1636	1745		2174.55	2123.85	2111.76	1790.44	1885.12	1883.1	1939.79	1888.56	1515.18	1672.08	1867.23		82.4645	80.6253	81.6916	68.4502	73.0379	73.4894	75.4479	74.0134
	BPAG_0000075801	543	-	GO:0006470 - BP - protein dephosphorylation; GO:0008138 - MF - protein tyrosine/serine/threonine phosphatase activity; GO:0016311 - BP - dephosphorylation; GO:0016791 - MF - phosphatase activity	01009: Protein phosphatases and associated proteins	K14165: atypical dual specificity phosphatase	-		Bm3337	Y	WBGene00223598	Bm3337	Bm3337 [Source:UniProtKB/TrEMBL;Acc:A0A0H5S149]	4.2e-124	98.8	169		868	1045	982	808	724	1064	930	861	837	742	727		983.59	1019.95	974.047	870.965	827.669	857.347	879.145	813.433	748.203	758.364	777.921		132.509	137.55	133.858	118.29	113.92	118.861	121.474	113.249
	BPAG_0000075901	996	-	GO:0000413 - BP - protein peptidyl-prolyl isomerization; GO:0003755 - MF - peptidyl-prolyl cis-trans isomerase activity; GO:0006457 - BP - protein folding	03041: Spliceosome; 03110: Chaperones and folding catalysts	K12734: peptidyl-prolyl cis-trans isomerase-like 3	-		Bm1725	Y	WBGene00221986	Bma-cyn-10	PPIase cyclophilin-type domain-containing protein [Source:UniProtKB/TrEMBL;Acc:A0A4E9EUV0]	1.8e-218	87.8	360		1475	1655	1623	1529	1382	1986	1666	1610	2020	1523	1482		1671.42	1615.33	1609.86	1648.15	1579.89	1600.27	1574.9	1521.05	1805.7	1556.59	1585.8		122.76	118.764	120.613	122.035	118.552	120.953	118.636	115.451
	BPAG_0000076001	546	IPR003131: Potassium channel tetramerisation-type BTB domain; IPR011333: SKP1/BTB/POZ domain superfamily	GO:0051260 - BP - protein homooligomerization	04040: Ion channels	K04887: potassium voltage-gated channel Shaw-related subfamily C member 1	-		Bm2679	N	WBGene00222940	Bma-shw-3	Voltage-dependent potassium channel alpha subunit, putative [Source:UniProtKB/TrEMBL;Acc:A0A4E9FNM9]	4.6e-26	39.5	172		14	32	32	24	11	26	39	27	34	19	30		15.8644	31.233	31.7409	25.8702	12.5751	20.9502	36.8674	25.5083	30.393	19.419	32.1013		2.12549	4.18892	4.33802	3.49427	1.72131	2.88854	5.0661	3.53184
	BPAG_0000076101	858	-	-	-	-	-		Bm17982	Y	WBGene00269124	Bm17982	-	2.9e-111	93.5	170		254	331	339	251	266	364	297	315	361	298	277		287.825	323.067	336.255	270.56	304.088	293.303	280.759	297.597	322.702	304.572	296.402		24.5398	27.5731	29.2447	23.2554	26.4883	25.7343	24.5511	26.2212
	BPAG_0000076201	726	-	-	-	-	-		-	-	-	-	-	-	-	-		11	11	8	15	14	9	14	10	21	12	10		12.4649	10.7364	7.93521	16.1689	16.0046	7.25199	13.2344	9.44753	18.7721	12.2646	10.7004		1.25597	1.08293	0.815619	1.64245	1.6476	0.751976	1.36771	0.983769
	BPAG_0000076301	261	-	-	-	-	-		-	-	-	-	-	-	-	-		15	12	9	8	6	17	11	9	11	7	9		16.9975	11.7124	8.92711	8.62341	6.85913	13.6982	10.3985	8.50278	9.83302	7.15437	9.63039		4.76404	3.28614	2.55233	2.43662	1.96413	3.95099	2.98919	2.46281
	BPAG_0000076401	120	-	-	-	-	-		-	-	-	-	-	-	-	-		1	0	0	0	0	1	1	0	0	0	0		1.13317	0	0	0	0	0.805777	0.945317	0	0	0	0		0.690785	0	0	0	0	0.505495	0.591045	0
	BPAG_0000076501	219	-	-	-	-	-		-	-	-	-	-	-	-	-		1	0	1	0	0	0	3	0	3	1	1		1.13317	0	0.991902	0	0	0	2.83595	0	2.68173	1.02205	1.07004		0.378512	0	0.337979	0	0	0	0.971581	0
	BPAG_0000076601	5045	-	GO:0003676 - MF - nucleic acid binding; GO:0008270 - MF - zinc ion binding	03000: Transcription factors	K09239: human immunodeficiency virus type I enhancer-binding protein	-		Bm5568	Y	WBGene00225829	Bma-sma-9	BMA-SMA-9, isoform a [Source:UniProtKB/TrEMBL;Acc:A0A1U7F005]	0	94.8	1680		3292	3821	3836	3691	3500	4834	4274	4007	4394	3615	3737		3730.39	3729.42	3804.93	3978.63	4001.16	3895.13	4040.29	3785.63	3927.84	3694.72	3998.75		54.0907	54.1328	56.2797	58.1595	59.2743	58.1224	60.0863	56.7268
	BPAG_0000076701	1200	IPR002123: Phospholipid/glycerol acyltransferase; IPR032098: Acyltransferase, C-terminal domain	GO:0008152 - BP - metabolic process; GO:0016746 - MF - transferase activity, transferring acyl groups	-	-	-		Bm1873a	Y	WBGene00222134	Bm1873	BMA-ACL-12, isoform b [Source:UniProtKB/TrEMBL;Acc:A0A1P6BSD7]	4.3e-294	98	399		1653	1719	1719	1577	1503	2222	1807	1792	1911	1711	1744		1873.13	1677.8	1705.08	1699.89	1718.21	1790.44	1708.19	1693	1708.26	1748.73	1866.16		114.187	102.386	106.03	104.469	107.013	112.321	106.802	106.656
	BPAG_0000076801	1245	-	GO:0006629 - BP - lipid metabolic process	-	-	-		Bm2446	Y	WBGene00222707	Bm2446	BMA-SPP-10 [Source:UniProtKB/TrEMBL;Acc:A0A1U7F3L5]	1.2e-246	98.8	343		5369	5808	5044	4838	4290	6075	5097	5304	4613	4440	4487		6083.98	5668.8	5003.15	5215.01	4904.28	4895.1	4818.28	5010.97	4123.61	4537.92	4801.28		357.477	333.428	299.875	308.911	294.407	295.989	290.367	304.273
	BPAG_0000076901	1278	-	-	-	-	-		Bm7728	Y	WBGene00227989	Bm7728	Bm7728 [Source:UniProtKB/TrEMBL;Acc:A0A158T1J3]	0	96.5	430		193	218	235	165	136	222	205	185	218	163	145		218.702	212.775	233.097	177.858	155.474	178.883	193.79	174.779	194.873	166.595	155.156		12.5185	12.1919	13.6104	10.2634	9.09218	10.5371	11.3769	10.3388
	BPAG_0000077001	885	IPR000719: Protein kinase domain; IPR008271: Serine/threonine-protein kinase, active site; IPR011009: Protein kinase-like domain superfamily; IPR017441: Protein kinase, ATP binding site	GO:0004672 - MF - protein kinase activity; GO:0005524 - MF - ATP binding; GO:0006468 - BP - protein phosphorylation	01001: Protein kinases; 03036: Chromosome and associated proteins; 04068: FoxO signaling pathway; 04310: Wnt signaling pathway; 04340: Hedgehog signaling pathway; 04341: Hedgehog signaling pathway - fly; 04390: Hippo signaling pathway; 04391: Hippo signaling pathway - fly; 04392: Hippo signaling pathway - multiple species; 04710: Circadian rhythm; 04711: Circadian rhythm - fly	K08960: casein kinase 1, epsilon	-		Bm4148a	Y	WBGene00224409	Bma-kin-20	BMA-KIN-20, isoform d [Source:UniProtKB/TrEMBL;Acc:A0A1P6C098]	4.6e-224	100	294		957	1058	1275	1150	1199	1659	1478	1416	1490	1294	1319		1084.44	1032.64	1264.67	1239.62	1370.68	1336.78	1397.18	1337.77	1331.93	1322.54	1411.39		89.6382	85.4451	106.635	103.298	115.754	113.711	118.449	114.275
	BPAG_0000077101	1797	IPR001194: cDENN domain; IPR005112: dDENN domain; IPR005113: uDENN domain; IPR037516: Tripartite DENN domain	-	04131: Membrane trafficking	K20160: -	-		Bm4151a	Y	WBGene00224412	Bma-rme-4	BMA-RME-4 [Source:UniProtKB/TrEMBL;Acc:A0A0H5RZ79]	0	95.6	573		2974	3690	3484	3056	2754	4013	3523	3452	3634	3266	2993		3370.04	3601.56	3455.79	3294.14	3148.34	3233.58	3330.35	3261.29	3248.47	3338.03	3202.64		137.188	146.765	143.504	135.189	130.941	135.463	139.049	137.199
	BPAG_0000077201	2211	-	GO:0005515 - MF - protein binding; GO:0005737 - CC - cytoplasm; GO:0007165 - BP - signal transduction	04131: Membrane trafficking; 04530: Tight junction	K20638: -	-		Bm1878	Y	WBGene00222139	Bma-rga-8	Rho-GAP domain-containing protein [Source:UniProtKB/TrEMBL;Acc:A0A4E9EUJ0]	0	98.5	736		2858	3587	3446	3494	3296	4756	4038	4054	3767	3538	3619		3238.6	3501.03	3418.09	3766.28	3767.95	3832.28	3817.19	3830.03	3367.36	3616.02	3872.49		107.151	115.954	115.361	125.624	127.367	130.482	129.533	130.956
	BPAG_0000077301	327	-	-	-	-	-		-	-	-	-	-	-	-	-		2	2	0	4	4	2	1	7	2	1	6		2.26634	1.95207	0	4.31171	4.57276	1.61155	0.945317	6.61327	1.78782	1.02205	6.42026		0.506998	0.437147	0	0.972411	1.04513	0.371005	0.216897	1.5289
	BPAG_0000077401	1914	-	-	-	-	-		Bm7727	Y	WBGene00227988	Bm7727	Bm7727 [Source:UniProtKB/TrEMBL;Acc:A0A0H5SCQ9]	0	86	645		2979	3298	3243	2932	2648	3522	3065	3019	3277	2727	2690		3375.71	3218.96	3216.74	3160.48	3027.16	2837.95	2897.4	2852.21	2929.35	2787.14	2878.42		129.019	123.155	125.412	121.775	118.205	111.621	113.577	112.655
	BPAG_0000077501	981	IPR007967: GSKIP domain; IPR023231: GSKIP domain superfamily; IPR037395: GSK3B-interacting protein	GO:0051018 - MF - protein kinase A binding; GO:0060828 - BP - regulation of canonical Wnt signaling pathway	-	-	-		Bm2002a	Y	WBGene00222263	Bm2002	DUF727 domain-containing protein [Source:UniProtKB/TrEMBL;Acc:A0A4E9ESV7]	7.8e-212	92.3	326		1143	1414	1414	1317	1328	2004	1750	1547	1641	1425	1483		1295.21	1380.11	1402.55	1419.63	1518.15	1614.78	1654.3	1461.53	1466.91	1456.43	1586.87		96.5832	103.021	106.688	106.722	115.662	123.916	126.523	112.629
	BPAG_0000077601	1089	IPR002347: Short-chain dehydrogenase/reductase SDR; IPR020904: Short-chain dehydrogenase/reductase, conserved site; IPR036291: NAD(P)-binding domain superfamily	GO:0016491 - MF - oxidoreductase activity	-	-	-		Bm7726	Y	WBGene00227987	Bm7726	Bm7726 [Source:UniProtKB/TrEMBL;Acc:A0A0H5RZC7]	1.8e-223	88.8	356		381	364	377	371	378	536	439	500	464	419	401		431.737	355.276	373.947	399.911	432.125	431.897	414.994	472.377	414.775	428.24	429.087		29.0016	23.8901	25.624	27.0822	29.6568	29.8562	28.5916	32.7923
	BPAG_0000077701	417	IPR003131: Potassium channel tetramerisation-type BTB domain; IPR011333: SKP1/BTB/POZ domain superfamily	GO:0051260 - BP - protein homooligomerization	-	-	-		Bm4237	Y	WBGene00224498	Bm4237	BTB_2 domain-containing protein [Source:UniProtKB/TrEMBL;Acc:A0A4E9EV85]	2.6e-98	96.5	141		552	703	652	521	472	639	545	544	547	470	476		625.509	686.151	646.72	561.6	539.585	514.892	515.198	513.946	488.969	480.365	509.341		109.73	120.494	115.73	99.3206	96.7087	92.9529	92.6963	93.1735
	BPAG_0000077801	2430	-	GO:0016021 - CC - integral component of membrane; GO:0055085 - BP - transmembrane transport	-	-	-		Bm2847a	Y	WBGene00223108	Bma-gem-1	BMA-GEM-1 [Source:UniProtKB/TrEMBL;Acc:A0A5S6PIU3]	0	93.3	811		917	1094	1098	990	1117	1370	1270	1277	1233	1053	1103		1039.12	1067.78	1089.11	1067.15	1276.94	1103.91	1200.55	1206.45	1102.19	1076.22	1180.26		31.2815	32.1778	33.4449	32.3867	39.2741	34.1989	37.068	37.5331
	BPAG_0000077901	195	-	-	-	-	-		Bm2847a	N	WBGene00223108	Bma-gem-1	BMA-GEM-1 [Source:UniProtKB/TrEMBL;Acc:A0A5S6PIU3]	1.9e-15	93.9	33		5	4	9	8	13	20	14	15	20	7	8		5.66584	3.90413	8.92711	8.62341	14.8615	16.1155	13.2344	14.1713	17.8782	7.15437	8.56035		2.12549	1.46612	3.41619	3.26132	5.69598	6.22148	5.09208	5.49397
	BPAG_0000078001	1167	IPR005036: CBM21 (carbohydrate binding type-21) domain; IPR038175: CBM21 domain superfamily	GO:0005515 - MF - protein binding	01009: Protein phosphatases and associated proteins; 04910: Insulin signaling pathway; 04931: Insulin resistance	K07189: protein phosphatase 1 regulatory subunit 3A/B/C/D/E	-		Bm4656a	Y	WBGene00224917	Bm4656	CBM21 domain-containing protein [Source:UniProtKB/TrEMBL;Acc:A0A4E9ESU1]	1.3e-267	97.3	369		438	441	439	496	393	710	444	509	577	509	459		496.328	430.43	435.445	534.652	449.273	572.102	419.721	480.879	515.787	520.225	491.15		31.112	27.0093	27.8438	33.7869	28.7728	36.905	26.9845	31.1513
	BPAG_0000078101	561	IPR000048: IQ motif, EF-hand binding site; IPR027417: P-loop containing nucleoside triphosphate hydrolase	GO:0005515 - MF - protein binding	-	-	-		Bm3950	Y	WBGene00224211	Bm3950	Bm3950 [Source:UniProtKB/TrEMBL;Acc:A0A0K0JCJ1]	3.5e-104	97.1	172		56	69	83	52	55	89	78	63	55	69	52		63.4574	67.3462	82.3278	56.0522	62.8754	71.7142	73.7347	59.5195	49.1651	70.5217	55.6422		8.27465	8.79085	10.9509	7.36848	8.37644	9.62333	9.86129	8.02061
	BPAG_0000078201	209	-	GO:0046983 - MF - protein dimerization activity	-	-	-		Bm11439	N	WBGene00231700	Bma-ahr-1	Aryl hydrocarbon receptor AHR-1, putative [Source:UniProtKB/TrEMBL;Acc:A0A4E9FLB6]	3.5e-34	98.4	63		11	10	12	5	15	16	12	10	10	11	7		12.4649	9.76033	11.9028	5.38963	17.1478	12.8924	11.3438	9.44753	8.93911	11.2426	7.4903		4.36285	3.41978	4.24981	1.90178	6.13204	4.64378	4.07227	3.4173
	BPAG_0000078301	498	-	-	-	-	-		Bm1384a	Y	WBGene00221645	Bm1384	-	4.1e-111	92	174		2	0	1	8	4	6	1	1	4	7	3		2.26634	0	0.991902	8.62341	4.57276	4.83466	0.945317	0.944753	3.57564	7.15437	3.21013		0.332908	0	0.148629	1.27702	0.686263	0.730836	0.14242	0.143417
[truncated: 13,890 more rows]
[truncated: 45 more columns]
